# Supplementary material for: Network-Based Integrative Analysis of Genomics, Epigenomics and Transcriptomics in Autism Spectrum Disorders
Source: Int J Mol Sci. 2019 Jul 9;20(13):3363. doi: 10.3390/ijms20133363 (PMC6651137; doi:10.3390/ijms20133363)
Supplement: Supplementary file 1 [file ijms-20-03363-s001.zip]

Archive with 9 entries (6 files):
- ijms-538370 supplementary/
- ijms-538370 supplementary/Supplementary_Figures.pdf
- ijms-538370 supplementary/Supplementary_Tables1-7.xlsx
- __MACOSX/
- __MACOSX/._ijms-538370 supplementary
- __MACOSX/ijms-538370 supplementary/
- __MACOSX/ijms-538370 supplementary/._Supplementary_Figures.docx
- __MACOSX/ijms-538370 supplementary/._Supplementary_Tables1-7.xlsx
- __MACOSX/ijms-538370 supplementary/._~$Supplementary_Tables1-7.xlsx
