# Supplementary material for: Network-Based Integrative Analysis of Genomics, Epigenomics and Transcriptomics in Autism Spectrum Disorders
Source: Int J Mol Sci. 2019 Jul 9;20(13):3363. doi: 10.3390/ijms20133363 (PMC6651137; doi:10.3390/ijms20133363)
Supplement: Supplementary file 1 [file ijms-20-03363-s001.zip › ijms-538370 supplementary/Supplementary_Tables1-7.xlsx]

## Sheet: Readme
1	Network-based gene prioritization based on genomics data
2	Network-based gene prioritization based on genomics, epigenomics and transcriptomics data
3	Occurrence of the INT-MODULE genes in other studies
4	Gene clusters within the INT-MODULE
5	Pathways-by-clusters table
6	List of significant pathways
7	SFARI classification of genes predicted in previous work by our group (Mosca et al., 2017)

## Sheet: 1
gene_id	symbol	description	interactions	GEN	EPI	TRA	Status	GEN: Xss	GEN: p	GEN: Xss * (-log10(p))	CORE+13
9378	NRXN1	neurexin 1	46	1	0	0	C	0.518	0.001	1.553	C
9369	NRXN3	neurexin 3	45	1	0	0	C	0.516	0.001	1.549	C
22871	NLGN1	neuroligin 1	27	1	0	0	C	0.482	0.001	1.445	C
57502	NLGN4X	neuroligin 4 X-linked	27	1	0	0	C	0.482	0.001	1.445	C
54413	NLGN3	neuroligin 3	28	1	0	0	C	0.479	0.001	1.438	C
9229	DLGAP1	DLG associated protein 1	22	1	0	0	C	0.467	0.001	1.4	C
22941	SHANK2	SH3 and multiple ankyrin repeat domains 2	25	1	0.5	0	C	0.464	0.001	1.392	C
50944	SHANK1	SH3 and multiple ankyrin repeat domains 1	25	1	0	0	C	0.464	0.001	1.392	C
1499	CTNNB1	catenin beta 1	365	1	0	0.5	C	0.46	0.001	1.381	C
2033	EP300	E1A binding protein p300	505	1	0	0.5	C	0.459	0.001	1.378	C
25836	NIPBL	NIPBL cohesin loading factor	42	1	0	1	C	0.446	0.001	1.339	C
10243	GPHN	gephyrin	13	1	1	0	C	0.445	0.001	1.336	C
2556	GABRA3	gamma-aminobutyric acid type A receptor alpha3 subunit	17	1	0	0	C	0.444	0.001	1.332	C
2562	GABRB3	gamma-aminobutyric acid type A receptor beta3 subunit	15	1	0.5	0	C	0.443	0.001	1.329	C
2567	GABRG3	gamma-aminobutyric acid type A receptor gamma3 subunit	12	1	0	0	C	0.439	0.001	1.316	C
348980	HCN1	hyperpolarization activated cyclic nucleotide gated potassium channel 1	2	1	0	0	C	0.475	0.002	1.283	C
23241	PACS2	phosphofurin acidic cluster sorting protein 2	2	1	1	0	C	0.542	0.005	1.247	C
816	CAMK2B	calcium/calmodulin dependent protein kinase II beta	97	1	0	0	C	0.413	0.001	1.24	C
8850	KAT2B	lysine acetyltransferase 2B	245	1	0	0.5	C	0.412	0.001	1.235	C
9611	NCOR1	nuclear receptor corepressor 1	200	1	0	0.5	C	0.411	0.001	1.233	C
775	CACNA1C	calcium voltage-gated channel subunit alpha1 C	82	1	0	0	C	0.411	0.001	1.232	C
4297	KMT2A	lysine methyltransferase 2A	94	1	0	0	C	0.41	0.001	1.23	C
10142	AKAP9	A-kinase anchoring protein 9	207	1	0	0	C	0.409	0.001	1.228	C
25942	SIN3A	SIN3 transcription regulator family member A	151	1	0	1	C	0.407	0.001	1.22	C
777	CACNA1E	calcium voltage-gated channel subunit alpha1 E	39	1	0	0	C	0.406	0.001	1.218	C
815	CAMK2A	calcium/calmodulin dependent protein kinase II alpha	78	1	0	0	C	0.405	0.001	1.216	C
5579	PRKCB	protein kinase C beta	155	1	0	0.5	C	0.403	0.001	1.209	C
783	CACNB2	calcium voltage-gated channel auxiliary subunit beta 2	62	1	0	0	C	0.402	0.001	1.205	C
776	CACNA1D	calcium voltage-gated channel subunit alpha1 D	73	1	0	0	C	0.401	0.001	1.204	C
2890	GRIA1	glutamate ionotropic receptor AMPA type subunit 1	113	1	0	0	C	0.401	0.001	1.204	C
6326	SCN2A	sodium voltage-gated channel alpha subunit 2	32	1	0	0	C	0.399	0.001	1.198	C
5062	PAK2	p21 (RAC1) activated kinase 2	178	1	0	0.5	C	0.399	0.001	1.197	C
2904	GRIN2B	glutamate ionotropic receptor NMDA type subunit 2B	61	1	0	0	C	0.398	0.001	1.195	C
8912	CACNA1H	calcium voltage-gated channel subunit alpha1 H	34	1	0.5	0	C	0.398	0.001	1.193	C
6597	SMARCA4	SWI/SNF related, matrix associated, actin dependent regulator of chromatin, subfamily a, member 4	84	1	0	0	C	0.396	0.001	1.187	C
26523	AGO1	argonaute RISC component 1	166	1	0.5	0	C	0.393	0.001	1.18	C
23229	ARHGEF9	Cdc42 guanine nucleotide exchange factor 9	27	1	0	0	C	0.393	0.001	1.178	C
58508	KMT2C	lysine methyltransferase 2C	107	1	0	1	C	0.391	0.001	1.172	C
6812	STXBP1	syntaxin binding protein 1	27	1	0	0	C	0.39	0.001	1.171	C
4208	MEF2C	myocyte enhancer factor 2C	73	1	0	1	C	0.39	0.001	1.17	C
23112	TNRC6B	trinucleotide repeat containing adaptor 6B	121	1	0	0	C	0.389	0.001	1.166	C
23191	CYFIP1	cytoplasmic FMR1 interacting protein 1	158	1	0	0	C	0.389	0.001	1.166	C
2902	GRIN1	glutamate ionotropic receptor NMDA type subunit 1	52	1	0	0	C	0.388	0.001	1.165	C
6601	SMARCC2	SWI/SNF related, matrix associated, actin dependent regulator of chromatin subfamily c member 2	72	1	0.5	0.5	C	0.387	0.001	1.162	C
55799	CACNA2D3	calcium voltage-gated channel auxiliary subunit alpha2delta 3	19	1	0	0	C	0.387	0.001	1.162	C
7337	UBE3A	ubiquitin protein ligase E3A	290	1	0	0	C	0.387	0.001	1.16	C
3912	LAMB1	laminin subunit beta 1	179	1	0	0	C	0.386	0.001	1.157	C
55690	PACS1	phosphofurin acidic cluster sorting protein 1	3	1	0	0.5	C	0.428	0.002	1.156	C
6857	SYT1	synaptotagmin 1	151	1	0	0	C	0.384	0.001	1.153	C
287	ANK2	ankyrin 2	108	1	0	0	C	0.384	0.001	1.151	C
288	ANK3	ankyrin 3	108	1	0	0	C	0.384	0.001	1.151	C
5528	PPP2R5D	protein phosphatase 2 regulatory subunit B'delta	250	1	0	0.5	C	0.382	0.001	1.145	C
79718	TBL1XR1	transducin beta like 1 X-linked receptor 1	113	1	0	0	C	0.381	0.001	1.143	C
2898	GRIK2	glutamate ionotropic receptor kainate type subunit 2	8	1	0	0	C	0.38	0.001	1.141	C
6595	SMARCA2	SWI/SNF related, matrix associated, actin dependent regulator of chromatin, subfamily a, member 2	45	1	0	0	C	0.38	0.001	1.14	C
773	CACNA1A	calcium voltage-gated channel subunit alpha1 A	26	1	0.5	0	C	0.38	0.001	1.139	C
5885	RAD21	RAD21 cohesin complex component	175	1	0	0.5	C	0.379	0.001	1.136	C
9126	SMC3	structural maintenance of chromosomes 3	193	1	0	0	C	0.379	0.001	1.136	C
57492	ARID1B	AT-rich interaction domain 1B	32	1	1	0	C	0.378	0.001	1.134	C
6934	TCF7L2	transcription factor 7 like 2	86	1	1	0	C	0.378	0.001	1.133	C
8243	SMC1A	structural maintenance of chromosomes 1A	184	1	0	0	C	0.377	0.001	1.132	C
4233	MET	MET proto-oncogene, receptor tyrosine kinase	102	1	0	0	C	0.377	0.001	1.131	C
23332	CLASP1	cytoplasmic linker associated protein 1	211	1	0	0.5	C	0.376	0.001	1.129	C
8452	CUL3	cullin 3	366	1	0	0.5	C	0.376	0.001	1.129	C
10274	STAG1	stromal antigen 1	171	1	0	0	C	0.376	0.001	1.128	C
7528	YY1	YY1 transcription factor	133	1	0	0.5	C	0.376	0.001	1.128	C
1788	DNMT3A	DNA methyltransferase 3 alpha	77	1	0	0	C	0.375	0.001	1.125	C
80184	CEP290	centrosomal protein 290	181	1	0	0	C	0.373	0.001	1.12	C
8924	HERC2	HECT and RLD domain containing E3 ubiquitin protein ligase 2	307	1	0	0.5	C	0.372	0.001	1.117	C
9759	HDAC4	histone deacetylase 4	104	1	0.5	0	C	0.371	0.001	1.114	C
6335	SCN9A	sodium voltage-gated channel alpha subunit 9	21	1	0	0	C	0.37	0.001	1.11	C
7248	TSC1	TSC complex subunit 1	60	1	0	0	C	0.369	0.001	1.106	C
9320	TRIP12	thyroid hormone receptor interactor 12	265	1	0	1	C	0.368	0.001	1.104	C
7249	TSC2	TSC complex subunit 2	54	1	0.5	0	C	0.368	0.001	1.103	C
5071	PRKN	parkin RBR E3 ubiquitin protein ligase	270	1	0	0	C	0.366	0.001	1.097	C
9820	CUL7	cullin 7	284	1	0	0	C	0.365	0.001	1.095	C
55904	KMT2E	lysine methyltransferase 2E	56	1	1	0.5	C	0.365	0.001	1.094	C
23067	SETD1B	SET domain containing 1B, histone lysine methyltransferase	58	1	0	1	C	0.364	0.001	1.091	C
80204	FBXO11	F-box protein 11	297	1	0	0	C	0.363	0.001	1.09	C
55870	ASH1L	ASH1 like histone lysine methyltransferase	7	1	0	0	C	0.363	0.001	1.088	C
1496	CTNNA2	catenin alpha 2	28	1	0.5	0	C	0.362	0.001	1.085	C
7403	KDM6A	lysine demethylase 6A	82	1	0	0	C	0.361	0.001	1.084	C
55869	HDAC8	histone deacetylase 8	74	1	0	0	C	0.361	0.001	1.082	C
51132	RLIM	ring finger protein, LIM domain interacting	256	1	0	0	C	0.36	0.001	1.081	C
57520	HECW2	HECT, C2 and WW domain containing E3 ubiquitin protein ligase 2	256	1	0.5	0	C	0.36	0.001	1.081	C
10787	NCKAP1	NCK associated protein 1	57	1	0	0	C	0.36	0.001	1.08	C
95681	CEP41	centrosomal protein 41	117	1	0	0.5	C	0.36	0.001	1.08	C
5364	PLXNB1	plexin B1	26	1	0	0	C	0.36	0.001	1.079	C
22981	NINL	ninein like	114	1	0	0	C	0.359	0.001	1.078	C
3785	KCNQ2	potassium voltage-gated channel subfamily Q member 2	26	1	0	0	C	0.357	0.001	1.07	C
3786	KCNQ3	potassium voltage-gated channel subfamily Q member 3	26	1	0	0	C	0.357	0.001	1.07	C
4763	NF1	neurofibromin 1	90	1	0	0.5	C	0.357	0.001	1.07	C
54806	AHI1	Abelson helper integration site 1	99	1	0	0.5	C	0.356	0.001	1.068	C
7014	TERF2	telomeric repeat binding factor 2	66	1	0	0	C	0.354	0.001	1.062	C
123169	LEO1	LEO1 homolog, Paf1/RNA polymerase II complex component	96	1	0	0	C	0.354	0.001	1.061	C
23345	SYNE1	spectrin repeat containing nuclear envelope protein 1	53	1	0	0.5	C	0.354	0.001	1.061	C
10664	CTCF	CCCTC-binding factor	67	1	0	0	C	0.352	0.001	1.057	C
3198	HOXA1	homeobox A1	61	1	1	0	C	0.35	0.001	1.049	C
5080	PAX6	paired box 6	62	1	0.5	0	C	0.35	0.001	1.049	C
4089	SMAD4	SMAD family member 4	167	1	0.5	0.5	C	0.388	0.002	1.048	C
6305	SBF1	SET binding factor 1	6	1	0	0.5	C	0.349	0.001	1.047	C
11133	KPTN	kaptin, actin binding protein	4	1	0	0	C	0.386	0.002	1.043	C
4650	MYO9B	myosin IXB	39	1	0.5	0.5	C	0.346	0.001	1.039	C
6925	TCF4	transcription factor 4	36	1	1	0	C	0.383	0.002	1.034	C
5728	PTEN	phosphatase and tensin homolog	145	1	0	0	C	0.382	0.002	1.031	C
57680	CHD8	chromodomain helicase DNA binding protein 8	29	1	0	0.5	C	0.343	0.001	1.028	C
29072	SETD2	SET domain containing 2, histone lysine methyltransferase	12	1	0	0	C	0.381	0.002	1.027	C
2901	GRIK5	glutamate ionotropic receptor kainate type subunit 5	8	1	0	0	C	0.38	0.002	1.027	C
673	BRAF	B-Raf proto-oncogene, serine/threonine kinase	114	1	0	0	C	0.38	0.002	1.026	C
3720	JARID2	jumonji and AT-rich interaction domain containing 2	34	1	0	0.5	C	0.341	0.001	1.023	C
1105	CHD1	chromodomain helicase DNA binding protein 1	39	1	0	0	C	0.34	0.001	1.021	C
23135	KDM6B	lysine demethylase 6B	49	1	0	0.5	C	0.34	0.001	1.019	C
4952	OCRL	OCRL inositol polyphosphate-5-phosphatase	190	1	0	0	C	0.377	0.002	1.018	C
51366	UBR5	ubiquitin protein ligase E3 component n-recognin 5	10	1	0	1	C	0.337	0.001	1.01	C
23469	PHF3	PHD finger protein 3	2	1	0	0	C	0.337	0.001	1.01	C
23025	UNC13A	unc-13 homolog A	5	1	0	0	C	0.374	0.002	1.009	C
1107	CHD3	chromodomain helicase DNA binding protein 3	128	1	0	1	C	0.373	0.002	1.005	C
6334	SCN8A	sodium voltage-gated channel alpha subunit 8	28	1	0	0	C	0.37	0.002	0.999	C
4983	OPHN1	oligophrenin 1	19	1	0	0	C	0.333	0.001	0.999	C
51322	WAC	WW domain containing adaptor with coiled-coil	26	1	0	0.5	C	0.331	0.001	0.993	C
55209	SETD5	SET domain containing 5	1	1	0	0.5	C	0.33	0.001	0.989	C
5296	PIK3R2	phosphoinositide-3-kinase regulatory subunit 2	338	1	0.5	0	C	0.39	0.003	0.983	C
8812	CCNK	cyclin K	141	1	0	0.5	C	0.363	0.002	0.979	C
51741	WWOX	WW domain containing oxidoreductase	4	1	0	0	C	0.326	0.001	0.979	C
10075	HUWE1	HECT, UBA and WWE domain containing 1, E3 ubiquitin protein ligase	264	1	0	0	C	0.363	0.002	0.979	C
4204	MECP2	methyl-CpG binding protein 2	8	1	0	0	C	0.326	0.001	0.978	C
91584	PLXNA4	plexin A4	31	1	0	0.5	C	0.362	0.002	0.976	C
491	ATP2B2	ATPase plasma membrane Ca2+ transporting 2	2	1	0	0	C	0.325	0.001	0.975	C
9690	UBE3C	ubiquitin protein ligase E3C	260	1	0	0	C	0.361	0.002	0.974	C
84231	TRAF7	TNF receptor associated factor 7	256	1	0	0	C	0.36	0.002	0.972	C
9662	CEP135	centrosomal protein 135	114	1	0	0	C	0.359	0.002	0.97	C
6009	RHEB	Ras homolog, mTORC1 binding	38	1	0	0	C	0.359	0.002	0.968	C
3690	ITGB3	integrin subunit beta 3	200	1	0	0	C	0.384	0.003	0.968	C
8936	WASF1	WASP family member 1	55	1	0	0	C	0.357	0.002	0.963	C
1778	DYNC1H1	dynein cytoplasmic 1 heavy chain 1	442	1	1	0.5	C	0.4	0.004	0.96	C
1139	CHRNA7	cholinergic receptor nicotinic alpha 7 subunit	13	1	0	0	C	0.379	0.003	0.955	C
6872	TAF1	TATA-box binding protein associated factor 1	88	1	0	0	C	0.354	0.002	0.955	C
2475	MTOR	mechanistic target of rapamycin kinase	107	1	1	0	C	0.378	0.003	0.954	C
7508	XPC	XPC complex subunit, DNA damage recognition and repair factor	98	1	0	0	C	0.353	0.002	0.954	C
6531	SLC6A3	solute carrier family 6 member 3	13	1	0	0	C	0.353	0.002	0.953	C
23426	GRIP1	glutamate receptor interacting protein 1	26	1	0	0	C	0.353	0.002	0.952	C
9681	DEPDC5	DEP domain containing 5	15	1	0	0	C	0.395	0.004	0.948	C
4010	LMX1B	LIM homeobox transcription factor 1 beta	11	1	0	0	C	0.375	0.003	0.947	C
4915	NTRK2	neurotrophic receptor tyrosine kinase 2	55	1	0	0	C	0.351	0.002	0.946	C
22866	CNKSR2	connector enhancer of kinase suppressor of Ras 2	57	1	0	0	C	0.349	0.002	0.943	C
26058	GIGYF2	GRB10 interacting GYF protein 2	3	1	0	0	C	0.373	0.003	0.942	C
134492	NUDCD2	NudC domain containing 2	1	1	0	0.5	C	0.314	0.001	0.942	C
55023	PHIP	pleckstrin homology domain interacting protein	8	1	0	0.5	C	0.391	0.004	0.937	C
7994	KAT6A	lysine acetyltransferase 6A	47	1	0	0.5	C	0.347	0.002	0.935	C
6323	SCN1A	sodium voltage-gated channel alpha subunit 1	19	1	0	0	C	0.345	0.002	0.931	C
8242	KDM5C	lysine demethylase 5C	3	1	0	0	C	0.369	0.003	0.93	C
6197	RPS6KA3	ribosomal protein S6 kinase A3	32	1	0	0.5	C	0.344	0.002	0.93	C
5026	P2RX5	purinergic receptor P2X 5	6	1	0	0.5	C	0.385	0.004	0.923	C
1120	CHKB	choline kinase beta	9	1	0	0	C	0.399	0.005	0.918	C
2200	FBN1	fibrillin 1	120	1	0.5	0	C	0.359	0.003	0.907	C
57580	PREX1	phosphatidylinositol-3,4,5-trisphosphate dependent Rac exchange factor 1	25	1	0	0.5	C	0.336	0.002	0.906	C
4644	MYO5A	myosin VA	51	1	0	1	C	0.357	0.003	0.901	C
3800	KIF5C	kinesin family member 5C	12	1	0	0	C	0.333	0.002	0.899	C
8404	SPARCL1	SPARC like 1	108	1	0	0	C	0.354	0.003	0.893	C
43	ACHE	acetylcholinesterase (Cartwright blood group)	4	1	0	0	C	0.386	0.005	0.889	C
26512	INTS6	integrator complex subunit 6	85	1	0	0.5	C	0.352	0.003	0.888	C
6660	SOX5	SRY-box 5	3	1	0	0.5	C	0.431	0.009	0.881	C
54439	RBM27	RNA binding motif protein 27	10	1	0	0	C	0.349	0.003	0.88	C
4212	MEIS2	Meis homeobox 2	13	1	0	0	C	0.418	0.008	0.876	C
10021	HCN4	hyperpolarization activated cyclic nucleotide gated potassium channel 4	4	0.5	0.5	0	PH	0.365	0.004	0.875	PR
170302	ARX	aristaless related homeobox	3	1	0	0	C	0.509	0.02	0.865	C
2290	FOXG1	forkhead box G1	6	1	1	0	C	0.32	0.002	0.865	C
27255	CNTN6	contactin 6	7	1	0	0	C	0.342	0.003	0.862	C
5649	RELN	reelin	25	1	0	0	C	0.34	0.003	0.858	C
6092	ROBO2	roundabout guidance receptor 2	30	1	0	0	C	0.357	0.004	0.855	C
1106	CHD2	chromodomain helicase DNA binding protein 2	1	1	0	0	C	0.315	0.002	0.85	C
113246	C12orf57	chromosome 12 open reading frame 57	2	1	0	0	C	0.354	0.004	0.848	C
5587	PRKD1	protein kinase D1	19	1	0	0	C	0.336	0.003	0.847	C
51107	APH1A	aph-1 homolog A, gamma-secretase subunit	35	1	0	0	C	0.353	0.004	0.847	C
476	ATP1A1	ATPase Na+/K+ transporting subunit alpha 1	32	1	0	0	C	0.381	0.006	0.846	C
5781	PTPN11	protein tyrosine phosphatase non-receptor type 11	259	1	0	0	C	0.392	0.007	0.845	C
64599	GIGYF1	GRB10 interacting GYF protein 1	1	1	0	0	C	0.313	0.002	0.844	C
9969	MED13	mediator complex subunit 13	67	1	0	0	C	0.352	0.004	0.843	C
79813	EHMT1	euchromatic histone lysine methyltransferase 1	61	1	0.5	0	C	0.334	0.003	0.842	C
23389	MED13L	mediator complex subunit 13 like	60	1	0.5	0	C	0.351	0.004	0.842	C
9928	KIF14	kinesin family member 14	54	1	0	0	C	0.334	0.003	0.842	C
85015	USP45	ubiquitin specific peptidase 45	5	1	0	0	C	0.309	0.002	0.835	C
10743	RAI1	retinoic acid induced 1	5	1	0.5	0	C	0.329	0.003	0.829	C
4628	MYH10	myosin heavy chain 10	46	1	0	0	C	0.356	0.005	0.818	C
59269	HIVEP3	human immunodeficiency virus type I enhancer binding protein 3	61	1	0	0	C	0.34	0.004	0.815	C
1756	DMD	dystrophin	84	1	0	0	C	0.378	0.007	0.814	C
23236	PLCB1	phospholipase C beta 1	191	1	0	0	C	0.353	0.005	0.813	C
53942	CNTN5	contactin 5	66	1	0	0	C	0.353	0.005	0.813	C
2239	GPC4	glypican 4	58	1	0	0	C	0.365	0.006	0.812	C
23126	POGZ	pogo transposable element derived with ZNF domain	3	1	0	0	C	0.387	0.008	0.811	C
5718	PSMD12	proteasome 26S subunit, non-ATPase 12	211	1	0	0	C	0.364	0.006	0.809	C
5079	PAX5	paired box 5	10	1	0	0	C	0.334	0.004	0.802	C
9568	GABBR2	gamma-aminobutyric acid type B receptor subunit 2	253	1	0	0	C	0.358	0.006	0.794	C
23152	CIC	capicua transcriptional repressor	2	1	0	0	C	0.412	0.012	0.791	C
152330	CNTN4	contactin 4	67	1	0	0	C	0.356	0.006	0.79	C
134957	STXBP5	syntaxin binding protein 5	7	1	0	0	C	0.329	0.004	0.789	C
3745	KCNB1	potassium voltage-gated channel subfamily B member 1	12	1	0	0	C	0.327	0.004	0.785	C
478	ATP1A3	ATPase Na+/K+ transporting subunit alpha 3	26	1	0	0	C	0.382	0.009	0.782	C
7204	TRIO	trio Rho guanine nucleotide exchange factor	178	1	0	1	C	0.35	0.006	0.779	C
5096	PCCB	propionyl-CoA carboxylase subunit beta	25	1	0	0	C	0.349	0.006	0.775	C
6878	TAF6	TATA-box binding protein associated factor 6	139	1	0	0	C	0.359	0.007	0.773	C
27086	FOXP1	forkhead box P1	1	1	0	0.5	C	0.322	0.004	0.771	C
27071	DAPP1	dual adaptor of phosphotyrosine and 3-phosphoinositides 1	38	1	0	0.5	C	0.335	0.005	0.77	C
112939	NACC1	nucleus accumbens associated 1	1	1	0	0	C	0.305	0.003	0.769	C
1593	CYP27A1	cytochrome P450 family 27 subfamily A member 1	16	1	0	0	C	0.364	0.008	0.763	C
1760	DMPK	DM1 protein kinase	1	1	0.5	0	C	0.316	0.004	0.758	C
8493	PPM1D	protein phosphatase, Mg2+/Mn2+ dependent 1D	2	1	0	0	C	0.316	0.004	0.757	C
116986	AGAP2	ArfGAP with GTPase domain, ankyrin repeat and PH domain 2	9	1	0	0	C	0.327	0.005	0.752	C
9891	NUAK1	NUAK family kinase 1	2	1	0	0	C	0.311	0.004	0.746	C
56853	CELF4	CUGBP Elav-like family member 4	1	1	0	0	C	0.309	0.004	0.741	C
552	AVPR1A	arginine vasopressin receptor 1A	160	1	0	0	C	0.342	0.007	0.738	C
144165	PRICKLE1	prickle planar cell polarity protein 1	55	1	0.5	0	C	0.332	0.006	0.737	C
5253	PHF2	PHD finger protein 2	2	1	0	0.5	C	0.331	0.006	0.736	C
81704	DOCK8	dedicator of cytokinesis 8	7	1	0	0.5	C	0.397	0.014	0.735	C
1808	DPYSL2	dihydropyrimidinase like 2	26	1	0	0	C	0.348	0.008	0.729	C
22999	RIMS1	regulating synaptic membrane exocytosis 1	29	1	0	0	C	0.348	0.008	0.729	C
57634	EP400	E1A binding protein p400	80	1	0.5	0.5	C	0.356	0.009	0.727	C
158	ADSL	adenylosuccinate lyase	66	1	0	0	C	0.371	0.011	0.726	C
8140	SLC7A5	solute carrier family 7 member 5	2	1	1	0	C	0.337	0.007	0.726	C
8621	CDK13	cyclin dependent kinase 13	20	1	0	0	C	0.326	0.006	0.725	C
83696	TRAPPC9	trafficking protein particle complex 9	71	1	0.5	0.5	C	0.345	0.008	0.724	C
6095	RORA	RAR related orphan receptor A	22	1	0.5	0.5	C	0.336	0.007	0.724	C
150094	SIK1	salt inducible kinase 1	15	1	0	0	C	0.335	0.007	0.723	C
1012	CDH13	cadherin 13	20	1	0.5	0	C	0.351	0.009	0.719	C
322	APBB1	amyloid beta precursor protein binding family B member 1	27	1	0	0	C	0.333	0.007	0.717	C
4076	CAPRIN1	cell cycle associated protein 1	2	1	0	0.5	C	0.311	0.005	0.716	C
2332	FMR1	fragile X mental retardation 1	19	1	0	0	C	0.33	0.007	0.712	C
22854	NTNG1	netrin G1	67	1	1	0	C	0.355	0.01	0.711	C
161725	OTUD7A	OTU deubiquitinase 7A	4	1	0	0	C	0.309	0.005	0.71	C
5625	PRODH	proline dehydrogenase 1	8	1	0	0	C	0.347	0.009	0.709	C
10847	SRCAP	Snf2 related CREBBP activator protein	17	1	0	0	C	0.338	0.008	0.709	C
8864	PER2	period circadian regulator 2	26	1	0	0	C	0.337	0.008	0.706	C
8974	P4HA2	prolyl 4-hydroxylase subunit alpha 2	55	1	0	0	C	0.353	0.01	0.706	C
55624	POMGNT1	protein O-linked mannose N-acetylglucosaminyltransferase 1 (beta 1,2-)	8	1	0	0	C	0.36	0.011	0.704	C
51111	KMT5B	lysine methyltransferase 5B	1	1	0	0.5	C	0.306	0.005	0.704	C
7025	NR2F1	nuclear receptor subfamily 2 group F member 1	11	1	0	0	C	0.327	0.007	0.704	C
1826	DSCAM	DS cell adhesion molecule	9	1	0	0	C	0.324	0.007	0.699	C
5095	PCCA	propionyl-CoA carboxylase subunit alpha	25	1	0	0.5	C	0.349	0.01	0.698	C
10765	KDM5B	lysine demethylase 5B	4	1	0.5	0.5	C	0.313	0.006	0.696	C
6683	SPAST	spastin	5	1	0	0.5	C	0.311	0.006	0.692	C
26053	AUTS2	activator of transcription and developmental regulator AUTS2	11	1	1	0	C	0.319	0.007	0.687	C
259266	ASPM	abnormal spindle microtubule assembly	128	1	0	0	C	0.357	0.012	0.685	C
3150	HMGN1	high mobility group nucleosome binding domain 1	70	1	0	0	C	0.334	0.009	0.683	C
27185	DISC1	DISC1 scaffold protein	1	1	0.5	0	C	0.303	0.006	0.674	C
84623	KIRREL3	kirre like nephrin family adhesion molecule 3	1	1	0	0	C	0.312	0.007	0.672	C
93986	FOXP2	forkhead box P2	3	1	1	0	C	0.341	0.011	0.669	C
254048	UBN2	ubinuclein 2	3	1	0	0.5	C	0.31	0.007	0.667	C
3608	ILF2	interleukin enhancer binding factor 2	130	1	0	0	C	0.359	0.014	0.665	C
7874	USP7	ubiquitin specific peptidase 7	85	1	0	0	C	0.344	0.012	0.662	C
55777	MBD5	methyl-CpG binding domain protein 5	19	1	0	0	C	0.322	0.009	0.659	C
80155	NAA15	N(alpha)-acetyltransferase 15, NatA auxiliary subunit	16	1	0	0	C	0.349	0.013	0.658	C
9578	CDC42BPB	CDC42 binding protein kinase beta	1	1	0	0	C	0.305	0.007	0.657	C
55636	CHD7	chromodomain helicase DNA binding protein 7	3	1	0.5	0	C	0.313	0.008	0.657	C
5021	OXTR	oxytocin receptor	162	1	0	0	C	0.342	0.012	0.657	C
8216	LZTR1	leucine zipper like transcription regulator 1	3	1	0	0	C	0.321	0.009	0.656	C
900	CCNG1	cyclin G1	10	1	0	0.5	C	0.327	0.01	0.654	C
1717	DHCR7	7-dehydrocholesterol reductase	20	1	0	0	C	0.352	0.014	0.653	C
54715	RBFOX1	RNA binding fox-1 homolog 1	1	1	0	0	C	0.374	0.018	0.653	C
10295	BCKDK	branched chain ketoacid dehydrogenase kinase	4	1	0	0	C	0.318	0.009	0.65	C
122553	TRAPPC6B	trafficking protein particle complex 6B	70	1	0.5	0.5	C	0.345	0.013	0.65	C
5444	PON1	paraoxonase 1	27	1	0	0	C	0.335	0.012	0.644	C
270	AMPD1	adenosine monophosphate deaminase 1	23	1	0	0	C	0.335	0.012	0.643	C
4306	NR3C2	nuclear receptor subfamily 3 group C member 2	36	1	0	0.5	C	0.329	0.011	0.643	C
339122	RAB43	RAB43, member RAS oncogene family	91	1	0	0.5	C	0.347	0.014	0.643	C
26047	CNTNAP2	contactin associated protein like 2	1	1	0	0	C	0.327	0.011	0.641	C
166336	PRICKLE2	prickle planar cell polarity protein 2	2	1	0	0	C	0.327	0.011	0.641	C
10522	DEAF1	DEAF1 transcription factor	1	1	0	0	C	0.305	0.008	0.64	C
93594	TBC1D31	TBC1 domain family member 31	1	1	0	0	C	0.305	0.008	0.639	C
23211	ZC3H4	zinc finger CCCH-type containing 4	4	1	0	1	C	0.308	0.009	0.631	C
8831	SYNGAP1	synaptic Ras GTPase activating protein 1	15	1	0.5	0	C	0.327	0.012	0.628	C
301	ANXA1	annexin A1	356	1	0	0.5	C	0.355	0.017	0.628	C
23133	PHF8	PHD finger protein 8	19	1	0	0	C	0.319	0.011	0.625	C
9044	BTAF1	B-TFIID TATA-box binding protein associated factor 1	6	1	0	0	C	0.322	0.012	0.618	C
57578	UNC79	unc-79 homolog, NALCN channel complex subunit	2	1	0	0	C	0.42	0.034	0.617	C
53335	BCL11A	BAF chromatin remodeling complex subunit BCL11A	6	1	0.5	0	C	0.325	0.013	0.614	C
10237	SLC35B1	solute carrier family 35 member B1	2	1	0	0	C	0.319	0.012	0.612	C
1654	DDX3X	DEAD-box helicase 3 X-linked	10	1	0	1	C	0.312	0.011	0.611	C
23394	ADNP	activity dependent neuroprotector homeobox	5	1	0	1	C	0.311	0.011	0.61	C
275	AMT	aminomethyltransferase	29	1	0	0	C	0.343	0.017	0.607	C
3192	HNRNPU	heterogeneous nuclear ribonucleoprotein U	202	1	0	1	C	0.346	0.018	0.604	C
3766	KCNJ10	potassium voltage-gated channel subfamily J member 10	17	1	0	0	C	0.314	0.012	0.603	C
2628	GATM	glycine amidinotransferase	38	1	0	0	C	0.345	0.018	0.603	C
10055	SAE1	SUMO1 activating enzyme subunit 1	20	1	0	0	C	0.325	0.014	0.602	C
1523	CUX1	cut like homeobox 1	49	1	1	0.5	C	0.335	0.016	0.602	C
6506	SLC1A2	solute carrier family 1 member 2	6	1	0	0	C	0.362	0.023	0.594	C
10575	CCT4	chaperonin containing TCP1 subunit 4	187	1	0	0	C	0.354	0.021	0.594	C
23314	SATB2	SATB homeobox 2	3	1	0	0	C	0.309	0.012	0.593	C
80315	CPEB4	cytoplasmic polyadenylation element binding protein 4	5	1	0	0	C	0.309	0.012	0.593	C
117583	PARD3B	par-3 family cell polarity regulator beta	3	1	0	0	C	0.319	0.014	0.592	C
10771	ZMYND11	zinc finger MYND-type containing 11	18	1	0	0.5	C	0.319	0.014	0.591	C
55773	TBC1D23	TBC1 domain family member 23	3	1	0	0.5	C	0.333	0.017	0.59	C
7225	TRPC6	transient receptor potential cation channel subfamily C member 6	17	1	0	0	C	0.333	0.017	0.589	C
29929	ALG6	ALG6 alpha-1,3-glucosyltransferase	3	1	0.5	0	C	0.358	0.024	0.58	C
9295	SRSF11	serine and arginine rich splicing factor 11	238	1	0	0.5	C	0.354	0.023	0.58	C
7915	ALDH5A1	aldehyde dehydrogenase 5 family member A1	17	1	0	0.5	C	0.327	0.017	0.579	C
55914	ERBIN	erbb2 interacting protein	19	1	0	0	C	0.322	0.016	0.579	C
5862	RAB2A	RAB2A, member RAS oncogene family	75	1	0	0.5	C	0.343	0.021	0.575	C
7273	TTN	titin	44	1	0.5	0.5	C	0.347	0.022	0.575	C
83992	CTTNBP2	cortactin binding protein 2	25	1	0	0	C	0.329	0.018	0.574	C
80232	WDR26	WD repeat domain 26	10	1	0	0	C	0.337	0.02	0.573	C
9958	USP15	ubiquitin specific peptidase 15	19	1	0	0.5	C	0.319	0.016	0.573	C
84282	RNF135	ring finger protein 135	35	1	0	0.5	C	0.332	0.019	0.572	C
220	ALDH1A3	aldehyde dehydrogenase 1 family member A3	21	1	0	0	C	0.339	0.021	0.57	C
83473	KATNAL2	katanin catalytic subunit A1 like 2	2	1	0	0	C	0.315	0.016	0.566	C
4849	CNOT3	CCR4-NOT transcription complex subunit 3	28	1	0	0	C	0.333	0.02	0.565	C
9344	TAOK2	TAO kinase 2	5	1	0	0	C	0.315	0.017	0.558	C
22907	DHX30	DExH-box helicase 30	2	1	0	0	C	0.31	0.016	0.557	C
9228	DLGAP2	DLG associated protein 2	21	0.5	0	0	PH	0.319	0.018	0.557	PR
2109	ETFB	electron transfer flavoprotein subunit beta	5	1	0	0.5	C	0.358	0.028	0.555	C
26050	SLITRK5	SLIT and NTRK like family member 5	1	1	0	0	C	0.318	0.018	0.555	C
23001	WDFY3	WD repeat and FYVE domain containing 3	12	1	0	0.5	C	0.325	0.02	0.552	C
9758	FRMPD4	FERM and PDZ domain containing 4	1	1	0	0	C	0.302	0.015	0.552	C
610	HCN2	hyperpolarization activated cyclic nucleotide gated potassium and sodium channel 2	4	0.5	0	0	PH	0.343	0.025	0.549	PR
26610	ELP4	elongator acetyltransferase complex subunit 4	6	1	0	0	C	0.323	0.02	0.549	C
8905	AP1S2	adaptor related protein complex 1 subunit sigma 2	88	1	0	0	C	0.338	0.024	0.548	C
64207	IRF2BPL	interferon regulatory factor 2 binding protein like	3	1	0	0.5	C	0.332	0.023	0.544	C
11011	TLK2	tousled like kinase 2	6	1	0	0	C	0.322	0.021	0.541	C
8128	ST8SIA2	ST8 alpha-N-acetyl-neuraminide alpha-2,8-sialyltransferase 2	4	1	0	0	C	0.311	0.019	0.536	C
79143	MBOAT7	membrane bound O-acyltransferase domain containing 7	16	1	0	0	C	0.318	0.021	0.533	C
8853	ASAP2	ArfGAP with SH3 domain, ankyrin repeat and PH domain 2	16	1	0.5	0	C	0.32	0.022	0.531	C
1917	EEF1A2	eukaryotic translation elongation factor 1 alpha 2	79	1	0.5	0	C	0.323	0.023	0.528	C
5053	PAH	phenylalanine hydroxylase	25	1	0	0	C	0.329	0.025	0.528	C
1859	DYRK1A	dual specificity tyrosine phosphorylation regulated kinase 1A	9	1	0	0.5	C	0.332	0.026	0.526	C
109	ADCY3	adenylate cyclase 3	335	1	0	0	C	0.346	0.031	0.522	C
4781	NFIB	nuclear factor I B	18	1	0	0	C	0.315	0.022	0.521	C
1268	CNR1	cannabinoid receptor 1	229	1	0	0	C	0.338	0.029	0.52	C
26290	GALNT8	polypeptide N-acetylgalactosaminyltransferase 8	16	1	0	0	C	0.324	0.025	0.519	C
7316	UBC	ubiquitin C	1168	0.5	0	0	PH	0.33	0.027	0.518	PR
100	ADA	adenosine deaminase	35	1	0.5	0	C	0.326	0.026	0.517	C
9037	SEMA5A	semaphorin 5A	38	1	0	0	C	0.331	0.028	0.515	C
23096	IQSEC2	IQ motif and Sec7 domain 2	5	1	0	0	C	0.32	0.025	0.513	C
57555	NLGN2	neuroligin 2	28	0.5	0	0	PH	0.333	0.029	0.512	PR
65109	UPF3B	UPF3B regulator of nonsense mediated mRNA decay	309	1	0	0	C	0.348	0.035	0.507	C
4784	NFIX	nuclear factor I X	18	1	0	1	C	0.315	0.025	0.504	C
5245	PHB	prohibitin	27	1	0.5	0.5	C	0.331	0.031	0.499	C
22884	WDR37	WD repeat domain 37	2	0	0	0.5	0	0.312	0.027	0.49	PR
119772	OR52M1	olfactory receptor family 52 subfamily M member 1	14	1	0	0	C	0.305	0.025	0.489	C
8898	MTMR2	myotubularin related protein 2	6	0.5	0	0	PH	0.307	0.027	0.481	PR
8562	DENR	density regulated re-initiation and release factor	32	1	0	0	C	0.312	0.029	0.48	C
2036	EPB41L1	erythrocyte membrane protein band 4.1 like 1	34	0.5	0	0	PH	0.3	0.027	0.471	PR
5119	CHMP1A	charged multivesicular body protein 1A	8	1	0	0	C	0.315	0.032	0.471	C
2558	GABRA5	gamma-aminobutyric acid type A receptor alpha5 subunit	17	0.5	0	0	PH	0.3	0.031	0.453	PR
6804	STX1A	syntaxin 1A	78	0.5	0	0	PH	0.279	0.025	0.447	PR
2035	EPB41	erythrocyte membrane protein band 4.1	16	0.5	0	1	PH	0.283	0.027	0.445	PR
778	CACNA1F	calcium voltage-gated channel subunit alpha1 F	37	0.5	0	0	PH	0.254	0.018	0.444	PR
5578	PRKCA	protein kinase C alpha	197	0.5	0.5	0.5	PH	0.264	0.021	0.443	PR
6448	SGSH	N-sulfoglucosamine sulfohydrolase	2	1	0.5	0	C	0.311	0.038	0.442	C
6261	RYR1	ryanodine receptor 1	41	0.5	1	0	PH	0.248	0.017	0.44	0
3065	HDAC1	histone deacetylase 1	297	0.5	0	0	PH	0.286	0.03	0.436	0
1739	DLG1	discs large MAGUK scaffold protein 1	53	0.5	0	0	PH	0.287	0.031	0.433	0
5881	RAC3	Rac family small GTPase 3	213	0.5	0	0	PH	0.284	0.03	0.433	0
5829	PXN	paxillin	172	0.5	0	0	PH	0.259	0.022	0.43	0
1137	CHRNA4	cholinergic receptor nicotinic alpha 4 subunit	15	0.5	0	0	PH	0.239	0.016	0.429	0
90506	LRRC46	leucine rich repeat containing 46	1	0	0	0	0	0.268	0.026	0.425	0
9640	ZNF592	zinc finger protein 592	5	0.5	0	0.5	PH	0.257	0.023	0.422	0
5567	PRKACB	protein kinase cAMP-activated catalytic subunit beta	216	0.5	1	0	PH	0.268	0.027	0.42	0
54509	RHOF	ras homolog family member F, filopodia associated	139	0.5	0	0.5	PH	0.258	0.024	0.418	0
6300	MAPK12	mitogen-activated protein kinase 12	91	0.5	0	0	PH	0.247	0.021	0.415	0
5595	MAPK3	mitogen-activated protein kinase 3	362	0.5	0	0	PH	0.282	0.035	0.41	0
1605	DAG1	dystroglycan 1	65	0.5	0	0	PH	0.271	0.031	0.409	0
6929	TCF3	transcription factor 3	54	0.5	0	0	PH	0.246	0.023	0.403	0
5025	P2RX4	purinergic receptor P2X 4	6	0.5	0	0	PH	0.25	0.025	0.401	0
4193	MDM2	MDM2 proto-oncogene	134	0.5	0	0	PH	0.25	0.025	0.4	0
5928	RBBP4	RB binding protein 4, chromatin remodeling factor	280	0.5	0	0.5	PH	0.28	0.038	0.398	0
89941	RHOT2	ras homolog family member T2	141	0.5	0	0	PH	0.259	0.029	0.398	0
23654	PLXNB2	plexin B2	12	0.5	0	0	PH	0.251	0.026	0.398	0
5592	PRKG1	protein kinase cGMP-dependent 1	52	0.5	0	0	PH	0.255	0.028	0.395	0
5600	MAPK11	mitogen-activated protein kinase 11	181	0.5	0	0	PH	0.253	0.028	0.394	0
64223	MLST8	MTOR associated protein, LST8 homolog	66	0.5	0	0	PH	0.24	0.023	0.393	0
2066	ERBB4	erb-b2 receptor tyrosine kinase 4	53	0.5	0	0	PH	0.225	0.019	0.388	0
1136	CHRNA3	cholinergic receptor nicotinic alpha 3 subunit	15	0.5	0	0	PH	0.239	0.024	0.387	0
6709	SPTAN1	spectrin alpha, non-erythrocytic 1	219	0.5	0	0.5	PH	0.248	0.028	0.385	0
23411	SIRT1	sirtuin 1	87	0.5	0	0	PH	0.213	0.016	0.383	0
6599	SMARCC1	SWI/SNF related, matrix associated, actin dependent regulator of chromatin subfamily c member 1	68	0.5	0	0.5	PH	0.234	0.023	0.383	0
4905	NSF	N-ethylmaleimide sensitive factor, vesicle fusing ATPase	144	0.5	0	0	PH	0.238	0.025	0.382	0
71	ACTG1	actin gamma 1	105	0.5	0	0	PH	0.246	0.028	0.382	0
338	APOB	apolipoprotein B	300	0.5	0	0	PH	0.253	0.031	0.381	0
6383	SDC2	syndecan 2	222	0.5	0	0	PH	0.248	0.03	0.378	0
8861	LDB1	LIM domain binding 1	43	0.5	0	0	PH	0.25	0.031	0.378	0
8945	BTRC	beta-transducin repeat containing E3 ubiquitin protein ligase	423	0.5	0	0	PH	0.24	0.027	0.377	0
2335	FN1	fibronectin 1	275	0.5	0	0	PH	0.24	0.027	0.376	0
321	APBA2	amyloid beta precursor protein binding family A member 2	7	0.5	0	0.5	PH	0.234	0.025	0.375	0
5519	PPP2R1B	protein phosphatase 2 scaffold subunit Abeta	258	0.5	0	0	PH	0.238	0.027	0.374	0
1759	DNM1	dynamin 1	190	0.5	0	0	PH	0.235	0.026	0.372	0
8065	CUL5	cullin 5	304	0.5	0	0	PH	0.221	0.022	0.367	0
8826	IQGAP1	IQ motif containing GTPase activating protein 1	107	0.5	0	0	PH	0.238	0.029	0.366	0
10451	VAV3	vav guanine nucleotide exchange factor 3	108	0.5	0	1	PH	0.226	0.024	0.365	0
54893	MTMR10	myotubularin related protein 10	1	0.5	0	0.5	PH	0.238	0.029	0.365	0
4851	NOTCH1	notch receptor 1	127	0.5	0	0	PH	0.253	0.036	0.365	0
83933	HDAC10	histone deacetylase 10	73	0.5	0	0	PH	0.212	0.019	0.365	0
8289	ARID1A	AT-rich interaction domain 1A	66	0.5	0	0.5	PH	0.243	0.032	0.363	0
8655	DYNLL1	dynein light chain LC8-type 1	467	0.5	0.5	0	PH	0.251	0.036	0.363	0
3791	KDR	kinase insert domain receptor	102	0.5	0	0	PH	0.236	0.029	0.362	0
11198	SUPT16H	SPT16 homolog, facilitates chromatin remodeling subunit	121	0.5	0	0	PH	0.235	0.029	0.361	0
440279	UNC13C	unc-13 homolog C	2	0.5	0	0	PH	0.242	0.032	0.361	0
54545	MTMR12	myotubularin related protein 12	5	0.5	0	0.5	PH	0.223	0.024	0.361	0
4854	NOTCH3	notch receptor 3	83	0.5	0.5	0	PH	0.227	0.026	0.359	0
83439	TCF7L1	transcription factor 7 like 1	67	0.5	0	0	PH	0.219	0.023	0.358	0
8295	TRRAP	transformation/transcription domain associated protein	130	0.5	1	0.5	PH	0.22	0.024	0.357	0
5565	PRKAB2	protein kinase AMP-activated non-catalytic subunit beta 2	69	0.5	0	0	PH	0.229	0.028	0.356	0
2742	GLRA2	glycine receptor alpha 2	4	0.5	0	0	PH	0.243	0.034	0.356	0
1080	CFTR	cystic fibrosis transmembrane conductance regulator	207	0.5	0	0	PH	0.224	0.026	0.354	0
3708	ITPR1	inositol 1,4,5-trisphosphate receptor type 1	89	0.5	0.5	0	PH	0.223	0.026	0.354	0
8607	RUVBL1	RuvB like AAA ATPase 1	213	0.5	0	0	PH	0.236	0.032	0.353	0
79176	FBXL15	F-box and leucine rich repeat protein 15	300	0.5	0	0	PH	0.215	0.023	0.352	0
23054	NCOA6	nuclear receptor coactivator 6	126	0.5	0	0.5	PH	0.226	0.028	0.351	0
8110	DPF3	double PHD fingers 3	52	0.5	0	0	PH	0.221	0.026	0.35	0
51665	ASB1	ankyrin repeat and SOCS box containing 1	296	0.5	0	0.5	PH	0.214	0.023	0.35	0
9275	BCL7B	BAF chromatin remodeling complex subunit BCL7B	14	0.5	0	0	PH	0.221	0.026	0.35	0
84261	FBXW9	F-box and WD repeat domain containing 9	305	0.5	0	0	PH	0.215	0.024	0.349	0
7454	WAS	WASP actin nucleation promoting factor	49	0.5	0	0.5	PH	0.208	0.021	0.348	0
7410	VAV2	vav guanine nucleotide exchange factor 2	119	0.5	0	0	PH	0.226	0.029	0.348	0
1869	E2F1	E2F transcription factor 1	111	0.5	0	0	PH	0.224	0.028	0.348	0
9021	SOCS3	suppressor of cytokine signaling 3	360	0.5	0	1	PH	0.228	0.03	0.348	0
3913	LAMB2	laminin subunit beta 2	154	0.5	0	0	PH	0.23	0.031	0.347	0
1019	CDK4	cyclin dependent kinase 4	140	0.5	0	0	PH	0.237	0.034	0.347	0
1017	CDK2	cyclin dependent kinase 2	240	0.5	0	0	PH	0.228	0.03	0.347	0
7328	UBE2H	ubiquitin conjugating enzyme E2 H	265	0.5	0	0.5	PH	0.219	0.026	0.347	0
55658	RNF126	ring finger protein 126	258	0.5	0	0	PH	0.212	0.023	0.347	0
80059	LRRTM4	leucine rich repeat transmembrane neuronal 4	3	0.5	0	0	PH	0.225	0.029	0.346	0
2113	ETS1	ETS proto-oncogene 1, transcription factor	33	0.5	0.5	0	PH	0.211	0.023	0.346	0
1399	CRKL	CRK like proto-oncogene, adaptor protein	106	0.5	0	0.5	PH	0.22	0.027	0.346	0
607	BCL9	BCL9 transcription coactivator	69	0.5	0	0.5	PH	0.208	0.022	0.345	0
3728	JUP	junction plakoglobin	160	0.5	0	0.5	PH	0.237	0.035	0.345	0
5590	PRKCZ	protein kinase C zeta	119	0.5	0.5	0	PH	0.217	0.026	0.345	0
2885	GRB2	growth factor receptor bound protein 2	214	0.5	0	0	PH	0.236	0.035	0.344	0
8440	NCK2	NCK adaptor protein 2	87	0.5	0	0	PH	0.224	0.029	0.344	0
5868	RAB5A	RAB5A, member RAS oncogene family	215	0.5	0	1	PH	0.232	0.033	0.344	0
8874	ARHGEF7	Rho guanine nucleotide exchange factor 7	85	0.5	0	0	PH	0.217	0.026	0.343	0
347240	KIF24	kinesin family member 24	97	0.5	0	0	PH	0.207	0.022	0.343	0
2623	GATA1	GATA binding protein 1	89	0.5	0	0	PH	0.229	0.032	0.343	0
20	ABCA2	ATP binding cassette subfamily A member 2	18	0.5	0	0	PH	0.225	0.03	0.343	0
88	ACTN2	actinin alpha 2	154	0.5	0	0	PH	0.229	0.032	0.343	0
481	ATP1B1	ATPase Na+/K+ transporting subunit beta 1	27	0.5	0	0.5	PH	0.237	0.036	0.343	0
1445	CSK	C-terminal Src kinase	134	0.5	0.5	0	PH	0.222	0.029	0.342	0
57674	RNF213	ring finger protein 213	257	0.5	0	0.5	PH	0.211	0.024	0.342	0
6396	SEC13	SEC13 homolog, nuclear pore and COPII coat complex component	222	0.5	0	0.5	PH	0.228	0.032	0.341	0
7846	TUBA1A	tubulin alpha 1a	172	0.5	0	0.5	PH	0.229	0.033	0.34	0
51429	SNX9	sorting nexin 9	149	0.5	0.5	0	PH	0.212	0.025	0.34	0
1453	CSNK1D	casein kinase 1 delta	294	0.5	0.5	0.5	PH	0.233	0.035	0.339	0
51143	DYNC1LI1	dynein cytoplasmic 1 light intermediate chain 1	253	0.5	0	0	PH	0.225	0.031	0.339	0
3996	LLGL1	LLGL scribble cell polarity complex component 1	12	0.5	0	0	PH	0.211	0.025	0.338	0
3619	INCENP	inner centromere protein	151	0.5	0	0	PH	0.206	0.023	0.337	0
11146	GLMN	glomulin, FKBP associated protein	281	0.5	0	0	PH	0.213	0.026	0.337	0
10193	RNF41	ring finger protein 41	261	0.5	0	0	PH	0.213	0.026	0.337	0
4627	MYH9	myosin heavy chain 9	68	0.5	0	0.5	PH	0.221	0.03	0.336	0
8468	FKBP6	FKBP prolyl isomerase 6	62	0.5	0	0	PH	0.217	0.028	0.336	0
1487	CTBP1	C-terminal binding protein 1	80	0.5	0	0.5	PH	0.212	0.026	0.336	0
1140	CHRNB1	cholinergic receptor nicotinic beta 1 subunit	16	0.5	0	0	PH	0.228	0.034	0.336	0
51666	ASB4	ankyrin repeat and SOCS box containing 4	297	0.5	0	0	PH	0.214	0.027	0.335	0
84961	FBXL20	F-box and leucine rich repeat protein 20	296	0.5	0	0	PH	0.214	0.027	0.335	0
8871	SYNJ2	synaptojanin 2	136	0.5	0	0.5	PH	0.216	0.028	0.335	0
7161	TP73	tumor protein p73	93	0.5	0	0	PH	0.208	0.025	0.333	0
10319	LAMC3	laminin subunit gamma 3	44	0.5	0	0	PH	0.21	0.026	0.333	0
26091	HERC4	HECT and RLD domain containing E3 ubiquitin protein ligase 4	257	0.5	0	0.5	PH	0.212	0.027	0.333	0
9031	BAZ1B	bromodomain adjacent to zinc finger domain 1B	64	0.5	0	0.5	PH	0.203	0.023	0.332	0
2664	GDI1	GDP dissociation inhibitor 1	113	0.5	0	0.5	PH	0.224	0.033	0.332	0
1454	CSNK1E	casein kinase 1 epsilon	244	0.5	0	0.5	PH	0.224	0.033	0.331	0
22897	CEP164	centrosomal protein 164	132	0.5	0.5	0	PH	0.215	0.029	0.331	0
51586	MED15	mediator complex subunit 15	64	0.5	0	0	PH	0.203	0.024	0.329	0
4602	MYB	MYB proto-oncogene, transcription factor	54	0.5	0	0.5	PH	0.213	0.029	0.328	0
3949	LDLR	low density lipoprotein receptor	129	0.5	0.5	0	PH	0.211	0.028	0.327	0
462	SERPINC1	serpin family C member 1	133	0.5	0	0	PH	0.215	0.03	0.327	0
1003	CDH5	cadherin 5	35	0.5	0	0	PH	0.219	0.032	0.327	0
85378	TUBGCP6	tubulin gamma complex associated protein 6	84	0.5	0	0.5	PH	0.206	0.026	0.326	0
3559	IL2RA	interleukin 2 receptor subunit alpha	78	0.5	0	0	PH	0.206	0.026	0.326	0
334	APLP2	amyloid beta precursor like protein 2	114	0.5	0	0	PH	0.218	0.032	0.326	0
10458	BAIAP2	BAI1 associated protein 2	59	0.5	0.5	0	PH	0.214	0.03	0.326	0
10273	STUB1	STIP1 homology and U-box containing protein 1	281	0.5	0	0	PH	0.223	0.035	0.325	0
23194	FBXL7	F-box and leucine rich repeat protein 7	346	0.5	0	0	PH	0.219	0.033	0.325	0
5869	RAB5B	RAB5B, member RAS oncogene family	193	0.5	0	0	PH	0.223	0.035	0.325	0
2065	ERBB3	erb-b2 receptor tyrosine kinase 3	50	0.5	0	0	PH	0.2	0.024	0.325	0
10423	CDIPT	CDP-diacylglycerol--inositol 3-phosphatidyltransferase	43	0.5	0	0	PH	0.235	0.042	0.324	0
3932	LCK	LCK proto-oncogene, Src family tyrosine kinase	209	0.5	0.5	0.5	PH	0.23	0.039	0.324	0
5701	PSMC2	proteasome 26S subunit, ATPase 2	252	0.5	0	0	PH	0.216	0.032	0.323	0
54014	BRWD1	bromodomain and WD repeat domain containing 1	7	0.5	0	0.5	PH	0.218	0.033	0.323	0
2768	GNA12	G protein subunit alpha 12	73	0.5	1	0	PH	0.199	0.024	0.323	0
345	APOC3	apolipoprotein C3	54	0.5	0	0	PH	0.206	0.027	0.323	0
10652	YKT6	YKT6 v-SNARE homolog	155	0.5	0	0	PH	0.218	0.033	0.323	0
950	SCARB2	scavenger receptor class B member 2	119	0.5	0	0	PH	0.208	0.028	0.323	0
50618	ITSN2	intersectin 2	134	0.5	0	0	PH	0.211	0.03	0.322	0
9857	CEP350	centrosomal protein 350	6	0.5	0	0.5	PH	0.213	0.031	0.322	0
5187	PER1	period circadian regulator 1	27	0.5	0.5	0	PH	0.205	0.027	0.322	0
26147	PHF19	PHD finger protein 19	36	0.5	0	0	PH	0.194	0.022	0.322	0
9856	KIAA0319	KIAA0319	118	0.5	0	0	PH	0.206	0.028	0.32	0
30011	SH3KBP1	SH3 domain containing kinase binding protein 1	160	0.5	0	1	PH	0.224	0.037	0.32	0
5532	PPP3CB	protein phosphatase 3 catalytic subunit beta	75	0.5	0	0.5	PH	0.222	0.036	0.32	0
1601	DAB2	DAB adaptor protein 2	125	0.5	0	0.5	PH	0.208	0.029	0.32	0
7082	TJP1	tight junction protein 1	23	0.5	0	0	PH	0.21	0.03	0.319	0
4137	MAPT	microtubule associated protein tau	31	0.5	0	0	PH	0.207	0.029	0.319	0
5239	PGM5	phosphoglucomutase 5	17	0.5	0	0	PH	0.205	0.028	0.319	0
63891	RNF123	ring finger protein 123	258	0.5	0	0	PH	0.211	0.031	0.318	0
6839	SUV39H1	suppressor of variegation 3-9 homolog 1	51	0.5	0	0	PH	0.196	0.024	0.318	0
10728	PTGES3	prostaglandin E synthase 3	113	0.5	0	0	PH	0.216	0.034	0.318	0
221037	JMJD1C	jumonji domain containing 1C	1	0.5	0	0.5	PH	0.198	0.025	0.318	0
9185	REPS2	RALBP1 associated Eps domain containing 2	119	0.5	0	0	PH	0.207	0.029	0.318	0
5316	PKNOX1	PBX/knotted 1 homeobox 1	65	0.5	0	0	PH	0.208	0.03	0.317	0
10645	CAMKK2	calcium/calmodulin dependent protein kinase kinase 2	18	0.5	0	0	PH	0.193	0.023	0.316	0
8720	MBTPS1	membrane bound transcription factor peptidase, site 1	117	0.5	0.5	0.5	PH	0.207	0.03	0.316	0
6874	TAF4	TATA-box binding protein associated factor 4	97	0.5	0	0.5	PH	0.201	0.027	0.316	0
396	ARHGDIA	Rho GDP dissociation inhibitor alpha	36	0.5	0	0.5	PH	0.203	0.028	0.316	0
1004	CDH6	cadherin 6	20	0.5	0	0	PH	0.206	0.03	0.314	0
10082	GPC6	glypican 6	58	0.5	0	0	PH	0.217	0.036	0.314	0
4638	MYLK	myosin light chain kinase	48	0.5	1	0	PH	0.209	0.032	0.313	0
23142	DCUN1D4	defective in cullin neddylation 1 domain containing 4	177	0.5	0	0	PH	0.195	0.025	0.312	0
1741	DLG3	discs large MAGUK scaffold protein 3	45	0	0	0	0	0.212	0.034	0.311	0
11176	BAZ2A	bromodomain adjacent to zinc finger domain 2A	55	0.5	0	0	PH	0.197	0.026	0.311	0
3952	LEP	leptin	70	0.5	0	0.5	PH	0.204	0.03	0.311	0
2580	GAK	cyclin G associated kinase	169	0.5	0.5	0	PH	0.215	0.036	0.311	0
5252	PHF1	PHD finger protein 1	34	0.5	1	0	PH	0.194	0.025	0.311	0
9901	SRGAP3	SLIT-ROBO Rho GTPase activating protein 3	26	0.5	0.5	0	PH	0.196	0.026	0.311	0
147841	SPC24	SPC24 component of NDC80 kinetochore complex	109	0.5	0	0.5	PH	0.2	0.028	0.31	0
2002	ELK1	ETS transcription factor ELK1	19	0.5	0	0	PH	0.202	0.029	0.31	0
26608	TBL2	transducin beta like 2	3	0.5	0	0	PH	0.201	0.029	0.309	0
2318	FLNC	filamin C	23	0.5	0	0	PH	0.211	0.034	0.309	0
1797	DXO	decapping exoribonuclease	8	0.5	0.5	0	PH	0.195	0.026	0.309	0
26267	FBXO10	F-box protein 10	296	0.5	0	0	PH	0.214	0.036	0.308	0
1154	CISH	cytokine inducible SH2 containing protein	164	0.5	0	0	PH	0.198	0.028	0.308	0
23513	SCRIB	scribble planar cell polarity protein	9	0.5	0	0	PH	0.21	0.034	0.308	0
2019	EN1	engrailed homeobox 1	2	0.5	0	0	PH	0.213	0.036	0.308	0
4052	LTBP1	latent transforming growth factor beta binding protein 1	112	0.5	0.5	0	PH	0.205	0.032	0.307	0
9379	NRXN2	neurexin 2	45	0	0	0	0	0.221	0.041	0.307	0
29119	CTNNA3	catenin alpha 3	11	0.5	0	0	PH	0.195	0.027	0.307	0
146760	RTN4RL1	reticulon 4 receptor like 1	66	0.5	0.5	0	PH	0.205	0.032	0.306	0
84861	KLHL22	kelch like family member 22	296	0.5	0	0	PH	0.214	0.037	0.306	0
3053	SERPIND1	serpin family D member 1	121	0.5	0	0	PH	0.207	0.034	0.305	0
57154	SMURF1	SMAD specific E3 ubiquitin protein ligase 1	313	0.5	0	0	PH	0.225	0.044	0.305	0
22954	TRIM32	tripartite motif containing 32	258	0.5	0	0	PH	0.211	0.036	0.304	0
64781	CERK	ceramide kinase	23	0.5	0	0.5	PH	0.21	0.036	0.304	0
493	ATP2B4	ATPase plasma membrane Ca2+ transporting 4	8	0.5	0	0.5	PH	0.185	0.023	0.304	0
27044	SND1	staphylococcal nuclease and tudor domain containing 1	64	0.5	0	0.5	PH	0.205	0.033	0.303	0
5831	PYCR1	pyrroline-5-carboxylate reductase 1	12	0.5	0	0	PH	0.211	0.037	0.303	0
2731	GLDC	glycine decarboxylase	24	0.5	0	0	PH	0.202	0.032	0.303	0
5663	PSEN1	presenilin 1	99	0.5	0	0	PH	0.209	0.036	0.302	0
8312	AXIN1	axin 1	120	0.5	0	0.5	PH	0.2	0.031	0.302	0
23224	SYNE2	spectrin repeat containing nuclear envelope protein 2	53	0.5	1	0	PH	0.206	0.034	0.302	0
4659	PPP1R12A	protein phosphatase 1 regulatory subunit 12A	62	0.5	0	0.5	PH	0.211	0.037	0.301	0
4637	MYL6	myosin light chain 6	52	0.5	0	0	PH	0.207	0.035	0.301	0
89839	ARHGAP11B	Rho GTPase activating protein 11B	40	0.5	0	0	PH	0.188	0.025	0.301	0
395	ARHGAP6	Rho GTPase activating protein 6	27	0.5	0	0	PH	0.184	0.023	0.301	0
7353	UFD1	ubiquitin recognition factor in ER associated degradation 1	37	0.5	0	0	PH	0.206	0.035	0.301	0
5034	P4HB	prolyl 4-hydroxylase subunit beta	179	0.5	0	0.5	PH	0.221	0.044	0.3	0
91614	DEPDC7	DEP domain containing 7	20	0.5	0	0	PH	0.183	0.023	0.3	0
558	AXL	AXL receptor tyrosine kinase	20	0.5	0	0	PH	0.181	0.022	0.299	0
1143	CHRNB4	cholinergic receptor nicotinic beta 4 subunit	127	0.5	0	0	PH	0.209	0.037	0.299	0
55666	NPLOC4	NPL4 homolog, ubiquitin recognition factor	30	0.5	0	0	PH	0.2	0.032	0.299	0
4978	OPCML	opioid binding protein/cell adhesion molecule like	66	0.5	0	0	PH	0.205	0.035	0.298	0
128239	IQGAP3	IQ motif containing GTPase activating protein 3	21	0.5	0.5	0	PH	0.192	0.028	0.298	0
81614	NIPA2	NIPA magnesium transporter 2	6	0.5	0	0	PH	0.206	0.036	0.297	0
5978	REST	RE1 silencing transcription factor	64	0.5	0	0	PH	0.199	0.032	0.297	0
2195	FAT1	FAT atypical cadherin 1	12	0.5	0.5	0	PH	0.185	0.025	0.297	0
10675	CSPG5	chondroitin sulfate proteoglycan 5	42	0.5	0	0	PH	0.213	0.041	0.296	0
9682	KDM4A	lysine demethylase 4A	51	0.5	0	0	PH	0.187	0.026	0.296	0
11113	CIT	citron rho-interacting serine/threonine kinase	18	0.5	0	0	PH	0.196	0.031	0.296	0
55320	MIS18BP1	MIS18 binding protein 1	81	0.5	0	0	PH	0.193	0.03	0.294	0
64131	XYLT1	xylosyltransferase 1	21	0.5	0	0	PH	0.191	0.029	0.294	0
7468	NSD2	nuclear receptor binding SET domain protein 2	57	0.5	1	0	PH	0.189	0.028	0.294	0
201254	CENPX	centromere protein X	87	0.5	0	0	PH	0.193	0.03	0.294	0
64333	ARHGAP9	Rho GTPase activating protein 9	19	0.5	0	0.5	PH	0.183	0.025	0.293	0
27076	LYPD3	LY6/PLAUR domain containing 3	66	0.5	0	0	PH	0.205	0.037	0.293	0
3679	ITGA7	integrin subunit alpha 7	18	0.5	0	0	PH	0.181	0.024	0.293	0
51513	ETV7	ETS variant 7	1	0.5	0	0	PH	0.201	0.035	0.292	0
2316	FLNA	filamin A	41	0.5	0	0	PH	0.201	0.035	0.292	0
147111	NOTUM	notum, palmitoleoyl-protein carboxylesterase	112	0.5	0	0	PH	0.205	0.038	0.292	0
89846	FGD3	FYVE, RhoGEF and PH domain containing 3	21	0.5	0	0	PH	0.183	0.026	0.29	0
3064	HTT	huntingtin	10	0.5	0	0	PH	0.211	0.042	0.29	0
9146	HGS	hepatocyte growth factor-regulated tyrosine kinase substrate	157	0.5	0	0	PH	0.216	0.046	0.289	0
27087	B3GAT1	beta-1,3-glucuronyltransferase 1	24	0.5	0	0.5	PH	0.193	0.032	0.289	0
6117	RPA1	replication protein A1	245	0.5	0	0	PH	0.228	0.055	0.288	0
9056	SLC7A7	solute carrier family 7 member 7	2	0.5	0	0	PH	0.187	0.029	0.287	0
1124	CHN2	chimerin 2	19	0.5	0	0.5	PH	0.183	0.027	0.287	0
83667	SESN2	sestrin 2	19	0.5	0	0	PH	0.194	0.033	0.287	0
55586	MIOX	myo-inositol oxygenase	7	0.5	0	0	PH	0.192	0.032	0.287	0
10130	PDIA6	protein disulfide isomerase family A member 6	120	0.5	0	0	PH	0.207	0.042	0.285	0
7037	TFRC	transferrin receptor	178	0.5	0	0	PH	0.215	0.047	0.285	0
6640	SNTA1	syntrophin alpha 1	16	0.5	0	0	PH	0.21	0.044	0.285	0
7007	TECTA	tectorin alpha	66	0.5	0	0	PH	0.205	0.041	0.284	0
123606	NIPA1	NIPA magnesium transporter 1	6	0.5	0	0	PH	0.206	0.042	0.283	0
8266	UBL4A	ubiquitin like 4A	13	0.5	0	0	PH	0.201	0.039	0.283	0
3563	IL3RA	interleukin 3 receptor subunit alpha	36	0.5	0	0	PH	0.187	0.031	0.283	0
5371	PML	promyelocytic leukemia	169	0.5	0	0.5	PH	0.213	0.047	0.283	0
56829	ZC3HAV1	zinc finger CCCH-type containing, antiviral 1	58	0.5	0	0	PH	0.202	0.04	0.282	0
23139	MAST2	microtubule associated serine/threonine kinase 2	1	0.5	0	0	PH	0.172	0.023	0.282	0
112476	PRRT2	proline rich transmembrane protein 2	17	0.5	0	0	PH	0.189	0.032	0.282	0
5982	RFC2	replication factor C subunit 2	168	0.5	0.5	0.5	PH	0.209	0.045	0.282	0
23168	RTF1	RTF1 homolog, Paf1/RNA polymerase II complex component	86	0.5	0	0	PH	0.198	0.038	0.282	0
6814	STXBP3	syntaxin binding protein 3	26	0.5	0	0	PH	0.2	0.039	0.281	0
8729	GBF1	golgi brefeldin A resistant guanine nucleotide exchange factor 1	115	0.5	0	0	PH	0.196	0.037	0.281	0
6694	SPP2	secreted phosphoprotein 2	123	0.5	0	0	PH	0.209	0.045	0.281	0
23030	KDM4B	lysine demethylase 4B	48	0.5	0	0	PH	0.188	0.032	0.28	0
59277	NTN4	netrin 4	11	0.5	0	0	PH	0.182	0.029	0.28	0
60412	EXOC4	exocyst complex component 4	47	0.5	0.5	1	PH	0.203	0.042	0.28	0
923	CD6	CD6 molecule	1	0.5	0	0.5	PH	0.202	0.041	0.28	0
51720	UIMC1	ubiquitin interaction motif containing 1	61	0.5	0	0.5	PH	0.187	0.032	0.28	0
133522	PPARGC1B	PPARG coactivator 1 beta	40	0.5	0	0	PH	0.198	0.039	0.279	0
9342	SNAP29	synaptosome associated protein 29	87	0.5	0	0	PH	0.203	0.042	0.279	0
9123	SLC16A3	solute carrier family 16 member 3	1	0.5	0	0	PH	0.172	0.024	0.279	0
898	CCNE1	cyclin E1	124	0.5	0	0	PH	0.202	0.042	0.278	0
346007	EYS	eyes shut homolog	1	0.5	0	0	PH	0.174	0.025	0.278	0
8408	ULK1	unc-51 like autophagy activating kinase 1	51	0.5	0.5	0	PH	0.203	0.043	0.277	0
4035	LRP1	LDL receptor related protein 1	36	0.5	0	0	PH	0.192	0.036	0.277	0
26084	ARHGEF26	Rho guanine nucleotide exchange factor 26	20	0.5	0	0	PH	0.184	0.031	0.277	0
10788	IQGAP2	IQ motif containing GTPase activating protein 2	11	0.5	0.5	1	PH	0.185	0.032	0.277	0
84812	PLCD4	phospholipase C delta 4	19	0.5	0	0	PH	0.187	0.033	0.277	0
2735	GLI1	GLI family zinc finger 1	112	0.5	0	0	PH	0.202	0.043	0.277	0
79902	NUP85	nucleoporin 85	231	0.5	0	0	PH	0.214	0.051	0.276	0
8913	CACNA1G	calcium voltage-gated channel subunit alpha1 G	5	0.5	0	0	PH	0.19	0.035	0.276	0
32	ACACB	acetyl-CoA carboxylase beta	28	0.5	0	0.5	PH	0.205	0.045	0.276	0
11136	SLC7A9	solute carrier family 7 member 9	4	0.5	0	0	PH	0.203	0.044	0.276	0
2581	GALC	galactosylceramidase	35	0.5	0	0	PH	0.211	0.049	0.276	0
253782	CERS6	ceramide synthase 6	5	0.5	0.5	0.5	PH	0.184	0.032	0.275	0
2274	FHL2	four and a half LIM domains 2	29	0.5	0.5	0	PH	0.19	0.036	0.275	0
3633	INPP5B	inositol polyphosphate-5-phosphatase B	43	0.5	0	0	PH	0.199	0.042	0.274	0
9515	STXBP5L	syntaxin binding protein 5 like	3	0.5	0	0	PH	0.174	0.027	0.273	0
3397	ID1	inhibitor of DNA binding 1, HLH protein	9	0.5	0	0	PH	0.199	0.043	0.272	0
9569	GTF2IRD1	GTF2I repeat domain containing 1	3	0.5	0	0	PH	0.178	0.03	0.272	0
5150	PDE7A	phosphodiesterase 7A	5	0.5	0	0.5	PH	0.176	0.029	0.271	0
5309	PITX3	paired like homeodomain 3	1	0.5	0	0	PH	0.161	0.021	0.271	0
146183	OTOA	otoancorin	66	0.5	0	0	PH	0.205	0.048	0.27	0
3984	LIMK1	LIM domain kinase 1	29	0.5	0	0	PH	0.195	0.041	0.27	0
4288	MKI67	marker of proliferation Ki-67	71	0.5	0	0	PH	0.193	0.04	0.27	0
79829	NAA40	N(alpha)-acetyltransferase 40, NatD catalytic subunit	3	0.5	0	0	PH	0.172	0.027	0.27	0
6778	STAT6	signal transducer and activator of transcription 6	115	0.5	0	0	PH	0.215	0.056	0.27	0
79058	ASPSCR1	ASPSCR1 tether for SLC2A4, UBX domain containing	28	0.5	0	0	PH	0.192	0.04	0.269	0
30846	EHD2	EH domain containing 2	17	0.5	0	0	PH	0.178	0.031	0.269	0
253980	KCTD13	potassium channel tetramerization domain containing 13	4	0.5	0	0	PH	0.198	0.044	0.268	0
10460	TACC3	transforming acidic coiled-coil containing protein 3	36	0.5	0	0	PH	0.181	0.033	0.268	0
79658	ARHGAP10	Rho GTPase activating protein 10	28	0.5	0	0.5	PH	0.194	0.042	0.267	0
51085	MLXIPL	MLX interacting protein like	27	0.5	0	0	PH	0.191	0.04	0.267	0
57589	RIC1	RIC1 homolog, RAB6A GEF complex partner 1	45	0.5	0	0.5	PH	0.188	0.038	0.266	0
3613	IMPA2	inositol monophosphatase 2	9	0.5	0	0.5	PH	0.198	0.045	0.266	0
7374	UNG	uracil DNA glycosylase	5	0.5	0	0	PH	0.162	0.023	0.266	0
4828	NMB	neuromedin B	158	0.5	0	0	PH	0.191	0.041	0.266	0
81624	DIAPH3	diaphanous related formin 3	17	0.5	0	0	PH	0.179	0.033	0.265	0
51003	MED31	mediator complex subunit 31	79	0.5	0	0.5	PH	0.201	0.048	0.265	0
6566	SLC16A1	solute carrier family 16 member 1	1	0.5	1	0	PH	0.172	0.029	0.264	0
56666	PANX2	pannexin 2	1	0.5	0	0	PH	0.215	0.059	0.264	0
10886	NPFFR2	neuropeptide FF receptor 2	157	0.5	0	0	PH	0.191	0.042	0.264	0
6866	TAC3	tachykinin 3	157	0.5	0	0	PH	0.191	0.042	0.264	0
1438	CSF2RA	colony stimulating factor 2 receptor alpha subunit	51	0.5	0	0	PH	0.19	0.042	0.262	0
4798	NFRKB	nuclear factor related to kappaB binding protein	43	0.5	0.5	0	PH	0.188	0.04	0.262	0
29781	NCAPH2	non-SMC condensin II complex subunit H2	35	0.5	0	0	PH	0.177	0.033	0.262	0
55160	ARHGEF10L	Rho guanine nucleotide exchange factor 10 like	19	0.5	1	0	PH	0.183	0.037	0.262	0
27332	ZNF638	zinc finger protein 638	7	0.5	0	0.5	PH	0.185	0.038	0.262	0
84919	PPP1R15B	protein phosphatase 1 regulatory subunit 15B	32	0.5	0	1	PH	0.183	0.037	0.262	0
26468	LHX6	LIM homeobox 6	5	0.5	0.5	0	PH	0.192	0.043	0.262	0
2131	EXT1	exostosin glycosyltransferase 1	14	0.5	0	0	PH	0.186	0.039	0.262	0
5137	PDE1C	phosphodiesterase 1C	11	0.5	0.5	0	PH	0.178	0.034	0.262	0
2149	F2R	coagulation factor II thrombin receptor	183	0.5	0	0	PH	0.197	0.047	0.262	0
7068	THRB	thyroid hormone receptor beta	22	0.5	0	0	PH	0.175	0.033	0.26	0
53981	CPSF2	cleavage and polyadenylation specific factor 2	237	0.5	0	0	PH	0.205	0.054	0.26	0
5986	RFNG	RFNG O-fucosylpeptide 3-beta-N-acetylglucosaminyltransferase	6	0.5	0	0.5	PH	0.178	0.035	0.26	0
79603	CERS4	ceramide synthase 4	5	0.5	0	0	PH	0.184	0.039	0.26	0
121214	SDR9C7	short chain dehydrogenase/reductase family 9C member 7	1	0.5	0.5	0	PH	0.169	0.029	0.259	0
55156	ARMC1	armadillo repeat containing 1	3	0.5	0	0	PH	0.169	0.029	0.259	0
9414	TJP2	tight junction protein 2	7	0.5	0	0.5	PH	0.176	0.034	0.259	0
9150	CTDP1	CTD phosphatase subunit 1	70	0.5	0.5	0.5	PH	0.185	0.04	0.258	0
10956	OS9	OS9 endoplasmic reticulum lectin	38	0.5	0	0	PH	0.193	0.046	0.258	0
121340	SP7	Sp7 transcription factor	3	0.5	0	0	PH	0.206	0.056	0.258	0
57097	PARP11	poly(ADP-ribose) polymerase family member 11	2	0.5	1	0	PH	0.174	0.033	0.258	0
4923	NTSR1	neurotensin receptor 1	158	0.5	0	0	PH	0.191	0.045	0.258	0
10024	TROAP	trophinin associated protein	42	0.5	0	0	PH	0.181	0.038	0.258	0
4985	OPRD1	opioid receptor delta 1	232	0.5	0	0	PH	0.197	0.049	0.257	0
9536	PTGES	prostaglandin E synthase	10	0.5	0	0	PH	0.187	0.042	0.257	0
857	CAV1	caveolin 1	62	0.5	0	0	PH	0.196	0.049	0.257	0
4738	NEDD8	neural precursor cell expressed, developmentally down-regulated 8	272	0.5	0	0	PH	0.21	0.06	0.256	0
60684	TRAPPC11	trafficking protein particle complex 11	21	0.5	0	0	PH	0.183	0.04	0.256	0
9557	CHD1L	chromodomain helicase DNA binding protein 1 like	65	0.5	1	0	PH	0.185	0.041	0.256	0
5139	PDE3A	phosphodiesterase 3A	6	0.5	0	0	PH	0.177	0.036	0.255	0
9024	BRSK2	BR serine/threonine kinase 2	6	0.5	0.5	0.5	PH	0.181	0.039	0.255	0
27165	GLS2	glutaminase 2	35	0.5	0	0	PH	0.198	0.052	0.254	0
9420	CYP7B1	cytochrome P450 family 7 subfamily B member 1	10	0.5	0	0	PH	0.19	0.046	0.254	0
5547	PRCP	prolylcarboxypeptidase	63	0.5	0	0	PH	0.193	0.049	0.253	0
79837	PIP4K2C	phosphatidylinositol-5-phosphate 4-kinase type 2 gamma	28	0.5	0	0	PH	0.189	0.046	0.253	0
10562	OLFM4	olfactomedin 4	85	0.5	0	0	PH	0.194	0.05	0.253	0
79671	NLRX1	NLR family member X1	5	0.5	0.5	0.5	PH	0.173	0.035	0.252	0
26509	MYOF	myoferlin	4	0.5	0	0	PH	0.164	0.029	0.252	0
760	CA2	carbonic anhydrase 2	7	0.5	0	0.5	PH	0.17	0.033	0.252	0
4287	ATXN3	ataxin 3	9	0.5	0	0	PH	0.167	0.031	0.252	0
3196	TLX2	T cell leukemia homeobox 2	1	0	0.5	0	0	0.206	0.06	0.251	0
1375	CPT1B	carnitine palmitoyltransferase 1B	5	0.5	0	0	PH	0.175	0.037	0.251	0
57510	XPO5	exportin 5	14	0.5	0	0	PH	0.182	0.042	0.251	0
51764	GNG13	G protein subunit gamma 13	497	0.5	0	0	PH	0.223	0.075	0.25	0
55818	KDM3A	lysine demethylase 3A	8	0.5	0	0	PH	0.174	0.037	0.25	0
820	CAMP	cathelicidin antimicrobial peptide	89	0.5	0	0	PH	0.195	0.052	0.25	0
2444	FRK	fyn related Src family tyrosine kinase	144	0.5	0	0	PH	0.203	0.059	0.25	0
23163	GGA3	golgi associated, gamma adaptin ear containing, ARF binding protein 3	27	0.5	0	0	PH	0.181	0.042	0.249	0
26009	ZZZ3	zinc finger ZZ-type containing 3	11	0.5	0	0.5	PH	0.171	0.035	0.249	0
8633	UNC5C	unc-5 netrin receptor C	10	0.5	0	0	PH	0.174	0.037	0.249	0
6451	SH3BGRL	SH3 domain binding glutamate rich protein like	4	0.5	0	0	PH	0.166	0.032	0.248	0
8448	DOC2A	double C2 domain alpha	1	0.5	0	0	PH	0.155	0.025	0.248	0
10548	TM9SF1	transmembrane 9 superfamily member 1	8	0.5	0	0	PH	0.167	0.033	0.248	0
23209	MLC1	megalencephalic leukoencephalopathy with subcortical cysts 1	17	0.5	0	0	PH	0.18	0.042	0.248	0
4199	ME1	malic enzyme 1	45	0.5	0	0	PH	0.19	0.05	0.248	0
23066	CAND2	cullin associated and neddylation dissociated 2 (putative)	4	0.5	0	0	PH	0.186	0.047	0.247	0
4692	NDN	necdin, MAGE family member	6	0.5	0	0	PH	0.17	0.035	0.247	0
993	CDC25A	cell division cycle 25A	112	0.5	0	0	PH	0.195	0.054	0.247	0
6472	SHMT2	serine hydroxymethyltransferase 2	46	0.5	0	0	PH	0.201	0.059	0.247	0
168544	ZNF467	zinc finger protein 467	1	0.5	0.5	0	PH	0.156	0.026	0.247	0
30012	TLX3	T cell leukemia homeobox 3	1	0	0	0	0	0.206	0.063	0.247	0
1775	DNASE1L2	deoxyribonuclease 1 like 2	3	0.5	0	0	PH	0.216	0.072	0.247	0
29969	MDFIC	MyoD family inhibitor domain containing	3	0.5	1	0	PH	0.176	0.04	0.247	0
54810	GIPC2	GIPC PDZ domain containing family member 2	1	0.5	0	0	PH	0.159	0.028	0.246	0
118	ADD1	adducin 1	9	0.5	0	0.5	PH	0.191	0.051	0.246	0
8038	ADAM12	ADAM metallopeptidase domain 12	8	0.5	0	0	PH	0.173	0.038	0.246	0
23620	NTSR2	neurotensin receptor 2	158	0.5	0	0	PH	0.191	0.052	0.246	0
23019	CNOT1	CCR4-NOT transcription complex subunit 1	44	0.5	0	0.5	PH	0.2	0.059	0.246	0
57534	MIB1	mindbomb E3 ubiquitin protein ligase 1	14	0.5	0	0.5	PH	0.176	0.04	0.246	0
8985	PLOD3	procollagen-lysine,2-oxoglutarate 5-dioxygenase 3	51	0.5	0	0	PH	0.189	0.05	0.246	0
1877	E4F1	E4F transcription factor 1	1	0.5	0	0	PH	0.155	0.026	0.246	0
4327	MMP19	matrix metallopeptidase 19	6	0.5	0	0	PH	0.169	0.035	0.245	0
2	A2M	alpha-2-macroglobulin	100	0.5	0	0	PH	0.198	0.058	0.245	0
3678	ITGA5	integrin subunit alpha 5	54	0.5	0	0	PH	0.186	0.048	0.245	0
91624	NEXN	nexilin F-actin binding protein	1	0.5	0	0	PH	0.174	0.039	0.245	0
4488	MSX2	msh homeobox 2	9	0.5	0	0	PH	0.188	0.05	0.245	0
10723	SLC12A7	solute carrier family 12 member 7	1	0.5	0.5	0	PH	0.159	0.029	0.245	0
8658	TNKS	tankyrase	62	0.5	0	0.5	PH	0.183	0.046	0.245	0
23363	OBSL1	obscurin like 1	14	0.5	0	0	PH	0.179	0.043	0.244	0
10721	POLQ	DNA polymerase theta	30	0.5	0	0	PH	0.179	0.044	0.243	0
27037	TRMT2A	tRNA methyltransferase 2 homolog A	12	0.5	0	0	PH	0.177	0.042	0.243	0
2261	FGFR3	fibroblast growth factor receptor 3	46	0.5	0	0	PH	0.187	0.05	0.243	0
5152	PDE9A	phosphodiesterase 9A	1	0.5	0	0	PH	0.174	0.04	0.243	0
350	APOH	apolipoprotein H	51	0.5	0	0	PH	0.194	0.056	0.243	0
6693	SPN	sialophorin	4	0.5	0	0	PH	0.199	0.06	0.243	0
56949	XAB2	XPA binding protein 2	250	0.5	0	0.5	PH	0.202	0.063	0.242	0
10514	MYBBP1A	MYB binding protein 1a	121	0.5	0	0	PH	0.192	0.055	0.242	0
581	BAX	BCL2 associated X, apoptosis regulator	42	0.5	0	0	PH	0.189	0.053	0.241	0
5740	PTGIS	prostaglandin I2 synthase	8	0.5	0	0	PH	0.186	0.051	0.241	0
55526	DHTKD1	dehydrogenase E1 and transketolase domain containing 1	14	0.5	0	0	PH	0.182	0.048	0.241	0
718	C3	complement C3	444	0.5	0	0	PH	0.223	0.084	0.24	0
967	CD63	CD63 molecule	57	0.5	0	0	PH	0.187	0.052	0.24	0
9961	MVP	major vault protein	1	0.5	0.5	0.5	PH	0.155	0.028	0.24	0
94025	MUC16	mucin 16, cell surface associated	63	0.5	0	0	PH	0.206	0.068	0.24	0
4162	MCAM	melanoma cell adhesion molecule	2	0.5	0	0	PH	0.159	0.031	0.24	0
5613	PRKX	protein kinase X-linked	1	0.5	0	0	PH	0.169	0.038	0.24	0
79004	CUEDC2	CUE domain containing 2	2	0.5	0	0	PH	0.156	0.029	0.24	0
4317	MMP8	matrix metallopeptidase 8	90	0.5	0	0	PH	0.196	0.06	0.239	0
27010	TPK1	thiamin pyrophosphokinase 1	12	0.5	0	0	PH	0.178	0.045	0.239	0
1962	EHHADH	enoyl-CoA hydratase and 3-hydroxyacyl CoA dehydrogenase	117	0.5	0	0	PH	0.206	0.069	0.239	0
25837	RAB26	RAB26, member RAS oncogene family	63	0.5	0	0	PH	0.189	0.054	0.239	0
23360	FNBP4	formin binding protein 4	2	0.5	0	0	PH	0.167	0.037	0.239	0
552900	BOLA2	bolA family member 2	2	0.5	0	0	PH	0.17	0.039	0.239	0
654483	BOLA2B	bolA family member 2B	2	0.5	0	0	PH	0.17	0.039	0.239	0
11108	PRDM4	PR/SET domain 4	6	0.5	0.5	0.5	PH	0.165	0.036	0.239	0
11311	VPS45	vacuolar protein sorting 45 homolog	18	0.5	0.5	0	PH	0.183	0.05	0.238	0
27352	SGSM3	small G protein signaling modulator 3	1	0.5	0	0	PH	0.155	0.029	0.238	0
8880	FUBP1	far upstream element binding protein 1	11	0.5	0	0.5	PH	0.17	0.04	0.238	0
79582	SPAG16	sperm associated antigen 16	1	0.5	0	0	PH	0.155	0.029	0.238	0
8608	RDH16	retinol dehydrogenase 16	12	0.5	0	0	PH	0.184	0.051	0.238	0
79823	CAMKMT	calmodulin-lysine N-methyltransferase	2	0.5	0.5	0	PH	0.166	0.037	0.238	0
2104	ESRRG	estrogen related receptor gamma	6	0.5	0.5	0	PH	0.17	0.04	0.238	0
10189	ALYREF	Aly/REF export factor	252	0.5	0	0.5	PH	0.204	0.069	0.237	0
5133	PDCD1	programmed cell death 1	19	0.5	0	0	PH	0.171	0.041	0.237	0
9218	VAPA	VAMP associated protein A	58	0.5	0	1	PH	0.186	0.053	0.237	0
5174	PDZK1	PDZ domain containing 1	2	0.5	0	0	PH	0.178	0.047	0.237	0
27148	STK36	serine/threonine kinase 36	5	0.5	0	0	PH	0.164	0.036	0.236	0
822	CAPG	capping actin protein, gelsolin like	12	0.5	0	0	PH	0.181	0.05	0.236	0
55844	PPP2R2D	protein phosphatase 2 regulatory subunit Bdelta	40	0.5	0	0	PH	0.188	0.056	0.236	0
9918	NCAPD2	non-SMC condensin I complex subunit D2	54	0.5	0	0	PH	0.185	0.053	0.236	0
51596	CUTA	cutA divalent cation tolerance homolog	1	0.5	0	0.5	PH	0.158	0.032	0.236	0
51561	IL23A	interleukin 23 subunit alpha	18	0.5	0	0.5	PH	0.174	0.044	0.236	0
8470	SORBS2	sorbin and SH3 domain containing 2	5	0.5	0	0	PH	0.171	0.042	0.236	0
23405	DICER1	dicer 1, ribonuclease III	33	0.5	0	0	PH	0.183	0.052	0.235	0
5796	PTPRK	protein tyrosine phosphatase receptor type K	7	0.5	0	0	PH	0.161	0.035	0.235	0
7812	CSDE1	cold shock domain containing E1	6	0.5	0.5	0.5	PH	0.172	0.043	0.235	0
4012	LNPEP	leucyl and cystinyl aminopeptidase	31	0.5	0	0	PH	0.179	0.049	0.234	0
55291	PPP6R3	protein phosphatase 6 regulatory subunit 3	9	0.5	0	0	PH	0.176	0.047	0.234	0
57282	SLC4A10	solute carrier family 4 member 10	1	0.5	0	0	PH	0.175	0.046	0.234	0
51110	LACTB2	lactamase beta 2	1	0.5	0	0.5	PH	0.159	0.034	0.234	0
8270	LAGE3	L antigen family member 3	9	0.5	0	0	PH	0.182	0.052	0.234	0
51601	LIPT1	lipoyltransferase 1	15	0.5	0	0	PH	0.186	0.055	0.234	0
10330	CNPY2	canopy FGF signaling regulator 2	1	0.5	0	0	PH	0.163	0.037	0.234	0
1469	CST1	cystatin SN	1	0.5	0.5	0	PH	0.205	0.073	0.233	0
283373	ANKRD52	ankyrin repeat domain 52	1	0.5	0	0	PH	0.16	0.035	0.233	0
1768	DNAH6	dynein axonemal heavy chain 6	10	0.5	0	0.5	PH	0.169	0.042	0.233	0
2194	FASN	fatty acid synthase	26	0.5	0	0	PH	0.2	0.069	0.233	0
3831	KLC1	kinesin light chain 1	124	0.5	0	0	PH	0.194	0.063	0.233	0
1742	DLG4	discs large MAGUK scaffold protein 4	89	0	0	0	0	0.205	0.074	0.232	0
57448	BIRC6	baculoviral IAP repeat containing 6	1	0.5	0	0	PH	0.158	0.034	0.232	0
54456	MOV10L1	Mov10 like RISC complex RNA helicase 1	16	0.5	0	0	PH	0.189	0.059	0.232	0
57597	BAHCC1	BAH domain and coiled-coil containing 1	1	0.5	0.5	0	PH	0.157	0.033	0.232	0
1767	DNAH5	dynein axonemal heavy chain 5	32	0.5	0	0	PH	0.185	0.056	0.232	0
80331	DNAJC5	DnaJ heat shock protein family (Hsp40) member C5	139	0.5	0	0	PH	0.198	0.068	0.232	0
1740	DLG2	discs large MAGUK scaffold protein 2	36	0	0	0	0	0.188	0.059	0.231	0
26353	HSPB8	heat shock protein family B (small) member 8	1	0.5	0	0	PH	0.157	0.034	0.231	0
143689	PIWIL4	piwi like RNA-mediated gene silencing 4	16	0.5	0	0	PH	0.189	0.06	0.231	0
10072	DPP3	dipeptidyl peptidase 3	2	0.5	0	0.5	PH	0.178	0.051	0.23	0
114785	MBD6	methyl-CpG binding domain protein 6	19	0.5	0	0	PH	0.172	0.046	0.23	0
1803	DPP4	dipeptidyl peptidase 4	8	0.5	0	0	PH	0.173	0.047	0.23	0
7481	WNT11	Wnt family member 11	64	0.5	0	0	PH	0.184	0.056	0.23	0
64784	CRTC3	CREB regulated transcription coactivator 3	4	0.5	0	0	PH	0.169	0.044	0.23	0
9693	RAPGEF2	Rap guanine nucleotide exchange factor 2	13	0.5	0	0.5	PH	0.178	0.051	0.23	0
79705	LRRK1	leucine rich repeat kinase 1	1	0.5	0	0	PH	0.156	0.034	0.229	0
150372	NFAM1	NFAT activating protein with ITAM motif 1	54	0.5	0	0	PH	0.183	0.056	0.229	0
79803	HPS6	HPS6 biogenesis of lysosomal organelles complex 2 subunit 3	12	0.5	0	0	PH	0.176	0.05	0.229	0
4640	MYO1A	myosin IA	9	0.5	0	0	PH	0.175	0.049	0.229	0
83942	TSSK1B	testis specific serine kinase 1B	1	0.5	0	0	PH	0.154	0.033	0.229	0
4850	CNOT4	CCR4-NOT transcription complex subunit 4	28	0.5	0	0.5	PH	0.183	0.056	0.229	0
401145	CCSER1	coiled-coil serine rich protein 1	2	0.5	0	0	PH	0.156	0.034	0.228	0
7290	HIRA	histone cell cycle regulator	17	0.5	0	0	PH	0.177	0.051	0.228	0
5413	SEPT5	septin 5	10	0.5	0	0	PH	0.182	0.056	0.228	0
594855	CPLX3	complexin 3	3	0.5	0	0	PH	0.168	0.044	0.228	0
66036	MTMR9	myotubularin related protein 9	4	0.5	0	0	PH	0.18	0.054	0.228	0
11080	DNAJB4	DnaJ heat shock protein family (Hsp40) member B4	7	0.5	0	0	PH	0.175	0.05	0.228	0
25843	MOB4	MOB family member 4, phocein	35	0.5	0	0	PH	0.185	0.059	0.228	0
6813	STXBP2	syntaxin binding protein 2	6	0.5	0	0	PH	0.179	0.053	0.228	0
5319	PLA2G1B	phospholipase A2 group IB	4	0.5	0	0	PH	0.163	0.04	0.228	0
10210	TOPORS	TOP1 binding arginine/serine rich protein	17	0.5	0	0.5	PH	0.176	0.051	0.228	0
339291	LRRC30	leucine rich repeat containing 30	2	0.5	0	0	PH	0.172	0.047	0.228	0
9648	GCC2	GRIP and coiled-coil domain containing 2	42	0.5	0	0.5	PH	0.183	0.057	0.228	0
51439	FAM8A1	family with sequence similarity 8 member A1	4	0.5	0	0	PH	0.169	0.045	0.228	0
10905	MAN1A2	mannosidase alpha class 1A member 2	26	0.5	0	0	PH	0.182	0.056	0.227	0
5797	PTPRM	protein tyrosine phosphatase receptor type M	5	0.5	0	0	PH	0.169	0.045	0.227	0
79035	NABP2	nucleic acid binding protein 2	76	0.5	0	0	PH	0.185	0.059	0.227	0
10657	KHDRBS1	KH RNA binding domain containing, signal transduction associated 1	34	0.5	0	0.5	PH	0.177	0.052	0.227	0
8914	TIMELESS	timeless circadian regulator	65	0.5	0	0.5	PH	0.189	0.063	0.227	0
9722	NOS1AP	nitric oxide synthase 1 adaptor protein	4	0.5	0	0	PH	0.168	0.045	0.227	0
675	BRCA2	BRCA2 DNA repair associated	95	0.5	0	0	PH	0.19	0.064	0.227	0
56624	ASAH2	N-acylsphingosine amidohydrolase 2	20	0.5	0	0	PH	0.183	0.058	0.227	0
54734	RAB39A	RAB39A, member RAS oncogene family	75	0.5	0	0	PH	0.193	0.067	0.227	0
84893	FBH1	F-box DNA helicase 1	28	0.5	0	0	PH	0.168	0.045	0.226	0
50515	CHST11	carbohydrate sulfotransferase 11	14	0.5	0	0	PH	0.178	0.054	0.226	0
23526	ARHGAP45	Rho GTPase activating protein 45	104	0.5	0	0.5	PH	0.192	0.067	0.226	0
131096	KCNH8	potassium voltage-gated channel subfamily H member 8	3	0.5	0	0	PH	0.165	0.043	0.226	0
100528064	NEDD8-MDP1	NEDD8-MDP1 readthrough	13	0.5	0	0	PH	0.167	0.045	0.225	0
3751	KCND2	potassium voltage-gated channel subfamily D member 2	9	0.5	0	0	PH	0.186	0.062	0.225	0
22839	DLGAP4	DLG associated protein 4	22	0	0.5	0.5	0	0.176	0.053	0.224	0
1638	DCT	dopachrome tautomerase	2	0.5	0	0	PH	0.175	0.052	0.224	0
5783	PTPN13	protein tyrosine phosphatase non-receptor type 13	23	0.5	0	0	PH	0.177	0.054	0.224	0
55568	GALNT10	polypeptide N-acetylgalactosaminyltransferase 10	16	0.5	0.5	0	PH	0.174	0.052	0.223	0
971	CD72	CD72 molecule	11	0.5	0	0	PH	0.167	0.046	0.223	0
6636	SNRPF	small nuclear ribonucleoprotein polypeptide F	289	0.5	0.5	0	PH	0.207	0.084	0.223	0
84725	PLEKHA8	pleckstrin homology domain containing A8	1	0.5	0	0	PH	0.154	0.036	0.223	0
6429	SRSF4	serine and arginine rich splicing factor 4	225	0.5	0.5	0.5	PH	0.194	0.071	0.223	0
6491	STIL	STIL centriolar assembly protein	19	0.5	0	0	PH	0.175	0.054	0.222	0
10599	SLCO1B1	solute carrier organic anion transporter family member 1B1	1	0.5	0	0	PH	0.154	0.036	0.222	0
11137	PWP1	PWP1 homolog, endonuclein	139	0.5	0	0	PH	0.187	0.065	0.222	0
11151	CORO1A	coronin 1A	11	0.5	0	0	PH	0.178	0.057	0.222	0
126006	PCP2	Purkinje cell protein 2	217	0.5	0	0	PH	0.188	0.066	0.221	0
1649	DDIT3	DNA damage inducible transcript 3	15	0.5	0	0	PH	0.177	0.056	0.221	0
65078	RTN4R	reticulon 4 receptor	8	0.5	0	0	PH	0.179	0.058	0.221	0
2802	GOLGA3	golgin A3	9	0.5	0	0.5	PH	0.163	0.044	0.221	0
1303	COL12A1	collagen type XII alpha 1 chain	58	0.5	0	0	PH	0.187	0.066	0.221	0
114818	KLHL29	kelch like family member 29	1	0.5	0.5	0	PH	0.153	0.036	0.221	0
8632	DNAH17	dynein axonemal heavy chain 17	25	0.5	0	0	PH	0.177	0.057	0.22	0
63925	ZNF335	zinc finger protein 335	1	0.5	0	0	PH	0.158	0.04	0.22	0
4661	MYT1	myelin transcription factor 1	7	0.5	0	0	PH	0.165	0.046	0.22	0
84083	ZRANB3	zinc finger RANBP2-type containing 3	2	0.5	0	0	PH	0.155	0.038	0.22	0
55813	UTP6	UTP6 small subunit processome component	207	0.5	0	0	PH	0.189	0.068	0.22	0
151011	SEPT10	septin 10	13	0.5	0	0	PH	0.185	0.065	0.22	0
9772	TMEM94	transmembrane protein 94	1	0.5	0	0	PH	0.168	0.049	0.22	0
54487	DGCR8	DGCR8 microprocessor complex subunit	28	0.5	0	0.5	PH	0.175	0.055	0.22	0
53349	ZFYVE1	zinc finger FYVE-type containing 1	2	0.5	0	0	PH	0.156	0.039	0.219	0
9883	POM121	POM121 transmembrane nucleoporin	138	0.5	0	0	PH	0.193	0.073	0.219	0
2512	FTL	ferritin light chain	128	0.5	0	0	PH	0.195	0.075	0.219	0
10060	ABCC9	ATP binding cassette subfamily C member 9	3	0.5	0	0	PH	0.175	0.056	0.219	0
6653	SORL1	sortilin related receptor 1	1	0.5	0	1	PH	0.153	0.037	0.219	0
319	APOF	apolipoprotein F	2	0.5	0	0	PH	0.162	0.045	0.219	0
90850	ZNF598	zinc finger protein 598	3	0.5	0	0	PH	0.159	0.042	0.219	0
50831	TAS2R3	taste 2 receptor member 3	228	0.5	0	0	PH	0.188	0.069	0.219	0
3185	HNRNPF	heterogeneous nuclear ribonucleoprotein F	202	0.5	0	0	PH	0.194	0.075	0.219	0
3833	KIFC1	kinesin family member C1	106	0.5	0	0	PH	0.187	0.068	0.219	0
7332	UBE2L3	ubiquitin conjugating enzyme E2 L3	26	0.5	0	0	PH	0.173	0.055	0.218	0
2917	GRM7	glutamate metabotropic receptor 7	231	0.5	0.5	0	PH	0.189	0.07	0.218	0
116496	FAM129A	family with sequence similarity 129 member A	1	0.5	0	0	PH	0.155	0.039	0.218	0
256933	NPB	neuropeptide B	229	0.5	0	0	PH	0.188	0.07	0.218	0
51083	GAL	galanin and GMAP prepropeptide	229	0.5	0	0	PH	0.188	0.07	0.218	0
6840	SVIL	supervillin	10	0.5	0	0.5	PH	0.173	0.055	0.217	0
53405	CLIC5	chloride intracellular channel 5	5	0.5	0	0	PH	0.18	0.062	0.217	0
1845	DUSP3	dual specificity phosphatase 3	7	0.5	0	0	PH	0.172	0.055	0.217	0
347733	TUBB2B	tubulin beta 2B class IIb	51	0.5	0	0	PH	0.186	0.068	0.217	0
121457	IKBIP	IKBKB interacting protein	1	0.5	0	0	PH	0.2	0.082	0.217	0
91419	ATP23	ATP23 metallopeptidase and ATP synthase assembly factor homolog	24	0.5	0	0	PH	0.172	0.055	0.217	0
22807	IKZF2	IKAROS family zinc finger 2	1	0.5	0	0	PH	0.174	0.057	0.217	0
6421	SFPQ	splicing factor proline and glutamine rich	38	0.5	0.5	0.5	PH	0.174	0.057	0.217	0
9489	PGS1	phosphatidylglycerophosphate synthase 1	5	0.5	0	0	PH	0.181	0.064	0.216	0
2869	GRK5	G protein-coupled receptor kinase 5	157	0.5	0.5	0	PH	0.188	0.071	0.216	0
51678	MPP6	membrane palmitoylated protein 6	14	0.5	0	0.5	PH	0.168	0.052	0.216	0
9175	MAP3K13	mitogen-activated protein kinase kinase kinase 13	1	0.5	0	0	PH	0.156	0.041	0.216	0
134429	STARD4	StAR related lipid transfer domain containing 4	4	0.5	0	0.5	PH	0.186	0.069	0.216	0
5310	PKD1	polycystin 1, transient receptor potential channel interacting	20	0.5	0	0	PH	0.176	0.059	0.216	0
8777	MPDZ	multiple PDZ domain crumbs cell polarity complex component	3	0.5	0	0	PH	0.166	0.05	0.216	0
2918	GRM8	glutamate metabotropic receptor 8	231	0.5	0	0	PH	0.189	0.072	0.216	0
226	ALDOA	aldolase, fructose-bisphosphate A	150	0.5	0	0	PH	0.203	0.086	0.216	0
54962	TIPIN	TIMELESS interacting protein	53	0.5	0	0	PH	0.181	0.064	0.216	0
4929	NR4A2	nuclear receptor subfamily 4 group A member 2	6	0.5	0	0.5	PH	0.162	0.047	0.216	0
9166	EBAG9	estrogen receptor binding site associated antigen 9	1	0.5	0	0	PH	0.155	0.041	0.216	0
132884	EVC2	EvC ciliary complex subunit 2	10	0.5	0.5	0	PH	0.169	0.053	0.216	0
6187	RPS2	ribosomal protein S2	328	0.5	0	0	PH	0.198	0.082	0.216	0
26751	SH3YL1	SH3 and SYLF domain containing 1	1	0.5	0	0	PH	0.155	0.041	0.216	0
57125	PLXDC1	plexin domain containing 1	1	0.5	0	0	PH	0.163	0.048	0.216	0
9454	HOMER3	homer scaffold protein 3	21	0	0.5	0	0	0.174	0.058	0.215	0
3787	KCNS1	potassium voltage-gated channel modifier subfamily S member 1	3	0.5	0	0	PH	0.165	0.05	0.215	0
64101	LRRC4	leucine rich repeat containing 4	1	0.5	0	0	PH	0.156	0.042	0.215	0
5557	PRIM1	DNA primase subunit 1	80	0.5	0	0	PH	0.187	0.071	0.214	0
11218	DDX20	DEAD-box helicase 20	61	0.5	0	0	PH	0.18	0.064	0.214	0
339231	ARL16	ADP ribosylation factor like GTPase 16	3	0.5	0	0	PH	0.171	0.056	0.214	0
29801	ZDHHC8	zinc finger DHHC-type containing 8	1	0.5	0	0	PH	0.158	0.044	0.214	0
5792	PTPRF	protein tyrosine phosphatase receptor type F	21	0.5	0	0	PH	0.187	0.072	0.214	0
9509	ADAMTS2	ADAM metallopeptidase with thrombospondin type 1 motif 2	48	0.5	0	0	PH	0.185	0.07	0.214	0
375775	PNPLA7	patatin like phospholipase domain containing 7	8	0.5	0	0	PH	0.182	0.067	0.214	0
55133	SRBD1	S1 RNA binding domain 1	1	0.5	0	0	PH	0.157	0.044	0.214	0
84263	HSDL2	hydroxysteroid dehydrogenase like 2	1	0.5	0	0	PH	0.167	0.053	0.213	0
23082	PPRC1	peroxisome proliferator-activated receptor gamma, coactivator-related 1	9	0.5	0	0	PH	0.17	0.056	0.213	0
10785	WDR4	WD repeat domain 4	25	0.5	0	0	PH	0.167	0.053	0.213	0
58517	RBM25	RNA binding motif protein 25	75	0.5	0	0.5	PH	0.185	0.071	0.213	0
57096	RPGRIP1	RPGR interacting protein 1	2	0.5	0	0	PH	0.161	0.048	0.213	0
11095	ADAMTS8	ADAM metallopeptidase with thrombospondin type 1 motif 8	38	0.5	0.5	0	PH	0.182	0.068	0.213	0
22856	CHSY1	chondroitin sulfate synthase 1	11	0.5	1	0	PH	0.177	0.063	0.212	0
91289	LMF2	lipase maturation factor 2	2	0.5	0	0.5	PH	0.181	0.067	0.212	0
23032	USP33	ubiquitin specific peptidase 33	14	0.5	0	0.5	PH	0.174	0.06	0.212	0
10287	RGS19	regulator of G protein signaling 19	14	0.5	0	0	PH	0.166	0.053	0.212	0
57524	CASKIN1	CASK interacting protein 1	1	0.5	0.5	0	PH	0.175	0.061	0.212	0
7150	TOP1	DNA topoisomerase I	14	0.5	0	0	PH	0.171	0.058	0.212	0
51292	GMPR2	guanosine monophosphate reductase 2	24	0.5	0	0	PH	0.181	0.068	0.212	0
649	BMP1	bone morphogenetic protein 1	21	0.5	0	0	PH	0.176	0.063	0.212	0
50839	TAS2R10	taste 2 receptor member 10	228	0.5	0	0	PH	0.188	0.075	0.212	0
54934	KANSL2	KAT8 regulatory NSL complex subunit 2	8	0.5	0	0.5	PH	0.168	0.055	0.212	0
57705	WDFY4	WDFY family member 4	10	0.5	0	0	PH	0.174	0.061	0.212	0
6098	ROS1	ROS proto-oncogene 1, receptor tyrosine kinase	1	0.5	0	0	PH	0.156	0.044	0.212	0
84991	RBM17	RNA binding motif protein 17	176	0.5	0	0.5	PH	0.188	0.075	0.211	0
152006	RNF38	ring finger protein 38	4	0.5	0	0	PH	0.156	0.044	0.211	0
64854	USP46	ubiquitin specific peptidase 46	7	0.5	0	0	PH	0.162	0.05	0.211	0
2690	GHR	growth hormone receptor	31	0.5	0	0	PH	0.177	0.065	0.21	0
10486	CAP2	cyclase associated actin cytoskeleton regulatory protein 2	13	0.5	0	0	PH	0.175	0.063	0.21	0
23189	KANK1	KN motif and ankyrin repeat domains 1	2	0.5	0	0	PH	0.175	0.063	0.21	0
5148	PDE6G	phosphodiesterase 6G	40	0.5	0	0	PH	0.179	0.067	0.21	0
59271	EVA1C	eva-1 homolog C	1	0.5	0.5	0	PH	0.16	0.049	0.21	0
3652	IPP	intracisternal A particle-promoted polypeptide	5	0.5	0	0	PH	0.178	0.066	0.21	0
1431	CS	citrate synthase	90	0.5	0	0.5	PH	0.201	0.091	0.209	0
5890	RAD51B	RAD51 paralog B	65	0.5	0.5	0	PH	0.18	0.069	0.209	0
5803	PTPRZ1	protein tyrosine phosphatase receptor type Z1	3	0.5	1	0	PH	0.168	0.057	0.209	0
10950	BTG3	BTG anti-proliferation factor 3	3	0.5	0	0	PH	0.165	0.054	0.209	0
1594	CYP27B1	cytochrome P450 family 27 subfamily B member 1	3	0.5	0	0	PH	0.184	0.073	0.209	0
6035	RNASE1	ribonuclease A family member 1, pancreatic	1	0.5	0	0	PH	0.185	0.074	0.209	0
11132	CAPN10	calpain 10	2	0.5	0	0	PH	0.162	0.052	0.208	0
147968	CAPN12	calpain 12	2	0.5	0	0	PH	0.162	0.052	0.208	0
25771	TBC1D22A	TBC1 domain family member 22A	1	0.5	0	0.5	PH	0.175	0.064	0.208	0
23450	SF3B3	splicing factor 3b subunit 3	210	0.5	0	0	PH	0.191	0.081	0.208	0
57662	CAMSAP3	calmodulin regulated spectrin associated protein family member 3	7	0.5	0	0	PH	0.168	0.058	0.208	0
10491	CRTAP	cartilage associated protein	50	0.5	0	0	PH	0.179	0.069	0.208	0
7280	TUBB2A	tubulin beta 2A class IIa	53	0.5	0	1	PH	0.187	0.078	0.207	0
111	ADCY5	adenylate cyclase 5	333	0.5	0	0	PH	0.194	0.085	0.207	0
26036	ZNF451	zinc finger protein 451	4	0.5	0	0	PH	0.161	0.052	0.207	0
23283	CSTF2T	cleavage stimulation factor subunit 2 tau variant	192	0.5	0	0.5	PH	0.189	0.081	0.207	0
1312	COMT	catechol-O-methyltransferase	19	0.5	0	0	PH	0.184	0.075	0.207	0
5118	PCOLCE	procollagen C-endopeptidase enhancer	17	0.5	0	0	PH	0.174	0.065	0.206	0
64924	SLC30A5	solute carrier family 30 member 5	5	0.5	0	0.5	PH	0.175	0.066	0.206	0
121227	LRIG3	leucine rich repeats and immunoglobulin like domains 3	2	0.5	0	0	PH	0.164	0.055	0.206	0
4791	NFKB2	nuclear factor kappa B subunit 2	101	0.5	0	0	PH	0.19	0.082	0.206	0
23338	JADE2	jade family PHD finger 2	4	0.5	0	0	PH	0.166	0.057	0.206	0
4543	MTNR1A	melatonin receptor 1A	229	0.5	0	0	PH	0.188	0.081	0.206	0
283869	NPW	neuropeptide W	229	0.5	0	0	PH	0.188	0.081	0.206	0
26289	AK5	adenylate kinase 5	32	0.5	0	0.5	PH	0.18	0.073	0.205	0
84942	WDR73	WD repeat domain 73	2	0.5	0	1	PH	0.157	0.049	0.205	0
10531	PITRM1	pitrilysin metallopeptidase 1	19	0.5	1	0	PH	0.175	0.067	0.205	0
29082	CHMP4A	charged multivesicular body protein 4A	40	0.5	0	0	PH	0.179	0.072	0.205	0
80233	FAAP100	FA core complex associated protein 100	53	0.5	0	0	PH	0.18	0.073	0.205	0
1993	ELAVL2	ELAV like RNA binding protein 2	176	0.5	0	0	PH	0.188	0.082	0.204	0
5036	PA2G4	proliferation-associated 2G4	161	0.5	0	0.5	PH	0.192	0.087	0.204	0
2997	GYS1	glycogen synthase 1	21	0.5	0	0	PH	0.174	0.067	0.204	0
10044	SH2D3C	SH2 domain containing 3C	2	0.5	0	0	PH	0.165	0.058	0.204	0
26166	RGS22	regulator of G protein signaling 22	4	0.5	0	0	PH	0.155	0.049	0.204	0
8029	CUBN	cubilin	6	0.5	0	0	PH	0.17	0.064	0.203	0
2010	EMD	emerin	10	0.5	0	0	PH	0.179	0.073	0.203	0
57697	FANCM	FA complementation group M	48	0.5	0	0	PH	0.179	0.073	0.203	0
84305	PYM1	PYM homolog 1, exon junction complex associated factor	16	0.5	0	0	PH	0.165	0.059	0.203	0
169522	KCNV2	potassium voltage-gated channel modifier subfamily V member 2	3	0.5	0	0	PH	0.165	0.059	0.203	0
6000	RGS7	regulator of G protein signaling 7	18	0.5	0	0	PH	0.167	0.061	0.203	0
93100	NAPRT	nicotinate phosphoribosyltransferase	103	0.5	0	0	PH	0.189	0.085	0.203	0
54822	TRPM7	transient receptor potential cation channel subfamily M member 7	4	0.5	0	0	PH	0.187	0.082	0.203	0
6487	ST3GAL3	ST3 beta-galactoside alpha-2,3-sialyltransferase 3	29	0.5	0	0	PH	0.183	0.078	0.203	0
3945	LDHB	lactate dehydrogenase B	13	0.5	0	0.5	PH	0.171	0.065	0.203	0
4155	MBP	myelin basic protein	3	0.5	0	0.5	PH	0.165	0.059	0.202	0
80031	SEMA6D	semaphorin 6D	3	0.5	0	0	PH	0.161	0.055	0.202	0
4189	DNAJB9	DnaJ heat shock protein family (Hsp40) member B9	2	0.5	0.5	0	PH	0.164	0.059	0.202	0
7416	VDAC1	voltage dependent anion channel 1	75	0.5	0	0	PH	0.193	0.09	0.202	0
3105	HLA-A	major histocompatibility complex, class I, A	167	0.5	0	0	PH	0.19	0.087	0.201	0
2647	BLOC1S1	biogenesis of lysosomal organelles complex 1 subunit 1	18	0.5	0.5	0	PH	0.181	0.077	0.201	0
23266	ADGRL2	adhesion G protein-coupled receptor L2	4	0.5	0	0	PH	0.164	0.059	0.201	0
52	ACP1	acid phosphatase 1	6	0.5	0	0	PH	0.164	0.059	0.201	0
8732	RNGTT	RNA guanylyltransferase and 5'-phosphatase	29	0.5	0	0	PH	0.167	0.063	0.201	0
92799	SHKBP1	SH3KBP1 binding protein 1	2	0.5	0	0	PH	0.174	0.07	0.201	0
9991	PTBP3	polypyrimidine tract binding protein 3	5	0.5	0	0.5	PH	0.165	0.061	0.201	0
506	ATP5F1B	ATP synthase F1 subunit beta	132	0.5	0.5	0	PH	0.195	0.094	0.201	0
6773	STAT2	signal transducer and activator of transcription 2	86	0.5	0	0	PH	0.186	0.083	0.201	0
26094	DCAF4	DDB1 and CUL4 associated factor 4	60	0.5	0	0	PH	0.174	0.07	0.2	0
4097	MAFG	MAF bZIP transcription factor G	10	0.5	0.5	0	PH	0.171	0.067	0.2	0
5662	PSD	pleckstrin and Sec7 domain containing	1	0.5	0	0	PH	0.155	0.051	0.2	0
2006	ELN	elastin	8	0.5	0	0	PH	0.173	0.07	0.2	0
23057	NMNAT2	nicotinamide nucleotide adenylyltransferase 2	16	0.5	0	0	PH	0.171	0.068	0.2	0
205428	DIPK2A	divergent protein kinase domain 2A	35	0.5	0	0.5	PH	0.17	0.067	0.2	0
10563	CXCL13	C-X-C motif chemokine ligand 13	228	0.5	0	0	PH	0.188	0.087	0.2	0
10106	CTDSP2	CTD small phosphatase 2	4	0.5	0	0	PH	0.159	0.056	0.2	0
374378	GALNT18	polypeptide N-acetylgalactosaminyltransferase 18	16	0.5	0	0	PH	0.174	0.071	0.2	0
977	CD151	CD151 molecule (Raph blood group)	8	0.5	0.5	0	PH	0.164	0.061	0.2	0
6143	RPL19	ribosomal protein L19	241	0.5	0	0	PH	0.187	0.086	0.199	0
6134	RPL10	ribosomal protein L10	214	0.5	0	0.5	PH	0.185	0.084	0.199	0
89927	BMERB1	bMERB domain containing 1	3	0.5	0	0	PH	0.156	0.053	0.199	0
64848	YTHDC2	YTH domain containing 2	9	0.5	0	0	PH	0.161	0.058	0.199	0
5145	PDE6A	phosphodiesterase 6A	34	0.5	0	0	PH	0.173	0.071	0.198	0
10171	RCL1	RNA terminal phosphate cyclase like 1	144	0.5	0	0	PH	0.179	0.078	0.198	0
9933	PUM3	pumilio RNA binding family member 3	164	0.5	0	0	PH	0.188	0.088	0.198	0
64409	GALNT17	polypeptide N-acetylgalactosaminyltransferase 17	16	0.5	0.5	0	PH	0.174	0.073	0.197	0
10402	ST3GAL6	ST3 beta-galactoside alpha-2,3-sialyltransferase 6	28	0.5	0	0.5	PH	0.177	0.077	0.197	0
5506	PPP1R3A	protein phosphatase 1 regulatory subunit 3A	11	0.5	0	0	PH	0.169	0.068	0.197	0
10720	UGT2B11	UDP glucuronosyltransferase family 2 member B11	6	0.5	0	0	PH	0.184	0.085	0.197	0
2515	ADAM2	ADAM metallopeptidase domain 2	11	0.5	0.5	0	PH	0.171	0.072	0.196	0
4486	MST1R	macrophage stimulating 1 receptor	12	0.5	0	0	PH	0.166	0.066	0.196	0
50614	GALNT9	polypeptide N-acetylgalactosaminyltransferase 9	16	0.5	0.5	0	PH	0.174	0.075	0.195	0
4987	OPRL1	opioid related nociceptin receptor 1	229	0.5	0	0	PH	0.188	0.092	0.195	0
8803	SUCLA2	succinate-CoA ligase ADP-forming beta subunit	33	0.5	0	0	PH	0.179	0.081	0.195	0
5531	PPP4C	protein phosphatase 4 catalytic subunit	13	0.5	0	0	PH	0.173	0.074	0.195	0
10607	TBL3	transducin beta like 3	222	0.5	0	0	PH	0.192	0.097	0.195	0
8630	HSD17B6	hydroxysteroid 17-beta dehydrogenase 6	33	0.5	0	0	PH	0.175	0.078	0.194	0
7314	UBB	ubiquitin B	1169	0	0	0	0	0.18	0.084	0.194	0
259232	NALCN	sodium leak channel, non-selective	2	0	0	0	0	0.198	0.105	0.194	0
5959	RDH5	retinol dehydrogenase 5	11	0.5	0	0	PH	0.171	0.074	0.194	0
55697	VAC14	Vac14, PIKFYVE complex component	5	0.5	1	0.5	PH	0.168	0.07	0.193	0
84168	ANTXR1	ANTXR cell adhesion molecule 1	2	0.5	0	0	PH	0.177	0.081	0.193	0
23306	NEMP1	nuclear envelope integral membrane protein 1	5	0.5	0	0	PH	0.163	0.065	0.193	0
1825	DSC3	desmocollin 3	34	0.5	0	0	PH	0.176	0.08	0.193	0
3039	HBA1	hemoglobin subunit alpha 1	43	0.5	0	0	PH	0.172	0.075	0.193	0
1830	DSG3	desmoglein 3	35	0.5	0	0	PH	0.177	0.081	0.193	0
1657	DMXL1	Dmx like 1	3	0.5	0	1	PH	0.16	0.062	0.193	0
124056	NOXO1	NADPH oxidase organizer 1	8	0.5	0	0	PH	0.165	0.069	0.192	0
119548	PNLIPRP3	pancreatic lipase related protein 3	12	0.5	0	0	PH	0.169	0.074	0.191	0
6342	SCP2	sterol carrier protein 2	67	0.5	0	0	PH	0.185	0.093	0.191	0
445	ASS1	argininosuccinate synthase 1	24	0.5	0.5	0	PH	0.178	0.085	0.191	0
2298	FOXD4	forkhead box D4	5	0.5	0	0	PH	0.164	0.069	0.191	0
3069	HDLBP	high density lipoprotein binding protein	12	0.5	1	0	PH	0.168	0.074	0.19	0
53	ACP2	acid phosphatase 2, lysosomal	6	0.5	0	0	PH	0.17	0.076	0.19	0
5879	RAC1	Rac family small GTPase 1	502	0	0	0	0	0.194	0.105	0.19	0
26524	LATS2	large tumor suppressor kinase 2	20	0.5	0	0	PH	0.171	0.078	0.19	0
24140	FTSJ1	FtsJ RNA 2'-O-methyltransferase 1	3	0.5	0	0.5	PH	0.16	0.066	0.189	0
6767	ST13	ST13 Hsp70 interacting protein	17	0.5	0	1	PH	0.166	0.073	0.189	0
6768	ST14	suppression of tumorigenicity 14	3	0.5	0	0	PH	0.164	0.071	0.189	0
9221	NOLC1	nucleolar and coiled-body phosphoprotein 1	91	0.5	0	0	PH	0.181	0.09	0.189	0
285220	EPHA6	EPH receptor A6	35	0.5	0	0	PH	0.175	0.084	0.189	0
11329	STK38	serine/threonine kinase 38	1	0.5	0	0.5	PH	0.157	0.063	0.189	0
6733	SRPK2	SRSF protein kinase 2	4	0.5	1	0.5	PH	0.158	0.064	0.188	0
9615	GDA	guanine deaminase	8	0.5	0	0	PH	0.17	0.078	0.188	0
7165	TPD52L2	TPD52 like 2	5	0.5	0	0	PH	0.171	0.079	0.188	0
58512	DLGAP3	DLG associated protein 3	22	0	0	0	0	0.171	0.079	0.188	0
57409	MIF4GD	MIF4G domain containing	6	0.5	0	0	PH	0.164	0.072	0.188	0
51177	PLEKHO1	pleckstrin homology domain containing O1	1	0.5	0	0	PH	0.154	0.06	0.188	0
114049	BUD23	BUD23 rRNA methyltransferase and ribosome maturation factor	65	0.5	0	0	PH	0.169	0.078	0.187	0
2778	GNAS	GNAS complex locus	180	0.5	0.5	0.5	PH	0.187	0.099	0.187	0
3040	HBA2	hemoglobin subunit alpha 2	42	0.5	0	0	PH	0.171	0.08	0.187	0
6175	RPLP0	ribosomal protein lateral stalk subunit P0	244	0.5	0	0	PH	0.189	0.102	0.187	0
23478	SEC11A	SEC11 homolog A, signal peptidase complex subunit	104	0.5	0	0	PH	0.171	0.081	0.187	0
55015	PRPF39	pre-mRNA processing factor 39	23	0.5	0	0.5	PH	0.17	0.08	0.187	0
23542	MAPK8IP2	mitogen-activated protein kinase 8 interacting protein 2	8	0.5	0.5	0	PH	0.165	0.074	0.186	0
8886	DDX18	DEAD-box helicase 18	134	0.5	0.5	0	PH	0.182	0.095	0.186	0
6233	RPS27A	ribosomal protein S27a	1393	0	0	0	0	0.181	0.093	0.186	0
51081	MRPS7	mitochondrial ribosomal protein S7	259	0.5	0	0	PH	0.179	0.091	0.186	0
998	CDC42	cell division cycle 42	484	0	0	0	0	0.172	0.083	0.186	0
7458	EIF4H	eukaryotic translation initiation factor 4H	118	0.5	0	0	PH	0.178	0.09	0.186	0
283989	TSEN54	tRNA splicing endonuclease subunit 54	7	0.5	0	0.5	PH	0.161	0.071	0.185	0
5787	PTPRB	protein tyrosine phosphatase receptor type B	117	0.5	0	0	PH	0.18	0.094	0.185	0
90121	TSR2	TSR2 ribosome maturation factor	75	0.5	0	0.5	PH	0.171	0.083	0.185	0
2539	G6PD	glucose-6-phosphate dehydrogenase	42	0.5	0	0	PH	0.179	0.093	0.184	0
537	ATP6AP1	ATPase H+ transporting accessory protein 1	54	0.5	0	0	PH	0.178	0.093	0.184	0
10220	GDF11	growth differentiation factor 11	1	0.5	0	0	PH	0.158	0.069	0.184	0
2671	GFER	growth factor, augmenter of liver regeneration	23	0.5	0	0	PH	0.169	0.082	0.184	0
2583	B4GALNT1	beta-1,4-N-acetyl-galactosaminyltransferase 1	9	0.5	0	0	PH	0.168	0.081	0.183	0
7051	TGM1	transglutaminase 1	53	0.5	0	0	PH	0.175	0.09	0.183	0
5214	PFKP	phosphofructokinase, platelet	19	0.5	0	0	PH	0.167	0.08	0.183	0
54737	MPHOSPH8	M-phase phosphoprotein 8	34	0.5	0	0	PH	0.171	0.085	0.183	0
51141	INSIG2	insulin induced gene 2	4	0.5	0	0	PH	0.166	0.079	0.183	0
9456	HOMER1	homer scaffold protein 1	22	0	0	0	0	0.173	0.088	0.182	0
6002	RGS12	regulator of G protein signaling 12	4	0.5	0.5	0	PH	0.155	0.067	0.182	0
6821	SUOX	sulfite oxidase	6	0.5	0	0	PH	0.166	0.08	0.182	0
10587	TXNRD2	thioredoxin reductase 2	10	0.5	0	0	PH	0.171	0.086	0.182	0
6299	SALL1	spalt like transcription factor 1	4	0.5	0	0	PH	0.159	0.072	0.182	0
5069	PAPPA	pappalysin 1	7	0.5	0	0	PH	0.161	0.075	0.181	0
23347	SMCHD1	structural maintenance of chromosomes flexible hinge domain containing 1	5	0.5	0	0.5	PH	0.16	0.075	0.18	0
23339	VPS39	VPS39 subunit of HOPS complex	8	0.5	0	0	PH	0.165	0.081	0.18	0
696	BTN1A1	butyrophilin subfamily 1 member A1	2	0.5	0	0	PH	0.159	0.074	0.18	0
6734	SRPRA	SRP receptor subunit alpha	106	0.5	0	0	PH	0.171	0.089	0.18	0
51102	MECR	mitochondrial trans-2-enoyl-CoA reductase	22	0.5	0	0	PH	0.177	0.097	0.18	0
60625	DHX35	DEAH-box helicase 35	32	0.5	0.5	0	PH	0.166	0.083	0.179	0
7122	CLDN5	claudin 5	23	0.5	0	0	PH	0.165	0.082	0.179	0
53833	IL20RB	interleukin 20 receptor subunit beta	10	0.5	0	0	PH	0.167	0.085	0.179	0
4724	NDUFS4	NADH:ubiquinone oxidoreductase subunit S4	93	0.5	0	0	PH	0.168	0.086	0.179	0
10200	MPHOSPH6	M-phase phosphoprotein 6	124	0.5	0	0	PH	0.176	0.096	0.179	0
9997	SCO2	SCO cytochrome c oxidase assembly protein 2	16	0.5	0	0	PH	0.169	0.088	0.178	0
51234	EMC4	ER membrane protein complex subunit 4	11	0.5	0	0	PH	0.168	0.088	0.178	0
51567	TDP2	tyrosyl-DNA phosphodiesterase 2	16	0.5	0	0.5	PH	0.163	0.082	0.177	0
23199	GSE1	Gse1 coiled-coil protein	4	0.5	0	0.5	PH	0.161	0.079	0.177	0
280	AMY2B	amylase alpha 2B (pancreatic)	6	0.5	0	0.5	PH	0.164	0.083	0.177	0
3656	IRAK2	interleukin 1 receptor associated kinase 2	39	0.5	0	0	PH	0.173	0.094	0.177	0
27000	DNAJC2	DnaJ heat shock protein family (Hsp40) member C2	18	0.5	0	0	PH	0.163	0.083	0.177	0
9173	IL1RL1	interleukin 1 receptor like 1	6	0.5	0	0	PH	0.161	0.08	0.176	0
8567	MADD	MAP kinase activating death domain	20	0.5	0	0	PH	0.17	0.093	0.176	0
147923	ZNF420	zinc finger protein 420	5	0.5	0	1	PH	0.168	0.09	0.175	0
1890	TYMP	thymidine phosphorylase	18	0.5	0	0.5	PH	0.168	0.091	0.175	0
4141	MARS	methionyl-tRNA synthetase	29	0.5	0	0	PH	0.167	0.09	0.175	0
89932	PAPLN	papilin, proteoglycan like sulfated glycoprotein	1	0.5	0	0	PH	0.154	0.073	0.175	0
80007	C10orf88	chromosome 10 open reading frame 88	1	0	0	0	0	0.151	0.07	0.174	0
342371	ATXN1L	ataxin 1 like	2	0	1	0	0	0.183	0.112	0.174	0
221662	RBM24	RNA binding motif protein 24	3	0	0	0	0	0.184	0.113	0.174	0
6991	TCTE3	t-complex-associated-testis-expressed 3	38	0.5	0	0	PH	0.166	0.09	0.174	0
283093	OR4C12	olfactory receptor family 4 subfamily C member 12	14	0.5	0	0	PH	0.155	0.076	0.174	0
6171	RPL41	ribosomal protein L41	31	0.5	0	0	PH	0.165	0.089	0.173	0
100131801	PET100	PET100 homolog	1	0.5	0	0	PH	0.152	0.073	0.173	0
54520	CCDC93	coiled-coil domain containing 93	10	0.5	0	0	PH	0.159	0.081	0.173	0
1723	DHODH	dihydroorotate dehydrogenase (quinone)	12	0.5	0	0	PH	0.162	0.086	0.173	0
23195	MDN1	midasin AAA ATPase 1	11	0.5	0	0	PH	0.159	0.082	0.173	0
221823	PRPS1L1	phosphoribosyl pyrophosphate synthetase 1 like 1	15	0.5	0	0	PH	0.168	0.094	0.172	0
4666	NACA	nascent polypeptide associated complex subunit alpha	67	0.5	0	0	PH	0.168	0.094	0.172	0
133121	ENPP6	ectonucleotide pyrophosphatase/phosphodiesterase 6	5	0.5	0	0	PH	0.176	0.105	0.172	0
682	BSG	basigin (Ok blood group)	29	0	0	0	0	0.169	0.097	0.172	0
283871	PGP	phosphoglycolate phosphatase	4	0.5	0	0	PH	0.159	0.084	0.171	0
2557	GABRA4	gamma-aminobutyric acid type A receptor alpha4 subunit	17	0	0	0	0	0.156	0.08	0.171	0
55739	NAXD	NAD(P)HX dehydratase	5	0.5	1	0	PH	0.16	0.086	0.171	0
23660	ZKSCAN5	zinc finger with KRAB and SCAN domains 5	4	0.5	0	0	PH	0.157	0.082	0.171	0
8893	EIF2B5	eukaryotic translation initiation factor 2B subunit epsilon	9	0.5	0	0	PH	0.162	0.088	0.171	0
10865	ARID5A	AT-rich interaction domain 5A	1	0	0	0	0	0.174	0.105	0.17	0
2559	GABRA6	gamma-aminobutyric acid type A receptor alpha6 subunit	17	0	0	0	0	0.156	0.081	0.17	0
441639	OR9K2	olfactory receptor family 9 subfamily K member 2	14	0.5	0	0	PH	0.155	0.08	0.17	0
8326	FZD9	frizzled class receptor 9	22	0.5	0	0	PH	0.167	0.097	0.17	0
27020	NPTN	neuroplastin	13	0	0.5	0.5	0	0.157	0.083	0.169	0
51181	DCXR	dicarbonyl and L-xylulose reductase	4	0.5	0	0.5	PH	0.162	0.09	0.169	0
2555	GABRA2	gamma-aminobutyric acid type A receptor alpha2 subunit	20	0	0	0	0	0.164	0.094	0.169	0
146310	RNF151	ring finger protein 151	3	0.5	0	0	PH	0.168	0.099	0.169	0
5271	SERPINB8	serpin family B member 8	5	0.5	0	0.5	PH	0.163	0.093	0.168	0
84527	ZNF559	zinc finger protein 559	1	0.5	0	0.5	PH	0.154	0.081	0.168	0
51163	DBR1	debranching RNA lariats 1	2	0.5	0	0	PH	0.153	0.08	0.168	0
9455	HOMER2	homer scaffold protein 2	22	0	0	0.5	0	0.171	0.104	0.168	0
83729	INHBE	inhibin subunit beta E	10	0.5	0	0	PH	0.164	0.095	0.168	0
8220	ESS2	ess-2 splicing factor homolog	2	0.5	0	0	PH	0.154	0.082	0.167	0
988	CDC5L	cell division cycle 5 like	586	0	0.5	0	0	0.164	0.096	0.167	0
6648	SOD2	superoxide dismutase 2	29	0.5	0	0	PH	0.171	0.106	0.167	0
4707	NDUFB1	NADH:ubiquinone oxidoreductase subunit B1	68	0.5	0	0	PH	0.164	0.096	0.167	0
55657	ZNF692	zinc finger protein 692	1	0.5	0	0	PH	0.154	0.083	0.166	0
1468	SLC25A10	solute carrier family 25 member 10	25	0.5	0	0	PH	0.157	0.087	0.166	0
2554	GABRA1	gamma-aminobutyric acid type A receptor alpha1 subunit	19	0	0	0	0	0.157	0.087	0.166	0
54984	PINX1	PIN2 (TERF1) interacting telomerase inhibitor 1	60	0.5	0	0	PH	0.168	0.105	0.165	0
152687	ZNF595	zinc finger protein 595	1	0.5	0	0	PH	0.154	0.085	0.165	0
391189	OR11L1	olfactory receptor family 11 subfamily L member 1	14	0.5	1	0	PH	0.155	0.087	0.164	0
387	RHOA	ras homolog family member A	431	0	0	0.5	0	0.156	0.088	0.164	0
2560	GABRB1	gamma-aminobutyric acid type A receptor beta1 subunit	15	0	0	0	0	0.156	0.089	0.164	0
26013	L3MBTL1	L3MBTL histone methyl-lysine binding protein 1	16	0.5	0	0	PH	0.163	0.098	0.164	0
342132	ZNF774	zinc finger protein 774	1	0.5	0	0	PH	0.154	0.086	0.164	0
7311	UBA52	ubiquitin A-52 residue ribosomal protein fusion product 1	1424	0	0	0	0	0.178	0.12	0.164	0
3017	HIST1H2BD	histone cluster 1 H2B family member d	391	0	0.5	0	0	0.146	0.075	0.164	0
83401	ELOVL3	ELOVL fatty acid elongase 3	1	0.5	0	0	PH	0.157	0.09	0.164	0
6182	MRPL12	mitochondrial ribosomal protein L12	101	0.5	0	0	PH	0.16	0.096	0.163	0
55879	GABRQ	gamma-aminobutyric acid type A receptor theta subunit	13	0	0	0	0	0.157	0.091	0.163	0
219858	OR8B12	olfactory receptor family 8 subfamily B member 12	14	0.5	0	0	PH	0.155	0.089	0.163	0
339559	ZFP69	ZFP69 zinc finger protein	1	0.5	0	0	PH	0.154	0.088	0.163	0
341418	OR6C4	olfactory receptor family 6 subfamily C member 4	14	0.5	0	0	PH	0.155	0.09	0.162	0
9924	PAN2	poly(A) specific ribonuclease subunit PAN2	9	0.5	0	0	PH	0.16	0.098	0.161	0
85236	HIST1H2BK	histone cluster 1 H2B family member k	424	0	0	0	0	0.145	0.077	0.161	0
57669	EPB41L5	erythrocyte membrane protein band 4.1 like 5	13	0	0.5	0	0	0.147	0.081	0.161	0
170506	DHX36	DEAH-box helicase 36	3	0.5	0	0	PH	0.156	0.093	0.161	0
155368	METTL27	methyltransferase like 27	9	0.5	0	0	PH	0.156	0.094	0.16	0
51385	ZNF589	zinc finger protein 589	1	0.5	0.5	0.5	PH	0.154	0.091	0.16	0
63897	HEATR6	HEAT repeat containing 6	10	0.5	0	0	PH	0.157	0.097	0.159	0
3885	KRT34	keratin 34	53	0.5	0	0	PH	0.155	0.094	0.159	0
1337	COX6A1	cytochrome c oxidase subunit 6A1	26	0.5	0	0	PH	0.16	0.103	0.158	0
2561	GABRB2	gamma-aminobutyric acid type A receptor beta2 subunit	15	0	0.5	0	0	0.156	0.097	0.158	0
8349	HIST2H2BE	histone cluster 2 H2B family member e	403	0	0	0	0	0.142	0.077	0.158	0
654254	ZNF732	zinc finger protein 732	1	0.5	0	0	PH	0.154	0.094	0.158	0
121130	OR10P1	olfactory receptor family 10 subfamily P member 1	14	0.5	0	0	PH	0.155	0.096	0.158	0
81050	OR5AC2	olfactory receptor family 5 subfamily AC member 2	14	0.5	0	0	PH	0.155	0.096	0.158	0
390275	OR8A1	olfactory receptor family 8 subfamily A member 1	14	0.5	0	0	PH	0.155	0.097	0.157	0
8342	HIST1H2BM	histone cluster 1 H2B family member m	388	0	0	0	0	0.145	0.082	0.157	0
2037	EPB41L2	erythrocyte membrane protein band 4.1 like 2	14	0	0.5	0	0	0.149	0.09	0.156	0
64793	CEP85	centrosomal protein 85	2	0	0	0	0	0.146	0.087	0.155	0
8970	HIST1H2BJ	histone cluster 1 H2B family member j	426	0	0	0	0	0.145	0.086	0.154	0
128368	OR10Z1	olfactory receptor family 10 subfamily Z member 1	14	0.5	0	0	PH	0.155	0.101	0.154	0
3018	HIST1H2BB	histone cluster 1 H2B family member b	415	0	0	0	0	0.144	0.085	0.154	0
285175	UNC80	unc-80 homolog, NALCN channel complex subunit	3	0	0	0.5	0	0.178	0.136	0.154	0
23136	EPB41L3	erythrocyte membrane protein band 4.1 like 3	13	0	0	0	0	0.149	0.093	0.154	0
865	CBFB	core-binding factor subunit beta	203	0	0	0.5	0	0.148	0.091	0.154	0
8338	HIST2H2AC	histone cluster 2 H2A family member c	369	0	0	0	0	0.144	0.086	0.153	0
84717	HDGFL2	HDGF like 2	1	0	0	0	0	0.156	0.105	0.153	0
80324	PUS1	pseudouridine synthase 1	2	0.5	0	0	PH	0.153	0.1	0.153	0
8348	HIST1H2BO	histone cluster 1 H2B family member o	395	0	0	0	0	0.145	0.09	0.151	0
6310	ATXN1	ataxin 1	3	0	0	0	0	0.167	0.124	0.151	0
808	CALM3	calmodulin 3	72	0	0	0	0	0.138	0.081	0.15	0
255403	ZNF718	zinc finger protein 718	1	0.5	0	0	PH	0.154	0.106	0.15	0
8334	HIST1H2AC	histone cluster 1 H2A family member c	388	0	0	0	0	0.141	0.088	0.149	0
3195	TLX1	T cell leukemia homeobox 1	2	0	0	0	0	0.15	0.101	0.149	0
8340	HIST1H2BL	histone cluster 1 H2B family member l	392	0	0	0	0	0.144	0.093	0.149	0
8331	HIST1H2AJ	histone cluster 1 H2A family member j	361	0	0	0	0	0.142	0.09	0.149	0
3013	HIST1H2AD	histone cluster 1 H2A family member d	381	0	0	0.5	0	0.142	0.09	0.148	0
7157	TP53	tumor protein p53	451	0	0	0	0	0.149	0.101	0.148	0
8345	HIST1H2BH	histone cluster 1 H2B family member h	393	0	0	0	0	0.145	0.095	0.148	0
3014	H2AFX	H2A histone family member X	358	0	0	0	0	0.137	0.085	0.147	0
255626	HIST1H2BA	histone cluster 1 H2B family member a	419	0	0	0	0	0.147	0.1	0.147	0
3015	H2AFZ	H2A histone family member Z	322	0	0	0	0	0.135	0.081	0.147	0
5566	PRKACA	protein kinase cAMP-activated catalytic subunit alpha	336	0	0	0	0	0.136	0.086	0.145	0
5594	MAPK1	mitogen-activated protein kinase 1	446	0	0	0.5	0	0.137	0.087	0.145	0
144577	C12orf66	chromosome 12 open reading frame 66	5	0	0	0	0	0.133	0.082	0.144	0
94239	H2AFV	H2A histone family member V	303	0	0.5	0	0	0.131	0.079	0.144	0
10368	CACNG3	calcium voltage-gated channel auxiliary subunit gamma 3	64	0	0	0	0	0.13	0.078	0.144	0
8341	HIST1H2BN	histone cluster 1 H2B family member n	400	0	0	0	0	0.145	0.103	0.143	0
801	CALM1	calmodulin 1	91	0	0	0.5	0	0.135	0.087	0.143	0
2566	GABRG2	gamma-aminobutyric acid type A receptor gamma2 subunit	14	0	0	0	0	0.139	0.096	0.141	0
10369	CACNG2	calcium voltage-gated channel auxiliary subunit gamma 2	65	0	0	0	0	0.135	0.091	0.141	0
1387	CREBBP	CREB binding protein	420	0	0	1	0	0.14	0.1	0.14	0
805	CALM2	calmodulin 2	71	0	0.5	0	0	0.138	0.099	0.139	0
102724334	LOC102724334	histone H2B type F-S-like	358	0	0	0	0	0.137	0.097	0.139	0
5568	PRKACG	protein kinase cAMP-activated catalytic subunit gamma	209	0	0	0	0	0.116	0.067	0.137	0
8573	CASK	calcium/calmodulin dependent serine protein kinase	42	0	0	0	0	0.129	0.088	0.137	0
389	RHOC	ras homolog family member C	187	0	0	0	0	0.128	0.089	0.135	0
6714	SRC	SRC proto-oncogene, non-receptor tyrosine kinase	371	0	0	0	0	0.134	0.099	0.135	0
54145	H2BFS	H2B histone family member S	358	0	0	0	0	0.137	0.104	0.134	0
55766	H2AFJ	H2A histone family member J	335	0	0	0	0	0.13	0.094	0.134	0
100506403	LOC100506403	uncharacterized LOC100506403	162	0	0	0	0	0.122	0.08	0.133	0
388	RHOB	ras homolog family member B	181	0	0	0	0	0.131	0.096	0.133	0
3265	HRAS	HRas proto-oncogene, GTPase	343	0	0	0	0	0.126	0.088	0.133	0
861	RUNX1	runt related transcription factor 1	162	0	0.5	0.5	0	0.122	0.082	0.132	0
59283	CACNG8	calcium voltage-gated channel auxiliary subunit gamma 8	64	0	0	0	0	0.13	0.097	0.132	0
474382	H2AFB1	H2A histone family member B1	328	0	0	0	0	0.131	0.1	0.131	0
5880	RAC2	Rac family small GTPase 2	216	0	0	0	0	0.131	0.1	0.131	0
5295	PIK3R1	phosphoinositide-3-kinase regulatory subunit 1	492	0	0	0.5	0	0.124	0.088	0.13	0
6520	SLC3A2	solute carrier family 3 member 2	10	0	0	0	0	0.137	0.112	0.13	0
2534	FYN	FYN proto-oncogene, Src family tyrosine kinase	290	0	0.5	1	0	0.117	0.079	0.129	0
5931	RBBP7	RB binding protein 7, chromatin remodeling factor	306	0	0	0	0	0.122	0.089	0.128	0
3845	KRAS	KRAS proto-oncogene, GTPase	278	0	0.5	0	0	0.12	0.086	0.127	0
5350	PLN	phospholamban	31	0	0	0.5	0	0.127	0.1	0.127	0
1119	CHKA	choline kinase alpha	9	0	0	0	0	0.121	0.089	0.127	0
55846	ITFG2	integrin alpha FG-GAP repeat containing 2	5	0	1	0	0	0.125	0.098	0.126	0
4842	NOS1	nitric oxide synthase 1	65	0	0	0	0	0.119	0.087	0.126	0
5027	P2RX7	purinergic receptor P2X 7	7	0	0.5	0.5	0	0.131	0.11	0.126	0
162466	PHOSPHO1	phosphoethanolamine/phosphocholine phosphatase	9	0	0.5	0	0	0.121	0.091	0.126	0
5290	PIK3CA	phosphatidylinositol-4,5-bisphosphate 3-kinase catalytic subunit alpha	486	0	0	0	0	0.12	0.09	0.125	0
2099	ESR1	estrogen receptor 1	228	0	0	0	0	0.117	0.087	0.125	0
60	ACTB	actin beta	259	0	0	0	0	0.121	0.093	0.125	0
3320	HSP90AA1	heat shock protein 90 alpha family class A member 1	326	0	0	0	0	0.117	0.087	0.124	0
7329	UBE2I	ubiquitin conjugating enzyme E2 I	289	0	0.5	0	0	0.123	0.098	0.124	0
132141	IQCF1	IQ motif containing F1	2	0	0	0	0	0.127	0.107	0.123	0
999	CDH1	cadherin 1	132	0	0	0.5	0	0.113	0.081	0.123	0
774	CACNA1B	calcium voltage-gated channel subunit alpha1 B	37	0	1	0	0	0.11	0.077	0.123	0
4897	NRCAM	neuronal cell adhesion molecule	33	0	0	0	0	0.111	0.078	0.123	0
50943	FOXP3	forkhead box P3	16	0	0	0	0	0.123	0.101	0.122	0
6256	RXRA	retinoid X receptor alpha	238	0	0.5	0.5	0	0.114	0.087	0.121	0
5430	POLR2A	RNA polymerase II subunit A	499	0	0	0.5	0	0.119	0.095	0.121	0
23433	RHOQ	ras homolog family member Q	164	0	0	0.5	0	0.115	0.089	0.121	0
23334	SZT2	SZT2 subunit of KICSTOR complex	15	0	0	0	0	0.112	0.085	0.12	0
5058	PAK1	p21 (RAC1) activated kinase 1	154	0	0	0	0	0.109	0.08	0.12	0
1495	CTNNA1	catenin alpha 1	131	0	0	0	0	0.116	0.093	0.12	0
171177	RHOV	ras homolog family member V	139	0	0	0.5	0	0.109	0.079	0.12	0
29984	RHOD	ras homolog family member D	144	0	0	0	0	0.114	0.088	0.12	0
5747	PTK2	protein tyrosine kinase 2	247	0	0.5	0	0	0.117	0.095	0.12	0
59284	CACNG7	calcium voltage-gated channel auxiliary subunit gamma 7	51	0	0	0	0	0.116	0.094	0.119	0
5024	P2RX3	purinergic receptor P2X 3	6	0	0	0	0	0.116	0.095	0.119	0
27092	CACNG4	calcium voltage-gated channel auxiliary subunit gamma 4	47	0	0	0	0	0.116	0.096	0.118	0
2915	GRM5	glutamate metabotropic receptor 5	185	0	0	0	0	0.105	0.075	0.118	0
4609	MYC	MYC proto-oncogene, bHLH transcription factor	147	0	0	0	0	0.111	0.086	0.118	0
983	CDK1	cyclin dependent kinase 1	534	0	0	0	0	0.119	0.103	0.118	0
9127	P2RX6	purinergic receptor P2X 6	8	0	0	0	0	0.124	0.114	0.117	0
24145	PANX1	pannexin 1	2	0	0	0	0	0.131	0.127	0.117	0
3717	JAK2	Janus kinase 2	230	0	0	0	0	0.108	0.082	0.117	0
784	CACNB3	calcium voltage-gated channel auxiliary subunit beta 3	63	0	0	0	0	0.105	0.079	0.116	0
817	CAMK2D	calcium/calmodulin dependent protein kinase II delta	79	0	0	0	0	0.105	0.08	0.116	0
58480	RHOU	ras homolog family member U	141	0	0	0	0	0.109	0.088	0.116	0
23221	RHOBTB2	Rho related BTB domain containing 2	142	0	0	0	0	0.108	0.086	0.115	0
1432	MAPK14	mitogen-activated protein kinase 14	264	0	0	0.5	0	0.114	0.098	0.115	0
9580	SOX13	SRY-box 13	7	0	0	0	0	0.122	0.114	0.115	0
11091	WDR5	WD repeat domain 5	221	0	0	0	0	0.108	0.086	0.115	0
785	CACNB4	calcium voltage-gated channel auxiliary subunit beta 4	36	0	0	0	0	0.11	0.09	0.115	0
786	CACNG1	calcium voltage-gated channel auxiliary subunit gamma 1	34	0	0	0	0	0.103	0.076	0.115	0
4893	NRAS	NRAS proto-oncogene, GTPase	343	0	0	0	0	0.114	0.099	0.115	0
2893	GRIA4	glutamate ionotropic receptor AMPA type subunit 4	47	0	0	0	0	0.107	0.086	0.114	0
7529	YWHAB	tyrosine 3-monooxygenase/tryptophan 5-monooxygenase activation protein beta	174	0	0	0	0	0.105	0.083	0.114	0
2911	GRM1	glutamate metabotropic receptor 1	201	0	0	0	0	0.111	0.094	0.114	0
22953	P2RX2	purinergic receptor P2X 2	6	0	0	0	0	0.116	0.105	0.114	0
3066	HDAC2	histone deacetylase 2	209	0	0	0	0	0.108	0.089	0.114	0
5518	PPP2R1A	protein phosphatase 2 scaffold subunit Aalpha	512	0	0	0.5	0	0.11	0.093	0.113	0
779	CACNA1S	calcium voltage-gated channel subunit alpha1 S	41	0	0	0	0	0.108	0.089	0.113	0
5929	RBBP5	RB binding protein 5, histone lysine methyltransferase complex subunit	204	0	0	0.5	0	0.104	0.082	0.113	0
10891	PPARGC1A	PPARG coactivator 1 alpha	137	0	0	0	0	0.099	0.074	0.112	0
399	RHOH	ras homolog family member H	139	0	0	0	0	0.109	0.093	0.112	0
8645	KCNK5	potassium two pore domain channel subfamily K member 5	8	0	0	0	0	0.103	0.082	0.112	0
5908	RAP1B	RAP1B, member of RAS oncogene family	206	0	0	0.5	0	0.102	0.081	0.112	0
1000	CDH2	cadherin 2	175	0	0	0	0	0.101	0.079	0.112	0
5593	PRKG2	protein kinase cGMP-dependent 2	50	0	0	0	0	0.108	0.094	0.111	0
57381	RHOJ	ras homolog family member J	140	0	0	0	0	0.109	0.095	0.111	0
9978	RBX1	ring-box 1	551	0	0	0	0	0.106	0.09	0.111	0
2897	GRIK1	glutamate ionotropic receptor kainate type subunit 1	8	0	0	0	0	0.105	0.089	0.11	0
2741	GLRA1	glycine receptor alpha 1	4	0	0	0	0	0.116	0.114	0.11	0
28988	DBNL	drebrin like	100	0	0	0	0	0.112	0.104	0.11	0
55288	RHOT1	ras homolog family member T1	152	0	0	0.5	0	0.11	0.1	0.11	0
59285	CACNG6	calcium voltage-gated channel auxiliary subunit gamma 6	33	0	0	0	0	0.103	0.087	0.109	0
2891	GRIA2	glutamate ionotropic receptor AMPA type subunit 2	52	0	0	0	0	0.099	0.078	0.109	0
2900	GRIK4	glutamate ionotropic receptor kainate type subunit 4	8	0	0	0	0	0.105	0.09	0.109	0
3630	INS	insulin	212	0	0	0	0	0.104	0.089	0.109	0
56261	GPCPD1	glycerophosphocholine phosphodiesterase 1	13	0	0	0.5	0	0.121	0.126	0.109	0
8085	KMT2D	lysine methyltransferase 2D	125	0	0	0	0	0.101	0.084	0.109	0
254013	ETFBKMT	electron transfer flavoprotein subunit beta lysine methyltransferase	1	0	0	0	0	0.112	0.108	0.108	0
3725	JUN	Jun proto-oncogene, AP-1 transcription factor subunit	280	0	0	0	0	0.109	0.102	0.108	0
818	CAMK2G	calcium/calmodulin dependent protein kinase II gamma	54	0	0	0	0	0.094	0.073	0.107	0
8290	HIST3H3	histone cluster 3 H3	218	0	0	0	0	0.098	0.082	0.107	0
6654	SOS1	SOS Ras/Rac guanine nucleotide exchange factor 1	276	0	0	0	0	0.104	0.094	0.107	0
8841	HDAC3	histone deacetylase 3	236	0	0	0	0	0.105	0.096	0.107	0
391	RHOG	ras homolog family member G	160	0	0	0	0	0.109	0.105	0.106	0
10499	NCOA2	nuclear receptor coactivator 2	144	0	0	0	0	0.101	0.089	0.106	0
1500	CTNND1	catenin delta 1	101	0	0	0	0	0.098	0.083	0.106	0
9886	RHOBTB1	Rho related BTB domain containing 1	143	0	0	0	0	0.108	0.106	0.105	0
6500	SKP1	S-phase kinase associated protein 1	449	0	0	0	0	0.104	0.097	0.105	0
7531	YWHAE	tyrosine 3-monooxygenase/tryptophan 5-monooxygenase activation protein epsilon	217	0	0	0	0	0.1	0.088	0.105	0
207	AKT1	AKT serine/threonine kinase 1	256	0	0.5	0.5	0	0.105	0.101	0.105	0
5347	PLK1	polo like kinase 1	393	0	0	0	0	0.104	0.099	0.104	0
6867	TACC1	transforming acidic coiled-coil containing protein 1	7	0	0	0.5	0	0.096	0.082	0.104	0
3306	HSPA2	heat shock protein family A (Hsp70) member 2	158	0	0	0	0	0.104	0.1	0.104	0
5516	PPP2CB	protein phosphatase 2 catalytic subunit beta	294	0	0	0	0	0.097	0.084	0.104	0
9470	EIF4E2	eukaryotic translation initiation factor 4E family member 2	31	0	0	0	0	0.101	0.093	0.104	0
5577	PRKAR2B	protein kinase cAMP-dependent type II regulatory subunit beta	204	0	0	0	0	0.092	0.074	0.104	0
8454	CUL1	cullin 1	439	0	0	0.5	0	0.095	0.082	0.103	0
1956	EGFR	epidermal growth factor receptor	283	0	0	0	0	0.105	0.103	0.103	0
84159	ARID5B	AT-rich interaction domain 5B	3	0	1	0.5	0	0.101	0.095	0.103	0
335	APOA1	apolipoprotein A1	195	0	0	0	0	0.093	0.079	0.103	0
5431	POLR2B	RNA polymerase II subunit B	466	0	0	0.5	0	0.098	0.09	0.103	0
165215	FAM171B	family with sequence similarity 171 member B	1	0	0	0	0	0.104	0.102	0.103	0
286	ANK1	ankyrin 1	111	0	0.5	0.5	0	0.092	0.077	0.102	0
5571	PRKAG1	protein kinase AMP-activated non-catalytic subunit gamma 1	80	0	0	0.5	0	0.097	0.089	0.102	0
25	ABL1	ABL proto-oncogene 1, non-receptor tyrosine kinase	130	0	0	0.5	0	0.099	0.095	0.102	0
117155	CATSPER2	cation channel sperm associated 2	30	0	0	0	0	0.093	0.081	0.102	0
5063	PAK3	p21 (RAC1) activated kinase 3	102	0	0	0	0	0.096	0.087	0.101	0
6900	CNTN2	contactin 2	7	0	0	0	0	0.104	0.105	0.101	0
2186	BPTF	bromodomain PHD finger transcription factor	73	0	0	0	0	0.092	0.08	0.101	0
2743	GLRB	glycine receptor beta	7	0	0	0	0	0.11	0.119	0.101	0
1950	EGF	epidermal growth factor	298	0	0	0	0	0.096	0.089	0.101	0
5436	POLR2G	RNA polymerase II subunit G	463	0	0	0.5	0	0.099	0.095	0.101	0
2892	GRIA3	glutamate ionotropic receptor AMPA type subunit 3	48	0	0	0	0	0.106	0.113	0.101	0
4211	MEIS1	Meis homeobox 1	69	0	0	0.5	0	0.1	0.099	0.101	0
6844	VAMP2	vesicle associated membrane protein 2	245	0	0	0.5	0	0.107	0.115	0.101	0
55584	CHRNA9	cholinergic receptor nicotinic alpha 9 subunit	12	0	0	0	0	0.096	0.09	0.1	0
9612	NCOR2	nuclear receptor corepressor 2	155	0	0.5	0.5	0	0.093	0.083	0.1	0
10497	UNC13B	unc-13 homolog B	29	0	0	0	0	0.097	0.093	0.1	0
5500	PPP1CB	protein phosphatase 1 catalytic subunit beta	119	0	0	0.5	0	0.095	0.088	0.1	0
5434	POLR2E	RNA polymerase II subunit E	519	0	0	0.5	0	0.104	0.108	0.1	0
6616	SNAP25	synaptosome associated protein 25	184	0	0	0	0	0.093	0.085	0.1	0
23309	SIN3B	SIN3 transcription regulator family member B	105	0	0	0	0	0.09	0.077	0.1	0
867	CBL	Cbl proto-oncogene	273	0	0	0.5	0	0.096	0.092	0.1	0
84859	LRCH3	leucine rich repeats and calponin homology domain containing 3	4	0	0	0	0	0.117	0.141	0.1	0
57631	LRCH2	leucine rich repeats and calponin homology domain containing 2	1	0	0	0	0	0.105	0.112	0.1	0
79820	CATSPERB	cation channel sperm associated auxiliary subunit beta	30	0	0	0	0	0.093	0.085	0.1	0
5599	MAPK8	mitogen-activated protein kinase 8	198	0	0	0.5	0	0.096	0.091	0.099	0
3688	ITGB1	integrin subunit beta 1	234	0	0	0	0	0.108	0.122	0.099	0
11168	PSIP1	PC4 and SFRS1 interacting protein 1	4	0	0	1	0	0.096	0.094	0.099	0
6507	SLC1A3	solute carrier family 1 member 3	1	0	0	0	0	0.104	0.111	0.099	0
117144	CATSPER1	cation channel sperm associated 1	30	0	0	0	0	0.093	0.087	0.099	0
347732	CATSPER3	cation channel sperm associated 3	30	0	0	0	0	0.093	0.087	0.099	0
8001	GLRA3	glycine receptor alpha 3	6	0	0	0	0	0.102	0.107	0.099	0
192669	AGO3	argonaute RISC catalytic component 3	153	0	0	0	0	0.094	0.09	0.099	0
4088	SMAD3	SMAD family member 3	177	0	0	0.5	0	0.096	0.095	0.099	0
214	ALCAM	activated leukocyte cell adhesion molecule	2	0	0	0.5	0	0.104	0.114	0.098	0
55327	LIN7C	lin-7 homolog C, crumbs cell polarity complex component	29	0	0	0.5	0	0.096	0.094	0.098	0
4209	MEF2D	myocyte enhancer factor 2D	53	0	0	0.5	0	0.094	0.09	0.098	0
93589	CACNA2D4	calcium voltage-gated channel auxiliary subunit alpha2delta 4	33	0	0	0	0	0.095	0.093	0.098	0
5501	PPP1CC	protein phosphatase 1 catalytic subunit gamma	202	0	0	0	0	0.093	0.088	0.098	0
7534	YWHAZ	tyrosine 3-monooxygenase/tryptophan 5-monooxygenase activation protein zeta	141	0	0	0	0	0.088	0.077	0.098	0
116113	FOXP4	forkhead box P4	3	0	0	0	0	0.11	0.13	0.098	0
991	CDC20	cell division cycle 20	518	0	0	0	0	0.095	0.094	0.098	0
5440	POLR2K	RNA polymerase II subunit K	506	0	0	0	0	0.103	0.114	0.097	0
9070	ASH2L	ASH2 like, histone lysine methyltransferase complex subunit	128	0	0	0	0	0.095	0.096	0.097	0
8202	NCOA3	nuclear receptor coactivator 3	186	0	0	0	0	0.097	0.099	0.097	0
2120	ETV6	ETS variant 6	2	0	0	0	0	0.103	0.114	0.097	0
5468	PPARG	peroxisome proliferator activated receptor gamma	130	0	0	0	0	0.097	0.101	0.097	0
6602	SMARCD1	SWI/SNF related, matrix associated, actin dependent regulator of chromatin, subfamily d, member 1	72	0	0.5	0	0	0.093	0.09	0.097	0
4690	NCK1	NCK adaptor protein 1	160	0	0	0	0	0.092	0.089	0.097	0
246329	STAC3	SH3 and cysteine rich domain 3	30	0	0	0	0	0.093	0.092	0.096	0
25858	CATSPERZ	catsper channel auxiliary subunit zeta	30	0	0	0	0	0.093	0.092	0.096	0
192670	AGO4	argonaute RISC component 4	149	0	0	0	0	0.094	0.095	0.096	0
781	CACNA2D1	calcium voltage-gated channel auxiliary subunit alpha2delta 1	33	0	0	0	0	0.095	0.097	0.096	0
7341	SUMO1	small ubiquitin like modifier 1	251	0	0	0.5	0	0.099	0.106	0.096	0
23114	NFASC	neurofascin	31	0	0	0	0	0.099	0.106	0.096	0
54542	RC3H2	ring finger and CCCH-type domains 2	3	0	0	0.5	0	0.093	0.092	0.096	0
2908	NR3C1	nuclear receptor subfamily 3 group C member 1	128	0	0	0.5	0	0.086	0.076	0.096	0
375790	AGRN	agrin	107	0	0.5	0	0	0.095	0.099	0.096	0
595	CCND1	cyclin D1	202	0	0.5	0	0	0.101	0.112	0.096	0
5437	POLR2H	RNA polymerase II subunit H	510	0	0	0	0	0.103	0.118	0.096	0
5441	POLR2L	RNA polymerase II subunit L	519	0	0	0.5	0	0.103	0.119	0.096	0
5469	MED1	mediator complex subunit 1	186	0	0	1	0	0.102	0.116	0.095	0
7414	VCL	vinculin	191	0	0.5	0	0	0.095	0.1	0.095	0
5925	RB1	RB transcriptional corepressor 1	159	0	0.5	0	0	0.091	0.089	0.095	0
378807	CATSPER4	cation channel sperm associated 4	30	0	0	0	0	0.093	0.095	0.095	0
5432	POLR2C	RNA polymerase II subunit C	464	0	0	0	0	0.098	0.107	0.095	0
6604	SMARCD3	SWI/SNF related, matrix associated, actin dependent regulator of chromatin, subfamily d, member 3	95	0	0	0	0	0.093	0.095	0.095	0
4646	MYO6	myosin VI	57	0	0	0	0	0.093	0.096	0.095	0
23512	SUZ12	SUZ12 polycomb repressive complex 2 subunit	141	0	0	0	0	0.088	0.084	0.095	0
1145	CHRNE	cholinergic receptor nicotinic epsilon subunit	10	0	0.5	0	0	0.094	0.099	0.095	0
1134	CHRNA1	cholinergic receptor nicotinic alpha 1 subunit	49	0	0	0	0	0.088	0.084	0.095	0
4803	NGF	nerve growth factor	125	0	0	0	0	0.089	0.086	0.095	0
2903	GRIN2A	glutamate ionotropic receptor NMDA type subunit 2A	53	0	0	0	0	0.091	0.093	0.094	0
79178	THTPA	thiamine triphosphatase	5	0	0	0	0	0.09	0.091	0.094	0
5515	PPP2CA	protein phosphatase 2 catalytic subunit alpha	426	0	0	0	0	0.099	0.113	0.094	0
9495	AKAP5	A-kinase anchoring protein 5	45	0	0	0	0	0.091	0.094	0.094	0
4205	MEF2A	myocyte enhancer factor 2A	46	0	0	1	0	0.09	0.091	0.094	0
112755	STX1B	syntaxin 1B	18	0	0	0	0	0.089	0.089	0.094	0
57828	CATSPERG	cation channel sperm associated auxiliary subunit gamma	30	0	0	0	0	0.093	0.099	0.093	0
1472	CST4	cystatin S	2	0	0	0	0	0.112	0.146	0.093	0
5435	POLR2F	RNA polymerase II subunit F	534	0	0	0	0	0.103	0.125	0.093	0
5901	RAN	RAN, member RAS oncogene family	156	0	0	0	0	0.094	0.101	0.093	0
27091	CACNG5	calcium voltage-gated channel auxiliary subunit gamma 5	33	0	0	0	0	0.094	0.102	0.093	0
10096	ACTR3	actin related protein 3	170	0	0	0.5	0	0.092	0.098	0.093	0
160	AP2A1	adaptor related protein complex 2 subunit alpha 1	230	0	0	0.5	0	0.087	0.085	0.093	0
347487	CXorf66	chromosome X open reading frame 66	1	0	0	0	0	0.089	0.09	0.093	0
3054	HCFC1	host cell factor C1	70	0	0	0.5	0	0.088	0.088	0.093	0
2905	GRIN2C	glutamate ionotropic receptor NMDA type subunit 2C	43	0	0	0	0	0.086	0.082	0.093	0
57731	SPTBN4	spectrin beta, non-erythrocytic 4	109	0	0	0	0	0.084	0.079	0.093	0
26280	IL1RAPL2	interleukin 1 receptor accessory protein like 2	3	0	0	0	0	0.085	0.082	0.093	0
472	ATM	ATM serine/threonine kinase	225	0	0.5	0.5	0	0.09	0.092	0.093	0
10618	TGOLN2	trans-golgi network protein 2	288	0	0	0	0	0.09	0.094	0.093	0
10524	KAT5	lysine acetyltransferase 5	216	0	0	0	0	0.086	0.085	0.092	0
2648	KAT2A	lysine acetyltransferase 2A	177	0	0.5	0	0	0.085	0.083	0.092	0
6327	SCN2B	sodium voltage-gated channel beta subunit 2	29	0	0	0	0	0.085	0.083	0.092	0
6710	SPTB	spectrin beta, erythrocytic	109	0	0.5	0	0	0.084	0.081	0.092	0
891	CCNB1	cyclin B1	346	0	0	0	0	0.093	0.104	0.092	0
4081	MAB21L1	mab-21 like 1	7	0	0	0	0	0.089	0.094	0.092	0
5439	POLR2J	RNA polymerase II subunit J	449	0	0	0	0	0.094	0.107	0.092	0
27327	TNRC6A	trinucleotide repeat containing adaptor 6A	125	0	0	0	0	0.094	0.107	0.092	0
1141	CHRNB2	cholinergic receptor nicotinic beta 2 subunit	15	0	0	0	0	0.095	0.11	0.092	0
257044	CATSPERE	catsper channel auxiliary subunit epsilon	30	0	0	0	0	0.093	0.104	0.091	0
6923	ELOB	elongin B	427	0	0	0.5	0	0.085	0.083	0.091	0
4868	NPHS1	NPHS1 adhesion molecule, nephrin	31	0	0	0	0	0.094	0.106	0.091	0
5087	PBX1	PBX homeobox 1	89	0	0.5	0	0	0.084	0.083	0.091	0
6464	SHC1	SHC adaptor protein 1	211	0	0	0	0	0.092	0.103	0.091	0
10097	ACTR2	actin related protein 2	252	0	0	1	0	0.089	0.095	0.091	0
4034	LRCH4	leucine rich repeats and calponin homology domain containing 4	2	0	0	0	0	0.103	0.131	0.091	0
1781	DYNC1I2	dynein cytoplasmic 1 intermediate chain 2	337	0	0	0	0	0.091	0.099	0.091	0
782	CACNB1	calcium voltage-gated channel auxiliary subunit beta 1	21	0	0	0	0	0.086	0.089	0.091	0
6794	STK11	serine/threonine kinase 11	34	0	0	0	0	0.088	0.094	0.091	0
1639	DCTN1	dynactin subunit 1	173	0	0	0.5	0	0.091	0.1	0.091	0
3674	ITGA2B	integrin subunit alpha 2b	143	0	0	0	0	0.086	0.088	0.091	0
57690	TNRC6C	trinucleotide repeat containing adaptor 6C	125	0	0	0	0	0.09	0.098	0.09	0
6605	SMARCE1	SWI/SNF related, matrix associated, actin dependent regulator of chromatin, subfamily e, member 1	73	0	0	0	0	0.092	0.104	0.09	0
320	APBA1	amyloid beta precursor protein binding family A member 1	27	0	0	0	0	0.085	0.086	0.09	0
8976	WASL	WASP like actin nucleation promoting factor	174	0	0	0	0	0.083	0.082	0.09	0
23143	LRCH1	leucine rich repeats and calponin homology domain containing 1	2	0	0	0	0	0.103	0.134	0.09	0
2906	GRIN2D	glutamate ionotropic receptor NMDA type subunit 2D	44	0	0	0	0	0.085	0.087	0.09	0
5048	PAFAH1B1	platelet activating factor acetylhydrolase 1b regulatory subunit 1	251	0	0	0	0	0.087	0.093	0.09	0
7532	YWHAG	tyrosine 3-monooxygenase/tryptophan 5-monooxygenase activation protein gamma	191	0	0	1	0	0.095	0.112	0.09	0
257062	CATSPERD	cation channel sperm associated auxiliary subunit delta	30	0	0	0	0	0.093	0.108	0.09	0
2146	EZH2	enhancer of zeste 2 polycomb repressive complex 2 subunit	144	0	0	0	0	0.089	0.099	0.09	0
5336	PLCG2	phospholipase C gamma 2	124	0	0	0	0	0.083	0.082	0.09	0
4149	MAX	MYC associated factor X	93	0	0.5	0	0	0.085	0.088	0.09	0
6711	SPTBN1	spectrin beta, non-erythrocytic 1	122	0	0	0	0	0.086	0.092	0.089	0
8726	EED	embryonic ectoderm development	163	0	0	0	0	0.094	0.112	0.089	0
1135	CHRNA2	cholinergic receptor nicotinic alpha 2 subunit	12	0	0	0	0	0.096	0.118	0.089	0
2810	SFN	stratifin	96	0	0	0	0	0.088	0.096	0.089	0
890	CCNA2	cyclin A2	313	0	0	0	0	0.089	0.099	0.089	0
51332	SPTBN5	spectrin beta, non-erythrocytic 5	109	0	0	0	0	0.084	0.088	0.089	0
6603	SMARCD2	SWI/SNF related, matrix associated, actin dependent regulator of chromatin, subfamily d, member 2	44	0	0	0	0	0.089	0.1	0.089	0
10284	SAP18	Sin3A associated protein 18	113	0	0	0	0	0.083	0.085	0.089	0
1398	CRK	CRK proto-oncogene, adaptor protein	140	0	0	0.5	0	0.083	0.085	0.089	0
6045	RNF2	ring finger protein 2	165	0	0	0	0	0.086	0.094	0.088	0
11116	FGFR1OP	FGFR1 oncogene partner	145	0	0	0	0	0.086	0.093	0.088	0
5906	RAP1A	RAP1A, member of RAS oncogene family	241	0	0	0	0	0.093	0.114	0.088	0
2280	FKBP1A	FKBP prolyl isomerase 1A	88	0	0	0.5	0	0.086	0.096	0.088	0
1002	CDH4	cadherin 4	34	0	0	0	0	0.081	0.084	0.087	0
4218	RAB8A	RAB8A, member RAS oncogene family	208	0	0	0	0	0.09	0.106	0.087	0
22919	MAPRE1	microtubule associated protein RP/EB family member 1	222	0	0	0	0	0.082	0.086	0.087	0
4221	MEN1	menin 1	165	0	0	0	0	0.086	0.097	0.087	0
5563	PRKAA2	protein kinase AMP-activated catalytic subunit alpha 2	68	0	0	0	0	0.083	0.09	0.087	0
5562	PRKAA1	protein kinase AMP-activated catalytic subunit alpha 1	67	0	0	0	0	0.083	0.088	0.087	0
4067	LYN	LYN proto-oncogene, Src family tyrosine kinase	191	0	1	0	0	0.085	0.094	0.087	0
54820	NDE1	nudE neurodevelopment protein 1	209	0	0	0.5	0	0.082	0.086	0.087	0
336	APOA2	apolipoprotein A2	181	0	0	0	0	0.085	0.095	0.087	0
5582	PRKCG	protein kinase C gamma	98	0	0	0.5	0	0.088	0.102	0.087	0
408	ARRB1	arrestin beta 1	269	0	0	0.5	0	0.088	0.102	0.087	0
6598	SMARCB1	SWI/SNF related, matrix associated, actin dependent regulator of chromatin, subfamily b, member 1	65	0	0	0.5	0	0.086	0.097	0.087	0
7336	UBE2V2	ubiquitin conjugating enzyme E2 V2	356	0	0	0	0	0.079	0.079	0.087	0
4343	MOV10	Mov10 RISC complex RNA helicase	128	0	0	0	0	0.09	0.109	0.087	0
6330	SCN4B	sodium voltage-gated channel beta subunit 4	29	0	0	0	0	0.085	0.096	0.087	0
351	APP	amyloid beta precursor protein	583	0	0.5	0	0	0.102	0.143	0.087	0
9274	BCL7C	BAF chromatin remodeling complex subunit BCL7C	23	0	0	0	0	0.082	0.089	0.086	0
5433	POLR2D	RNA polymerase II subunit D	461	0	0	0	0	0.095	0.123	0.086	0
5894	RAF1	Raf-1 proto-oncogene, serine/threonine kinase	164	0	0	0	0	0.081	0.086	0.086	0
2564	GABRE	gamma-aminobutyric acid type A receptor epsilon subunit	7	0	0	0	0	0.087	0.101	0.086	0
55800	SCN3B	sodium voltage-gated channel beta subunit 3	29	0	0.5	0	0	0.085	0.097	0.086	0
6324	SCN1B	sodium voltage-gated channel beta subunit 1	29	0	0	0	0	0.085	0.097	0.086	0
10093	ARPC4	actin related protein 2/3 complex subunit 4	160	0	0	0	0	0.082	0.089	0.086	0
56987	BBX	BBX high mobility group box domain containing	2	0	0	1	0	0.112	0.17	0.086	0
409	ARRB2	arrestin beta 2	251	0	0	0.5	0	0.088	0.106	0.086	0
7525	YES1	YES proto-oncogene 1, Src family tyrosine kinase	154	0	0	1	0	0.086	0.1	0.086	0
55034	MOCOS	molybdenum cofactor sulfurase	1	0	0	0	0	0.086	0.102	0.086	0
51701	NLK	nemo like kinase	31	0	0	0.5	0	0.079	0.082	0.086	0
11065	UBE2C	ubiquitin conjugating enzyme E2 C	440	0	0	0	0	0.085	0.098	0.086	0
482	ATP1B2	ATPase Na+/K+ transporting subunit beta 2	27	0	0	0	0	0.093	0.119	0.086	0
9686	VGLL4	vestigial like family member 4	4	0	1	0	0	0.086	0.101	0.086	0
6708	SPTA1	spectrin alpha, erythrocytic 1	110	0	0	0	0	0.084	0.097	0.085	0
10014	HDAC5	histone deacetylase 5	108	0	0	0	0	0.079	0.084	0.085	0
51422	PRKAG2	protein kinase AMP-activated non-catalytic subunit gamma 2	66	0	0.5	0	0	0.081	0.089	0.085	0
8087	FXR1	FMR1 autosomal homolog 1	64	0	0	0.5	0	0.083	0.093	0.085	0
51176	LEF1	lymphoid enhancer binding factor 1	75	0	0	0.5	0	0.082	0.091	0.085	0
2932	GSK3B	glycogen synthase kinase 3 beta	205	0	0	0	0	0.086	0.102	0.085	0
917	CD3G	CD3g molecule	227	0	0	0.5	0	0.088	0.108	0.085	0
5335	PLCG1	phospholipase C gamma 1	265	0	0	1	0	0.095	0.129	0.085	0
79796	ALG9	ALG9 alpha-1,2-mannosyltransferase	3	0	0.5	0	0	0.103	0.15	0.085	0
23373	CRTC1	CREB regulated transcription coactivator 1	8	0	0	0	0	0.083	0.095	0.085	0
3915	LAMC1	laminin subunit gamma 1	159	0	0.5	0	0	0.083	0.095	0.085	0
6237	RRAS	RAS related	74	0	0	0	0	0.079	0.085	0.085	0
79053	ALG8	ALG8 alpha-1,3-glucosyltransferase	3	0	0.5	0	0	0.112	0.175	0.084	0
1211	CLTA	clathrin light chain A	205	0	0	0	0	0.081	0.092	0.084	0
6760	SS18	SS18 subunit of BAF chromatin remodeling complex	23	0	0	0.5	0	0.082	0.093	0.084	0
5527	PPP2R5C	protein phosphatase 2 regulatory subunit B'gamma	237	0	0	1	0	0.082	0.094	0.084	0
10533	ATG7	autophagy related 7	326	0	0	0.5	0	0.08	0.088	0.084	0
7319	UBE2A	ubiquitin conjugating enzyme E2 A	296	0	0	0	0	0.072	0.067	0.084	0
51412	ACTL6B	actin like 6B	38	0	0	0	0	0.078	0.083	0.084	0
11059	WWP1	WW domain containing E3 ubiquitin protein ligase 1	330	0	0.5	0.5	0	0.078	0.083	0.084	0
1738	DLD	dihydrolipoamide dehydrogenase	61	0	0	0	0	0.085	0.103	0.084	0
672	BRCA1	BRCA1 DNA repair associated	273	0	0	0	0	0.085	0.102	0.084	0
6667	SP1	Sp1 transcription factor	173	0	0	0.5	0	0.081	0.092	0.084	0
57216	VANGL2	VANGL planar cell polarity protein 2	13	0	0	0	0	0.087	0.11	0.084	0
483	ATP1B3	ATPase Na+/K+ transporting subunit beta 3	26	0	0	0	0	0.092	0.123	0.084	0
54454	ATAD2B	ATPase family AAA domain containing 2B	13	0	0	0.5	0	0.074	0.075	0.083	0
9546	APBA3	amyloid beta precursor protein binding family A member 3	8	0	0.5	0	0	0.08	0.09	0.083	0
7409	VAV1	vav guanine nucleotide exchange factor 1	145	0	0	0	0	0.084	0.102	0.083	0
2017	CTTN	cortactin	161	0	0	0.5	0	0.078	0.086	0.083	0
1142	CHRNB3	cholinergic receptor nicotinic beta 3 subunit	10	0	0	0	0	0.086	0.108	0.083	0
86	ACTL6A	actin like 6A	115	0	0.5	0	0	0.089	0.117	0.083	0
58	ACTA1	actin alpha 1, skeletal muscle	105	0	0	0	0	0.08	0.093	0.083	0
480	ATP1A4	ATPase Na+/K+ transporting subunit alpha 4	24	0	1	0	0	0.089	0.118	0.083	0
6790	AURKA	aurora kinase A	279	0	0	0	0	0.085	0.106	0.083	0
10109	ARPC2	actin related protein 2/3 complex subunit 2	163	0	0	0	0	0.082	0.098	0.083	0
55644	OSGEP	O-sialoglycoprotein endopeptidase	10	0	0	0	0	0.091	0.122	0.083	0
23439	ATP1B4	ATPase Na+/K+ transporting family member beta 4	18	0	0	0	0	0.081	0.095	0.083	0
221613	HIST1H2AA	histone cluster 1 H2A family member a	153	0	0	0	0	0.078	0.087	0.083	0
10552	ARPC1A	actin related protein 2/3 complex subunit 1A	155	0	0	0	0	0.081	0.095	0.083	0
64130	LIN7B	lin-7 homolog B, crumbs cell polarity complex component	30	0	0	0	0	0.08	0.092	0.083	0
9736	USP34	ubiquitin specific peptidase 34	45	0	0	0	0	0.077	0.086	0.083	0
9254	CACNA2D2	calcium voltage-gated channel auxiliary subunit alpha2delta 2	44	0	0	0	0	0.08	0.093	0.083	0
5089	PBX2	PBX homeobox 2	7	0	0	0	0	0.083	0.102	0.082	0
441509	GLRA4	glycine receptor alpha 4	4	0	0	0	0	0.093	0.129	0.082	0
477	ATP1A2	ATPase Na+/K+ transporting subunit alpha 2	28	0	0.5	0	0	0.088	0.117	0.082	0
5789	PTPRD	protein tyrosine phosphatase receptor type D	16	0	0	0	0	0.103	0.159	0.082	0
10092	ARPC5	actin related protein 2/3 complex subunit 5	159	0	0	0	0	0.082	0.1	0.082	0
121643	FOXN4	forkhead box N4	1	0	0	0	0	0.081	0.096	0.082	0
10094	ARPC3	actin related protein 2/3 complex subunit 3	166	0	0	0	0	0.082	0.1	0.082	0
1138	CHRNA5	cholinergic receptor nicotinic alpha 5 subunit	10	0	0	0	0	0.086	0.112	0.082	0
10735	STAG2	stromal antigen 2	172	0	0	0.5	0	0.078	0.09	0.082	0
83737	ITCH	itchy E3 ubiquitin protein ligase	338	0	0	0.5	0	0.076	0.085	0.082	0
5090	PBX3	PBX homeobox 3	9	0	0	0	0	0.085	0.111	0.081	0
85235	HIST1H2AH	histone cluster 1 H2A family member h	132	0	0	0	0	0.078	0.09	0.081	0
54815	GATAD2A	GATA zinc finger domain containing 2A	127	0	0.5	0.5	0	0.074	0.08	0.081	0
9564	BCAR1	BCAR1 scaffold protein, Cas family member	121	0	0	0	0	0.08	0.096	0.081	0
27161	AGO2	argonaute RISC catalytic component 2	154	0	0.5	0.5	0	0.077	0.088	0.081	0
1457	CSNK2A1	casein kinase 2 alpha 1	89	0	0	0	0	0.076	0.085	0.081	0
5603	MAPK13	mitogen-activated protein kinase 13	73	0	0	0.5	0	0.076	0.087	0.081	0
64750	SMURF2	SMAD specific E3 ubiquitin protein ligase 2	351	0	0	0	0	0.078	0.093	0.081	0
375	ARF1	ADP ribosylation factor 1	218	0	1	0.5	0	0.087	0.118	0.081	0
6613	SUMO2	small ubiquitin like modifier 2	160	0	0	0	0	0.078	0.091	0.081	0
2266	FGG	fibrinogen gamma chain	252	0	1	0	0	0.087	0.118	0.081	0
9066	SYT7	synaptotagmin 7	3	0	0	0	0	0.075	0.085	0.081	0
4656	MYOG	myogenin	15	0	0	0	0	0.08	0.098	0.081	0
64241	ABCG8	ATP binding cassette subfamily G member 8	19	0	0	0	0	0.083	0.106	0.081	0
5977	DPF2	double PHD fingers 2	24	0	0	0	0	0.074	0.081	0.08	0
868	CBLB	Cbl proto-oncogene B	310	0	0	0	0	0.075	0.084	0.08	0
55294	FBXW7	F-box and WD repeat domain containing 7	313	0	0	0	0	0.079	0.097	0.08	0
9793	CKAP5	cytoskeleton associated protein 5	225	0	0	0.5	0	0.08	0.1	0.08	0
4617	MYF5	myogenic factor 5	14	0	0	0	0	0.077	0.091	0.08	0
1013	CDH15	cadherin 15	34	0	0	0	0	0.081	0.103	0.08	0
2957	GTF2A1	general transcription factor IIA subunit 1	146	0	0	0	0	0.076	0.088	0.08	0
4087	SMAD2	SMAD family member 2	135	0	0	0	0	0.085	0.113	0.08	0
54778	RNF111	ring finger protein 111	292	0	0	0.5	0	0.07	0.073	0.08	0
64121	RRAGC	Ras related GTP binding C	44	0	0	0.5	0	0.079	0.096	0.08	0
6015	RING1	ring finger protein 1	140	0	0	0	0	0.074	0.082	0.08	0
347731	LRRTM3	leucine rich repeat transmembrane neuronal 3	3	0	0	0	0	0.075	0.087	0.08	0
6712	SPTBN2	spectrin beta, non-erythrocytic 2	151	0	0	0	0	0.082	0.105	0.08	0
5564	PRKAB1	protein kinase AMP-activated non-catalytic subunit beta 1	65	0	0	0	0	0.08	0.1	0.08	0
6016	RIT1	Ras like without CAAX 1	10	0	0	0.5	0	0.074	0.085	0.08	0
3667	IRS1	insulin receptor substrate 1	94	0	0	0	0	0.075	0.087	0.08	0
53632	PRKAG3	protein kinase AMP-activated non-catalytic subunit gamma 3	55	0	0	0	0	0.076	0.091	0.08	0
2719	GPC3	glypican 3	168	0	0	0	0	0.085	0.115	0.079	0
9322	TRIP10	thyroid hormone receptor interactor 10	153	0	0	0	0	0.074	0.085	0.079	0
1212	CLTB	clathrin light chain B	177	0	0	0	0	0.077	0.092	0.079	0
84881	RPUSD4	RNA pseudouridine synthase D4	2	0	0	0	0	0.1	0.162	0.079	0
4331	MNAT1	MNAT1 component of CDK activating kinase	205	0	0	0	0	0.076	0.089	0.079	0
317772	HIST2H2AB	histone cluster 2 H2A family member b	122	0	0	0.5	0	0.075	0.088	0.079	0
3910	LAMA4	laminin subunit alpha 4	50	0	0	0	0	0.078	0.097	0.079	0
8819	SAP30	Sin3A associated protein 30	91	0	0	0	0	0.076	0.092	0.079	0
10325	RRAGB	Ras related GTP binding B	42	0	0	0	0	0.078	0.096	0.079	0
1022	CDK7	cyclin dependent kinase 7	245	0	0	0	0	0.079	0.1	0.079	0
593	BCKDHA	branched chain keto acid dehydrogenase E1, alpha polypeptide	28	0	0	0.5	0	0.077	0.094	0.079	0
7088	TLE1	TLE family member 1, transcriptional corepressor	58	0	0	0	0	0.076	0.091	0.079	0
81839	VANGL1	VANGL planar cell polarity protein 1	8	0	0	0	0	0.088	0.127	0.078	0
7873	MANF	mesencephalic astrocyte derived neurotrophic factor	18	0	0	0	0	0.081	0.106	0.078	0
84962	AJUBA	ajuba LIM protein	196	0	0	0	0	0.076	0.094	0.078	0
699	BUB1	BUB1 mitotic checkpoint serine/threonine kinase	229	0	0	0	0	0.08	0.106	0.078	0
6329	SCN4A	sodium voltage-gated channel alpha subunit 4	21	0	0	0	0	0.076	0.092	0.078	0
1069	CETN2	centrin 2	210	0	0	0	0	0.076	0.094	0.078	0
8503	PIK3R3	phosphoinositide-3-kinase regulatory subunit 3	277	0	0	0	0	0.081	0.109	0.078	0
80776	B9D2	B9 domain containing 2	191	0	0	0	0	0.074	0.088	0.078	0
154743	BMT2	base methyltransferase of 25S rRNA 2 homolog	3	0	0	0	0	0.077	0.097	0.078	0
5826	ABCD4	ATP binding cassette subfamily D member 4	18	0	0	0.5	0	0.081	0.108	0.078	0
4654	MYOD1	myogenic differentiation 1	25	0	0	0	0	0.076	0.095	0.078	0
3672	ITGA1	integrin subunit alpha 1	148	0	0	0	0	0.08	0.107	0.078	0
6502	SKP2	S-phase kinase associated protein 2	382	0	0	0.5	0	0.077	0.098	0.078	0
8973	CHRNA6	cholinergic receptor nicotinic alpha 6 subunit	13	0	0	0	0	0.08	0.107	0.078	0
814	CAMK4	calcium/calmodulin dependent protein kinase IV	27	0	0	0	0	0.076	0.094	0.078	0
261734	NPHP4	nephrocystin 4	99	0	1	0	0	0.069	0.074	0.078	0
6907	TBL1X	transducin beta like 1 X-linked	110	0	0	0.5	0	0.078	0.102	0.078	0
26045	LRRTM2	leucine rich repeat transmembrane neuronal 2	3	0	0	0	0	0.075	0.093	0.078	0
5361	PLXNA1	plexin A1	33	0	0	0.5	0	0.076	0.094	0.078	0
5576	PRKAR2A	protein kinase cAMP-dependent type II regulatory subunit alpha	100	0	0	0	0	0.077	0.098	0.077	0
6908	TBP	TATA-box binding protein	206	0	0	0	0	0.079	0.104	0.077	0
9040	UBE2M	ubiquitin conjugating enzyme E2 M	334	0	0.5	0	0	0.075	0.092	0.077	0
3918	LAMC2	laminin subunit gamma 2	78	0	0	0	0	0.074	0.091	0.077	0
7533	YWHAH	tyrosine 3-monooxygenase/tryptophan 5-monooxygenase activation protein eta	89	0	0	0	0	0.074	0.09	0.077	0
5914	RARA	retinoic acid receptor alpha	106	0	1	0	0	0.073	0.088	0.077	0
11258	DCTN3	dynactin subunit 3	254	0	0	0	0	0.082	0.115	0.077	0
114791	TUBGCP5	tubulin gamma complex associated protein 5	89	0	0	0	0	0.075	0.094	0.077	0
488	ATP2A2	ATPase sarcoplasmic/endoplasmic reticulum Ca2+ transporting 2	25	0	0	0	0	0.081	0.113	0.077	0
1050	CEBPA	CCAAT enhancer binding protein alpha	82	0	0	0	0	0.072	0.084	0.077	0
55274	PHF10	PHD finger protein 10	20	0	0	0	0	0.072	0.084	0.077	0
6328	SCN3A	sodium voltage-gated channel alpha subunit 3	23	0	0	0.5	0	0.073	0.088	0.077	0
26224	FBXL3	F-box and leucine rich repeat protein 3	318	0	0	0.5	0	0.073	0.089	0.077	0
2353	FOS	Fos proto-oncogene, AP-1 transcription factor subunit	141	0	0	0	0	0.077	0.102	0.077	0
9219	MTA2	metastasis associated 1 family member 2	125	0	0	0	0	0.074	0.091	0.077	0
3276	PRMT1	protein arginine methyltransferase 1	95	0	0	0	0	0.068	0.074	0.077	0
2064	ERBB2	erb-b2 receptor tyrosine kinase 2	91	0	0.5	0	0	0.073	0.088	0.077	0
64682	ANAPC1	anaphase promoting complex subunit 1	353	0	0.5	0	0	0.074	0.091	0.077	0
8766	RAB11A	RAB11A, member RAS oncogene family	196	0	0	0	0	0.084	0.121	0.077	0
26999	CYFIP2	cytoplasmic FMR1 interacting protein 2	61	0	0	0.5	0	0.073	0.09	0.076	0
7073	TIAL1	TIA1 cytotoxic granule associated RNA binding protein like 1	37	0	0	1	0	0.077	0.102	0.076	0
6612	SUMO3	small ubiquitin like modifier 3	109	0	0	0	0	0.076	0.098	0.076	0
6938	TCF12	transcription factor 12	36	0	0	0	0	0.076	0.099	0.076	0
10670	RRAGA	Ras related GTP binding A	45	0	0	0	0	0.073	0.092	0.076	0
8697	CDC23	cell division cycle 23	354	0	0	0	0	0.074	0.093	0.076	0
284217	LAMA1	laminin subunit alpha 1	73	0	0	0	0	0.071	0.086	0.076	0
10393	ANAPC10	anaphase promoting complex subunit 10	354	0	0	0	0	0.073	0.091	0.076	0
348	APOE	apolipoprotein E	152	0	0	0	0	0.077	0.103	0.076	0
1051	CEBPB	CCAAT enhancer binding protein beta	113	0	0	0	0	0.073	0.091	0.076	0
83988	NCALD	neurocalcin delta	53	0	0	1	0	0.073	0.091	0.076	0
4641	MYO1C	myosin IC	64	0	0.5	0.5	0	0.071	0.087	0.076	0
7514	XPO1	exportin 1	163	0	0	0	0	0.074	0.095	0.076	0
8651	SOCS1	suppressor of cytokine signaling 1	306	0	0	0	0	0.072	0.088	0.076	0
7094	TLN1	talin 1	142	0	0	0.5	0	0.081	0.116	0.076	0
10347	ABCA7	ATP binding cassette subfamily A member 7	19	0	0	0	0	0.08	0.113	0.076	0
26130	GAPVD1	GTPase activating protein and VPS9 domains 1	125	0	0	0	0	0.07	0.083	0.076	0
7018	TF	transferrin	254	0	0	0	0	0.081	0.118	0.075	0
100533181	FXYD6-FXYD2	FXYD6-FXYD2 readthrough	7	0	0	0	0	0.068	0.079	0.075	0
4036	LRP2	LDL receptor related protein 2	147	0	0	0	0	0.074	0.095	0.075	0
8881	CDC16	cell division cycle 16	355	0	0	0	0	0.072	0.091	0.075	0
53615	MBD3	methyl-CpG binding domain protein 3	123	0	0	0.5	0	0.073	0.093	0.075	0
347730	LRRTM1	leucine rich repeat transmembrane neuronal 1	3	0	0	0	0	0.075	0.1	0.075	0
10058	ABCB6	ATP binding cassette subfamily B member 6 (Langereis blood group)	18	0	0	0	0	0.081	0.117	0.075	0
10856	RUVBL2	RuvB like AAA ATPase 2	127	0	0	0	0	0.076	0.104	0.075	0
4751	NEK2	NIMA related kinase 2	201	0	0	0	0	0.072	0.09	0.075	0
5970	RELA	RELA proto-oncogene, NF-kB subunit	276	0	0	0	0	0.089	0.145	0.075	0
143425	SYT9	synaptotagmin 9	121	0	0	0	0	0.068	0.08	0.075	0
57521	RPTOR	regulatory associated protein of MTOR complex 1	64	0	1	0	0	0.068	0.08	0.075	0
902	CCNH	cyclin H	214	0	0	0	0	0.079	0.112	0.075	0
5499	PPP1CA	protein phosphatase 1 catalytic subunit alpha	128	0	0.5	0	0	0.084	0.13	0.075	0
4241	MELTF	melanotransferrin	173	0	0	0	0	0.079	0.112	0.075	0
25839	COG4	component of oligomeric golgi complex 4	114	0	0	0.5	0	0.077	0.107	0.075	0
5348	FXYD1	FXYD domain containing ion transport regulator 1	23	0	0	0.5	0	0.081	0.121	0.075	0
3909	LAMA3	laminin subunit alpha 3	67	0	0	0	0	0.076	0.104	0.075	0
4853	NOTCH2	notch receptor 2	71	0	0	0	0	0.077	0.108	0.074	0
161882	ZFPM1	zinc finger protein, FOG family member 1	70	0	0.5	0.5	0	0.07	0.086	0.074	0
6017	RLBP1	retinaldehyde binding protein 1	9	0	0	0	0	0.08	0.119	0.074	0
6014	RIT2	Ras like without CAAX 2	10	0	0	0	0	0.074	0.101	0.074	0
2243	FGA	fibrinogen alpha chain	256	0	0	0	0	0.085	0.136	0.074	0
3911	LAMA5	laminin subunit alpha 5	55	0	0	0	0	0.066	0.075	0.074	0
9023	CH25H	cholesterol 25-hydroxylase	10	0	0	0	0	0.077	0.108	0.074	0
10540	DCTN2	dynactin subunit 2	271	0	0	0	0	0.084	0.132	0.074	0
605	BCL7A	BAF chromatin remodeling complex subunit BCL7A	19	0	0.5	0	0	0.07	0.089	0.074	0
11337	GABARAP	GABA type A receptor-associated protein	55	0	0	0	0	0.083	0.129	0.074	0
10298	PAK4	p21 (RAC1) activated kinase 4	67	0	0	0	0	0.07	0.089	0.074	0
55170	PRMT6	protein arginine methyltransferase 6	60	0	0	0	0	0.066	0.077	0.074	0
8674	VAMP4	vesicle associated membrane protein 4	168	0	0	0	0	0.071	0.092	0.074	0
246184	CDC26	cell division cycle 26	346	0	0	0	0	0.071	0.093	0.073	0
55352	COPRS	coordinator of PRMT5 and differentiation stimulator	31	0	0	0	0	0.067	0.08	0.073	0
1462	VCAN	versican	154	0	0.5	0	0	0.082	0.126	0.073	0
127833	SYT2	synaptotagmin 2	128	0	0	0	0	0.072	0.097	0.073	0
3914	LAMB3	laminin subunit beta 3	58	0	0	0	0	0.07	0.09	0.073	0
5525	PPP2R5A	protein phosphatase 2 regulatory subunit B'alpha	240	0	0	0	0	0.077	0.111	0.073	0
151647	TAFA4	TAFA chemokine like family member 4	1	0	0	0	0	0.083	0.132	0.073	0
10413	YAP1	Yes associated protein 1	72	0	0	0	0	0.074	0.101	0.073	0
7334	UBE2N	ubiquitin conjugating enzyme E2 N	397	0	0	0	0	0.083	0.13	0.073	0
10111	RAD50	RAD50 double strand break repair protein	153	0	0	0.5	0	0.068	0.085	0.073	0
10971	YWHAQ	tyrosine 3-monooxygenase/tryptophan 5-monooxygenase activation protein theta	82	0	0	0.5	0	0.074	0.103	0.073	0
91683	SYT12	synaptotagmin 12	3	0	0.5	0	0	0.075	0.107	0.073	0
23421	ITGB3BP	integrin subunit beta 3 binding protein	154	0	0	0	0	0.067	0.081	0.073	0
2962	GTF2F1	general transcription factor IIF subunit 1	354	0	0	0	0	0.082	0.13	0.073	0
7027	TFDP1	transcription factor Dp-1	126	0	0	0	0	0.071	0.095	0.073	0
5529	PPP2R5E	protein phosphatase 2 regulatory subunit B'epsilon	206	0	0	1	0	0.069	0.089	0.073	0
7764	ZNF217	zinc finger protein 217	76	0	0	0.5	0	0.068	0.086	0.073	0
4001	LMNB1	lamin B1	92	0	0	0.5	0	0.073	0.101	0.073	0
27338	UBE2S	ubiquitin conjugating enzyme E2 S	281	0	0	0	0	0.067	0.082	0.073	0
2899	GRIK3	glutamate ionotropic receptor kainate type subunit 3	28	0	0	0	0	0.072	0.096	0.073	0
1108	CHD4	chromodomain helicase DNA binding protein 4	125	0	0	0	0	0.074	0.103	0.073	0
5438	POLR2I	RNA polymerase II subunit I	460	0	0.5	0	0	0.094	0.169	0.073	0
5526	PPP2R5B	protein phosphatase 2 regulatory subunit B'beta	207	0	0	0	0	0.069	0.087	0.073	0
51529	ANAPC11	anaphase promoting complex subunit 11	351	0	0	0	0	0.071	0.096	0.073	0
255022	CALHM1	calcium homeostasis modulator 1	3	0	0	0	0	0.067	0.083	0.073	0
185	AGTR1	angiotensin II receptor type 1	319	0	0	0	0	0.072	0.099	0.073	0
10121	ACTR1A	actin related protein 1A	257	0	0	0	0	0.08	0.124	0.073	0
22974	TPX2	TPX2 microtubule nucleation factor	175	0	0	0	0	0.07	0.092	0.073	0
11194	ABCB8	ATP binding cassette subfamily B member 8	18	0	0	0	0	0.081	0.126	0.073	0
29882	ANAPC2	anaphase promoting complex subunit 2	349	0	0	0	0	0.073	0.101	0.073	0
51433	ANAPC5	anaphase promoting complex subunit 5	348	0	0	0	0	0.071	0.096	0.073	0
1027	CDKN1B	cyclin dependent kinase inhibitor 1B	185	0	0	0	0	0.071	0.095	0.073	0
23291	FBXW11	F-box and WD repeat domain containing 11	336	0	0	0	0	0.075	0.108	0.073	0
57787	MARK4	microtubule affinity regulating kinase 4	108	0	0	0	0	0.065	0.077	0.072	0
440093	H3F3C	H3 histone family member 3C	64	0	0	0	0	0.07	0.091	0.072	0
8825	LIN7A	lin-7 homolog A, crumbs cell polarity complex component	28	0	0	0	0	0.079	0.12	0.072	0
1785	DNM2	dynamin 2	177	0	0	0	0	0.073	0.102	0.072	0
23327	NEDD4L	neural precursor cell expressed, developmentally down-regulated 4-like, E3 ubiquitin protein ligase	302	0	0.5	0	0	0.072	0.1	0.072	0
3993	LLGL2	LLGL scribble cell polarity complex component 2	13	0	0	0	0	0.068	0.087	0.072	0
6091	ROBO1	roundabout guidance receptor 1	57	0	0	0	0	0.075	0.109	0.072	0
996	CDC27	cell division cycle 27	356	0	0	0	0	0.074	0.106	0.072	0
2309	FOXO3	forkhead box O3	63	0	0.5	0	0	0.069	0.092	0.072	0
8539	API5	apoptosis inhibitor 5	6	0	0	0.5	0	0.074	0.107	0.072	0
6249	CLIP1	CAP-Gly domain containing linker protein 1	122	0	0	1	0	0.069	0.091	0.072	0
51434	ANAPC7	anaphase promoting complex subunit 7	356	0	0	0	0	0.074	0.107	0.072	0
5365	PLXNB3	plexin B3	10	0	0	0	0	0.066	0.083	0.072	0
4747	NEFL	neurofilament light	28	0	0	0	0	0.07	0.094	0.072	0
9112	MTA1	metastasis associated 1	122	0	0.5	0	0	0.074	0.109	0.072	0
9757	KMT2B	lysine methyltransferase 2B	61	0	0	0	0	0.069	0.09	0.072	0
5362	PLXNA2	plexin A2	31	0	0	0	0	0.068	0.089	0.072	0
594	BCKDHB	branched chain keto acid dehydrogenase E1 subunit beta	29	0	0	0	0	0.078	0.12	0.072	0
10095	ARPC1B	actin related protein 2/3 complex subunit 1B	52	0	0	0	0	0.068	0.089	0.072	0
6517	SLC2A4	solute carrier family 2 member 4	91	0	0	0	0	0.073	0.103	0.072	0
64240	ABCG5	ATP binding cassette subfamily G member 5	18	0	0	0	0	0.081	0.13	0.072	0
2110	ETFDH	electron transfer flavoprotein dehydrogenase	3	0	0	0	0	0.075	0.11	0.071	0
9353	SLIT2	slit guidance ligand 2	43	0	0	0	0	0.07	0.096	0.071	0
613	BCR	BCR activator of RhoGEF and GTPase	83	0	0	0.5	0	0.065	0.079	0.071	0
23396	PIP5K1C	phosphatidylinositol-4-phosphate 5-kinase type 1 gamma	71	0	0	0.5	0	0.072	0.102	0.071	0
4855	NOTCH4	notch receptor 4	110	0	0.5	0	0	0.07	0.096	0.071	0
8867	SYNJ1	synaptojanin 1	140	0	0	0.5	0	0.067	0.086	0.071	0
9616	RNF7	ring finger protein 7	302	0	1	0.5	0	0.072	0.103	0.071	0
6331	SCN5A	sodium voltage-gated channel alpha subunit 5	29	0	0	0.5	0	0.069	0.092	0.071	0
5793	PTPRG	protein tyrosine phosphatase receptor type G	4	0	0	0.5	0	0.065	0.082	0.071	0
6336	SCN10A	sodium voltage-gated channel alpha subunit 10	23	0	0	0	0	0.065	0.08	0.071	0
22976	PAXIP1	PAX interacting protein 1	108	0	0	0	0	0.069	0.093	0.071	0
9133	CCNB2	cyclin B2	256	0	0	0	0	0.081	0.134	0.071	0
92815	HIST3H2A	histone cluster 3 H2A	163	0	0	0	0	0.075	0.115	0.071	0
23635	SSBP2	single stranded DNA binding protein 2	10	0	0	0	0	0.079	0.127	0.071	0
55746	NUP133	nucleoporin 133	231	0	0	0	0	0.072	0.105	0.071	0
55814	BDP1	B double prime 1, subunit of RNA polymerase III transcription initiation factor IIIB	45	0	0	0	0	0.069	0.095	0.071	0
4804	NGFR	nerve growth factor receptor	91	0	0	0	0	0.076	0.118	0.071	0
55905	RNF114	ring finger protein 114	258	0	0	0	0	0.068	0.092	0.071	0
9734	HDAC9	histone deacetylase 9	68	0	0.5	0	0	0.069	0.094	0.071	0
196528	ARID2	AT-rich interaction domain 2	30	0	0	0.5	0	0.068	0.093	0.07	0
79682	CENPU	centromere protein U	164	0	0	0	0	0.063	0.076	0.07	0
7091	TLE4	TLE family member 4, transcriptional corepressor	50	0	0	0	0	0.069	0.096	0.07	0
3710	ITPR3	inositol 1,4,5-trisphosphate receptor type 3	84	0	0	0	0	0.068	0.094	0.07	0
1856	DVL2	dishevelled segment polarity protein 2	249	0	0	0	0	0.082	0.14	0.07	0
10419	PRMT5	protein arginine methyltransferase 5	80	0	0	0	0	0.068	0.092	0.07	0
26232	FBXO2	F-box protein 2	302	0	0	0	0	0.068	0.094	0.07	0
25898	RCHY1	ring finger and CHY zinc finger domain containing 1	270	0	0.5	0	0	0.064	0.081	0.07	0
9739	SETD1A	SET domain containing 1A, histone lysine methyltransferase	61	0	0	0.5	0	0.067	0.09	0.07	0
894	CCND2	cyclin D2	74	0	0	0	0	0.064	0.081	0.07	0
23608	MKRN1	makorin ring finger protein 1	260	0	0.5	0	0	0.063	0.077	0.07	0
10254	STAM2	signal transducing adaptor molecule 2	160	0	0	0	0	0.073	0.11	0.07	0
7428	VHL	von Hippel-Lindau tumor suppressor	358	0	1	0.5	0	0.07	0.1	0.07	0
9817	KEAP1	kelch like ECH associated protein 1	308	0	0	0	0	0.07	0.101	0.07	0
5915	RARB	retinoic acid receptor beta	79	0	0	0	0	0.065	0.083	0.07	0
2020	EN2	engrailed homeobox 2	2	0	0	0	0	0.063	0.079	0.07	0
65263	PYCR3	pyrroline-5-carboxylate reductase 3	10	0	0	0	0	0.072	0.106	0.07	0
140739	UBE2F	ubiquitin conjugating enzyme E2 F (putative)	290	0	0	0	0	0.069	0.096	0.07	0
3897	L1CAM	L1 cell adhesion molecule	60	0	0	0	0	0.072	0.106	0.07	0
6456	SH3GL2	SH3 domain containing GRB2 like 2, endophilin A1	183	0	0	0	0	0.071	0.105	0.07	0
274	BIN1	bridging integrator 1	125	0	0	0	0	0.066	0.087	0.07	0
7320	UBE2B	ubiquitin conjugating enzyme E2 B	314	0	0	0	0	0.072	0.107	0.07	0
29945	ANAPC4	anaphase promoting complex subunit 4	353	0	0	0	0	0.072	0.108	0.07	0
4303	FOXO4	forkhead box O4	44	0	0	0	0	0.063	0.08	0.07	0
8648	NCOA1	nuclear receptor coactivator 1	169	0	0	1	0	0.086	0.154	0.069	0
1026	CDKN1A	cyclin dependent kinase inhibitor 1A	164	0	0	0	0	0.075	0.117	0.069	0
6047	RNF4	ring finger protein 4	293	0	0	0	0	0.068	0.096	0.069	0
10232	MSLN	mesothelin	179	0	0	0	0	0.079	0.131	0.069	0
7022	TFAP2C	transcription factor AP-2 gamma	25	0	0	0	0	0.072	0.109	0.069	0
7324	UBE2E1	ubiquitin conjugating enzyme E2 E1	350	0	0	0	0	0.072	0.11	0.069	0
2960	GTF2E1	general transcription factor IIE subunit 1	135	0	0	0	0	0.069	0.1	0.069	0
22796	COG2	component of oligomeric golgi complex 2	112	0	0	0	0	0.067	0.093	0.069	0
5604	MAP2K1	mitogen-activated protein kinase kinase 1	147	0	0	0.5	0	0.073	0.112	0.069	0
26234	FBXL5	F-box and leucine rich repeat protein 5	312	0	0	0	0	0.067	0.093	0.069	0
3371	TNC	tenascin C	126	0	0	0	0	0.063	0.081	0.069	0
5293	PIK3CD	phosphatidylinositol-4,5-bisphosphate 3-kinase catalytic subunit delta	119	0	0	1	0	0.071	0.108	0.069	0
84661	DPY30	dpy-30 histone methyltransferase complex regulatory subunit	63	0	0	0	0	0.07	0.104	0.069	0
8193	DPF1	double PHD fingers 1	12	0	0	0	0	0.062	0.077	0.069	0
401541	CENPP	centromere protein P	138	0	0	0	0	0.06	0.072	0.069	0
3312	HSPA8	heat shock protein family A (Hsp70) member 8	425	0	0	0	0	0.091	0.177	0.069	0
7155	TOP2B	DNA topoisomerase II beta	20	0	0	1	0	0.063	0.08	0.069	0
57572	DOCK6	dedicator of cytokinesis 6	4	0	0	0	0	0.079	0.134	0.069	0
53822	FXYD7	FXYD domain containing ion transport regulator 7	7	0	0	0	0	0.068	0.099	0.069	0
546	ATRX	ATRX chromatin remodeler	10	0	0	1	0	0.068	0.096	0.069	0
6198	RPS6KB1	ribosomal protein S6 kinase B1	98	0	0	0	0	0.065	0.089	0.069	0
2308	FOXO1	forkhead box O1	62	0	0.5	0.5	0	0.067	0.095	0.069	0
4683	NBN	nibrin	154	0	0	0.5	0	0.068	0.099	0.069	0
54620	FBXL19	F-box and leucine rich repeat protein 19	336	0	1	0	0	0.069	0.102	0.069	0
3211	HOXB1	homeobox B1	66	0	0.5	0.5	0	0.061	0.075	0.069	0
1063	CENPF	centromere protein F	168	0	0	0	0	0.067	0.094	0.069	0
1629	DBT	dihydrolipoamide branched chain transacylase E2	48	0	0	0.5	0	0.076	0.127	0.069	0
6932	TCF7	transcription factor 7	66	0	0	0	0	0.07	0.105	0.068	0
3908	LAMA2	laminin subunit alpha 2	47	0	1	0	0	0.066	0.092	0.068	0
5924	RASGRF2	Ras protein specific guanine nucleotide releasing factor 2	39	0	0	0	0	0.068	0.099	0.068	0
6049	RNF6	ring finger protein 6	256	0	0	0.5	0	0.061	0.076	0.068	0
6477	SIAH1	siah E3 ubiquitin protein ligase 1	273	0	0	0.5	0	0.065	0.089	0.068	0
9437	NCR1	natural cytotoxicity triggering receptor 1	17	0	0	0	0	0.062	0.08	0.068	0
55835	CENPJ	centromere protein J	133	0	0.5	0	0	0.07	0.107	0.068	0
9169	SCAF11	SR-related CTD associated factor 11	8	0	0	0	0	0.064	0.084	0.068	0
5533	PPP3CC	protein phosphatase 3 catalytic subunit gamma	47	0	0	0	0	0.073	0.115	0.068	0
84541	KBTBD8	kelch repeat and BTB domain containing 8	296	0	0	0	0	0.07	0.106	0.068	0
53828	FXYD4	FXYD domain containing ion transport regulator 4	7	0	0	0	0	0.068	0.101	0.068	0
6453	ITSN1	intersectin 1	159	0	0.5	0	0	0.072	0.112	0.068	0
3297	HSF1	heat shock transcription factor 1	43	0	0.5	0	0	0.068	0.098	0.068	0
79084	WDR77	WD repeat domain 77	76	0	0	0	0	0.066	0.094	0.068	0
55166	CENPQ	centromere protein Q	138	0	0.5	0	0	0.06	0.074	0.068	0
5584	PRKCI	protein kinase C iota	51	0	0	0	0	0.064	0.087	0.068	0
3020	H3F3A	H3 histone family member 3A	89	0	0	0	0	0.069	0.105	0.068	0
84441	MAML2	mastermind like transcriptional coactivator 2	70	0	0.5	0	0	0.066	0.092	0.068	0
91949	COG7	component of oligomeric golgi complex 7	112	0	0	0	0	0.067	0.097	0.068	0
51619	UBE2D4	ubiquitin conjugating enzyme E2 D4 (putative)	269	0	0	0	0	0.066	0.095	0.068	0
9513	FXR2	FMR1 autosomal homolog 2	27	0	0	0	0	0.064	0.088	0.068	0
10672	GNA13	G protein subunit alpha 13	96	0	0	0.5	0	0.062	0.081	0.068	0
55143	CDCA8	cell division cycle associated 8	220	0	0	0	0	0.072	0.114	0.068	0
85369	STRIP1	striatin interacting protein 1	26	0	0	0	0	0.066	0.094	0.068	0
5688	PSMA7	proteasome subunit alpha 7	229	0	0	0	0	0.07	0.107	0.068	0
154214	RNF217	ring finger protein 217	256	0	0	0	0	0.061	0.078	0.068	0
369	ARAF	A-Raf proto-oncogene, serine/threonine kinase	87	0	0	0	0	0.068	0.1	0.068	0
10733	PLK4	polo like kinase 4	157	0	0	0	0	0.07	0.109	0.068	0
5569	PKIA	cAMP-dependent protein kinase inhibitor alpha	7	0	0	1	0	0.071	0.112	0.068	0
143279	HECTD2	HECT domain E3 ubiquitin protein ligase 2	257	0	0	0	0	0.062	0.083	0.068	0
54930	HAUS4	HAUS augmin like complex subunit 4	114	0	0	0	0	0.061	0.079	0.067	0
84078	KBTBD7	kelch repeat and BTB domain containing 7	299	0	0	0	0	0.066	0.094	0.067	0
1058	CENPA	centromere protein A	231	0	0	0	0	0.072	0.115	0.067	0
25831	HECTD1	HECT domain E3 ubiquitin protein ligase 1	258	0	0	0	0	0.066	0.094	0.067	0
161	AP2A2	adaptor related protein complex 2 subunit alpha 2	211	0	1	0	0	0.076	0.129	0.067	0
6861	SYT5	synaptotagmin 5	15	0	0	0	0	0.062	0.082	0.067	0
23353	SUN1	Sad1 and UNC84 domain containing 1	53	0	0	0	0	0.058	0.068	0.067	0
899	CCNF	cyclin F	306	0	0	0	0	0.067	0.099	0.067	0
55193	PBRM1	polybromo 1	48	0	0	0	0	0.064	0.089	0.067	0
5878	RAB5C	RAB5C, member RAS oncogene family	274	0	0	0	0	0.085	0.162	0.067	0
55336	FBXL8	F-box and leucine rich repeat protein 8	296	0	0	0	0	0.064	0.089	0.067	0
55559	HAUS7	HAUS augmin like complex subunit 7	114	0	0	0.5	0	0.061	0.08	0.067	0
9382	COG1	component of oligomeric golgi complex 1	112	0	0	0	0	0.067	0.1	0.067	0
10163	WASF2	WASP family member 2	62	0	0	0	0	0.064	0.089	0.067	0
29954	POMT2	protein O-mannosyltransferase 2	4	0	0	0	0	0.078	0.137	0.067	0
5913	RAPSN	receptor associated protein of the synapse	36	0	0	0	0	0.06	0.078	0.067	0
3709	ITPR2	inositol 1,4,5-trisphosphate receptor type 2	83	0	0	0	0	0.068	0.103	0.067	0
7074	TIAM1	T cell lymphoma invasion and metastasis 1	60	0	0	0	0	0.063	0.087	0.067	0
10013	HDAC6	histone deacetylase 6	75	0	0	0	0	0.065	0.094	0.067	0
7090	TLE3	TLE family member 3, transcriptional corepressor	50	0	0	0	0	0.067	0.099	0.067	0
127544	RNF19B	ring finger protein 19B	256	0	0	0	0	0.061	0.081	0.067	0
255488	RNF144B	ring finger protein 144B	256	0	0	0.5	0	0.061	0.081	0.067	0
348995	NUP43	nucleoporin 43	234	0	0	0	0	0.076	0.131	0.067	0
142678	MIB2	mindbomb E3 ubiquitin protein ligase 2	264	0	0	0	0	0.066	0.098	0.067	0
9738	CCP110	centriolar coiled-coil protein 110	114	0	0	0	0	0.064	0.09	0.067	0
6921	ELOC	elongin C	435	0	0	0.5	0	0.079	0.143	0.067	0
6093	ROCK1	Rho associated coiled-coil containing protein kinase 1	69	0	0	1	0	0.069	0.107	0.067	0
80028	FBXL18	F-box and leucine rich repeat protein 18	296	0	0	0	0	0.064	0.091	0.067	0
4914	NTRK1	neurotrophic receptor tyrosine kinase 1	83	0	0	0	0	0.07	0.112	0.067	0
3092	HIP1	huntingtin interacting protein 1	119	0	0	0	0	0.061	0.082	0.067	0
54461	FBXW5	F-box and WD repeat domain containing 5	332	0	0	0	0	0.069	0.107	0.067	0
57144	PAK5	p21 (RAC1) activated kinase 5	48	0	0	0	0	0.064	0.091	0.066	0
114907	FBXO32	F-box protein 32	300	0	0	0.5	0	0.065	0.096	0.066	0
54442	KCTD5	potassium channel tetramerization domain containing 5	3	0	0	0	0	0.085	0.166	0.066	0
8844	KSR1	kinase suppressor of ras 1	83	0	0	0	0	0.062	0.086	0.066	0
84612	PARD6B	par-6 family cell polarity regulator beta	14	0	0	0	0	0.068	0.106	0.066	0
63893	UBE2O	ubiquitin conjugating enzyme E2 O	258	0	0	0.5	0	0.066	0.1	0.066	0
163	AP2B1	adaptor related protein complex 2 subunit beta 1	175	0	0.5	0	0	0.072	0.12	0.066	0
23014	FBXO21	F-box protein 21	296	0	0	0.5	0	0.064	0.092	0.066	0
57511	COG6	component of oligomeric golgi complex 6	112	0	0	0	0	0.067	0.103	0.066	0
26249	KLHL3	kelch like family member 3	295	0	0	0	0	0.064	0.092	0.066	0
84727	SPSB2	splA/ryanodine receptor domain and SOCS box containing 2	295	0	0	0	0	0.064	0.092	0.066	0
10046	MAMLD1	mastermind like domain containing 1	68	0	0	0	0	0.065	0.096	0.066	0
27289	RND1	Rho family GTPase 1	25	0	0	0	0	0.064	0.092	0.066	0
5116	PCNT	pericentrin	114	0	0	0	0	0.061	0.083	0.066	0
9672	SDC3	syndecan 3	91	0	0	0	0	0.08	0.148	0.066	0
8218	CLTCL1	clathrin heavy chain like 1	134	0	0	0	0	0.064	0.092	0.066	0
7013	TERF1	telomeric repeat binding factor 1	63	0	0	0	0	0.059	0.076	0.066	0
1386	ATF2	activating transcription factor 2	158	0	0.5	0	0	0.074	0.13	0.066	0
57545	CC2D2A	coiled-coil and C2 domain containing 2A	98	0	0	0	0	0.058	0.074	0.066	0
6455	SH3GL1	SH3 domain containing GRB2 like 1, endophilin A2	134	0	0	0.5	0	0.063	0.091	0.066	0
55558	PLXNA3	plexin A3	30	0	0	0	0	0.066	0.1	0.066	0
115290	FBXO17	F-box protein 17	300	0	0	0	0	0.065	0.098	0.066	0
7881	KCNAB1	potassium voltage-gated channel subfamily A member regulatory beta subunit 1	39	0	0	0	0	0.098	0.214	0.066	0
18	ABAT	4-aminobutyrate aminotransferase	36	0	0	0.5	0	0.071	0.118	0.066	0
10585	POMT1	protein O-mannosyltransferase 1	4	0	0	0	0	0.078	0.142	0.066	0
22938	SNW1	SNW domain containing 1	272	0	0	0.5	0	0.074	0.129	0.066	0
89910	UBE3B	ubiquitin protein ligase E3B	256	0	0	1	0	0.061	0.084	0.066	0
90025	UBE3D	ubiquitin protein ligase E3D	256	0	0	0	0	0.061	0.084	0.066	0
8453	CUL2	cullin 2	355	0	0	0	0	0.069	0.113	0.066	0
5605	MAP2K2	mitogen-activated protein kinase kinase 2	109	0	0	0	0	0.065	0.098	0.066	0
29117	BRD7	bromodomain containing 7	35	0	0	0	0	0.057	0.071	0.066	0
5091	PC	pyruvate carboxylase	53	0	0.5	0	0	0.074	0.128	0.066	0
10445	MCRS1	microspherule protein 1	66	0	0	0	0	0.065	0.096	0.066	0
3622	ING2	inhibitor of growth family member 2	51	0	0	0.5	0	0.067	0.105	0.066	0
116519	APOA5	apolipoprotein A5	145	0	0	0	0	0.072	0.122	0.066	0
105369632	LOC105369632	uncharacterized LOC105369632	295	0	0	0	0	0.064	0.094	0.066	0
10806	SDCCAG8	serologically defined colon cancer antigen 8	114	0	0	0	0	0.061	0.085	0.066	0
54801	HAUS6	HAUS augmin like complex subunit 6	114	0	0	0	0	0.061	0.085	0.066	0
57504	MTA3	metastasis associated 1 family member 3	113	0	0	0	0	0.066	0.101	0.065	0
84915	FAM222A	family with sequence similarity 222 member A	5	0	0	0	0	0.062	0.089	0.065	0
26270	FBXO6	F-box protein 6	309	0	0	0.5	0	0.067	0.105	0.065	0
6468	FBXW4	F-box and WD repeat domain containing 4	307	0	0	0	0	0.066	0.101	0.065	0
80152	CENPT	centromere protein T	138	0	0	0	0	0.06	0.082	0.065	0
84342	COG8	component of oligomeric golgi complex 8	113	0	0	0	0	0.067	0.106	0.065	0
10006	ABI1	abl interactor 1	68	0	0	0.5	0	0.063	0.093	0.065	0
8916	HERC3	HECT and RLD domain containing E3 ubiquitin protein ligase 3	257	0	0	0	0	0.062	0.09	0.065	0
23523	CABIN1	calcineurin binding protein 1	40	0	0	0.5	0	0.072	0.125	0.065	0
7804	LRP8	LDL receptor related protein 8	39	0	0	0.5	0	0.061	0.085	0.065	0
4660	PPP1R12B	protein phosphatase 1 regulatory subunit 12B	29	0	0	0.5	0	0.058	0.075	0.065	0
7704	ZBTB16	zinc finger and BTB domain containing 16	296	0	0	1	0	0.064	0.096	0.065	0
51465	UBE2J1	ubiquitin conjugating enzyme E2 J1	259	0	0	0.5	0	0.062	0.088	0.065	0
9026	HIP1R	huntingtin interacting protein 1 related	157	0	0	0.5	0	0.067	0.106	0.065	0
51343	FZR1	fizzy and cell division cycle 20 related 1	338	0	0	0	0	0.071	0.12	0.065	0
6850	SYK	spleen associated tyrosine kinase	170	0	1	0.5	0	0.078	0.147	0.065	0
4792	NFKBIA	NFKB inhibitor alpha	160	0	0	0.5	0	0.071	0.123	0.065	0
4735	SEPT2	septin 2	110	0	0	0.5	0	0.07	0.118	0.065	0
26272	FBXO4	F-box protein 4	309	0	0	0	0	0.067	0.107	0.065	0
29116	MYLIP	myosin regulatory light chain interacting protein	258	0	0	0.5	0	0.062	0.09	0.065	0
9787	DLGAP5	DLG associated protein 5	123	0	0	0	0	0.065	0.102	0.065	0
51256	TBC1D7	TBC1 domain family member 7	17	0	0	0.5	0	0.055	0.067	0.065	0
122769	LRR1	leucine rich repeat protein 1	295	0	0.5	0	0	0.064	0.097	0.065	0
93611	FBXO44	F-box protein 44	300	0	0.5	0.5	0	0.065	0.102	0.065	0
2811	GP1BA	glycoprotein Ib platelet subunit alpha	70	0	0.5	0.5	0	0.063	0.094	0.065	0
9196	KCNAB3	potassium voltage-gated channel subfamily A regulatory beta subunit 3	39	0	0	0	0	0.098	0.22	0.065	0
8027	STAM	signal transducing adaptor molecule	164	0	0	0	0	0.073	0.131	0.065	0
3558	IL2	interleukin 2	88	0	0	0	0	0.062	0.092	0.065	0
170463	SSBP4	single stranded DNA binding protein 4	12	0	0	0	0	0.079	0.153	0.065	0
4734	NEDD4	neural precursor cell expressed, developmentally down-regulated 4, E3 ubiquitin protein ligase	269	0	0	0	0	0.065	0.101	0.065	0
5349	FXYD3	FXYD domain containing ion transport regulator 3	7	0	0	0	0	0.068	0.114	0.065	0
9575	CLOCK	clock circadian regulator	40	0	0	0	0	0.076	0.14	0.065	0
84937	ZNRF1	zinc and ring finger 1	256	0	0	0	0	0.061	0.088	0.065	0
9475	ROCK2	Rho associated coiled-coil containing protein kinase 2	64	0	0.5	1	0	0.065	0.102	0.064	0
3021	H3F3B	H3 histone family member 3B	86	0	0.5	0	0	0.069	0.118	0.064	0
332	BIRC5	baculoviral IAP repeat containing 5	221	0	0	0	0	0.072	0.127	0.064	0
1144	CHRND	cholinergic receptor nicotinic delta subunit	8	0	0	0	0	0.07	0.121	0.064	0
115752	DIS3L	DIS3 like exosome 3'-5' exoribonuclease	25	0	0	0	0	0.062	0.093	0.064	0
1912	PHC2	polyhomeotic homolog 2	123	0	0	0.5	0	0.062	0.093	0.064	0
1021	CDK6	cyclin dependent kinase 6	73	0	0	0	0	0.059	0.082	0.064	0
93323	HAUS8	HAUS augmin like complex subunit 8	114	0	0.5	0	0	0.061	0.089	0.064	0
121441	NEDD1	neural precursor cell expressed, developmentally down-regulated 1	114	0	0	0	0	0.061	0.089	0.064	0
9423	NTN1	netrin 1	38	0	0	0	0	0.065	0.103	0.064	0
55142	HAUS2	HAUS augmin like complex subunit 2	115	0	0	0.5	0	0.061	0.089	0.064	0
79019	CENPM	centromere protein M	167	0	1	0.5	0	0.063	0.096	0.064	0
55958	KLHL9	kelch like family member 9	302	0	0	0	0	0.065	0.104	0.064	0
90293	KLHL13	kelch like family member 13	302	0	0	0	0	0.065	0.104	0.064	0
5465	PPARA	peroxisome proliferator activated receptor alpha	101	0	0	0	0	0.069	0.119	0.064	0
54874	FNBP1L	formin binding protein 1 like	120	0	0	0	0	0.062	0.092	0.064	0
7321	UBE2D1	ubiquitin conjugating enzyme E2 D1	468	0	0	0.5	0	0.086	0.178	0.064	0
1747	DLX3	distal-less homeobox 3	2	0	0	0	0	0.063	0.097	0.064	0
116443	GRIN3A	glutamate ionotropic receptor NMDA type subunit 3A	23	0	0	0	0	0.061	0.089	0.064	0
29920	PYCR2	pyrroline-5-carboxylate reductase 2	12	0	0	0	0	0.069	0.118	0.064	0
23063	WAPL	WAPL cohesin release factor	112	0	0	0.5	0	0.062	0.091	0.064	0
2185	PTK2B	protein tyrosine kinase 2 beta	78	0	1	0.5	0	0.062	0.094	0.064	0
27127	SMC1B	structural maintenance of chromosomes 1B	57	0	0	0	0	0.057	0.075	0.064	0
4361	MRE11	MRE11 homolog, double strand break repair nuclease	159	0	0	0	0	0.068	0.116	0.064	0
3569	IL6	interleukin 6	168	0	0	0	0	0.067	0.111	0.064	0
8535	CBX4	chromobox 4	127	0	0	0.5	0	0.063	0.096	0.064	0
324	APC	APC regulator of WNT signaling pathway	129	0	0	0.5	0	0.067	0.112	0.064	0
5916	RARG	retinoic acid receptor gamma	84	0	0	0	0	0.063	0.095	0.064	0
1024	CDK8	cyclin dependent kinase 8	86	0	0	0	0	0.064	0.099	0.064	0
22832	CEP162	centrosomal protein 162	95	0	0	0	0	0.058	0.078	0.064	0
5291	PIK3CB	phosphatidylinositol-4,5-bisphosphate 3-kinase catalytic subunit beta	188	0	0	0.5	0	0.08	0.159	0.064	0
27252	KLHL20	kelch like family member 20	296	0	0	0.5	0	0.064	0.101	0.064	0
10477	UBE2E3	ubiquitin conjugating enzyme E2 E3	261	0	0	0.5	0	0.063	0.096	0.064	0
79885	HDAC11	histone deacetylase 11	53	0	0	0	0	0.061	0.089	0.064	0
84148	KAT8	lysine acetyltransferase 8	58	0	0	0	0	0.062	0.095	0.064	0
2770	GNAI1	G protein subunit alpha i1	342	0	0	0.5	0	0.077	0.149	0.064	0
8636	SSNA1	SS nuclear autoantigen 1	114	0	0	0.5	0	0.061	0.091	0.064	0
10388	SYCP2	synaptonemal complex protein 2	53	0	0	0	0	0.057	0.075	0.064	0
283807	FBXL22	F-box and leucine rich repeat protein 22	296	0	0	0	0	0.064	0.101	0.064	0
126433	FBXO27	F-box protein 27	300	0	0	0	0	0.065	0.106	0.064	0
140691	TRIM69	tripartite motif containing 69	257	0	0	0	0	0.061	0.092	0.064	0
9870	AREL1	apoptosis resistant E3 ubiquitin protein ligase 1	256	0	0	0	0	0.061	0.091	0.064	0
79654	HECTD3	HECT domain E3 ubiquitin protein ligase 3	256	0	0	0.5	0	0.061	0.091	0.064	0
57542	KLHL42	kelch like family member 42	295	0	0	0	0	0.064	0.101	0.064	0
10517	FBXW10	F-box and WD repeat domain containing 10	305	0	0	0	0	0.066	0.107	0.064	0
9444	QKI	QKI, KH domain containing RNA binding	81	0	0	0	0	0.062	0.094	0.064	0
729993	SHISA9	shisa family member 9	21	0	0	0	0	0.059	0.085	0.064	0
6519	SLC3A1	solute carrier family 3 member 1	1	0	0	0	0	0.071	0.128	0.064	0
9657	IQCB1	IQ motif containing B1	96	0	0	0.5	0	0.059	0.082	0.064	0
23648	SSBP3	single stranded DNA binding protein 3	11	0	0.5	0.5	0	0.079	0.156	0.064	0
4534	MTM1	myotubularin 1	8	0	0	0	0	0.065	0.107	0.064	0
151636	DTX3L	deltex E3 ubiquitin ligase 3L	259	0	0.5	0.5	0	0.061	0.092	0.064	0
118424	UBE2J2	ubiquitin conjugating enzyme E2 J2	260	0	0	0	0	0.062	0.093	0.064	0
378708	CENPS	centromere protein S	179	0	0	0	0	0.066	0.109	0.063	0
55845	BRK1	BRICK1 subunit of SCAR/WAVE actin nucleating complex	52	0	0	0.5	0	0.059	0.086	0.063	0
2060	EPS15	epidermal growth factor receptor pathway substrate 15	136	0	0	0.5	0	0.066	0.11	0.063	0
140458	ASB5	ankyrin repeat and SOCS box containing 5	296	0	0	0	0	0.064	0.102	0.063	0
51725	FBXO40	F-box protein 40	296	0	0	0	0	0.064	0.102	0.063	0
701	BUB1B	BUB1 mitotic checkpoint serine/threonine kinase B	287	0	0	0.5	0	0.076	0.147	0.063	0
117177	RAB3IP	RAB3A interacting protein	123	0	0	0.5	0	0.065	0.107	0.063	0
55175	KLHL11	kelch like family member 11	295	0	0	0	0	0.064	0.102	0.063	0
10425	ARIH2	ariadne RBR E3 ubiquitin protein ligase 2	256	0	0	0	0	0.061	0.092	0.063	0
341359	SYT10	synaptotagmin 10	5	0	0.5	0	0	0.072	0.131	0.063	0
64105	CENPK	centromere protein K	138	0	0.5	0	0	0.06	0.089	0.063	0
6811	STX5	syntaxin 5	151	0	0	0	0	0.068	0.116	0.063	0
57057	TBX20	T-box 20	4	0	0	0	0	0.089	0.195	0.063	0
57332	CBX8	chromobox 8	123	0	0	0	0	0.062	0.097	0.063	0
84733	CBX2	chromobox 2	123	0	0	0	0	0.062	0.097	0.063	0
26145	IRF2BP1	interferon regulatory factor 2 binding protein 1	6	0	0	0	0	0.078	0.156	0.063	0
3339	HSPG2	heparan sulfate proteoglycan 2	110	0	0	0	0	0.079	0.159	0.063	0
92912	UBE2Q2	ubiquitin conjugating enzyme E2 Q2	257	0	0	0	0	0.061	0.093	0.063	0
57551	TAOK1	TAO kinase 1	109	0	0	0	0	0.061	0.094	0.063	0
11190	CEP250	centrosomal protein 250	114	0	0	0	0	0.061	0.093	0.063	0
1213	CLTC	clathrin heavy chain	189	0	0	0.5	0	0.072	0.134	0.063	0
79754	ASB13	ankyrin repeat and SOCS box containing 13	296	0	0	0	0	0.064	0.103	0.063	0
[truncated: 10,740 more rows]

## Sheet: 2
gene_id	symbol	description	interactions	GEN	EPI	TRA	N evidences	d	p	dp	INT-MODULE	cluster
1778	DYNC1H1	dynein cytoplasmic 1 heavy chain 1	442	1	1	0.5	3	3.848	0.003	9.708	TRUE	7
2475	MTOR	mechanistic target of rapamycin kinase	107	1	1	0	2	3.169	0.001	9.508	TRUE	9
55904	KMT2E	lysine methyltransferase 2E	56	1	1	0.5	3	2.933	0.001	8.799	TRUE	8
4089	SMAD4	SMAD family member 4	167	1	0.5	0.5	3	3.309	0.003	8.349	TRUE	8
6934	TCF7L2	transcription factor 7 like 2	86	1	1	0	2	3.069	0.002	8.284	TRUE	8
6925	TCF4	transcription factor 4	36	1	1	0	2	2.731	0.001	8.193	TRUE	8
3198	HOXA1	homeobox A1	61	1	1	0	2	2.608	0.001	7.824	TRUE	8
23241	PACS2	phosphofurin acidic cluster sorting protein 2	2	1	1	0	2	2.514	0.001	7.541	TRUE	13
25942	SIN3A	SIN3 transcription regulator family member A	151	1	0	1	2	3.074	0.004	7.371	TRUE	8
1439	CSF2RB	colony stimulating factor 2 receptor beta common subunit	50	0	1	1	2	2.452	0.001	7.356	TRUE	3
6601	SMARCC2	SWI/SNF related, matrix associated, actin dependent regulator of chromatin subfamily c member 2	72	1	0.5	0.5	3	2.719	0.002	7.338	TRUE	8
7249	TSC2	TSC complex subunit 2	54	1	0.5	0	2	2.367	0.001	7.101	TRUE	9
5567	PRKACB	protein kinase cAMP-activated catalytic subunit beta	216	0.5	1	0	2	3.135	0.007	6.755	TRUE	3
6095	RORA	RAR related orphan receptor A	22	1	0.5	0.5	3	2.166	0.001	6.497	TRUE	8
22884	WDR37	WD repeat domain 37	2	0	0	0.5	1	2.157	0.001	6.47	TRUE	13
2033	EP300	E1A binding protein p300	505	1	0	0.5	2	3.35	0.014	6.21	TRUE	8
57492	ARID1B	AT-rich interaction domain 1B	32	1	1	0	2	2.296	0.002	6.198	TRUE	8
2185	PTK2B	protein tyrosine kinase 2 beta	78	0	1	0.5	2	2.416	0.003	6.095	TRUE	3
58508	KMT2C	lysine methyltransferase 2C	107	1	0	1	2	2.698	0.006	5.994	TRUE	8
8295	TRRAP	transformation/transcription domain associated protein	130	0.5	1	0.5	3	2.68	0.006	5.954	TRUE	8
1499	CTNNB1	catenin beta 1	365	1	0	0.5	2	3.252	0.016	5.839	TRUE	3
773	CACNA1A	calcium voltage-gated channel subunit alpha1 A	26	1	0.5	0	2	2.14	0.002	5.777	TRUE	2
90506	LRRC46	leucine rich repeat containing 46	1	0	0	0	0	2.281	0.003	5.756	TRUE	13
26523	AGO1	argonaute RISC component 1	166	1	0.5	0	2	2.631	0.007	5.67	TRUE	8
23067	SETD1B	SET domain containing 1B, histone lysine methyltransferase	58	1	0	1	2	2.23	0.003	5.627	TRUE	8
4208	MEF2C	myocyte enhancer factor 2C	73	1	0	1	2	2.527	0.006	5.615	TRUE	3
9611	NCOR1	nuclear receptor corepressor 1	200	1	0	0.5	2	2.857	0.011	5.596	TRUE	8
1523	CUX1	cut like homeobox 1	49	1	1	0.5	3	2.192	0.003	5.531	TRUE	7
6720	SREBF1	sterol regulatory element binding transcription factor 1	12	0	1	0.5	2	1.811	0.001	5.434	TRUE	9
6850	SYK	spleen associated tyrosine kinase	170	0	1	0.5	2	2.765	0.011	5.415	TRUE	3
5579	PRKCB	protein kinase C beta	155	1	0	0.5	2	2.561	0.008	5.37	TRUE	3
3932	LCK	LCK proto-oncogene, Src family tyrosine kinase	209	0.5	0.5	0.5	3	2.73	0.012	5.243	TRUE	3
25836	NIPBL	NIPBL cohesin loading factor	42	1	0	1	2	2.263	0.005	5.207	TRUE	7
5296	PIK3R2	phosphoinositide-3-kinase regulatory subunit 2	338	1	0.5	0	2	2.85	0.015	5.198	TRUE	3
5578	PRKCA	protein kinase C alpha	197	0.5	0.5	0.5	3	2.66	0.012	5.109	TRUE	3
5528	PPP2R5D	protein phosphatase 2 regulatory subunit B'delta	250	1	0	0.5	2	2.591	0.012	4.977	TRUE	7
8850	KAT2B	lysine acetyltransferase 2B	245	1	0	0.5	2	2.748	0.017	4.863	TRUE	8
57634	EP400	E1A binding protein p400	80	1	0.5	0.5	3	2.292	0.008	4.806	TRUE	8
60412	EXOC4	exocyst complex component 4	47	0.5	0.5	1	3	2.138	0.006	4.749	TRUE	5
604	BCL6	BCL6 transcription repressor	36	0	1	0.5	2	1.977	0.004	4.74	TRUE	3
3192	HNRNPU	heterogeneous nuclear ribonucleoprotein U	202	1	0	1	2	2.36	0.01	4.72	TRUE	5
9759	HDAC4	histone deacetylase 4	104	1	0.5	0	2	2.246	0.008	4.709	TRUE	8
5080	PAX6	paired box 6	62	1	0.5	0	2	2.112	0.006	4.692	TRUE	8
9320	TRIP12	thyroid hormone receptor interactor 12	265	1	0	1	2	2.459	0.013	4.639	TRUE	12
22941	SHANK2	SH3 and multiple ankyrin repeat domains 2	25	1	0.5	0	2	1.827	0.003	4.608	TRUE	11
83696	TRAPPC9	trafficking protein particle complex 9	71	1	0.5	0.5	3	1.993	0.005	4.586	TRUE	3
3326	HSP90AB1	heat shock protein 90 alpha family class B member 1	110	0	1	0.5	2	2.385	0.012	4.58	TRUE	7
2534	FYN	FYN proto-oncogene, Src family tyrosine kinase	290	0	0.5	1	2	2.829	0.025	4.533	TRUE	3
7528	YY1	YY1 transcription factor	133	1	0	0.5	2	2.36	0.012	4.532	TRUE	8
6261	RYR1	ryanodine receptor 1	41	0.5	1	0	2	1.883	0.004	4.516	TRUE	2
2290	FOXG1	forkhead box G1	6	1	1	0	2	1.5	0.001	4.501	TRUE	8
9939	RBM8A	RNA binding motif protein 8A	317	0	1	0.5	2	2.33	0.012	4.475	TRUE	5
7428	VHL	von Hippel-Lindau tumor suppressor	358	0	1	0.5	2	2.332	0.013	4.398	TRUE	12
2200	FBN1	fibrillin 1	120	1	0.5	0	2	2.233	0.011	4.374	TRUE	6
57520	HECW2	HECT, C2 and WW domain containing E3 ubiquitin protein ligase 2	256	1	0.5	0	2	2.318	0.013	4.371	TRUE	12
375	ARF1	ADP ribosylation factor 1	218	0	1	0.5	2	2.493	0.018	4.35	TRUE	10
2768	GNA12	G protein subunit alpha 12	73	0.5	1	0	2	2.081	0.009	4.258	TRUE	3
79019	CENPM	centromere protein M	167	0	1	0.5	2	2.238	0.013	4.221	TRUE	7
1107	CHD3	chromodomain helicase DNA binding protein 3	128	1	0	1	2	2.298	0.015	4.191	TRUE	8
23389	MED13L	mediator complex subunit 13 like	60	1	0.5	0	2	2.041	0.009	4.174	TRUE	8
5062	PAK2	p21 (RAC1) activated kinase 2	178	1	0	0.5	2	2.457	0.02	4.174	TRUE	3
4067	LYN	LYN proto-oncogene, Src family tyrosine kinase	191	0	1	0	1	2.388	0.018	4.166	TRUE	3
1453	CSNK1D	casein kinase 1 delta	294	0.5	0.5	0.5	3	2.485	0.022	4.12	TRUE	7
5885	RAD21	RAD21 cohesin complex component	175	1	0	0.5	2	2.394	0.02	4.067	TRUE	7
55284	UBE2W	ubiquitin conjugating enzyme E2 W	257	0	1	0.5	2	2.191	0.014	4.061	TRUE	12
57521	RPTOR	regulatory associated protein of MTOR complex 1	64	0	1	0	1	1.876	0.007	4.043	TRUE	9
10788	IQGAP2	IQ motif containing GTPase activating protein 2	11	0.5	0.5	1	3	1.46	0.002	3.94	TRUE	3
4650	MYO9B	myosin IXB	39	1	0.5	0.5	3	1.753	0.006	3.895	TRUE	5
11275	KLHL2	kelch like family member 2	295	0	1	0.5	2	2.228	0.018	3.887	TRUE	12
6597	SMARCA4	SWI/SNF related, matrix associated, actin dependent regulator of chromatin, subfamily a, member 4	84	1	0	0	1	1.983	0.011	3.883	TRUE	8
9369	NRXN3	neurexin 3	45	1	0	0	1	1.879	0.009	3.843	TRUE	11
2556	GABRA3	gamma-aminobutyric acid type A receptor alpha3 subunit	17	1	0	0	1	1.581	0.004	3.791	TRUE	4
10451	VAV3	vav guanine nucleotide exchange factor 3	108	0.5	0	1	2	2.142	0.017	3.79	TRUE	3
27071	DAPP1	dual adaptor of phosphotyrosine and 3-phosphoinositides 1	38	1	0	0.5	2	1.759	0.007	3.79	TRUE	3
1445	CSK	C-terminal Src kinase	134	0.5	0.5	0	2	2.112	0.017	3.738	TRUE	3
8912	CACNA1H	calcium voltage-gated channel subunit alpha1 H	34	1	0.5	0	2	1.68	0.006	3.734	TRUE	2
54413	NLGN3	neuroligin 3	28	1	0	0	1	1.68	0.006	3.732	TRUE	11
7325	UBE2E2	ubiquitin conjugating enzyme E2 E2	258	0	1	0.5	2	2.193	0.021	3.68	TRUE	12
8452	CUL3	cullin 3	366	1	0	0.5	2	2.237	0.023	3.665	TRUE	12
861	RUNX1	runt related transcription factor 1	162	0	0.5	0.5	2	2.259	0.024	3.659	TRUE	8
8720	MBTPS1	membrane bound transcription factor peptidase, site 1	117	0.5	0.5	0.5	3	2.061	0.017	3.648	TRUE	6
9616	RNF7	ring finger protein 7	302	0	1	0.5	2	2.263	0.025	3.625	TRUE	12
342371	ATXN1L	ataxin 1 like	2	0	1	0	1	1.68	0.007	3.621	TRUE	14
23332	CLASP1	cytoplasmic linker associated protein 1	211	1	0	0.5	2	2.254	0.025	3.612	TRUE	7
5868	RAB5A	RAB5A, member RAS oncogene family	215	0.5	0	1	2	2.3	0.027	3.608	TRUE	10
9475	ROCK2	Rho associated coiled-coil containing protein kinase 2	64	0	0.5	1	2	1.911	0.013	3.605	TRUE	3
64398	MPP5	membrane palmitoylated protein 5	17	0	1	0.5	2	1.602	0.006	3.559	TRUE	12
6429	SRSF4	serine and arginine rich splicing factor 4	225	0.5	0.5	0.5	3	2.167	0.023	3.55	TRUE	5
57502	NLGN4X	neuroligin 4 X-linked	27	1	0	0	1	1.688	0.008	3.539	TRUE	11
1496	CTNNA2	catenin alpha 2	28	1	0.5	0	2	1.621	0.007	3.493	TRUE	3
4638	MYLK	myosin light chain kinase	48	0.5	1	0	2	1.85	0.013	3.488	TRUE	3
4644	MYO5A	myosin VA	51	1	0	1	2	1.805	0.012	3.467	TRUE	5
23224	SYNE2	spectrin repeat containing nuclear envelope protein 2	53	0.5	1	0	2	1.765	0.011	3.457	TRUE	7
22871	NLGN1	neuroligin 1	27	1	0	0	1	1.688	0.009	3.453	TRUE	11
8924	HERC2	HECT and RLD domain containing E3 ubiquitin protein ligase 2	307	1	0	0.5	2	2.192	0.027	3.439	TRUE	12
5914	RARA	retinoic acid receptor alpha	106	0	1	0	1	1.98	0.019	3.408	TRUE	8
816	CAMK2B	calcium/calmodulin dependent protein kinase II beta	97	1	0	0	1	2.113	0.025	3.386	TRUE	3
2562	GABRB3	gamma-aminobutyric acid type A receptor beta3 subunit	15	1	0.5	0	2	1.571	0.007	3.385	TRUE	4
54806	AHI1	Abelson helper integration site 1	99	1	0	0.5	2	1.912	0.017	3.383	TRUE	7
5781	PTPN11	protein tyrosine phosphatase non-receptor type 11	259	1	0	0	1	2.379	0.038	3.379	TRUE	3
7248	TSC1	TSC complex subunit 1	60	1	0	0	1	1.751	0.012	3.364	TRUE	9
2035	EPB41	erythrocyte membrane protein band 4.1	16	0.5	0	1	2	1.459	0.005	3.358	TRUE	11
5252	PHF1	PHD finger protein 1	34	0.5	1	0	2	1.557	0.007	3.354	TRUE	8
95681	CEP41	centrosomal protein 41	117	1	0	0.5	2	1.946	0.019	3.35	TRUE	7
4306	NR3C2	nuclear receptor subfamily 3 group C member 2	36	1	0	0.5	2	1.552	0.007	3.345	TRUE	7
4763	NF1	neurofibromin 1	90	1	0	0.5	2	1.847	0.016	3.317	TRUE	1
9126	SMC3	structural maintenance of chromosomes 3	193	1	0	0	1	2.046	0.024	3.314	TRUE	7
91584	PLXNA4	plexin A4	31	1	0	0.5	2	1.605	0.009	3.283	TRUE	3
9378	NRXN1	neurexin 1	46	1	0	0	1	1.88	0.018	3.281	TRUE	11
4854	NOTCH3	notch receptor 3	83	0.5	0.5	0	2	1.93	0.02	3.279	TRUE	8
9229	DLGAP1	DLG associated protein 1	22	1	0	0	1	1.475	0.006	3.278	TRUE	11
6197	RPS6KA3	ribosomal protein S6 kinase A3	32	1	0	0.5	2	1.515	0.007	3.264	TRUE	9
79718	TBL1XR1	transducin beta like 1 X-linked receptor 1	113	1	0	0	1	2.011	0.024	3.257	TRUE	8
3707	ITPKB	inositol-trisphosphate 3-kinase B	28	0	0.5	1	2	1.572	0.009	3.216	TRUE	10
7204	TRIO	trio Rho guanine nucleotide exchange factor	178	1	0	1	2	1.94	0.022	3.215	TRUE	3
122553	TRAPPC6B	trafficking protein particle complex 6B	70	1	0.5	0.5	3	1.858	0.019	3.198	TRUE	3
9295	SRSF11	serine and arginine rich splicing factor 11	238	1	0	0.5	2	2.14	0.032	3.198	TRUE	5
4297	KMT2A	lysine methyltransferase 2A	94	1	0	0	1	1.927	0.022	3.195	TRUE	8
389541	LAMTOR4	late endosomal/lysosomal adaptor, MAPK and MTOR activator 4	33	0	1	0	1	1.557	0.009	3.184	TRUE	9
50944	SHANK1	SH3 and multiple ankyrin repeat domains 1	25	1	0	0	1	1.473	0.007	3.175	TRUE	11
30011	SH3KBP1	SH3 domain containing kinase binding protein 1	160	0.5	0	1	2	2.044	0.028	3.173	TRUE	10
6256	RXRA	retinoid X receptor alpha	238	0	0.5	0.5	2	2.247	0.039	3.166	TRUE	8
10142	AKAP9	A-kinase anchoring protein 9	207	1	0	0	1	2.167	0.035	3.155	TRUE	7
8928	FOXH1	forkhead box H1	7	0	1	0	1	1.169	0.002	3.154	TRUE	8
2904	GRIN2B	glutamate ionotropic receptor NMDA type subunit 2B	61	1	0	0	1	1.801	0.018	3.141	TRUE	3
4004	LMO1	LIM domain only 1	16	0	1	0.5	2	1.308	0.004	3.136	TRUE	8
22908	SACM1L	SAC1 like phosphatidylinositide phosphatase	31	0	1	0.5	2	1.601	0.011	3.135	TRUE	1
91687	CENPL	centromere protein L	138	0	0.5	1	2	1.955	0.025	3.131	TRUE	7
815	CAMK2A	calcium/calmodulin dependent protein kinase II alpha	78	1	0	0	1	1.923	0.024	3.114	TRUE	3
26053	AUTS2	activator of transcription and developmental regulator AUTS2	11	1	1	0	2	1.151	0.002	3.106	TRUE	8
6595	SMARCA2	SWI/SNF related, matrix associated, actin dependent regulator of chromatin, subfamily a, member 2	45	1	0	0	1	1.579	0.011	3.093	TRUE	8
7994	KAT6A	lysine acetyltransferase 6A	47	1	0	0.5	2	1.636	0.013	3.086	TRUE	8
2567	GABRG3	gamma-aminobutyric acid type A receptor gamma3 subunit	12	1	0	0	1	1.282	0.004	3.075	TRUE	4
3708	ITPR1	inositol 1,4,5-trisphosphate receptor type 1	89	0.5	0.5	0	2	1.897	0.024	3.072	TRUE	3
5245	PHB	prohibitin	27	1	0.5	0.5	3	1.465	0.008	3.072	TRUE	3
7812	CSDE1	cold shock domain containing E1	6	0.5	0.5	0.5	3	1.024	0.001	3.071	TRUE	5
7337	UBE3A	ubiquitin protein ligase E3A	290	1	0	0	1	2.073	0.035	3.018	TRUE	12
9021	SOCS3	suppressor of cytokine signaling 3	360	0.5	0	1	2	2.138	0.039	3.012	TRUE	12
2266	FGG	fibrinogen gamma chain	252	0	1	0	1	2.118	0.039	2.984	TRUE	6
8655	DYNLL1	dynein light chain LC8-type 1	467	0.5	0.5	0	2	2.428	0.06	2.967	TRUE	7
22854	NTNG1	netrin G1	67	1	1	0	2	1.652	0.016	2.966	TRUE	15
6009	RHEB	Ras homolog, mTORC1 binding	38	1	0	0	1	1.54	0.012	2.958	TRUE	9
207	AKT1	AKT serine/threonine kinase 1	256	0	0.5	0.5	2	2.362	0.056	2.957	TRUE	9
9612	NCOR2	nuclear receptor corepressor 2	155	0	0.5	0.5	2	2.046	0.036	2.953	TRUE	8
144165	PRICKLE1	prickle planar cell polarity protein 1	55	1	0.5	0	2	1.615	0.015	2.945	TRUE	1
53637	S1PR5	sphingosine-1-phosphate receptor 5	233	0	1	1	2	1.951	0.031	2.944	TRUE	3
23112	TNRC6B	trinucleotide repeat containing adaptor 6B	121	1	0	0	1	1.854	0.026	2.939	TRUE	8
29072	SETD2	SET domain containing 2, histone lysine methyltransferase	12	1	0	0	1	1.158	0.003	2.922	TRUE	7
8243	SMC1A	structural maintenance of chromosomes 1A	184	1	0	0	1	2.026	0.037	2.901	TRUE	7
2308	FOXO1	forkhead box O1	62	0	0.5	0.5	2	1.754	0.023	2.873	TRUE	8
55008	HERC6	HECT and RLD domain containing E3 ubiquitin protein ligase family member 6	272	0	1	0	1	1.9	0.031	2.866	TRUE	12
57680	CHD8	chromodomain helicase DNA binding protein 8	29	1	0	0.5	2	1.463	0.011	2.866	TRUE	5
54620	FBXL19	F-box and leucine rich repeat protein 19	336	0	1	0	1	1.946	0.034	2.858	TRUE	12
8289	ARID1A	AT-rich interaction domain 1A	66	0.5	0	0.5	2	1.648	0.019	2.836	TRUE	8
673	BRAF	B-Raf proto-oncogene, serine/threonine kinase	114	1	0	0	1	1.913	0.033	2.835	TRUE	3
286	ANK1	ankyrin 1	111	0	0.5	0.5	2	1.74	0.024	2.818	TRUE	7
5928	RBBP4	RB binding protein 4, chromatin remodeling factor	280	0.5	0	0.5	2	2.236	0.055	2.816	TRUE	8
10274	STAG1	stromal antigen 1	171	1	0	0	1	1.987	0.039	2.799	TRUE	7
988	CDC5L	cell division cycle 5 like	586	0	0.5	0	1	2.923	0.112	2.779	TRUE	5
9557	CHD1L	chromodomain helicase DNA binding protein 1 like	65	0.5	1	0	2	1.675	0.022	2.776	TRUE	5
8408	ULK1	unc-51 like autophagy activating kinase 1	51	0.5	0.5	0	2	1.591	0.018	2.775	TRUE	9
5253	PHF2	PHD finger protein 2	2	1	0	0.5	2	0.924	0.001	2.772	TRUE	15
83593	RASSF5	Ras association domain family member 5	26	0	1	1	2	1.468	0.013	2.769	TRUE	15
5611	DNAJC3	DnaJ heat shock protein family (Hsp40) member C3	211	0	0.5	1	2	2.095	0.048	2.763	TRUE	6
7403	KDM6A	lysine demethylase 6A	82	1	0	0	1	1.738	0.026	2.755	TRUE	8
652	BMP4	bone morphogenetic protein 4	143	0	1	0	1	1.791	0.029	2.754	TRUE	6
26512	INTS6	integrator complex subunit 6	85	1	0	0.5	2	1.68	0.023	2.753	TRUE	7
1788	DNMT3A	DNA methyltransferase 3 alpha	77	1	0	0	1	1.632	0.021	2.738	TRUE	8
6092	ROBO2	roundabout guidance receptor 2	30	1	0	0	1	1.397	0.011	2.737	TRUE	3
54812	AFTPH	aftiphilin	54	0	1	0.5	2	1.568	0.018	2.736	TRUE	10
6427	SRSF2	serine and arginine rich splicing factor 2	232	0	1	0	1	1.905	0.037	2.727	TRUE	5
146330	FBXL16	F-box and leucine rich repeat protein 16	296	0	1	0	1	1.886	0.036	2.723	TRUE	12
5364	PLXNB1	plexin B1	26	1	0	0	1	1.345	0.01	2.69	TRUE	3
10726	NUDC	nuclear distribution C, dynein complex regulator	113	0	1	0	1	1.798	0.032	2.687	TRUE	7
23426	GRIP1	glutamate receptor interacting protein 1	26	1	0	0	1	1.343	0.01	2.686	TRUE	3
146057	TTBK2	tau tubulin kinase 2	96	0	1	0	1	1.636	0.023	2.68	TRUE	7
777	CACNA1E	calcium voltage-gated channel subunit alpha1 E	39	1	0	0	1	1.461	0.015	2.665	TRUE	2
5982	RFC2	replication factor C subunit 2	168	0.5	0.5	0.5	3	1.931	0.042	2.659	TRUE	5
51366	UBR5	ubiquitin protein ligase E3 component n-recognin 5	10	1	0	1	2	1.297	0.009	2.654	TRUE	7
3690	ITGB3	integrin subunit beta 3	200	1	0	0	1	2.112	0.056	2.644	TRUE	3
774	CACNA1B	calcium voltage-gated channel subunit alpha1 B	37	0	1	0	1	1.472	0.016	2.644	TRUE	2
8379	MAD1L1	mitotic arrest deficient 1 like 1	108	0	1	0	1	1.785	0.033	2.644	TRUE	7
55898	UNC45A	unc-45 myosin chaperone A	14	0	1	0	1	1.183	0.006	2.629	TRUE	5
805	CALM2	calmodulin 2	71	0	0.5	0	1	1.765	0.033	2.614	TRUE	2
3628	INPP1	inositol polyphosphate-1-phosphatase	15	0	1	0	1	1.135	0.005	2.612	TRUE	10
4952	OCRL	OCRL inositol polyphosphate-5-phosphatase	190	1	0	0	1	2.016	0.051	2.605	TRUE	10
161	AP2A2	adaptor related protein complex 2 subunit alpha 2	211	0	1	0	1	1.959	0.047	2.601	TRUE	10
1399	CRKL	CRK like proto-oncogene, adaptor protein	106	0.5	0	0.5	2	1.786	0.035	2.6	TRUE	3
287	ANK2	ankyrin 2	108	1	0	0	1	1.738	0.032	2.598	TRUE	7
4602	MYB	MYB proto-oncogene, transcription factor	54	0.5	0	0.5	2	1.706	0.03	2.598	TRUE	8
161882	ZFPM1	zinc finger protein, FOG family member 1	70	0	0.5	0.5	2	1.638	0.026	2.596	TRUE	8
56975	FAM20C	FAM20C golgi associated secretory pathway kinase	108	0	1	0	1	1.677	0.029	2.578	TRUE	6
23020	SNRNP200	small nuclear ribonucleoprotein U5 subunit 200	223	0	1	0	1	1.898	0.044	2.574	TRUE	5
6531	SLC6A3	solute carrier family 6 member 3	13	1	0	0	1	1.119	0.005	2.574	TRUE	3
527	ATP6V0C	ATPase H+ transporting V0 subunit c	149	0	1	0.5	2	1.906	0.045	2.567	TRUE	7
23152	CIC	capicua transcriptional repressor	2	1	0	0	1	1.381	0.014	2.56	TRUE	14
26046	LTN1	listerin E3 ubiquitin protein ligase 1	284	0	1	0	1	1.886	0.044	2.558	TRUE	12
8812	CCNK	cyclin K	141	1	0	0.5	2	1.742	0.034	2.558	TRUE	7
6812	STXBP1	syntaxin binding protein 1	27	1	0	0	1	1.379	0.014	2.557	TRUE	2
23345	SYNE1	spectrin repeat containing nuclear envelope protein 1	53	1	0	0.5	2	1.56	0.023	2.556	TRUE	7
7468	NSD2	nuclear receptor binding SET domain protein 2	57	0.5	1	0	2	1.623	0.027	2.546	TRUE	12
2890	GRIA1	glutamate ionotropic receptor AMPA type subunit 1	113	1	0	0	1	1.763	0.036	2.545	TRUE	3
261734	NPHP4	nephrocystin 4	99	0	1	0	1	1.685	0.031	2.542	TRUE	7
775	CACNA1C	calcium voltage-gated channel subunit alpha1 C	82	1	0	0	1	1.728	0.034	2.537	TRUE	2
5728	PTEN	phosphatase and tensin homolog	145	1	0	0	1	1.896	0.046	2.536	TRUE	1
776	CACNA1D	calcium voltage-gated channel subunit alpha1 D	73	1	0	0	1	1.648	0.029	2.534	TRUE	2
51196	PLCE1	phospholipase C epsilon 1	27	0	1	0	1	1.264	0.01	2.528	TRUE	3
10458	BAIAP2	BAI1 associated protein 2	59	0.5	0.5	0	2	1.605	0.027	2.517	TRUE	3
51429	SNX9	sorting nexin 9	149	0.5	0.5	0	2	1.786	0.039	2.516	TRUE	10
55023	PHIP	pleckstrin homology domain interacting protein	8	1	0	0.5	2	1.131	0.006	2.513	TRUE	7
3778	KCNMA1	potassium calcium-activated channel subfamily M alpha 1	14	0	1	0	1	1.283	0.011	2.512	TRUE	3
10466	COG5	component of oligomeric golgi complex 5	113	0	1	0	1	1.759	0.038	2.498	TRUE	7
4233	MET	MET proto-oncogene, receptor tyrosine kinase	102	1	0	0	1	1.759	0.038	2.498	TRUE	3
23191	CYFIP1	cytoplasmic FMR1 interacting protein 1	158	1	0	0	1	1.88	0.047	2.497	TRUE	3
3785	KCNQ2	potassium voltage-gated channel subfamily Q member 2	26	1	0	0	1	1.296	0.012	2.489	TRUE	7
4924	NUCB1	nucleobindin 1	109	0	1	0	1	1.678	0.033	2.486	TRUE	6
94239	H2AFV	H2A histone family member V	303	0	0.5	0	1	1.985	0.056	2.485	TRUE	8
6430	SRSF5	serine and arginine rich splicing factor 5	228	0	1	0	1	1.895	0.049	2.482	TRUE	5
84231	TRAF7	TNF receptor associated factor 7	256	1	0	0	1	1.719	0.036	2.482	TRUE	12
54509	RHOF	ras homolog family member F, filopodia associated	139	0.5	0	0.5	2	1.826	0.044	2.477	TRUE	3
6636	SNRPF	small nuclear ribonucleoprotein polypeptide F	289	0.5	0.5	0	2	1.971	0.056	2.467	TRUE	5
5718	PSMD12	proteasome 26S subunit, non-ATPase 12	211	1	0	0	1	1.869	0.048	2.465	TRUE	1
10075	HUWE1	HECT, UBA and WWE domain containing 1, E3 ubiquitin protein ligase	264	1	0	0	1	1.773	0.041	2.46	TRUE	12
4591	TRIM37	tripartite motif containing 37	258	0	1	0	1	1.853	0.047	2.46	TRUE	12
9969	MED13	mediator complex subunit 13	67	1	0	0	1	1.499	0.023	2.455	TRUE	8
6626	SNRPA	small nuclear ribonucleoprotein polypeptide A	180	0	1	0	1	1.756	0.04	2.454	TRUE	5
5923	RASGRF1	Ras protein specific guanine nucleotide releasing factor 1	35	0	1	0	1	1.462	0.021	2.453	TRUE	3
5707	PSMD1	proteasome 26S subunit, non-ATPase 1	309	0	0.5	0.5	2	1.964	0.057	2.443	TRUE	1
2902	GRIN1	glutamate ionotropic receptor NMDA type subunit 1	52	1	0	0	1	1.633	0.032	2.442	TRUE	3
54883	CWC25	CWC25 spliceosome associated protein homolog	194	0	1	0	1	1.869	0.05	2.432	TRUE	5
5715	PSMD9	proteasome 26S subunit, non-ATPase 9	197	0	1	0	1	1.892	0.052	2.429	TRUE	1
29929	ALG6	ALG6 alpha-1,3-glucosyltransferase	3	1	0.5	0	2	1.048	0.005	2.411	TRUE	15
3211	HOXB1	homeobox B1	66	0	0.5	0.5	2	1.503	0.025	2.408	TRUE	8
6857	SYT1	synaptotagmin 1	151	1	0	0	1	1.847	0.05	2.403	TRUE	10
3786	KCNQ3	potassium voltage-gated channel subfamily Q member 3	26	1	0	0	1	1.296	0.014	2.402	TRUE	7
80184	CEP290	centrosomal protein 290	181	1	0	0	1	1.796	0.046	2.401	TRUE	7
9961	MVP	major vault protein	1	0.5	0.5	0.5	3	1.043	0.005	2.401	TRUE	5
55869	HDAC8	histone deacetylase 8	74	1	0	0	1	1.56	0.029	2.399	TRUE	8
3017	HIST1H2BD	histone cluster 1 H2B family member d	391	0	0.5	0	1	2.132	0.076	2.386	TRUE	8
4915	NTRK2	neurotrophic receptor tyrosine kinase 2	55	1	0	0	1	1.504	0.026	2.384	TRUE	3
2811	GP1BA	glycoprotein Ib platelet subunit alpha	70	0	0.5	0.5	2	1.575	0.031	2.376	TRUE	8
2113	ETS1	ETS proto-oncogene 1, transcription factor	33	0.5	0.5	0	2	1.359	0.018	2.37	TRUE	8
9690	UBE3C	ubiquitin protein ligase E3C	260	1	0	0	1	1.734	0.043	2.37	TRUE	12
1387	CREBBP	CREB binding protein	420	0	0	1	1	2.31	0.095	2.361	TRUE	8
3784	KCNQ1	potassium voltage-gated channel subfamily Q member 1	29	0	1	0	1	1.423	0.022	2.358	TRUE	7
3949	LDLR	low density lipoprotein receptor	129	0.5	0.5	0	2	1.712	0.042	2.357	TRUE	10
3480	IGF1R	insulin like growth factor 1 receptor	68	0	0.5	0.5	2	1.576	0.032	2.356	TRUE	3
23135	KDM6B	lysine demethylase 6B	49	1	0	0.5	2	1.454	0.024	2.355	TRUE	8
22897	CEP164	centrosomal protein 164	132	0.5	0.5	0	2	1.71	0.042	2.354	TRUE	7
3912	LAMB1	laminin subunit beta 1	179	1	0	0	1	1.84	0.053	2.348	TRUE	6
8831	SYNGAP1	synaptic Ras GTPase activating protein 1	15	1	0.5	0	2	1.12	0.008	2.348	TRUE	1
3065	HDAC1	histone deacetylase 1	297	0.5	0	0	1	2.23	0.089	2.343	TRUE	8
4052	LTBP1	latent transforming growth factor beta binding protein 1	112	0.5	0.5	0	2	1.619	0.036	2.338	TRUE	6
10664	CTCF	CCCTC-binding factor	67	1	0	0	1	1.57	0.033	2.325	TRUE	8
80204	FBXO11	F-box protein 11	297	1	0	0	1	1.76	0.048	2.321	TRUE	12
1654	DDX3X	DEAD-box helicase 3 X-linked	10	1	0	1	2	1.008	0.005	2.32	TRUE	5
6599	SMARCC1	SWI/SNF related, matrix associated, actin dependent regulator of chromatin subfamily c member 1	68	0.5	0	0.5	2	1.58	0.034	2.32	TRUE	8
112399	EGLN3	egl-9 family hypoxia inducible factor 3	70	0	1	0	1	1.479	0.027	2.319	TRUE	1
22839	DLGAP4	DLG associated protein 4	22	0	0.5	0.5	2	1.269	0.015	2.315	TRUE	11
23229	ARHGEF9	Cdc42 guanine nucleotide exchange factor 9	27	1	0	0	1	1.379	0.021	2.313	TRUE	4
2274	FHL2	four and a half LIM domains 2	29	0.5	0.5	0	2	1.36	0.02	2.311	TRUE	8
57498	KIDINS220	kinase D interacting substrate 220	16	0	0.5	1	2	1.101	0.008	2.308	TRUE	3
3720	JARID2	jumonji and AT-rich interaction domain containing 2	34	1	0	0.5	2	1.373	0.021	2.304	TRUE	8
51132	RLIM	ring finger protein, LIM domain interacting	256	1	0	0	1	1.719	0.046	2.299	TRUE	12
5071	PRKN	parkin RBR E3 ubiquitin protein ligase	270	1	0	0	1	1.766	0.05	2.298	TRUE	12
9820	CUL7	cullin 7	284	1	0	0	1	1.769	0.051	2.286	TRUE	12
2580	GAK	cyclin G associated kinase	169	0.5	0.5	0	2	1.844	0.058	2.28	TRUE	10
288	ANK3	ankyrin 3	108	1	0	0	1	1.738	0.05	2.261	TRUE	7
5834	PYGB	glycogen phosphorylase B	105	0	1	0	1	1.691	0.046	2.261	TRUE	1
9218	VAPA	VAMP associated protein A	58	0.5	0	1	2	1.411	0.025	2.261	TRUE	7
6497	SKI	SKI proto-oncogene	26	0	1	0	1	1.532	0.034	2.25	TRUE	8
10243	GPHN	gephyrin	13	1	1	0	2	1.287	0.018	2.245	TRUE	4
10787	NCKAP1	NCK associated protein 1	57	1	0	0	1	1.472	0.03	2.242	TRUE	3
23054	NCOA6	nuclear receptor coactivator 6	126	0.5	0	0.5	2	1.757	0.053	2.241	TRUE	8
11070	TMEM115	transmembrane protein 115	74	0	1	0	1	1.499	0.032	2.24	TRUE	7
140890	SREK1	splicing regulatory glutamic acid and lysine rich protein 1	8	0	0.5	1	2	0.886	0.003	2.236	FALSE	NA
5469	MED1	mediator complex subunit 1	186	0	0	1	1	1.967	0.073	2.236	FALSE	NA
7297	TYK2	tyrosine kinase 2	91	0	1	0	1	1.684	0.047	2.236	FALSE	NA
10021	HCN4	hyperpolarization activated cyclic nucleotide gated potassium channel 4	4	0.5	0.5	0	2	0.971	0.005	2.234	FALSE	NA
1917	EEF1A2	eukaryotic translation elongation factor 1 alpha 2	79	1	0.5	0	2	1.48	0.031	2.233	FALSE	NA
8853	ASAP2	ArfGAP with SH3 domain, ankyrin repeat and PH domain 2	16	1	0.5	0	2	1.182	0.013	2.23	FALSE	NA
55870	ASH1L	ASH1 like histone lysine methyltransferase	7	1	0	0	1	0.878	0.003	2.216	FALSE	NA
2778	GNAS	GNAS complex locus	180	0.5	0.5	0.5	3	1.745	0.054	2.212	FALSE	NA
2558	GABRA5	gamma-aminobutyric acid type A receptor alpha5 subunit	17	0.5	0	0	1	1.17	0.013	2.207	FALSE	NA
9662	CEP135	centrosomal protein 135	114	1	0	0	1	1.602	0.042	2.205	FALSE	NA
221037	JMJD1C	jumonji domain containing 1C	1	0.5	0	0.5	2	0.871	0.003	2.197	FALSE	NA
2201	FBN2	fibrillin 2	10	0	1	0	1	0.907	0.004	2.174	FALSE	NA
7690	ZNF131	zinc finger protein 131	5	0	1	1	2	0.861	0.003	2.173	FALSE	NA
7525	YES1	YES proto-oncogene 1, Src family tyrosine kinase	154	0	0	1	1	1.785	0.061	2.168	FALSE	NA
84159	ARID5B	AT-rich interaction domain 5B	3	0	1	0.5	2	0.802	0.002	2.166	FALSE	NA
55160	ARHGEF10L	Rho guanine nucleotide exchange factor 10 like	19	0.5	1	0	2	1.253	0.019	2.157	FALSE	NA
7329	UBE2I	ubiquitin conjugating enzyme E2 I	289	0	0.5	0	1	2.251	0.11	2.157	FALSE	NA
783	CACNB2	calcium voltage-gated channel auxiliary subunit beta 2	62	1	0	0	1	1.467	0.034	2.155	FALSE	NA
2664	GDI1	GDP dissociation inhibitor 1	113	0.5	0	0.5	2	1.706	0.055	2.149	FALSE	NA
22981	NINL	ninein like	114	1	0	0	1	1.602	0.046	2.142	FALSE	NA
8936	WASF1	WASP family member 1	55	1	0	0	1	1.457	0.034	2.139	FALSE	NA
10207	PATJ	PATJ crumbs cell polarity complex component	4	0	1	0.5	2	0.89	0.004	2.134	FALSE	NA
8683	SRSF9	serine and arginine rich splicing factor 9	227	0	0.5	0.5	2	1.68	0.054	2.13	FALSE	NA
5371	PML	promyelocytic leukemia	169	0.5	0	0.5	2	1.8	0.066	2.124	FALSE	NA
27020	NPTN	neuroplastin	13	0	0.5	0.5	2	1.103	0.012	2.118	FALSE	NA
5590	PRKCZ	protein kinase C zeta	119	0.5	0.5	0	2	1.764	0.063	2.118	FALSE	NA
6421	SFPQ	splicing factor proline and glutamine rich	38	0.5	0.5	0.5	3	1.293	0.023	2.118	FALSE	NA
8871	SYNJ2	synaptojanin 2	136	0.5	0	0.5	2	1.689	0.056	2.114	FALSE	NA
5293	PIK3CD	phosphatidylinositol-4,5-bisphosphate 3-kinase catalytic subunit delta	119	0	0	1	1	1.643	0.052	2.11	FALSE	NA
3845	KRAS	KRAS proto-oncogene, GTPase	278	0	0.5	0	1	2.065	0.096	2.102	FALSE	NA
1487	CTBP1	C-terminal binding protein 1	80	0.5	0	0.5	2	1.514	0.041	2.101	FALSE	NA
22866	CNKSR2	connector enhancer of kinase suppressor of Ras 2	57	1	0	0	1	1.374	0.03	2.093	FALSE	NA
2971	GTF3A	general transcription factor IIIA	66	0	0.5	0.5	2	1.494	0.04	2.088	FALSE	NA
53335	BCL11A	BAF chromatin remodeling complex subunit BCL11A	6	1	0.5	0	2	0.903	0.005	2.077	FALSE	NA
3780	KCNN1	potassium calcium-activated channel subfamily N member 1	12	0	1	0	1	1.08	0.012	2.074	FALSE	NA
57580	PREX1	phosphatidylinositol-3,4,5-trisphosphate dependent Rac exchange factor 1	25	1	0	0.5	2	1.265	0.023	2.073	FALSE	NA
9150	CTDP1	CTD phosphatase subunit 1	70	0.5	0.5	0.5	3	1.422	0.035	2.071	FALSE	NA
4627	MYH9	myosin heavy chain 9	68	0.5	0	0.5	2	1.422	0.035	2.07	FALSE	NA
8404	SPARCL1	SPARC like 1	108	1	0	0	1	1.501	0.042	2.066	FALSE	NA
55209	SETD5	SET domain containing 5	1	1	0	0.5	2	0.813	0.003	2.05	FALSE	NA
339122	RAB43	RAB43, member RAS oncogene family	91	1	0	0.5	2	1.509	0.044	2.048	FALSE	NA
4798	NFRKB	nuclear factor related to kappaB binding protein	43	0.5	0.5	0	2	1.303	0.027	2.044	FALSE	NA
5335	PLCG1	phospholipase C gamma 1	265	0	0	1	1	1.987	0.094	2.04	FALSE	NA
11059	WWP1	WW domain containing E3 ubiquitin protein ligase 1	330	0	0.5	0.5	2	1.782	0.072	2.036	FALSE	NA
55697	VAC14	Vac14, PIKFYVE complex component	5	0.5	1	0.5	3	0.883	0.005	2.031	FALSE	NA
3199	HOXA2	homeobox A2	52	0	1	0	1	1.406	0.036	2.029	FALSE	NA
6335	SCN9A	sodium voltage-gated channel alpha subunit 9	21	1	0	0	1	1.091	0.014	2.023	FALSE	NA
27161	AGO2	argonaute RISC catalytic component 2	154	0	0.5	0.5	2	1.719	0.067	2.018	FALSE	NA
8861	LDB1	LIM domain binding 1	43	0.5	0	0	1	1.383	0.035	2.014	FALSE	NA
6326	SCN2A	sodium voltage-gated channel alpha subunit 2	32	1	0	0	1	1.307	0.029	2.01	FALSE	NA
7323	UBE2D3	ubiquitin conjugating enzyme E2 D3	374	0	0.5	0.5	2	1.853	0.084	1.994	FALSE	NA
6709	SPTAN1	spectrin alpha, non-erythrocytic 1	219	0.5	0	0.5	2	1.869	0.086	1.991	FALSE	NA
6323	SCN1A	sodium voltage-gated channel alpha subunit 1	19	1	0	0	1	1.073	0.014	1.989	FALSE	NA
6396	SEC13	SEC13 homolog, nuclear pore and COPII coat complex component	222	0.5	0	0.5	2	1.819	0.081	1.986	FALSE	NA
64764	CREB3L2	cAMP responsive element binding protein 3 like 2	16	0	1	0	1	1.122	0.017	1.986	FALSE	NA
56987	BBX	BBX high mobility group box domain containing	2	0	0	1	1	1.164	0.02	1.978	FALSE	NA
3560	IL2RB	interleukin 2 receptor subunit beta	78	0	0	1	1	1.413	0.04	1.975	FALSE	NA
89780	WNT3A	Wnt family member 3A	79	0	0.5	0.5	2	1.546	0.053	1.972	FALSE	NA
5947	RBP1	retinol binding protein 1	36	0	1	0	1	1.331	0.033	1.971	FALSE	NA
79813	EHMT1	euchromatic histone lysine methyltransferase 1	61	1	0.5	0	2	1.409	0.04	1.969	FALSE	NA
5747	PTK2	protein tyrosine kinase 2	247	0	0.5	0	1	1.95	0.098	1.968	FALSE	NA
5595	MAPK3	mitogen-activated protein kinase 3	362	0.5	0	0	1	2.141	0.121	1.964	FALSE	NA
6929	TCF3	transcription factor 3	54	0.5	0	0	1	1.458	0.045	1.963	FALSE	NA
2260	FGFR1	fibroblast growth factor receptor 1	51	0	0.5	0.5	2	1.348	0.035	1.962	FALSE	NA
7316	UBC	ubiquitin C	1168	0.5	0	0	1	2.722	0.191	1.957	FALSE	NA
93611	FBXO44	F-box protein 44	300	0	0.5	0.5	2	1.647	0.065	1.955	FALSE	NA
5499	PPP1CA	protein phosphatase 1 catalytic subunit alpha	128	0	0.5	0	1	1.718	0.073	1.953	FALSE	NA
147841	SPC24	SPC24 component of NDC80 kinetochore complex	109	0.5	0	0.5	2	1.46	0.046	1.952	FALSE	NA
472	ATM	ATM serine/threonine kinase	225	0	0.5	0.5	2	1.874	0.091	1.951	FALSE	NA
6156	RPL30	ribosomal protein L30	259	0	1	0	1	1.722	0.074	1.947	FALSE	NA
57555	NLGN2	neuroligin 2	28	0.5	0	0	1	1.249	0.028	1.94	FALSE	NA
5187	PER1	period circadian regulator 1	27	0.5	0.5	0	2	1.196	0.024	1.938	FALSE	NA
6305	SBF1	SET binding factor 1	6	1	0	0.5	2	0.841	0.005	1.934	FALSE	NA
23524	SRRM2	serine/arginine repetitive matrix 2	191	0	0.5	0.5	2	1.601	0.062	1.933	FALSE	NA
10531	PITRM1	pitrilysin metallopeptidase 1	19	0.5	1	0	2	1.106	0.018	1.93	FALSE	NA
128239	IQGAP3	IQ motif containing GTPase activating protein 3	21	0.5	0.5	0	2	1.146	0.021	1.923	FALSE	NA
3608	ILF2	interleukin enhancer binding factor 2	130	1	0	0	1	1.644	0.068	1.919	FALSE	NA
151636	DTX3L	deltex E3 ubiquitin ligase 3L	259	0	0.5	0.5	2	1.629	0.067	1.912	FALSE	NA
301	ANXA1	annexin A1	356	1	0	0.5	2	1.785	0.085	1.911	FALSE	NA
55690	PACS1	phosphofurin acidic cluster sorting protein 1	3	1	0	0.5	2	0.858	0.006	1.907	FALSE	NA
1012	CDH13	cadherin 13	20	1	0.5	0	2	1.135	0.021	1.905	FALSE	NA
57669	EPB41L5	erythrocyte membrane protein band 4.1 like 5	13	0	0.5	0	1	1.027	0.014	1.904	FALSE	NA
123169	LEO1	LEO1 homolog, Paf1/RNA polymerase II complex component	96	1	0	0	1	1.471	0.051	1.901	FALSE	NA
56949	XAB2	XPA binding protein 2	250	0.5	0	0.5	2	1.68	0.074	1.899	FALSE	NA
54815	GATAD2A	GATA zinc finger domain containing 2A	127	0	0.5	0.5	2	1.581	0.063	1.898	FALSE	NA
3716	JAK1	Janus kinase 1	205	0	0	1	1	1.921	0.103	1.897	FALSE	NA
51322	WAC	WW domain containing adaptor with coiled-coil	26	1	0	0.5	2	1.257	0.031	1.896	FALSE	NA
3201	HOXA4	homeobox A4	40	0	1	0	1	1.313	0.036	1.895	FALSE	NA
6386	SDCBP	syndecan binding protein	109	0	1	0	1	1.557	0.061	1.891	FALSE	NA
968	CD68	CD68 molecule	54	0	1	0	1	1.263	0.032	1.888	FALSE	NA
8905	AP1S2	adaptor related protein complex 1 subunit sigma 2	88	1	0	0	1	1.497	0.055	1.886	FALSE	NA
10051	SMC4	structural maintenance of chromosomes 4	102	0	1	0	1	1.465	0.052	1.882	FALSE	NA
114088	TRIM9	tripartite motif containing 9	256	0	0.5	0.5	2	1.592	0.066	1.879	FALSE	NA
1454	CSNK1E	casein kinase 1 epsilon	244	0.5	0	0.5	2	1.719	0.081	1.876	FALSE	NA
6196	RPS6KA2	ribosomal protein S6 kinase A2	34	0	0.5	0.5	2	1.208	0.028	1.876	FALSE	NA
100	ADA	adenosine deaminase	35	1	0.5	0	2	1.18	0.026	1.871	FALSE	NA
4628	MYH10	myosin heavy chain 10	46	1	0	0	1	1.358	0.042	1.869	FALSE	NA
4205	MEF2A	myocyte enhancer factor 2A	46	0	0	1	1	1.333	0.04	1.864	FALSE	NA
7328	UBE2H	ubiquitin conjugating enzyme E2 H	265	0.5	0	0.5	2	1.588	0.067	1.864	FALSE	NA
9862	MED24	mediator complex subunit 24	65	0	0.5	0.5	2	1.371	0.044	1.86	FALSE	NA
10189	ALYREF	Aly/REF export factor	252	0.5	0	0.5	2	1.691	0.08	1.855	FALSE	NA
2317	FLNB	filamin B	18	0	1	0	1	1.078	0.019	1.855	FALSE	NA
3952	LEP	leptin	70	0.5	0	0.5	2	1.356	0.043	1.852	FALSE	NA
6334	SCN8A	sodium voltage-gated channel alpha subunit 8	28	1	0	0	1	1.191	0.028	1.849	FALSE	NA
7846	TUBA1A	tubulin alpha 1a	172	0.5	0	0.5	2	1.676	0.079	1.847	FALSE	NA
5862	RAB2A	RAB2A, member RAS oncogene family	75	1	0	0.5	2	1.404	0.049	1.839	FALSE	NA
11100	HNRNPUL1	heterogeneous nuclear ribonucleoprotein U like 1	182	0	0.5	0.5	2	1.591	0.07	1.837	FALSE	NA
1749	DLX5	distal-less homeobox 5	9	0	1	0	1	0.85	0.007	1.832	FALSE	NA
65109	UPF3B	UPF3B regulator of nonsense mediated mRNA decay	309	1	0	0	1	1.76	0.091	1.832	FALSE	NA
595	CCND1	cyclin D1	202	0	0.5	0	1	1.702	0.084	1.831	FALSE	NA
10575	CCT4	chaperonin containing TCP1 subunit 4	187	1	0	0	1	1.638	0.077	1.824	FALSE	NA
51107	APH1A	aph-1 homolog A, gamma-secretase subunit	35	1	0	0	1	1.209	0.031	1.824	FALSE	NA
6168	RPL37A	ribosomal protein L37a	243	0	1	0	1	1.684	0.083	1.821	FALSE	NA
2771	GNAI2	G protein subunit alpha i2	335	0	0.5	0.5	2	1.737	0.09	1.817	FALSE	NA
3570	IL6R	interleukin 6 receptor	40	0	0.5	0.5	2	1.234	0.034	1.812	FALSE	NA
10603	SH2B2	SH2B adaptor protein 2	21	0	0.5	0.5	2	1.079	0.021	1.811	FALSE	NA
5527	PPP2R5C	protein phosphatase 2 regulatory subunit B'gamma	237	0	0	1	1	1.731	0.09	1.81	FALSE	NA
9844	ELMO1	engulfment and cell motility 1	60	0	0	1	1	1.335	0.044	1.81	FALSE	NA
9901	SRGAP3	SLIT-ROBO Rho GTPase activating protein 3	26	0.5	0.5	0	2	1.141	0.026	1.809	FALSE	NA
607	BCL9	BCL9 transcription coactivator	69	0.5	0	0.5	2	1.3	0.041	1.803	FALSE	NA
10589	DRAP1	DR1 associated protein 1	9	0	1	0	1	0.881	0.009	1.802	FALSE	NA
3908	LAMA2	laminin subunit alpha 2	47	0	1	0	1	1.289	0.04	1.802	FALSE	NA
26091	HERC4	HECT and RLD domain containing E3 ubiquitin protein ligase 4	257	0.5	0	0.5	2	1.533	0.067	1.8	FALSE	NA
5532	PPP3CB	protein phosphatase 3 catalytic subunit beta	75	0.5	0	0.5	2	1.432	0.056	1.793	FALSE	NA
6878	TAF6	TATA-box binding protein associated factor 6	139	1	0	0	1	1.527	0.067	1.793	FALSE	NA
59269	HIVEP3	human immunodeficiency virus type I enhancer binding protein 3	61	1	0	0	1	1.285	0.041	1.782	FALSE	NA
6733	SRPK2	SRSF protein kinase 2	4	0.5	1	0.5	3	0.705	0.003	1.778	FALSE	NA
29969	MDFIC	MyoD family inhibitor domain containing	3	0.5	1	0	2	0.741	0.004	1.777	FALSE	NA
3728	JUP	junction plakoglobin	160	0.5	0	0.5	2	1.738	0.095	1.776	FALSE	NA
57674	RNF213	ring finger protein 213	257	0.5	0	0.5	2	1.538	0.07	1.776	FALSE	NA
22905	EPN2	epsin 2	122	0	0.5	0.5	2	1.418	0.056	1.775	FALSE	NA
605	BCL7A	BAF chromatin remodeling complex subunit BCL7A	19	0	0.5	0	1	0.937	0.013	1.768	FALSE	NA
7273	TTN	titin	44	1	0.5	0.5	3	1.32	0.046	1.766	FALSE	NA
10296	MAEA	macrophage erythroblast attacher	5	0	1	0.5	2	0.95	0.014	1.761	FALSE	NA
348980	HCN1	hyperpolarization activated cyclic nucleotide gated potassium channel 1	2	1	0	0	1	0.911	0.012	1.75	FALSE	NA
6602	SMARCD1	SWI/SNF related, matrix associated, actin dependent regulator of chromatin, subfamily d, member 1	72	0	0.5	0	1	1.389	0.055	1.749	FALSE	NA
4758	NEU1	neuraminidase 1	69	0	1	0	1	1.307	0.046	1.748	FALSE	NA
23394	ADNP	activity dependent neuroprotector homeobox	5	1	0	1	2	0.811	0.007	1.747	FALSE	NA
91603	ZNF830	zinc finger protein 830	72	0	0.5	1	2	1.413	0.058	1.747	FALSE	NA
51665	ASB1	ankyrin repeat and SOCS box containing 1	296	0.5	0	0.5	2	1.566	0.077	1.743	FALSE	NA
83638	C11orf68	chromosome 11 open reading frame 68	2	0	1	0	1	0.578	0.001	1.735	FALSE	NA
3791	KDR	kinase insert domain receptor	102	0.5	0	0	1	1.533	0.074	1.734	FALSE	NA
60625	DHX35	DEAH-box helicase 35	32	0.5	0.5	0	2	1.104	0.027	1.732	FALSE	NA
57711	ZNF529	zinc finger protein 529	1	0	1	0.5	2	1.465	0.066	1.729	FALSE	NA
6176	RPLP1	ribosomal protein lateral stalk subunit P1	212	0	1	0	1	1.586	0.082	1.723	FALSE	NA
387	RHOA	ras homolog family member A	431	0	0	0.5	1	2.253	0.173	1.717	FALSE	NA
5649	RELN	reelin	25	1	0	0	1	1.127	0.03	1.716	FALSE	NA
154664	ABCA13	ATP binding cassette subfamily A member 13	54	0	1	0	1	1.263	0.044	1.714	FALSE	NA
5921	RASA1	RAS p21 protein activator 1	109	0	0	1	1	1.459	0.067	1.713	FALSE	NA
7748	ZNF195	zinc finger protein 195	1	0	1	0.5	2	1.465	0.068	1.71	FALSE	NA
5438	POLR2I	RNA polymerase II subunit I	460	0	0.5	0	1	1.907	0.127	1.709	FALSE	NA
6774	STAT3	signal transducer and activator of transcription 3	244	0	0.5	0	1	1.882	0.124	1.706	FALSE	NA
158	ADSL	adenylosuccinate lyase	66	1	0	0	1	1.437	0.066	1.696	FALSE	NA
258010	SVIP	small VCP interacting protein	73	0	1	0	1	1.291	0.049	1.691	FALSE	NA
9454	HOMER3	homer scaffold protein 3	21	0	0.5	0	1	1.053	0.025	1.688	FALSE	NA
55799	CACNA2D3	calcium voltage-gated channel auxiliary subunit alpha2delta 3	19	1	0	0	1	0.967	0.018	1.687	FALSE	NA
5881	RAC3	Rac family small GTPase 3	213	0.5	0	0	1	1.832	0.12	1.687	FALSE	NA
7014	TERF2	telomeric repeat binding factor 2	66	1	0	0	1	1.321	0.053	1.686	FALSE	NA
7155	TOP2B	DNA topoisomerase II beta	20	0	0	1	1	1.004	0.021	1.685	FALSE	NA
864	RUNX3	runt related transcription factor 3	96	0	0	1	1	1.41	0.064	1.684	FALSE	NA
23469	PHF3	PHD finger protein 3	2	1	0	0	1	0.781	0.007	1.683	FALSE	NA
9228	DLGAP2	DLG associated protein 2	21	0.5	0	0	1	1.068	0.027	1.675	FALSE	NA
3297	HSF1	heat shock transcription factor 1	43	0	0.5	0	1	1.231	0.044	1.67	FALSE	NA
2309	FOXO3	forkhead box O3	63	0	0.5	0	1	1.362	0.06	1.664	FALSE	NA
23283	CSTF2T	cleavage stimulation factor subunit 2 tau variant	192	0.5	0	0.5	2	1.515	0.08	1.662	FALSE	NA
6872	TAF1	TATA-box binding protein associated factor 1	88	1	0	0	1	1.36	0.06	1.662	FALSE	NA
7410	VAV2	vav guanine nucleotide exchange factor 2	119	0.5	0	0	1	1.515	0.08	1.661	FALSE	NA
5937	RBMS1	RNA binding motif single stranded interacting protein 1	22	0	1	0.5	2	1.036	0.025	1.659	FALSE	NA
2623	GATA1	GATA binding protein 1	89	0.5	0	0	1	1.425	0.069	1.655	FALSE	NA
84991	RBM17	RNA binding motif protein 17	176	0.5	0	0.5	2	1.489	0.078	1.65	FALSE	NA
10053	AP1M2	adaptor related protein complex 1 subunit mu 2	75	0	0.5	0.5	2	1.301	0.054	1.649	FALSE	NA
9031	BAZ1B	bromodomain adjacent to zinc finger domain 1B	64	0.5	0	0.5	2	1.275	0.051	1.648	FALSE	NA
6249	CLIP1	CAP-Gly domain containing linker protein 1	122	0	0	1	1	1.434	0.071	1.647	FALSE	NA
865	CBFB	core-binding factor subunit beta	203	0	0	0.5	1	1.799	0.122	1.644	FALSE	NA
5529	PPP2R5E	protein phosphatase 2 regulatory subunit B'epsilon	206	0	0	1	1	1.621	0.097	1.642	FALSE	NA
7508	XPC	XPC complex subunit, DNA damage recognition and repair factor	98	1	0	0	1	1.373	0.064	1.639	FALSE	NA
8648	NCOA1	nuclear receptor coactivator 1	169	0	0	1	1	1.658	0.103	1.637	FALSE	NA
51319	RSRC1	arginine and serine rich coiled-coil 1	118	0	1	0	1	1.377	0.065	1.635	FALSE	NA
7532	YWHAG	tyrosine 3-monooxygenase/tryptophan 5-monooxygenase activation protein gamma	191	0	0	1	1	1.628	0.1	1.628	FALSE	NA
64223	MLST8	MTOR associated protein, LST8 homolog	66	0.5	0	0	1	1.345	0.062	1.624	FALSE	NA
9907	AP5Z1	adaptor related protein complex 5 subunit zeta 1	21	0	1	0	1	0.991	0.023	1.623	FALSE	NA
2625	GATA3	GATA binding protein 3	82	0	0.5	0	1	1.348	0.063	1.618	FALSE	NA
4641	MYO1C	myosin IC	64	0	0.5	0.5	2	1.362	0.065	1.616	FALSE	NA
25852	ARMC8	armadillo repeat containing 8	87	0	0.5	0.5	2	1.345	0.063	1.615	FALSE	NA
3013	HIST1H2AD	histone cluster 1 H2A family member d	381	0	0	0.5	1	1.827	0.131	1.613	FALSE	NA
596	BCL2	BCL2 apoptosis regulator	89	0	0.5	0.5	2	1.463	0.079	1.613	FALSE	NA
79890	RIN3	Ras and Rab interactor 3	9	0	1	0	1	0.823	0.011	1.613	FALSE	NA
2037	EPB41L2	erythrocyte membrane protein band 4.1 like 2	14	0	0.5	0	1	0.959	0.021	1.61	FALSE	NA
2104	ESRRG	estrogen related receptor gamma	6	0.5	0.5	0	2	0.786	0.009	1.607	FALSE	NA
7454	WAS	WASP actin nucleation promoting factor	49	0.5	0	0.5	2	1.167	0.043	1.595	FALSE	NA
4659	PPP1R12A	protein phosphatase 1 regulatory subunit 12A	62	0.5	0	0.5	2	1.288	0.058	1.593	FALSE	NA
9692	KIAA0391	KIAA0391	26	0	1	0	1	1.001	0.026	1.586	FALSE	NA
57522	SRGAP1	SLIT-ROBO Rho GTPase activating protein 1	26	0	1	0	1	1.104	0.037	1.58	FALSE	NA
321	APBA2	amyloid beta precursor protein binding family A member 2	7	0.5	0	0.5	2	0.822	0.012	1.578	FALSE	NA
10097	ACTR2	actin related protein 2	252	0	0	1	1	1.713	0.12	1.577	FALSE	NA
10336	PCGF3	polycomb group ring finger 3	32	0	1	0.5	2	1.026	0.029	1.577	FALSE	NA
9693	RAPGEF2	Rap guanine nucleotide exchange factor 2	13	0.5	0	0.5	2	0.901	0.018	1.572	FALSE	NA
80380	PDCD1LG2	programmed cell death 1 ligand 2	19	0	1	0	1	0.97	0.024	1.571	FALSE	NA
3718	JAK3	Janus kinase 3	110	0	0.5	0	1	1.503	0.091	1.564	FALSE	NA
25957	PNISR	PNN interacting serine and arginine rich protein	17	0	0	0.5	1	0.965	0.024	1.563	FALSE	NA
117143	TADA1	transcriptional adaptor 1	30	0	0.5	0.5	2	1.053	0.033	1.56	FALSE	NA
7050	TGIF1	TGFB induced factor homeobox 1	15	0	0.5	0.5	2	0.927	0.021	1.555	FALSE	NA
7225	TRPC6	transient receptor potential cation channel subfamily C member 6	17	1	0	0	1	0.954	0.024	1.545	FALSE	NA
8165	AKAP1	A-kinase anchoring protein 1	11	0	1	0	1	0.873	0.017	1.545	FALSE	NA
6093	ROCK1	Rho associated coiled-coil containing protein kinase 1	69	0	0	1	1	1.33	0.069	1.544	FALSE	NA
51003	MED31	mediator complex subunit 31	79	0.5	0	0.5	2	1.336	0.07	1.543	FALSE	NA
8986	RPS6KA4	ribosomal protein S6 kinase A4	26	0	0.5	0.5	2	1.086	0.038	1.542	FALSE	NA
89941	RHOT2	ras homolog family member T2	141	0.5	0	0	1	1.5	0.094	1.541	FALSE	NA
801	CALM1	calmodulin 1	91	0	0	0.5	1	1.537	0.1	1.537	FALSE	NA
23526	ARHGAP45	Rho GTPase activating protein 45	104	0.5	0	0.5	2	1.365	0.076	1.528	FALSE	NA
8312	AXIN1	axin 1	120	0.5	0	0.5	2	1.414	0.083	1.528	FALSE	NA
5829	PXN	paxillin	172	0.5	0	0	1	1.625	0.116	1.521	FALSE	NA
9275	BCL7B	BAF chromatin remodeling complex subunit BCL7B	14	0.5	0	0	1	0.834	0.015	1.521	FALSE	NA
58517	RBM25	RNA binding motif protein 25	75	0.5	0	0.5	2	1.251	0.061	1.52	FALSE	NA
221	ALDH3B1	aldehyde dehydrogenase 3 family member B1	108	0	1	0	1	1.356	0.076	1.517	FALSE	NA
6804	STX1A	syntaxin 1A	78	0.5	0	0	1	1.351	0.076	1.512	FALSE	NA
57679	ALS2	alsin Rho guanine nucleotide exchange factor ALS2	8	0	1	0	1	0.786	0.012	1.51	FALSE	NA
2885	GRB2	growth factor receptor bound protein 2	214	0.5	0	0	1	1.723	0.133	1.509	FALSE	NA
5600	MAPK11	mitogen-activated protein kinase 11	181	0.5	0	0	1	1.695	0.13	1.501	FALSE	NA
396	ARHGDIA	Rho GDP dissociation inhibitor alpha	36	0.5	0	0.5	2	1.165	0.052	1.495	FALSE	NA
9630	GNA14	G protein subunit alpha 14	188	0	1	0	1	1.395	0.085	1.493	FALSE	NA
5925	RB1	RB transcriptional corepressor 1	159	0	0.5	0	1	1.511	0.103	1.492	FALSE	NA
27044	SND1	staphylococcal nuclease and tudor domain containing 1	64	0.5	0	0.5	2	1.224	0.061	1.487	FALSE	NA
3150	HMGN1	high mobility group nucleosome binding domain 1	70	1	0	0	1	1.229	0.062	1.485	FALSE	NA
23593	HEBP2	heme binding protein 2	87	0	0.5	0.5	2	1.294	0.072	1.479	FALSE	NA
5087	PBX1	PBX homeobox 1	89	0	0.5	0	1	1.366	0.083	1.476	FALSE	NA
55534	MAML3	mastermind like transcriptional coactivator 3	69	0	0	1	1	1.234	0.064	1.474	FALSE	NA
5587	PRKD1	protein kinase D1	19	1	0	0	1	0.986	0.032	1.474	FALSE	NA
481	ATP1B1	ATPase Na+/K+ transporting subunit beta 1	27	0.5	0	0.5	2	1.126	0.05	1.465	FALSE	NA
9958	USP15	ubiquitin specific peptidase 15	19	1	0	0.5	2	1.023	0.037	1.465	FALSE	NA
94103	ORMDL3	ORMDL sphingolipid biosynthesis regulator 3	95	0	1	0	1	1.308	0.076	1.464	FALSE	NA
5594	MAPK1	mitogen-activated protein kinase 1	446	0	0	0.5	1	2.071	0.197	1.461	FALSE	NA
5592	PRKG1	protein kinase cGMP-dependent 1	52	0.5	0	0	1	1.268	0.071	1.456	FALSE	NA
1386	ATF2	activating transcription factor 2	158	0	0.5	0	1	1.522	0.112	1.447	FALSE	NA
151246	SGO2	shugoshin 2	109	0	0	1	1	1.265	0.072	1.445	FALSE	NA
5034	P4HB	prolyl 4-hydroxylase subunit beta	179	0.5	0	0.5	2	1.519	0.112	1.444	FALSE	NA
51422	PRKAG2	protein kinase AMP-activated non-catalytic subunit gamma 2	66	0	0.5	0	1	1.283	0.075	1.443	FALSE	NA
102	ADAM10	ADAM metallopeptidase domain 10	256	0	0	1	1	1.646	0.133	1.442	FALSE	NA
134266	GRPEL2	GrpE like 2, mitochondrial	31	0	1	0.5	2	1.071	0.045	1.442	FALSE	NA
5095	PCCA	propionyl-CoA carboxylase subunit alpha	25	1	0	0.5	2	1.07	0.045	1.442	FALSE	NA
10847	SRCAP	Snf2 related CREBBP activator protein	17	1	0	0	1	0.909	0.026	1.44	FALSE	NA
896	CCND3	cyclin D3	74	0	0.5	0	1	1.185	0.061	1.44	FALSE	NA
2561	GABRB2	gamma-aminobutyric acid type A receptor beta2 subunit	15	0	0.5	0	1	0.944	0.03	1.438	FALSE	NA
8395	PIP5K1B	phosphatidylinositol-4-phosphate 5-kinase type 1 beta	58	0	0.5	0	1	1.203	0.064	1.436	FALSE	NA
5908	RAP1B	RAP1B, member of RAS oncogene family	206	0	0	0.5	1	1.644	0.134	1.435	FALSE	NA
900	CCNG1	cyclin G1	10	1	0	0.5	2	0.876	0.023	1.434	FALSE	NA
1601	DAB2	DAB adaptor protein 2	125	0.5	0	0.5	2	1.357	0.088	1.432	FALSE	NA
23385	NCSTN	nicastrin	91	0	0.5	0	1	1.298	0.079	1.431	FALSE	NA
3689	ITGB2	integrin subunit beta 2	208	0	0	1	1	1.63	0.133	1.428	FALSE	NA
253430	IPMK	inositol polyphosphate multikinase	34	0	0.5	0	1	1.074	0.047	1.427	FALSE	NA
79092	CARD14	caspase recruitment domain family member 14	4	0	1	0.5	2	0.595	0.004	1.427	FALSE	NA
4040	LRP6	LDL receptor related protein 6	68	0	0	1	1	1.281	0.077	1.426	FALSE	NA
51385	ZNF589	zinc finger protein 589	1	0.5	0.5	0.5	3	1.408	0.098	1.421	FALSE	NA
83700	JAM3	junctional adhesion molecule 3	10	0	1	0.5	2	0.866	0.023	1.419	FALSE	NA
86	ACTL6A	actin like 6A	115	0	0.5	0	1	1.399	0.097	1.417	FALSE	NA
23200	ATP11B	ATPase phospholipid transporting 11B (putative)	54	0	0.5	0.5	2	1.138	0.057	1.416	FALSE	NA
9244	CRLF1	cytokine receptor like factor 1	8	0	1	0	1	0.799	0.017	1.414	FALSE	NA
2992	GYG1	glycogenin 1	22	0	1	0	1	1.072	0.048	1.413	FALSE	NA
4851	NOTCH1	notch receptor 1	127	0.5	0	0	1	1.545	0.122	1.412	FALSE	NA
5036	PA2G4	proliferation-associated 2G4	161	0.5	0	0.5	2	1.419	0.101	1.412	FALSE	NA
80232	WDR26	WD repeat domain 26	10	1	0	0	1	0.862	0.023	1.412	FALSE	NA
85378	TUBGCP6	tubulin gamma complex associated protein 6	84	0.5	0	0.5	2	1.248	0.074	1.411	FALSE	NA
119	ADD2	adducin 2	9	0	1	0	1	0.83	0.02	1.41	FALSE	NA
5591	PRKDC	protein kinase, DNA-activated, catalytic subunit	86	0	0.5	0.5	2	1.323	0.086	1.41	FALSE	NA
8140	SLC7A5	solute carrier family 7 member 5	2	1	1	0	2	0.784	0.016	1.409	FALSE	NA
5698	PSMB9	proteasome subunit beta 9	201	0	0	1	1	1.451	0.107	1.408	FALSE	NA
9402	GRAP2	GRB2 related adaptor protein 2	68	0	0	1	1	1.199	0.067	1.407	FALSE	NA
9846	GAB2	GRB2 associated binding protein 2	92	0	0.5	0	1	1.382	0.096	1.406	FALSE	NA
1808	DPYSL2	dihydropyrimidinase like 2	26	1	0	0	1	1.02	0.042	1.405	FALSE	NA
9863	MAGI2	membrane associated guanylate kinase, WW and PDZ domain containing 2	7	0	1	0	1	0.745	0.013	1.405	FALSE	NA
1105	CHD1	chromodomain helicase DNA binding protein 1	39	1	0	0	1	1.079	0.05	1.404	FALSE	NA
10728	PTGES3	prostaglandin E synthase 3	113	0.5	0	0	1	1.358	0.093	1.4	FALSE	NA
79003	MIS12	MIS12 kinetochore complex component	116	0	0	1	1	1.276	0.08	1.399	FALSE	NA
9727	RAB11FIP3	RAB11 family interacting protein 3	24	0	1	0	1	0.935	0.032	1.398	FALSE	NA
25909	AHCTF1	AT-hook containing transcription factor 1	104	0	0	1	1	1.257	0.078	1.393	FALSE	NA
1793	DOCK1	dedicator of cytokinesis 1	59	0	0.5	0	1	1.197	0.069	1.39	FALSE	NA
79658	ARHGAP10	Rho GTPase activating protein 10	28	0.5	0	0.5	2	1.088	0.053	1.388	FALSE	NA
480	ATP1A4	ATPase Na+/K+ transporting subunit alpha 4	24	0	1	0	1	1.064	0.05	1.385	FALSE	NA
5519	PPP2R1B	protein phosphatase 2 scaffold subunit Abeta	258	0.5	0	0	1	1.638	0.143	1.384	FALSE	NA
7414	VCL	vinculin	191	0	0.5	0	1	1.592	0.135	1.384	FALSE	NA
2648	KAT2A	lysine acetyltransferase 2A	177	0	0.5	0	1	1.506	0.121	1.381	FALSE	NA
8366	HIST1H4B	histone cluster 1 H4 family member b	92	0	1	0	1	1.307	0.088	1.38	FALSE	NA
23263	MCF2L	MCF.2 cell line derived transforming sequence like	21	0	1	0	1	0.979	0.039	1.379	FALSE	NA
7874	USP7	ubiquitin specific peptidase 7	85	1	0	0	1	1.307	0.088	1.379	FALSE	NA
54014	BRWD1	bromodomain and WD repeat domain containing 1	7	0.5	0	0.5	2	0.755	0.015	1.377	FALSE	NA
4173	MCM4	minichromosome maintenance complex component 4	132	0	0.5	0.5	2	1.379	0.101	1.373	FALSE	NA
2869	GRK5	G protein-coupled receptor kinase 5	157	0.5	0.5	0	2	1.294	0.088	1.366	FALSE	NA
6919	TCEA2	transcription elongation factor A2	20	0	1	0.5	2	0.914	0.032	1.366	FALSE	NA
2064	ERBB2	erb-b2 receptor tyrosine kinase 2	91	0	0.5	0	1	1.317	0.092	1.365	FALSE	NA
4149	MAX	MYC associated factor X	93	0	0.5	0	1	1.284	0.087	1.361	FALSE	NA
9318	COPS2	COP9 signalosome subunit 2	227	0	0	1	1	1.387	0.105	1.358	FALSE	NA
160364	CLEC12A	C-type lectin domain family 12 member A	114	0	0.5	0.5	2	1.309	0.092	1.356	FALSE	NA
5983	RFC3	replication factor C subunit 3	189	0	0.5	0.5	2	1.484	0.122	1.356	FALSE	NA
1760	DMPK	DM1 protein kinase	1	1	0.5	0	2	0.61	0.006	1.355	FALSE	NA
109	ADCY3	adenylate cyclase 3	335	1	0	0	1	1.505	0.126	1.354	FALSE	NA
7915	ALDH5A1	aldehyde dehydrogenase 5 family member A1	17	1	0	0.5	2	0.863	0.027	1.354	FALSE	NA
26959	HBP1	HMG-box transcription factor 1	8	0	0.5	0	1	0.774	0.018	1.35	FALSE	NA
3183	HNRNPC	heterogeneous nuclear ribonucleoprotein C (C1/C2)	241	0	0	1	1	1.471	0.121	1.35	FALSE	NA
23268	DNMBP	dynamin binding protein	1	0	1	0.5	2	0.751	0.016	1.349	FALSE	NA
478	ATP1A3	ATPase Na+/K+ transporting subunit alpha 3	26	1	0	0	1	1.077	0.056	1.349	FALSE	NA
8514	KCNAB2	potassium voltage-gated channel subfamily A regulatory beta subunit 2	153	0	0.5	0	1	1.596	0.143	1.348	FALSE	NA
5770	PTPN1	protein tyrosine phosphatase non-receptor type 1	78	0	0	1	1	1.257	0.085	1.346	FALSE	NA
23236	PLCB1	phospholipase C beta 1	191	1	0	0	1	1.391	0.108	1.345	FALSE	NA
9840	TESPA1	thymocyte expressed, positive selection associated 1	14	0	1	0	1	0.77	0.018	1.344	FALSE	NA
9584	RBM39	RNA binding motif protein 39	15	0	0	1	1	0.889	0.031	1.341	FALSE	NA
7472	WNT2	Wnt family member 2	33	0	1	0	1	0.972	0.042	1.338	FALSE	NA
27332	ZNF638	zinc finger protein 638	7	0.5	0	0.5	2	0.786	0.02	1.336	FALSE	NA
84919	PPP1R15B	protein phosphatase 1 regulatory subunit 15B	32	0.5	0	1	2	0.991	0.045	1.335	FALSE	NA
476	ATP1A1	ATPase Na+/K+ transporting subunit alpha 1	32	1	0	0	1	1.124	0.065	1.334	FALSE	NA
8945	BTRC	beta-transducin repeat containing E3 ubiquitin protein ligase	423	0.5	0	0	1	1.572	0.143	1.328	FALSE	NA
2036	EPB41L1	erythrocyte membrane protein band 4.1 like 1	34	0.5	0	0	1	1.111	0.064	1.326	FALSE	NA
83439	TCF7L1	transcription factor 7 like 1	67	0.5	0	0	1	1.184	0.076	1.325	FALSE	NA
10630	PDPN	podoplanin	7	0	1	0	1	0.726	0.015	1.323	FALSE	NA
57187	THOC2	THO complex 2	96	0	0	1	1	1.187	0.077	1.322	FALSE	NA
9568	GABBR2	gamma-aminobutyric acid type B receptor subunit 2	253	1	0	0	1	1.373	0.109	1.322	FALSE	NA
6710	SPTB	spectrin beta, erythrocytic	109	0	0.5	0	1	1.303	0.097	1.32	FALSE	NA
8664	EIF3D	eukaryotic translation initiation factor 3 subunit D	128	0	0.5	0.5	2	1.236	0.086	1.317	FALSE	NA
114799	ESCO1	establishment of sister chromatid cohesion N-acetyltransferase 1	9	0	0.5	0.5	2	0.685	0.012	1.316	FALSE	NA
506	ATP5F1B	ATP synthase F1 subunit beta	132	0.5	0.5	0	2	1.507	0.134	1.315	FALSE	NA
5430	POLR2A	RNA polymerase II subunit A	499	0	0	0.5	1	1.812	0.188	1.315	FALSE	NA
10929	SRSF8	serine and arginine rich splicing factor 8	7	0	0	1	1	0.656	0.01	1.312	FALSE	NA
6874	TAF4	TATA-box binding protein associated factor 4	97	0.5	0	0.5	2	1.243	0.088	1.312	FALSE	NA
1850	DUSP8	dual specificity phosphatase 8	12	0	1	0	1	0.844	0.028	1.311	FALSE	NA
5079	PAX5	paired box 5	10	1	0	0	1	0.781	0.021	1.311	FALSE	NA
9681	DEPDC5	DEP domain containing 5	15	1	0	0	1	0.907	0.036	1.309	FALSE	NA
4204	MECP2	methyl-CpG binding protein 2	8	1	0	0	1	0.78	0.021	1.308	FALSE	NA
7471	WNT1	Wnt family member 1	73	0	0.5	0	1	1.227	0.086	1.308	FALSE	NA
9546	APBA3	amyloid beta precursor protein binding family A member 3	8	0	0.5	0	1	0.717	0.015	1.308	FALSE	NA
1476	CSTB	cystatin B	55	0	1	0	1	1.138	0.071	1.307	FALSE	NA
1756	DMD	dystrophin	84	1	0	0	1	1.329	0.104	1.306	FALSE	NA
8826	IQGAP1	IQ motif containing GTPase activating protein 1	107	0.5	0	0	1	1.361	0.11	1.305	FALSE	NA
10276	NET1	neuroepithelial cell transforming 1	19	0	1	0	1	0.924	0.039	1.302	FALSE	NA
7704	ZBTB16	zinc finger and BTB domain containing 16	296	0	0	1	1	1.38	0.114	1.302	FALSE	NA
4855	NOTCH4	notch receptor 4	110	0	0.5	0	1	1.321	0.104	1.298	FALSE	NA
79791	FBXO31	F-box protein 31	300	0	0	1	1	1.39	0.117	1.295	FALSE	NA
23097	CDK19	cyclin dependent kinase 19	61	0	0	1	1	1.118	0.07	1.291	FALSE	NA
89910	UBE3B	ubiquitin protein ligase E3B	256	0	0	1	1	1.336	0.108	1.291	FALSE	NA
140735	DYNLL2	dynein light chain LC8-type 2	292	0	0.5	0	1	1.593	0.155	1.29	FALSE	NA
2047	EPHB1	EPH receptor B1	75	0	0.5	0	1	1.203	0.085	1.287	FALSE	NA
6775	STAT4	signal transducer and activator of transcription 4	75	0	0	1	1	1.291	0.101	1.285	FALSE	NA
8607	RUVBL1	RuvB like AAA ATPase 1	213	0.5	0	0	1	1.478	0.135	1.285	FALSE	NA
84441	MAML2	mastermind like transcriptional coactivator 2	70	0	0.5	0	1	1.157	0.079	1.276	FALSE	NA
4193	MDM2	MDM2 proto-oncogene	134	0.5	0	0	1	1.519	0.145	1.274	FALSE	NA
5094	PCBP2	poly(rC) binding protein 2	187	0	0	1	1	1.34	0.112	1.274	FALSE	NA
23248	RPRD2	regulation of nuclear pre-mRNA domain containing 2	73	0	0.5	0.5	2	1.095	0.069	1.272	FALSE	NA
2788	GNG7	G protein subunit gamma 7	504	0	0.5	0.5	2	1.596	0.16	1.27	FALSE	NA
6300	MAPK12	mitogen-activated protein kinase 12	91	0.5	0	0	1	1.302	0.106	1.269	FALSE	NA
7479	WNT8B	Wnt family member 8B	62	0	0.5	0	1	1.156	0.08	1.268	FALSE	NA
9117	SEC22C	SEC22 homolog C, vesicle trafficking protein	62	0	0.5	0.5	2	1.08	0.067	1.267	FALSE	NA
140628	GATA5	GATA binding protein 5	7	0	1	0	1	0.704	0.016	1.264	FALSE	NA
29102	DROSHA	drosha ribonuclease III	35	0	0.5	0.5	2	0.984	0.052	1.264	FALSE	NA
7476	WNT7A	Wnt family member 7A	33	0	1	0	1	0.972	0.05	1.264	FALSE	NA
5663	PSEN1	presenilin 1	99	0.5	0	0	1	1.257	0.099	1.263	FALSE	NA
90627	STARD13	StAR related lipid transfer domain containing 13	22	0	1	0	1	0.938	0.045	1.263	FALSE	NA
7073	TIAL1	TIA1 cytotoxic granule associated RNA binding protein like 1	37	0	0	1	1	1.086	0.069	1.261	FALSE	NA
112939	NACC1	nucleus accumbens associated 1	1	1	0	0	1	0.769	0.023	1.26	FALSE	NA
1432	MAPK14	mitogen-activated protein kinase 14	264	0	0	0.5	1	1.714	0.185	1.256	FALSE	NA
3662	IRF4	interferon regulatory factor 4	120	0	0	1	1	1.338	0.115	1.256	FALSE	NA
5930	RBBP6	RB binding protein 6, ubiquitin ligase	265	0	0	1	1	1.348	0.117	1.256	FALSE	NA
6046	BRD2	bromodomain containing 2	12	0	0.5	0	1	0.852	0.034	1.251	FALSE	NA
57178	ZMIZ1	zinc finger MIZ-type containing 1	2	0	1	0.5	2	0.611	0.009	1.25	FALSE	NA
55166	CENPQ	centromere protein Q	138	0	0.5	0	1	1.259	0.102	1.249	FALSE	NA
5565	PRKAB2	protein kinase AMP-activated non-catalytic subunit beta 2	69	0.5	0	0	1	1.242	0.099	1.247	FALSE	NA
80230	RUFY1	RUN and FYVE domain containing 1	5	0	1	0	1	0.683	0.015	1.246	FALSE	NA
9578	CDC42BPB	CDC42 binding protein kinase beta	1	1	0	0	1	0.769	0.024	1.246	FALSE	NA
5411	PNN	pinin, desmosome associated protein	19	0	0	1	1	0.897	0.041	1.245	FALSE	NA
552	AVPR1A	arginine vasopressin receptor 1A	160	1	0	0	1	1.266	0.104	1.244	FALSE	NA
9734	HDAC9	histone deacetylase 9	68	0	0.5	0	1	1.152	0.084	1.24	FALSE	NA
3559	IL2RA	interleukin 2 receptor subunit alpha	78	0.5	0	0	1	1.207	0.094	1.239	FALSE	NA
4088	SMAD3	SMAD family member 3	177	0	0	0.5	1	1.541	0.157	1.239	FALSE	NA
51105	PHF20L1	PHD finger protein 20 like 1	13	0	0	1	1	0.755	0.023	1.237	FALSE	NA
8658	TNKS	tankyrase	62	0.5	0	0.5	2	1.071	0.07	1.237	FALSE	NA
9698	PUM1	pumilio RNA binding family member 1	47	0	0.5	0.5	2	1.024	0.062	1.237	FALSE	NA
57153	SLC44A2	solute carrier family 44 member 2	88	0	0.5	0.5	2	1.159	0.086	1.235	FALSE	NA
259	AMBP	alpha-1-microglobulin/bikunin precursor	22	0	1	0	1	0.889	0.041	1.233	FALSE	NA
9024	BRSK2	BR serine/threonine kinase 2	6	0.5	0.5	0.5	3	0.641	0.012	1.232	FALSE	NA
51719	CAB39	calcium binding protein 39	23	0	0.5	0.5	2	0.913	0.045	1.229	FALSE	NA
164	AP1G1	adaptor related protein complex 1 subunit gamma 1	96	0	0	1	1	1.217	0.098	1.228	FALSE	NA
5441	POLR2L	RNA polymerase II subunit L	519	0	0	0.5	1	1.773	0.203	1.228	FALSE	NA
5721	PSME2	proteasome activator subunit 2	201	0	0.5	0	1	1.381	0.129	1.228	FALSE	NA
7025	NR2F1	nuclear receptor subfamily 2 group F member 1	11	1	0	0	1	0.703	0.018	1.227	FALSE	NA
134492	NUDCD2	NudC domain containing 2	1	1	0	0.5	2	0.613	0.01	1.226	FALSE	NA
4784	NFIX	nuclear factor I X	18	1	0	1	2	0.805	0.03	1.226	FALSE	NA
1120	CHKB	choline kinase beta	9	1	0	0	1	0.876	0.04	1.225	FALSE	NA
23608	MKRN1	makorin ring finger protein 1	260	0	0.5	0	1	1.267	0.108	1.225	FALSE	NA
3745	KCNB1	potassium voltage-gated channel subfamily B member 1	12	1	0	0	1	0.811	0.031	1.224	FALSE	NA
10507	SEMA4D	semaphorin 4D	16	0	0	1	1	0.817	0.032	1.222	FALSE	NA
220988	HNRNPA3	heterogeneous nuclear ribonucleoprotein A3	184	0	0	1	1	1.321	0.119	1.221	FALSE	NA
4010	LMX1B	LIM homeobox transcription factor 1 beta	11	1	0	0	1	0.807	0.031	1.218	FALSE	NA
64207	IRF2BPL	interferon regulatory factor 2 binding protein like	3	1	0	0.5	2	0.646	0.013	1.218	FALSE	NA
64105	CENPK	centromere protein K	138	0	0.5	0	1	1.259	0.108	1.217	FALSE	NA
7082	TJP1	tight junction protein 1	23	0.5	0	0	1	0.91	0.046	1.217	FALSE	NA
56924	PAK6	p21 (RAC1) activated kinase 6	10	0	1	0	1	0.765	0.026	1.212	FALSE	NA
163702	IFNLR1	interferon lambda receptor 1	12	0	0.5	0.5	2	0.788	0.029	1.211	FALSE	NA
5702	PSMC3	proteasome 26S subunit, ATPase 3	206	0	0.5	0	1	1.383	0.133	1.211	FALSE	NA
57589	RIC1	RIC1 homolog, RAB6A GEF complex partner 1	45	0.5	0	0.5	2	0.997	0.061	1.211	FALSE	NA
84911	ZNF382	zinc finger protein 382	1	0	1	0	1	1.163	0.091	1.211	FALSE	NA
23368	PPP1R13B	protein phosphatase 1 regulatory subunit 13B	11	0	0.5	0.5	2	0.795	0.03	1.21	FALSE	NA
55846	ITFG2	integrin alpha FG-GAP repeat containing 2	5	0	1	0	1	0.702	0.019	1.209	FALSE	NA
11133	KPTN	kaptin, actin binding protein	4	1	0	0	1	0.663	0.015	1.208	FALSE	NA
146760	RTN4RL1	reticulon 4 receptor like 1	66	0.5	0.5	0	2	1.107	0.081	1.208	FALSE	NA
1780	DYNC1I1	dynein cytoplasmic 1 intermediate chain 1	252	0	0.5	0	1	1.466	0.15	1.208	FALSE	NA
51088	KLHL5	kelch like family member 5	295	0	0	1	1	1.373	0.132	1.208	FALSE	NA
8864	PER2	period circadian regulator 2	26	1	0	0	1	0.998	0.062	1.206	FALSE	NA
6635	SNRPE	small nuclear ribonucleoprotein polypeptide E	298	0	0	1	1	1.497	0.157	1.204	FALSE	NA
25898	RCHY1	ring finger and CHY zinc finger domain containing 1	270	0	0.5	0	1	1.291	0.117	1.203	FALSE	NA
1398	CRK	CRK proto-oncogene, adaptor protein	140	0	0	0.5	1	1.382	0.135	1.202	FALSE	NA
84282	RNF135	ring finger protein 135	35	1	0	0.5	2	0.976	0.059	1.199	FALSE	NA
2318	FLNC	filamin C	23	0.5	0	0	1	0.921	0.05	1.198	FALSE	NA
27124	INPP5J	inositol polyphosphate-5-phosphatase J	14	0	0.5	0	1	0.756	0.026	1.198	FALSE	NA
6048	RNF5	ring finger protein 5	15	0	1	0	1	0.896	0.046	1.198	FALSE	NA
116985	ARAP1	ArfGAP with RhoGAP domain, ankyrin repeat and PH domain 1	30	0	0.5	0.5	2	0.947	0.055	1.193	FALSE	NA
7280	TUBB2A	tubulin beta 2A class IIa	53	0.5	0	1	2	1.119	0.086	1.193	FALSE	NA
4916	NTRK3	neurotrophic receptor tyrosine kinase 3	40	0	0.5	0	1	1.048	0.074	1.185	FALSE	NA
5434	POLR2E	RNA polymerase II subunit E	519	0	0	0.5	1	1.759	0.212	1.185	FALSE	NA
6772	STAT1	signal transducer and activator of transcription 1	174	0	0	0.5	1	1.508	0.164	1.184	FALSE	NA
151613	TTC14	tetratricopeptide repeat domain 14	2	0	1	0.5	2	0.564	0.008	1.183	FALSE	NA
4988	OPRM1	opioid receptor mu 1	243	0	1	0	1	1.325	0.128	1.183	FALSE	NA
54739	XAF1	XIAP associated factor 1	48	0	1	0.5	2	1.023	0.07	1.182	FALSE	NA
5929	RBBP5	RB binding protein 5, histone lysine methyltransferase complex subunit	204	0	0	0.5	1	1.398	0.143	1.181	FALSE	NA
64121	RRAGC	Ras related GTP binding C	44	0	0	0.5	1	1.048	0.075	1.179	FALSE	NA
23258	DENND5A	DENN domain containing 5A	6	0	1	0	1	0.625	0.013	1.178	FALSE	NA
2908	NR3C1	nuclear receptor subfamily 3 group C member 1	128	0	0	0.5	1	1.304	0.125	1.178	FALSE	NA
2917	GRM7	glutamate metabotropic receptor 7	231	0.5	0.5	0	2	1.268	0.118	1.177	FALSE	NA
22800	RRAS2	RAS related 2	34	0	0.5	0	1	0.957	0.059	1.176	FALSE	NA
51701	NLK	nemo like kinase	31	0	0	0.5	1	0.915	0.052	1.175	FALSE	NA
5021	OXTR	oxytocin receptor	162	1	0	0	1	1.204	0.106	1.174	FALSE	NA
51773	RSF1	remodeling and spacing factor 1	60	0	0	1	1	1.073	0.081	1.171	FALSE	NA
3196	TLX2	T cell leukemia homeobox 2	1	0	0.5	0	1	0.898	0.05	1.168	FALSE	NA
5436	POLR2G	RNA polymerase II subunit G	463	0	0	0.5	1	1.669	0.2	1.167	FALSE	NA
11311	VPS45	vacuolar protein sorting 45 homolog	18	0.5	0.5	0	2	0.828	0.039	1.166	FALSE	NA
8440	NCK2	NCK adaptor protein 2	87	0.5	0	0	1	1.21	0.109	1.165	FALSE	NA
8621	CDK13	cyclin dependent kinase 13	20	1	0	0	1	0.871	0.046	1.165	FALSE	NA
5431	POLR2B	RNA polymerase II subunit B	466	0	0	0.5	1	1.656	0.199	1.161	FALSE	NA
85313	PPIL4	peptidylprolyl isomerase like 4	177	0	0	1	1	1.3	0.128	1.161	FALSE	NA
6777	STAT5B	signal transducer and activator of transcription 5B	108	0	0	0.5	1	1.299	0.128	1.16	FALSE	NA
83988	NCALD	neurocalcin delta	53	0	0	1	1	1.073	0.083	1.16	FALSE	NA
1408	CRY2	cryptochrome circadian regulator 2	24	0	0.5	0.5	2	0.968	0.064	1.156	FALSE	NA
51586	MED15	mediator complex subunit 15	64	0.5	0	0	1	1.043	0.078	1.156	FALSE	NA
5518	PPP2R1A	protein phosphatase 2 scaffold subunit Aalpha	512	0	0	0.5	1	1.778	0.224	1.155	FALSE	NA
54518	APBB1IP	amyloid beta precursor protein binding family B member 1 interacting protein	70	0	0.5	0	1	1.124	0.094	1.154	FALSE	NA
79759	ZNF668	zinc finger protein 668	1	0	1	0	1	1.163	0.102	1.153	FALSE	NA
5350	PLN	phospholamban	31	0	0	0.5	1	1.055	0.081	1.152	FALSE	NA
81930	KIF18A	kinesin family member 18A	217	0	0.5	0	1	1.368	0.144	1.151	FALSE	NA
5869	RAB5B	RAB5B, member RAS oncogene family	193	0.5	0	0	1	1.436	0.158	1.15	FALSE	NA
2239	GPC4	glypican 4	58	1	0	0	1	1.109	0.092	1.149	FALSE	NA
51561	IL23A	interleukin 23 subunit alpha	18	0.5	0	0.5	2	0.847	0.044	1.149	FALSE	NA
63916	ELMO2	engulfment and cell motility 2	40	0	0.5	0	1	1.01	0.073	1.148	FALSE	NA
3490	IGFBP7	insulin like growth factor binding protein 7	110	0	0	1	1	1.182	0.107	1.147	FALSE	NA
143686	SESN3	sestrin 3	11	0	1	0	1	0.759	0.031	1.146	FALSE	NA
5571	PRKAG1	protein kinase AMP-activated non-catalytic subunit gamma 1	80	0	0	0.5	1	1.225	0.116	1.146	FALSE	NA
4209	MEF2D	myocyte enhancer factor 2D	53	0	0	0.5	1	1.054	0.082	1.145	FALSE	NA
9894	TELO2	telomere maintenance 2	13	0	0.5	0	1	0.727	0.027	1.14	FALSE	NA
2332	FMR1	fragile X mental retardation 1	19	1	0	0	1	0.795	0.037	1.139	FALSE	NA
84894	LINGO1	leucine rich repeat and Ig domain containing 1	8	0	1	0	1	0.709	0.025	1.136	FALSE	NA
23433	RHOQ	ras homolog family member Q	164	0	0	0.5	1	1.435	0.162	1.134	FALSE	NA
3069	HDLBP	high density lipoprotein binding protein	12	0.5	1	0	2	0.786	0.036	1.134	FALSE	NA
338	APOB	apolipoprotein B	300	0.5	0	0	1	1.592	0.194	1.134	FALSE	NA
2066	ERBB4	erb-b2 receptor tyrosine kinase 4	53	0.5	0	0	1	1.031	0.08	1.131	FALSE	NA
23019	CNOT1	CCR4-NOT transcription complex subunit 1	44	0.5	0	0.5	2	1.101	0.094	1.131	FALSE	NA
3021	H3F3B	H3 histone family member 3B	86	0	0.5	0	1	1.183	0.111	1.13	FALSE	NA
10055	SAE1	SUMO1 activating enzyme subunit 1	20	1	0	0	1	0.813	0.041	1.128	FALSE	NA
1080	CFTR	cystic fibrosis transmembrane conductance regulator	207	0.5	0	0	1	1.427	0.162	1.128	FALSE	NA
5599	MAPK8	mitogen-activated protein kinase 8	198	0	0	0.5	1	1.524	0.182	1.128	FALSE	NA
6566	SLC16A1	solute carrier family 16 member 1	1	0.5	1	0	2	0.646	0.018	1.128	FALSE	NA
23295	MGRN1	mahogunin ring finger 1	258	0	0.5	0	1	1.266	0.129	1.126	FALSE	NA
90411	MCFD2	multiple coagulation factor deficiency 2	63	0	0.5	0.5	2	1.08	0.091	1.125	FALSE	NA
7223	TRPC4	transient receptor potential cation channel subfamily C member 4	7	0	1	0	1	0.67	0.021	1.124	FALSE	NA
7535	ZAP70	zeta chain of T cell receptor associated protein kinase 70	73	0	0.5	0	1	1.129	0.101	1.124	FALSE	NA
55660	PRPF40A	pre-mRNA processing factor 40 homolog A	172	0	0	1	1	1.257	0.128	1.122	FALSE	NA
8065	CUL5	cullin 5	304	0.5	0	0	1	1.262	0.129	1.122	FALSE	NA
150094	SIK1	salt inducible kinase 1	15	1	0	0	1	0.788	0.038	1.119	FALSE	NA
55658	RNF126	ring finger protein 126	258	0.5	0	0	1	1.256	0.129	1.117	FALSE	NA
974	CD79B	CD79b molecule	45	0	0	0.5	1	1.011	0.079	1.115	FALSE	NA
10152	ABI2	abl interactor 2	56	0	0.5	0	1	1.092	0.096	1.112	FALSE	NA
23048	FNBP1	formin binding protein 1	117	0	0	1	1	1.165	0.111	1.112	FALSE	NA
1462	VCAN	versican	154	0	0.5	0	1	1.35	0.151	1.109	FALSE	NA
55835	CENPJ	centromere protein J	133	0	0.5	0	1	1.237	0.127	1.109	FALSE	NA
6134	RPL10	ribosomal protein L10	214	0.5	0	0.5	2	1.322	0.145	1.109	FALSE	NA
23327	NEDD4L	neural precursor cell expressed, developmentally down-regulated 4-like, E3 ubiquitin protein ligase	302	0	0.5	0	1	1.369	0.155	1.108	FALSE	NA
122769	LRR1	leucine rich repeat protein 1	295	0	0.5	0	1	1.287	0.138	1.107	FALSE	NA
4782	NFIC	nuclear factor I C	32	0	0.5	0.5	2	0.948	0.068	1.107	FALSE	NA
4983	OPHN1	oligophrenin 1	19	1	0	0	1	0.845	0.049	1.107	FALSE	NA
9735	KNTC1	kinetochore associated 1	124	0	0.5	0	1	1.202	0.12	1.107	FALSE	NA
1019	CDK4	cyclin dependent kinase 4	140	0.5	0	0	1	1.295	0.14	1.106	FALSE	NA
9040	UBE2M	ubiquitin conjugating enzyme E2 M	334	0	0.5	0	1	1.361	0.154	1.106	FALSE	NA
43	ACHE	acetylcholinesterase (Cartwright blood group)	4	1	0	0	1	0.667	0.022	1.105	FALSE	NA
64682	ANAPC1	anaphase promoting complex subunit 1	353	0	0.5	0	1	1.408	0.164	1.105	FALSE	NA
1314	COPA	coatomer protein complex subunit alpha	180	0	0.5	0	1	1.345	0.152	1.101	FALSE	NA
1739	DLG1	discs large MAGUK scaffold protein 1	53	0.5	0	0	1	1.11	0.102	1.1	FALSE	NA
3164	NR4A1	nuclear receptor subfamily 4 group A member 1	17	0	0.5	0	1	0.817	0.045	1.1	FALSE	NA
8786	RGS11	regulator of G protein signaling 11	19	0	1	0	1	0.798	0.042	1.099	FALSE	NA
867	CBL	Cbl proto-oncogene	273	0	0	0.5	1	1.528	0.191	1.098	FALSE	NA
9099	USP2	ubiquitin specific peptidase 2	25	0	1	0	1	0.877	0.056	1.098	FALSE	NA
2051	EPHB6	EPH receptor B6	52	0	0.5	0	1	1.025	0.085	1.097	FALSE	NA
2335	FN1	fibronectin 1	275	0.5	0	0	1	1.55	0.196	1.097	FALSE	NA
6936	GCFC2	GC-rich sequence DNA-binding factor 2	155	0	0.5	0	1	1.179	0.118	1.094	FALSE	NA
9212	AURKB	aurora kinase B	299	0	0.5	0	1	1.502	0.187	1.094	FALSE	NA
3705	ITPK1	inositol-tetrakisphosphate 1-kinase	25	0	0.5	0	1	0.893	0.06	1.091	FALSE	NA
5316	PKNOX1	PBX/knotted 1 homeobox 1	65	0.5	0	0	1	1.091	0.1	1.091	FALSE	NA
223082	ZNRF2	zinc and ring finger 2	256	0	0.5	0	1	1.249	0.134	1.09	FALSE	NA
54487	DGCR8	DGCR8 microprocessor complex subunit	28	0.5	0	0.5	2	0.855	0.053	1.09	FALSE	NA
148022	TICAM1	toll like receptor adaptor molecule 1	37	0	0.5	0.5	2	1.011	0.084	1.088	FALSE	NA
1289	COL5A1	collagen type V alpha 1 chain	72	0	1	0	1	1.097	0.102	1.087	FALSE	NA
79902	NUP85	nucleoporin 85	231	0.5	0	0	1	1.393	0.166	1.087	FALSE	NA
80012	PHC3	polyhomeotic homolog 3	126	0	0	1	1	1.231	0.131	1.087	FALSE	NA
1874	E2F4	E2F transcription factor 4	56	0	0.5	0	1	0.998	0.082	1.084	FALSE	NA
4000	LMNA	lamin A/C	64	0	0.5	0	1	1.074	0.098	1.083	FALSE	NA
5295	PIK3R1	phosphoinositide-3-kinase regulatory subunit 1	492	0	0	0.5	1	1.83	0.256	1.083	FALSE	NA
5511	PPP1R8	protein phosphatase 1 regulatory subunit 8	15	0	0.5	0.5	2	0.807	0.046	1.079	FALSE	NA
5710	PSMD4	proteasome 26S subunit, non-ATPase 4	216	0	0.5	0	1	1.393	0.168	1.079	FALSE	NA
22999	RIMS1	regulating synaptic membrane exocytosis 1	29	1	0	0	1	0.898	0.063	1.078	FALSE	NA
375790	AGRN	agrin	107	0	0.5	0	1	1.281	0.144	1.078	FALSE	NA
9477	MED20	mediator complex subunit 20	60	0	0.5	0	1	1.035	0.091	1.077	FALSE	NA
100128327	TRAPPC3L	trafficking protein particle complex 3 like	12	0	1	0	1	0.664	0.024	1.075	FALSE	NA
3915	LAMC1	laminin subunit gamma 1	159	0	0.5	0	1	1.3	0.149	1.075	FALSE	NA
55607	PPP1R9A	protein phosphatase 1 regulatory subunit 9A	1	0	1	0	1	0.57	0.013	1.075	FALSE	NA
23396	PIP5K1C	phosphatidylinositol-4-phosphate 5-kinase type 1 gamma	71	0	0	0.5	1	1.106	0.107	1.074	FALSE	NA
353274	ZNF445	zinc finger protein 445	2	0	0.5	1	2	0.928	0.07	1.072	FALSE	NA
7161	TP73	tumor protein p73	93	0.5	0	0	1	1.187	0.125	1.072	FALSE	NA
83933	HDAC10	histone deacetylase 10	73	0.5	0	0	1	1.072	0.1	1.072	FALSE	NA
92591	ASB16	ankyrin repeat and SOCS box containing 16	296	0	0.5	0	1	1.287	0.148	1.068	FALSE	NA
2214	FCGR3A	Fc fragment of IgG receptor IIIa	75	0	0	0.5	1	1.112	0.11	1.066	FALSE	NA
47	ACLY	ATP citrate lyase	118	0	0.5	0	1	1.262	0.143	1.066	FALSE	NA
8480	RAE1	ribonucleic acid export 1	146	0	0.5	0	1	1.229	0.136	1.065	FALSE	NA
9455	HOMER2	homer scaffold protein 2	22	0	0	0.5	1	0.882	0.062	1.065	FALSE	NA
11320	MGAT4A	alpha-1,3-mannosyl-glycoprotein 4-beta-N-acetylglucosaminyltransferase A	115	0	0	1	1	1.2	0.13	1.064	FALSE	NA
3633	INPP5B	inositol polyphosphate-5-phosphatase B	43	0.5	0	0	1	1.003	0.087	1.064	FALSE	NA
92369	SPSB4	splA/ryanodine receptor domain and SOCS box containing 4	296	0	0.5	0	1	1.287	0.149	1.064	FALSE	NA
163	AP2B1	adaptor related protein complex 2 subunit beta 1	175	0	0.5	0	1	1.363	0.166	1.063	FALSE	NA
25937	WWTR1	WW domain containing transcription regulator 1	53	0	0.5	0	1	1.035	0.094	1.063	FALSE	NA
55521	TRIM36	tripartite motif containing 36	256	0	0.5	0	1	1.249	0.141	1.063	FALSE	NA
5701	PSMC2	proteasome 26S subunit, ATPase 2	252	0.5	0	0	1	1.368	0.167	1.063	FALSE	NA
5700	PSMC1	proteasome 26S subunit, ATPase 1	245	0	0.5	0	1	1.435	0.182	1.062	FALSE	NA
8266	UBL4A	ubiquitin like 4A	13	0.5	0	0	1	0.8	0.047	1.062	FALSE	NA
8454	CUL1	cullin 1	439	0	0	0.5	1	1.478	0.191	1.062	FALSE	NA
51143	DYNC1LI1	dynein cytoplasmic 1 light intermediate chain 1	253	0.5	0	0	1	1.414	0.178	1.06	FALSE	NA
10652	YKT6	YKT6 v-SNARE homolog	155	0.5	0	0	1	1.299	0.153	1.059	FALSE	NA
3984	LIMK1	LIM domain kinase 1	29	0.5	0	0	1	0.907	0.068	1.059	FALSE	NA
90678	LRSAM1	leucine rich repeat and sterile alpha motif containing 1	256	0	0.5	0	1	1.249	0.142	1.059	FALSE	NA
2873	GPS1	G protein pathway suppressor 1	218	0	0.5	0	1	1.253	0.143	1.058	FALSE	NA
627	BDNF	brain derived neurotrophic factor	59	0	0.5	0	1	1.09	0.107	1.058	FALSE	NA
2145	EZH1	enhancer of zeste 1 polycomb repressive complex 2 subunit	29	0	1	0	1	0.875	0.062	1.057	FALSE	NA
2898	GRIK2	glutamate ionotropic receptor kainate type subunit 2	8	1	0	0	1	0.622	0.02	1.057	FALSE	NA
6760	SS18	SS18 subunit of BAF chromatin remodeling complex	23	0	0	0.5	1	0.829	0.053	1.057	FALSE	NA
1797	DXO	decapping exoribonuclease	8	0.5	0.5	0	2	0.605	0.018	1.056	FALSE	NA
51720	UIMC1	ubiquitin interaction motif containing 1	61	0.5	0	0.5	2	1.028	0.094	1.056	FALSE	NA
54556	ING3	inhibitor of growth family member 3	57	0	0	1	1	1.024	0.093	1.056	FALSE	NA
998	CDC42	cell division cycle 42	484	0	0	0	0	1.948	0.287	1.056	FALSE	NA
1431	CS	citrate synthase	90	0.5	0	0.5	2	1.246	0.143	1.053	FALSE	NA
1268	CNR1	cannabinoid receptor 1	229	1	0	0	1	1.214	0.136	1.052	FALSE	NA
53981	CPSF2	cleavage and polyadenylation specific factor 2	237	0.5	0	0	1	1.308	0.157	1.052	FALSE	NA
79441	HAUS3	HAUS augmin like complex subunit 3	114	0	0.5	0	1	1.142	0.12	1.052	FALSE	NA
5096	PCCB	propionyl-CoA carboxylase subunit beta	25	1	0	0	1	0.885	0.065	1.051	FALSE	NA
53942	CNTN5	contactin 5	66	1	0	0	1	0.991	0.087	1.051	FALSE	NA
57154	SMURF1	SMAD specific E3 ubiquitin protein ligase 1	313	0.5	0	0	1	1.357	0.168	1.051	FALSE	NA
1438	CSF2RA	colony stimulating factor 2 receptor alpha subunit	51	0.5	0	0	1	1.055	0.101	1.05	FALSE	NA
23762	OSBP2	oxysterol binding protein 2	1	0	0.5	0.5	2	0.535	0.011	1.049	FALSE	NA
7341	SUMO1	small ubiquitin like modifier 1	251	0	0	0.5	1	1.624	0.226	1.049	FALSE	NA
91694	LONRF1	LON peptidase N-terminal domain and ring finger 1	256	0	0.5	0	1	1.249	0.145	1.048	FALSE	NA
10062	NR1H3	nuclear receptor subfamily 1 group H member 3	34	0	0.5	0	1	0.921	0.073	1.047	FALSE	NA
5879	RAC1	Rac family small GTPase 1	502	0	0	0	0	2.065	0.311	1.047	FALSE	NA
10920	COPS8	COP9 signalosome subunit 8	216	0	0.5	0	1	1.256	0.147	1.046	FALSE	NA
29760	BLNK	B cell linker	49	0	0	0.5	1	0.985	0.087	1.045	FALSE	NA
10210	TOPORS	TOP1 binding arginine/serine rich protein	17	0.5	0	0.5	2	0.77	0.044	1.044	FALSE	NA
917	CD3G	CD3g molecule	227	0	0	0.5	1	1.451	0.191	1.043	FALSE	NA
10273	STUB1	STIP1 homology and U-box containing protein 1	281	0.5	0	0	1	1.301	0.158	1.042	FALSE	NA
171177	RHOV	ras homolog family member V	139	0	0	0.5	1	1.313	0.161	1.042	FALSE	NA
54472	TOLLIP	toll interacting protein	157	0	0.5	0	1	1.297	0.158	1.039	FALSE	NA
7067	THRA	thyroid hormone receptor alpha	18	0	0.5	0	1	0.77	0.045	1.037	FALSE	NA
2173	FABP7	fatty acid binding protein 7	18	0	0.5	0	1	0.791	0.049	1.036	FALSE	NA
5500	PPP1CB	protein phosphatase 1 catalytic subunit beta	119	0	0	0.5	1	1.306	0.161	1.036	FALSE	NA
8836	GGH	gamma-glutamyl hydrolase	184	0	0.5	0	1	1.448	0.193	1.035	FALSE	NA
23265	EXOC7	exocyst complex component 7	46	0	0.5	0	1	1.042	0.102	1.033	FALSE	NA
23194	FBXL7	F-box and leucine rich repeat protein 7	346	0.5	0	0	1	1.311	0.163	1.032	FALSE	NA
116986	AGAP2	ArfGAP with GTPase domain, ankyrin repeat and PH domain 2	9	1	0	0	1	0.701	0.034	1.029	FALSE	NA
3800	KIF5C	kinesin family member 5C	12	1	0	0	1	0.682	0.031	1.029	FALSE	NA
7159	TP53BP2	tumor protein p53 binding protein 2	17	0	0	1	1	0.805	0.053	1.027	FALSE	NA
271	AMPD2	adenosine monophosphate deaminase 2	22	0	1	0	1	0.845	0.061	1.026	FALSE	NA
11108	PRDM4	PR/SET domain 4	6	0.5	0.5	0.5	3	0.595	0.019	1.024	FALSE	NA
778	CACNA1F	calcium voltage-gated channel subunit alpha1 F	37	0.5	0	0	1	0.896	0.072	1.024	FALSE	NA
25791	NGEF	neuronal guanine nucleotide exchange factor	41	0	0	1	1	0.964	0.087	1.023	FALSE	NA
5898	RALA	RAS like proto-oncogene A	56	0	0	1	1	1.058	0.108	1.023	FALSE	NA
133522	PPARGC1B	PPARG coactivator 1 beta	40	0.5	0	0	1	0.94	0.082	1.022	FALSE	NA
3304	HSPA1B	heat shock protein family A (Hsp70) member 1B	75	0	0	1	1	1.07	0.111	1.022	FALSE	NA
55288	RHOT1	ras homolog family member T1	152	0	0	0.5	1	1.359	0.177	1.022	FALSE	NA
5291	PIK3CB	phosphatidylinositol-4,5-bisphosphate 3-kinase catalytic subunit beta	188	0	0	0.5	1	1.407	0.188	1.021	FALSE	NA
3985	LIMK2	LIM domain kinase 2	10	0	0.5	0.5	2	0.718	0.038	1.02	FALSE	NA
23025	UNC13A	unc-13 homolog A	5	1	0	0	1	0.629	0.024	1.019	FALSE	NA
1759	DNM1	dynamin 1	190	0.5	0	0	1	1.383	0.184	1.017	FALSE	NA
55083	KIF26B	kinesin family member 26B	76	0	1	0	1	1.013	0.099	1.017	FALSE	NA
10673	TNFSF13B	TNF superfamily member 13b	68	0	0.5	0.5	2	1.012	0.099	1.016	FALSE	NA
6453	ITSN1	intersectin 1	159	0	0.5	0	1	1.295	0.164	1.016	FALSE	NA
1522	CTSZ	cathepsin Z	146	0	0	1	1	1.262	0.157	1.015	FALSE	NA
6598	SMARCB1	SWI/SNF related, matrix associated, actin dependent regulator of chromatin, subfamily b, member 1	65	0	0	0.5	1	1.069	0.113	1.013	FALSE	NA
152330	CNTN4	contactin 4	67	1	0	0	1	1.007	0.099	1.011	FALSE	NA
4905	NSF	N-ethylmaleimide sensitive factor, vesicle fusing ATPase	144	0.5	0	0	1	1.31	0.169	1.011	FALSE	NA
5108	PCM1	pericentriolar material 1	118	0	0.5	0	1	1.157	0.134	1.01	FALSE	NA
22938	SNW1	SNW domain containing 1	272	0	0	0.5	1	1.386	0.187	1.009	FALSE	NA
2901	GRIK5	glutamate ionotropic receptor kainate type subunit 5	8	1	0	0	1	0.622	0.024	1.008	FALSE	NA
51411	BIN2	bridging integrator 2	25	0	0.5	0.5	2	0.8	0.055	1.008	FALSE	NA
5333	PLCD1	phospholipase C delta 1	21	0	0.5	0	1	0.769	0.049	1.008	FALSE	NA
9896	FIG4	FIG4 phosphoinositide 5-phosphatase	3	0	0.5	0	1	0.525	0.012	1.008	FALSE	NA
3563	IL3RA	interleukin 3 receptor subunit alpha	36	0.5	0	0	1	0.936	0.084	1.007	FALSE	NA
7037	TFRC	transferrin receptor	178	0.5	0	0	1	1.323	0.174	1.005	FALSE	NA
80331	DNAJC5	DnaJ heat shock protein family (Hsp40) member C5	139	0.5	0	0	1	1.218	0.15	1.003	FALSE	NA
10657	KHDRBS1	KH RNA binding domain containing, signal transduction associated 1	34	0.5	0	0.5	2	0.861	0.069	1	FALSE	NA
8821	INPP4B	inositol polyphosphate-4-phosphatase type II B	32	0	0	0.5	1	0.917	0.081	1	FALSE	NA
613	BCR	BCR activator of RhoGEF and GTPase	83	0	0	0.5	1	1.123	0.129	0.999	FALSE	NA
71	ACTG1	actin gamma 1	105	0.5	0	0	1	1.241	0.157	0.998	FALSE	NA
55722	CEP72	centrosomal protein 72	114	0	0.5	0	1	1.142	0.134	0.997	FALSE	NA
9467	SH3BP5	SH3 domain binding protein 5	9	0	0.5	0	1	0.608	0.023	0.997	FALSE	NA
3913	LAMB2	laminin subunit beta 2	154	0.5	0	0	1	1.222	0.153	0.996	FALSE	NA
116115	ZNF526	zinc finger protein 526	1	0	0.5	0.5	2	0.683	0.035	0.995	FALSE	NA
1029	CDKN2A	cyclin dependent kinase inhibitor 2A	72	0	0.5	0	1	1.088	0.122	0.994	FALSE	NA
51666	ASB4	ankyrin repeat and SOCS box containing 4	297	0.5	0	0	1	1.224	0.154	0.994	FALSE	NA
610	HCN2	hyperpolarization activated cyclic nucleotide gated potassium and sodium channel 2	4	0.5	0	0	1	0.634	0.027	0.994	FALSE	NA
23203	PMPCA	peptidase, mitochondrial processing alpha subunit	35	0	0.5	0	1	0.906	0.08	0.993	FALSE	NA
7849	PAX8	paired box 8	10	0	0.5	0	1	0.693	0.037	0.993	FALSE	NA
147923	ZNF420	zinc finger protein 420	5	0.5	0	1	2	0.886	0.076	0.992	FALSE	NA
9928	KIF14	kinesin family member 14	54	1	0	0	1	0.917	0.083	0.991	FALSE	NA
2195	FAT1	FAT atypical cadherin 1	12	0.5	0.5	0	2	0.696	0.038	0.989	FALSE	NA
808	CALM3	calmodulin 3	72	0	0	0	0	1.167	0.142	0.989	FALSE	NA
5954	RCN1	reticulocalbin 1	115	0	0.5	0	1	1.118	0.131	0.987	FALSE	NA
8932	MBD2	methyl-CpG binding domain protein 2	54	0	0	1	1	0.978	0.098	0.986	FALSE	NA
3632	INPP5A	inositol polyphosphate-5-phosphatase A	12	0	0.5	0	1	0.659	0.032	0.984	FALSE	NA
50813	COPS7A	COP9 signalosome subunit 7A	217	0	0.5	0	1	1.254	0.164	0.984	FALSE	NA
999	CDH1	cadherin 1	132	0	0	0.5	1	1.352	0.187	0.984	FALSE	NA
6383	SDC2	syndecan 2	222	0.5	0	0	1	1.483	0.218	0.981	FALSE	NA
3233	HOXD4	homeobox D4	66	0	0.5	0	1	1.069	0.121	0.98	FALSE	NA
3619	INCENP	inner centromere protein	151	0.5	0	0	1	1.194	0.151	0.98	FALSE	NA
64856	VWA1	von Willebrand factor A domain containing 1	108	0	0.5	0	1	1.093	0.127	0.98	FALSE	NA
27345	KCNMB4	potassium calcium-activated channel subfamily M regulatory beta subunit 4	11	0	0.5	0	1	0.726	0.045	0.978	FALSE	NA
7430	EZR	ezrin	65	0	0	1	1	1.078	0.124	0.977	FALSE	NA
6448	SGSH	N-sulfoglucosamine sulfohydrolase	2	1	0.5	0	2	0.508	0.012	0.976	FALSE	NA
9341	VAMP3	vesicle associated membrane protein 3	164	0	0.5	0	1	1.272	0.171	0.976	FALSE	NA
23774	BRD1	bromodomain containing 1	25	0	0.5	0	1	0.807	0.062	0.974	FALSE	NA
54107	POLE3	DNA polymerase epsilon 3, accessory subunit	164	0	0.5	0	1	1.281	0.174	0.973	FALSE	NA
5111	PCNA	proliferating cell nuclear antigen	253	0	0.5	0	1	1.456	0.215	0.972	FALSE	NA
10565	ARFGEF1	ADP ribosylation factor guanine nucleotide exchange factor 1	7	0	0.5	0.5	2	0.741	0.049	0.97	FALSE	NA
146713	RBFOX3	RNA binding fox-1 homolog 3	1	0	1	0	1	0.71	0.043	0.97	FALSE	NA
3185	HNRNPF	heterogeneous nuclear ribonucleoprotein F	202	0.5	0	0	1	1.248	0.167	0.97	FALSE	NA
5890	RAD51B	RAD51 paralog B	65	0.5	0.5	0	2	1.012	0.11	0.97	FALSE	NA
205428	DIPK2A	divergent protein kinase domain 2A	35	0.5	0	0.5	2	0.798	0.061	0.969	FALSE	NA
6625	SNRNP70	small nuclear ribonucleoprotein U1 subunit 70	185	0	0.5	0	1	1.199	0.156	0.968	FALSE	NA
1869	E2F1	E2F transcription factor 1	111	0.5	0	0	1	1.282	0.176	0.967	FALSE	NA
25	ABL1	ABL proto-oncogene 1, non-receptor tyrosine kinase	130	0	0	0.5	1	1.261	0.171	0.967	FALSE	NA
54756	IL17RD	interleukin 17 receptor D	33	0	0.5	0	1	0.845	0.072	0.966	FALSE	NA
10743	RAI1	retinoic acid induced 1	5	1	0.5	0	2	0.502	0.012	0.964	FALSE	NA
55754	TMEM30A	transmembrane protein 30A	129	0	0	1	1	1.147	0.145	0.962	FALSE	NA
2053	EPHX2	epoxide hydrolase 2	54	0	1	0	1	1.001	0.11	0.96	FALSE	NA
9112	MTA1	metastasis associated 1	122	0	0.5	0	1	1.214	0.162	0.96	FALSE	NA
27094	KCNMB3	potassium calcium-activated channel subfamily M regulatory beta subunit 3	11	0	0.5	0	1	0.726	0.048	0.958	FALSE	NA
5137	PDE1C	phosphodiesterase 1C	11	0.5	0.5	0	2	0.663	0.036	0.958	FALSE	NA
57571	CARNS1	carnosine synthase 1	26	0	0.5	0.5	2	0.881	0.082	0.957	FALSE	NA
79991	STN1	STN1 subunit of CST complex	28	0	0.5	0.5	2	0.791	0.062	0.956	FALSE	NA
6778	STAT6	signal transducer and activator of transcription 6	115	0.5	0	0	1	1.237	0.169	0.955	FALSE	NA
6907	TBL1X	transducin beta like 1 X-linked	110	0	0	0.5	1	1.19	0.158	0.954	FALSE	NA
79053	ALG8	ALG8 alpha-1,3-glucosyltransferase	3	0	0.5	0	1	0.767	0.057	0.954	FALSE	NA
93323	HAUS8	HAUS augmin like complex subunit 8	114	0	0.5	0	1	1.142	0.146	0.954	FALSE	NA
10814	CPLX2	complexin 2	22	0	1	0	1	0.778	0.06	0.951	FALSE	NA
1488	CTBP2	C-terminal binding protein 2	18	0	0	1	1	0.745	0.053	0.951	FALSE	NA
259266	ASPM	abnormal spindle microtubule assembly	128	1	0	0	1	1.174	0.155	0.951	FALSE	NA
84248	FYTTD1	forty-two-three domain containing 1	84	0	0	1	1	0.988	0.109	0.951	FALSE	NA
546	ATRX	ATRX chromatin remodeler	10	0	0	1	1	0.623	0.03	0.949	FALSE	NA
8317	CDC7	cell division cycle 7	52	0	1	0	1	0.94	0.098	0.949	FALSE	NA
5026	P2RX5	purinergic receptor P2X 5	6	1	0	0.5	2	0.688	0.042	0.948	FALSE	NA
79176	FBXL15	F-box and leucine rich repeat protein 15	300	0.5	0	0	1	1.24	0.172	0.948	FALSE	NA
3488	IGFBP5	insulin like growth factor binding protein 5	113	0	0.5	0	1	1.112	0.141	0.946	FALSE	NA
8898	MTMR2	myotubularin related protein 2	6	0.5	0	0	1	0.615	0.029	0.946	FALSE	NA
157855	KCNU1	potassium calcium-activated channel subfamily U member 1	10	0	0.5	0	1	0.681	0.041	0.945	FALSE	NA
2632	GBE1	1,4-alpha-glucan branching enzyme 1	19	0	0.5	0	1	0.79	0.064	0.943	FALSE	NA
26986	PABPC1	poly(A) binding protein cytoplasmic 1	170	0	0	1	1	1.241	0.174	0.943	FALSE	NA
9379	NRXN2	neurexin 2	45	0	0	0	0	1.028	0.121	0.943	FALSE	NA
51684	SUFU	SUFU negative regulator of hedgehog signaling	101	0	0.5	0	1	1.117	0.144	0.94	FALSE	NA
5582	PRKCG	protein kinase C gamma	98	0	0	0.5	1	1.165	0.156	0.94	FALSE	NA
55680	RUFY2	RUN and FYVE domain containing 2	1	0	0	1	1	0.56	0.021	0.939	FALSE	NA
84861	KLHL22	kelch like family member 22	296	0.5	0	0	1	1.225	0.171	0.939	FALSE	NA
55914	ERBIN	erbb2 interacting protein	19	1	0	0	1	0.838	0.076	0.938	FALSE	NA
6773	STAT2	signal transducer and activator of transcription 2	86	0.5	0	0	1	1.083	0.136	0.938	FALSE	NA
347240	KIF24	kinesin family member 24	97	0.5	0	0	1	1.053	0.129	0.937	FALSE	NA
51690	LSM7	LSM7 homolog, U6 small nuclear RNA and mRNA degradation associated	193	0	0.5	0	1	1.225	0.172	0.937	FALSE	NA
6844	VAMP2	vesicle associated membrane protein 2	245	0	0	0.5	1	1.455	0.227	0.937	FALSE	NA
4790	NFKB1	nuclear factor kappa B subunit 1	288	0	0	0.5	1	1.493	0.236	0.936	FALSE	NA
5330	PLCB2	phospholipase C beta 2	190	0	0.5	0.5	2	1.224	0.172	0.936	FALSE	NA
7094	TLN1	talin 1	142	0	0	0.5	1	1.261	0.181	0.936	FALSE	NA
8874	ARHGEF7	Rho guanine nucleotide exchange factor 7	85	0.5	0	0	1	1.1	0.141	0.936	FALSE	NA
51747	LUC7L3	LUC7 like 3 pre-mRNA splicing factor	15	0	0	1	1	0.674	0.041	0.935	FALSE	NA
79671	NLRX1	NLR family member X1	5	0.5	0.5	0.5	3	0.536	0.018	0.935	FALSE	NA
84261	FBXW9	F-box and WD repeat domain containing 9	305	0.5	0	0	1	1.242	0.177	0.934	FALSE	NA
84812	PLCD4	phospholipase C delta 4	19	0.5	0	0	1	0.713	0.049	0.934	FALSE	NA
93986	FOXP2	forkhead box P2	3	1	1	0	2	0.535	0.018	0.934	FALSE	NA
79624	ARMT1	acidic residue methyltransferase 1	3	0	0.5	0.5	2	0.456	0.009	0.933	FALSE	NA
80314	EPC1	enhancer of polycomb homolog 1	51	0	0	1	1	0.953	0.105	0.933	FALSE	NA
1122	CHML	CHM like Rab escort protein	118	0	0	0.5	1	1.199	0.167	0.932	FALSE	NA
5986	RFNG	RFNG O-fucosylpeptide 3-beta-N-acetylglucosaminyltransferase	6	0.5	0	0.5	2	0.576	0.024	0.932	FALSE	NA
1143	CHRNB4	cholinergic receptor nicotinic beta 4 subunit	127	0.5	0	0	1	1.149	0.155	0.931	FALSE	NA
960	CD44	CD44 molecule (Indian blood group)	95	0	0	1	1	1.114	0.146	0.931	FALSE	NA
8914	TIMELESS	timeless circadian regulator	65	0.5	0	0.5	2	0.982	0.113	0.93	FALSE	NA
22927	HABP4	hyaluronan binding protein 4	31	0	0.5	1	2	0.822	0.074	0.929	FALSE	NA
6814	STXBP3	syntaxin binding protein 3	26	0.5	0	0	1	0.835	0.077	0.929	FALSE	NA
10193	RNF41	ring finger protein 41	261	0.5	0	0	1	1.204	0.17	0.927	FALSE	NA
55777	MBD5	methyl-CpG binding domain protein 5	19	1	0	0	1	0.789	0.067	0.926	FALSE	NA
6122	RPL3	ribosomal protein L3	232	0	0.5	0	1	1.242	0.18	0.925	FALSE	NA
1154	CISH	cytokine inducible SH2 containing protein	164	0.5	0	0	1	1.055	0.133	0.924	FALSE	NA
80852	GRIP2	glutamate receptor interacting protein 2	12	0	0.5	0	1	0.64	0.036	0.924	FALSE	NA
8886	DDX18	DEAD-box helicase 18	134	0.5	0.5	0	2	1.11	0.147	0.924	FALSE	NA
9909	DENND4B	DENN domain containing 4B	5	0	1	0	1	0.558	0.022	0.924	FALSE	NA
409	ARRB2	arrestin beta 2	251	0	0	0.5	1	1.4	0.219	0.923	FALSE	NA
5522	PPP2R2C	protein phosphatase 2 regulatory subunit Bgamma	23	0	1	0	1	0.824	0.076	0.922	FALSE	NA
1826	DSCAM	DS cell adhesion molecule	9	1	0	0	1	0.664	0.041	0.921	FALSE	NA
5788	PTPRC	protein tyrosine phosphatase receptor type C	39	0	0	1	1	0.921	0.1	0.921	FALSE	NA
26267	FBXO10	F-box protein 10	296	0.5	0	0	1	1.223	0.177	0.92	FALSE	NA
22872	SEC31A	SEC31 homolog A, COPII coat complex component	106	0	0.5	0	1	1.076	0.14	0.919	FALSE	NA
50618	ITSN2	intersectin 2	134	0.5	0	0	1	1.164	0.163	0.917	FALSE	NA
2512	FTL	ferritin light chain	128	0.5	0	0	1	1.182	0.168	0.916	FALSE	NA
10971	YWHAQ	tyrosine 3-monooxygenase/tryptophan 5-monooxygenase activation protein theta	82	0	0	0.5	1	1.089	0.145	0.913	FALSE	NA
11146	GLMN	glomulin, FKBP associated protein	281	0.5	0	0	1	1.226	0.18	0.913	FALSE	NA
26147	PHF19	PHD finger protein 19	36	0.5	0	0	1	0.837	0.081	0.913	FALSE	NA
6188	RPS3	ribosomal protein S3	318	0	0	1	1	1.367	0.215	0.913	FALSE	NA
63891	RNF123	ring finger protein 123	258	0.5	0	0	1	1.187	0.17	0.913	FALSE	NA
160	AP2A1	adaptor related protein complex 2 subunit alpha 1	230	0	0	0.5	1	1.324	0.205	0.911	FALSE	NA
51176	LEF1	lymphoid enhancer binding factor 1	75	0	0	0.5	1	1.071	0.141	0.911	FALSE	NA
3832	KIF11	kinesin family member 11	238	0	0.5	0	1	1.305	0.201	0.909	FALSE	NA
26038	CHD5	chromodomain helicase DNA binding protein 5	44	0	0.5	0	1	0.904	0.099	0.908	FALSE	NA
10487	CAP1	cyclase associated actin cytoskeleton regulatory protein 1	102	0	0.5	0	1	1.121	0.155	0.907	FALSE	NA
8867	SYNJ1	synaptojanin 1	140	0	0	0.5	1	1.151	0.163	0.907	FALSE	NA
9132	KCNQ4	potassium voltage-gated channel subfamily Q member 4	14	0	0.5	0	1	0.711	0.053	0.907	FALSE	NA
22954	TRIM32	tripartite motif containing 32	258	0.5	0	0	1	1.194	0.175	0.904	FALSE	NA
22823	MTF2	metal response element binding transcription factor 2	34	0	0	1	1	0.843	0.085	0.903	FALSE	NA
79837	PIP4K2C	phosphatidylinositol-5-phosphate 4-kinase type 2 gamma	28	0.5	0	0	1	0.807	0.076	0.903	FALSE	NA
1993	ELAVL2	ELAV like RNA binding protein 2	176	0.5	0	0	1	1.149	0.164	0.902	FALSE	NA
270	AMPD1	adenosine monophosphate deaminase 1	23	1	0	0	1	0.785	0.071	0.901	FALSE	NA
3002	GZMB	granzyme B	36	0	0	1	1	0.905	0.101	0.901	FALSE	NA
9686	VGLL4	vestigial like family member 4	4	0	1	0	1	0.523	0.019	0.9	FALSE	NA
4137	MAPT	microtubule associated protein tau	31	0.5	0	0	1	0.867	0.092	0.899	FALSE	NA
55432	YOD1	YOD1 deubiquitinase	9	0	0.5	0.5	2	0.726	0.058	0.898	FALSE	NA
1017	CDK2	cyclin dependent kinase 2	240	0.5	0	0	1	1.356	0.218	0.897	FALSE	NA
91683	SYT12	synaptotagmin 12	3	0	0.5	0	1	0.492	0.015	0.897	FALSE	NA
3921	RPSA	ribosomal protein SA	280	0	0.5	0	1	1.29	0.202	0.896	FALSE	NA
51317	PHF21A	PHD finger protein 21A	83	0	0.5	0	1	1.057	0.142	0.896	FALSE	NA
971	CD72	CD72 molecule	11	0.5	0	0	1	0.61	0.034	0.896	FALSE	NA
10735	STAG2	stromal antigen 2	172	0	0	0.5	1	1.214	0.183	0.895	FALSE	NA
4301	AFDN	afadin, adherens junction formation factor	45	0	0	0.5	1	0.96	0.117	0.895	FALSE	NA
64777	RMND5B	required for meiotic nuclear division 5 homolog B	2	0	0.5	0	1	0.593	0.031	0.895	FALSE	NA
2444	FRK	fyn related Src family tyrosine kinase	144	0.5	0	0	1	1.211	0.183	0.894	FALSE	NA
334	APLP2	amyloid beta precursor like protein 2	114	0.5	0	0	1	1.104	0.155	0.894	FALSE	NA
9103	FCGR2C	Fc fragment of IgG receptor IIc (gene/pseudogene)	70	0	0	0.5	1	1.032	0.136	0.894	FALSE	NA
8500	PPFIA1	PTPRF interacting protein alpha 1	29	0	0	1	1	0.885	0.098	0.893	FALSE	NA
20	ABCA2	ATP binding cassette subfamily A member 2	18	0.5	0	0	1	0.764	0.068	0.892	FALSE	NA
2557	GABRA4	gamma-aminobutyric acid type A receptor alpha4 subunit	17	0	0	0	0	0.756	0.066	0.892	FALSE	NA
5886	RAD23A	RAD23 homolog A, nucleotide excision repair protein	73	0	0	1	1	0.965	0.119	0.892	FALSE	NA
9670	IPO13	importin 13	4	0	0.5	0.5	2	0.496	0.016	0.891	FALSE	NA
1121	CHM	CHM Rab escort protein	118	0	0	0.5	1	1.199	0.181	0.89	FALSE	NA
1241	LTB4R	leukotriene B4 receptor	157	0	0.5	0.5	2	1.084	0.151	0.89	FALSE	NA
201176	ARHGAP27	Rho GTPase activating protein 27	19	0	0.5	0.5	2	0.767	0.069	0.89	FALSE	NA
23411	SIRT1	sirtuin 1	87	0.5	0	0	1	1.067	0.147	0.889	FALSE	NA
513	ATP5F1D	ATP synthase F1 subunit delta	101	0	1	0.5	2	1.144	0.167	0.889	FALSE	NA
84961	FBXL20	F-box and leucine rich repeat protein 20	296	0.5	0	0	1	1.223	0.188	0.888	FALSE	NA
9648	GCC2	GRIP and coiled-coil domain containing 2	42	0.5	0	0.5	2	0.861	0.093	0.888	FALSE	NA
9857	CEP350	centrosomal protein 350	6	0.5	0	0.5	2	0.564	0.027	0.885	FALSE	NA
2559	GABRA6	gamma-aminobutyric acid type A receptor alpha6 subunit	17	0	0	0	0	0.756	0.068	0.883	FALSE	NA
5569	PKIA	cAMP-dependent protein kinase inhibitor alpha	7	0	0	1	1	0.616	0.037	0.883	FALSE	NA
7756	ZNF207	zinc finger protein 207	5	0	1	0.5	2	0.533	0.022	0.883	FALSE	NA
84174	SLA2	Src like adaptor 2	10	0	0.5	0.5	2	0.591	0.032	0.883	FALSE	NA
85015	USP45	ubiquitin specific peptidase 45	5	1	0	0	1	0.687	0.052	0.882	FALSE	NA
9342	SNAP29	synaptosome associated protein 29	87	0.5	0	0	1	1.034	0.141	0.88	FALSE	NA
84294	UTP23	UTP23 small subunit processome component	121	0	1	0	1	1.064	0.15	0.877	FALSE	NA
10096	ACTR3	actin related protein 3	170	0	0	0.5	1	1.268	0.204	0.876	FALSE	NA
81532	MOB2	MOB kinase activator 2	5	0	1	0.5	2	0.552	0.026	0.875	FALSE	NA
100506403	LOC100506403	uncharacterized LOC100506403	162	0	0	0	0	1.262	0.203	0.874	FALSE	NA
55327	LIN7C	lin-7 homolog C, crumbs cell polarity complex component	29	0	0	0.5	1	0.867	0.098	0.874	FALSE	NA
6653	SORL1	sortilin related receptor 1	1	0.5	0	1	2	0.533	0.023	0.873	FALSE	NA
55015	PRPF39	pre-mRNA processing factor 39	23	0.5	0	0.5	2	0.779	0.076	0.872	FALSE	NA
7917	BAG6	BCL2 associated athanogene 6	4	0	1	0	1	0.562	0.028	0.872	FALSE	NA
9542	NRG2	neuregulin 2	44	0	0.5	0	1	0.931	0.116	0.871	FALSE	NA
11031	RAB31	RAB31, member RAS oncogene family	70	0	0.5	0	1	0.984	0.131	0.869	FALSE	NA
32	ACACB	acetyl-CoA carboxylase beta	28	0.5	0	0.5	2	0.824	0.089	0.866	FALSE	NA
5575	PRKAR1B	protein kinase cAMP-dependent type I regulatory subunit beta	82	0	0.5	0	1	1.062	0.153	0.866	FALSE	NA
351	APP	amyloid beta precursor protein	583	0	0.5	0	1	1.565	0.28	0.865	FALSE	NA
5144	PDE4D	phosphodiesterase 4D	5	0	1	0	1	0.534	0.024	0.865	FALSE	NA
695	BTK	Bruton tyrosine kinase	84	0	0	0.5	1	1.057	0.152	0.865	FALSE	NA
85439	STON2	stonin 2	130	0	0.5	0	1	1.112	0.167	0.865	FALSE	NA
8729	GBF1	golgi brefeldin A resistant guanine nucleotide exchange factor 1	115	0.5	0	0	1	1.052	0.151	0.864	FALSE	NA
2065	ERBB3	erb-b2 receptor tyrosine kinase 3	50	0.5	0	0	1	0.915	0.114	0.863	FALSE	NA
23450	SF3B3	splicing factor 3b subunit 3	210	0.5	0	0	1	1.208	0.193	0.863	FALSE	NA
29967	LRP12	LDL receptor related protein 12	19	0	1	0	1	0.706	0.06	0.862	FALSE	NA
9047	SH2D2A	SH2 domain containing 2A	14	0	0	1	1	0.665	0.051	0.86	FALSE	NA
27255	CNTN6	contactin 6	7	1	0	0	1	0.575	0.032	0.859	FALSE	NA
9794	MAML1	mastermind like transcriptional coactivator 1	78	0	0	0.5	1	1.046	0.151	0.859	FALSE	NA
142940	TRUB1	TruB pseudouridine synthase family member 1	30	0	1	0	1	0.762	0.075	0.857	FALSE	NA
57665	RDH14	retinol dehydrogenase 14	1	0	0.5	0	1	0.47	0.015	0.857	FALSE	NA
9640	ZNF592	zinc finger protein 592	5	0.5	0	0.5	2	0.54	0.026	0.857	FALSE	NA
56829	ZC3HAV1	zinc finger CCCH-type containing, antiviral 1	58	0.5	0	0	1	0.933	0.121	0.856	FALSE	NA
7148	TNXB	tenascin XB	12	0	1	0	1	0.629	0.044	0.854	FALSE	NA
9883	POM121	POM121 transmembrane nucleoporin	138	0.5	0	0	1	1.11	0.17	0.854	FALSE	NA
7089	TLE2	TLE family member 2, transcriptional corepressor	46	0	0	0.5	1	0.908	0.115	0.853	FALSE	NA
10043	TOM1	target of myb1 membrane trafficking protein	132	0	0.5	0	1	1.137	0.178	0.852	FALSE	NA
55800	SCN3B	sodium voltage-gated channel beta subunit 3	29	0	0.5	0	1	0.757	0.075	0.852	FALSE	NA
8555	CDC14B	cell division cycle 14B	4	0	1	0.5	2	0.46	0.014	0.852	FALSE	NA
51742	ARID4B	AT-rich interaction domain 4B	55	0	0	1	1	0.92	0.119	0.851	FALSE	NA
23063	WAPL	WAPL cohesin release factor	112	0	0	0.5	1	1.034	0.151	0.849	FALSE	NA
6293	VPS52	VPS52 subunit of GARP complex	45	0	0.5	0.5	2	0.867	0.105	0.849	FALSE	NA
6672	SP100	SP100 nuclear antigen	103	0	0.5	0.5	2	1.052	0.156	0.849	FALSE	NA
1855	DVL1	dishevelled segment polarity protein 1	129	0	0.5	0	1	1.187	0.193	0.848	FALSE	NA
1859	DYRK1A	dual specificity tyrosine phosphorylation regulated kinase 1A	9	1	0	0.5	2	0.595	0.038	0.845	FALSE	NA
408	ARRB1	arrestin beta 1	269	0	0	0.5	1	1.368	0.242	0.843	FALSE	NA
4738	NEDD8	neural precursor cell expressed, developmentally down-regulated 8	272	0.5	0	0	1	1.274	0.218	0.843	FALSE	NA
7321	UBE2D1	ubiquitin conjugating enzyme E2 D1	468	0	0	0.5	1	1.446	0.261	0.843	FALSE	NA
11198	SUPT16H	SPT16 homolog, facilitates chromatin remodeling subunit	121	0.5	0	0	1	1.101	0.172	0.842	FALSE	NA
1593	CYP27A1	cytochrome P450 family 27 subfamily A member 1	16	1	0	0	1	0.706	0.064	0.842	FALSE	NA
4211	MEIS1	Meis homeobox 1	69	0	0	0.5	1	1.015	0.148	0.842	FALSE	NA
6572	SLC18A3	solute carrier family 18 member A3	135	0	0.5	0	1	1.153	0.186	0.842	FALSE	NA
83879	CDCA7	cell division cycle associated 7	31	0	1	0	1	0.79	0.086	0.842	FALSE	NA
9181	ARHGEF2	Rho/Rac guanine nucleotide exchange factor 2	28	0	0.5	0	1	0.813	0.092	0.842	FALSE	NA
79707	NOL9	nucleolar protein 9	127	0	0.5	0.5	2	1.027	0.152	0.841	FALSE	NA
3613	IMPA2	inositol monophosphatase 2	9	0.5	0	0.5	2	0.615	0.043	0.84	FALSE	NA
4733	DRG1	developmentally regulated GTP binding protein 1	13	0	0.5	0.5	2	0.646	0.05	0.84	FALSE	NA
6868	ADAM17	ADAM metallopeptidase domain 17	40	0	0	1	1	0.894	0.115	0.84	FALSE	NA
147111	NOTUM	notum, palmitoleoyl-protein carboxylesterase	112	0.5	0	0	1	1.04	0.156	0.839	FALSE	NA
162466	PHOSPHO1	phosphoethanolamine/phosphocholine phosphatase	9	0	0.5	0	1	0.723	0.069	0.839	FALSE	NA
5657	PRTN3	proteinase 3	89	0	0.5	0	1	0.986	0.141	0.839	FALSE	NA
57534	MIB1	mindbomb E3 ubiquitin protein ligase 1	14	0.5	0	0.5	2	0.754	0.077	0.839	FALSE	NA
1605	DAG1	dystroglycan 1	65	0.5	0	0	1	1.113	0.178	0.834	FALSE	NA
387921	NHLRC3	NHL repeat containing 3	85	0	0.5	0	1	0.977	0.14	0.834	FALSE	NA
11095	ADAMTS8	ADAM metallopeptidase with thrombospondin type 1 motif 8	38	0.5	0.5	0	2	0.883	0.114	0.833	FALSE	NA
177	AGER	advanced glycosylation end-product specific receptor	22	0	0.5	0.5	2	0.774	0.084	0.833	FALSE	NA
221662	RBM24	RNA binding motif protein 24	3	0	0	0	0	0.582	0.037	0.833	FALSE	NA
581	BAX	BCL2 associated X, apoptosis regulator	42	0.5	0	0	1	0.901	0.119	0.833	FALSE	NA
2138	EYA1	EYA transcriptional coactivator and phosphatase 1	25	0	1	0	1	0.773	0.084	0.832	FALSE	NA
23209	MLC1	megalencephalic leukoencephalopathy with subcortical cysts 1	17	0.5	0	0	1	0.696	0.064	0.831	FALSE	NA
6164	RPL34	ribosomal protein L34	238	0	0.5	0	1	1.192	0.201	0.83	FALSE	NA
3053	SERPIND1	serpin family D member 1	121	0.5	0	0	1	1.063	0.166	0.829	FALSE	NA
54971	BANP	BTG3 associated nuclear protein	1	0	1	0	1	0.565	0.034	0.829	FALSE	NA
9014	TAF1B	TATA-box binding protein associated factor, RNA polymerase I subunit B	79	0	0.5	0	1	0.976	0.142	0.828	FALSE	NA
54715	RBFOX1	RNA binding fox-1 homolog 1	1	1	0	0	1	0.659	0.056	0.825	FALSE	NA
79792	GSDMD	gasdermin D	97	0	0.5	0	1	1.061	0.167	0.825	FALSE	NA
10963	STIP1	stress induced phosphoprotein 1	42	0	0	1	1	0.854	0.109	0.822	FALSE	NA
29993	PACSIN1	protein kinase C and casein kinase substrate in neurons 1	120	0	0.5	0	1	1.09	0.176	0.822	FALSE	NA
2280	FKBP1A	FKBP prolyl isomerase 1A	88	0	0	0.5	1	1.069	0.171	0.82	FALSE	NA
28956	LAMTOR2	late endosomal/lysosomal adaptor, MAPK and MTOR activator 2	157	0	0	0.5	1	1.202	0.208	0.82	FALSE	NA
462	SERPINC1	serpin family C member 1	133	0.5	0	0	1	1.118	0.185	0.82	FALSE	NA
5771	PTPN2	protein tyrosine phosphatase non-receptor type 2	40	0	0	1	1	0.863	0.112	0.82	FALSE	NA
64425	POLR1E	RNA polymerase I subunit E	168	0	0	1	1	1.144	0.192	0.82	FALSE	NA
7291	TWIST1	twist family bHLH transcription factor 1	15	0	0.5	0	1	0.651	0.055	0.82	FALSE	NA
760	CA2	carbonic anhydrase 2	7	0.5	0	0.5	2	0.573	0.037	0.82	FALSE	NA
8493	PPM1D	protein phosphatase, Mg2+/Mn2+ dependent 1D	2	1	0	0	1	0.489	0.021	0.82	FALSE	NA
161725	OTUD7A	OTU deubiquitinase 7A	4	1	0	0	1	0.682	0.063	0.819	FALSE	NA
5308	PITX2	paired like homeodomain 2	15	0	0	0.5	1	0.713	0.071	0.819	FALSE	NA
8348	HIST1H2BO	histone cluster 1 H2B family member o	395	0	0	0	0	1.475	0.279	0.818	FALSE	NA
4792	NFKBIA	NFKB inhibitor alpha	160	0	0	0.5	1	1.227	0.216	0.817	FALSE	NA
658	BMPR1B	bone morphogenetic protein receptor type 1B	47	0	0.5	0	1	0.943	0.136	0.817	FALSE	NA
9892	SNAP91	synaptosome associated protein 91	118	0	0.5	0	1	1.088	0.178	0.816	FALSE	NA
2735	GLI1	GLI family zinc finger 1	112	0.5	0	0	1	1.077	0.175	0.815	FALSE	NA
3018	HIST1H2BB	histone cluster 1 H2B family member b	415	0	0	0	0	1.483	0.282	0.815	FALSE	NA
6142	RPL18A	ribosomal protein L18a	260	0	0.5	0	1	1.239	0.22	0.815	FALSE	NA
7068	THRB	thyroid hormone receptor beta	22	0.5	0	0	1	0.743	0.08	0.815	FALSE	NA
27115	PDE7B	phosphodiesterase 7B	5	0	1	0	1	0.534	0.03	0.813	FALSE	NA
8110	DPF3	double PHD fingers 3	52	0.5	0	0	1	0.897	0.124	0.813	FALSE	NA
5604	MAP2K1	mitogen-activated protein kinase kinase 1	147	0	0	0.5	1	1.205	0.212	0.812	FALSE	NA
9306	SOCS6	suppressor of cytokine signaling 6	147	0	0.5	0	1	1.008	0.157	0.811	FALSE	NA
255626	HIST1H2BA	histone cluster 1 H2B family member a	419	0	0	0	0	1.541	0.298	0.81	FALSE	NA
6117	RPA1	replication protein A1	245	0.5	0	0	1	1.357	0.253	0.81	FALSE	NA
51085	MLXIPL	MLX interacting protein like	27	0.5	0	0	1	0.809	0.1	0.809	FALSE	NA
5787	PTPRB	protein tyrosine phosphatase receptor type B	117	0.5	0	0	1	1.061	0.173	0.808	FALSE	NA
27087	B3GAT1	beta-1,3-glucuronyltransferase 1	24	0.5	0	0.5	2	0.757	0.086	0.807	FALSE	NA
2555	GABRA2	gamma-aminobutyric acid type A receptor alpha2 subunit	20	0	0	0	0	0.778	0.092	0.806	FALSE	NA
1977	EIF4E	eukaryotic translation initiation factor 4E	222	0	0	0.5	1	1.239	0.224	0.805	FALSE	NA
23142	DCUN1D4	defective in cullin neddylation 1 domain containing 4	177	0.5	0	0	1	1.029	0.165	0.805	FALSE	NA
55034	MOCOS	molybdenum cofactor sulfurase	1	0	0	0	0	0.497	0.024	0.805	FALSE	NA
54820	NDE1	nudE neurodevelopment protein 1	209	0	0	0.5	1	1.182	0.209	0.804	FALSE	NA
59	ACTA2	actin alpha 2, smooth muscle	59	0	0	0.5	1	0.955	0.144	0.804	FALSE	NA
1003	CDH5	cadherin 5	35	0.5	0	0	1	0.854	0.115	0.802	FALSE	NA
54545	MTMR12	myotubularin related protein 12	5	0.5	0	0.5	2	0.5	0.025	0.8	FALSE	NA
6206	RPS12	ribosomal protein S12	260	0	0.5	0	1	1.214	0.219	0.8	FALSE	NA
79871	RPAP2	RNA polymerase II associated protein 2	77	0	0	1	1	0.927	0.137	0.8	FALSE	NA
5981	RFC1	replication factor C subunit 1	134	0	0.5	0	1	1.121	0.194	0.798	FALSE	NA
2554	GABRA1	gamma-aminobutyric acid type A receptor alpha1 subunit	19	0	0	0	0	0.755	0.088	0.797	FALSE	NA
9793	CKAP5	cytoskeleton associated protein 5	225	0	0	0.5	1	1.219	0.222	0.797	FALSE	NA
1962	EHHADH	enoyl-CoA hydratase and 3-hydroxyacyl CoA dehydrogenase	117	0.5	0	0	1	1.203	0.218	0.796	FALSE	NA
29101	SSU72	SSU72 homolog, RNA polymerase II CTD phosphatase	84	0	0.5	0	1	0.946	0.144	0.796	FALSE	NA
3200	HOXA3	homeobox A3	57	0	0.5	0	1	0.895	0.129	0.796	FALSE	NA
23076	RRP1B	ribosomal RNA processing 1B	68	0	0.5	0.5	2	0.849	0.116	0.795	FALSE	NA
1140	CHRNB1	cholinergic receptor nicotinic beta 1 subunit	16	0.5	0	0	1	0.706	0.075	0.794	FALSE	NA
60684	TRAPPC11	trafficking protein particle complex 11	21	0.5	0	0	1	0.688	0.07	0.794	FALSE	NA
6502	SKP2	S-phase kinase associated protein 2	382	0	0	0.5	1	1.262	0.235	0.794	FALSE	NA
8331	HIST1H2AJ	histone cluster 1 H2A family member j	361	0	0	0	0	1.448	0.283	0.794	FALSE	NA
5175	PECAM1	platelet and endothelial cell adhesion molecule 1	31	0	0	0.5	1	0.758	0.09	0.793	FALSE	NA
59350	RXFP1	relaxin family peptide receptor 1	124	0	1	0	1	0.979	0.155	0.793	FALSE	NA
8993	PGLYRP1	peptidoglycan recognition protein 1	85	0	0.5	0	1	0.986	0.157	0.793	FALSE	NA
10130	PDIA6	protein disulfide isomerase family A member 6	120	0.5	0	0	1	1.065	0.181	0.791	FALSE	NA
5547	PRCP	prolylcarboxypeptidase	63	0.5	0	0	1	0.866	0.122	0.791	FALSE	NA
2042	EPHA3	EPH receptor A3	37	0	0.5	0	1	0.789	0.1	0.789	FALSE	NA
382	ARF6	ADP ribosylation factor 6	117	0	0	0.5	1	1.189	0.217	0.789	FALSE	NA
2017	CTTN	cortactin	161	0	0	0.5	1	1.129	0.201	0.787	FALSE	NA
22933	SIRT2	sirtuin 2	22	0	0.5	0	1	0.71	0.078	0.787	FALSE	NA
7434	VIPR2	vasoactive intestinal peptide receptor 2	118	0	1	0	1	0.968	0.154	0.787	FALSE	NA
4436	MSH2	mutS homolog 2	69	0	0	1	1	0.941	0.146	0.786	FALSE	NA
8342	HIST1H2BM	histone cluster 1 H2B family member m	388	0	0	0	0	1.474	0.293	0.786	FALSE	NA
3685	ITGAV	integrin subunit alpha V	221	0	0	0.5	1	1.315	0.253	0.785	FALSE	NA
29119	CTNNA3	catenin alpha 3	11	0.5	0	0	1	0.611	0.052	0.784	FALSE	NA
824	CAPN2	calpain 2	24	0	0.5	0	1	0.764	0.094	0.784	FALSE	NA
8562	DENR	density regulated re-initiation and release factor	32	1	0	0	1	0.719	0.081	0.784	FALSE	NA
1660	DHX9	DExH-box helicase 9	248	0	0	0.5	1	1.209	0.225	0.783	FALSE	NA
79888	LPCAT1	lysophosphatidylcholine acyltransferase 1	71	0	0.5	0	1	0.944	0.148	0.783	FALSE	NA
4488	MSX2	msh homeobox 2	9	0.5	0	0	1	0.581	0.045	0.782	FALSE	NA
322	APBB1	amyloid beta precursor protein binding family B member 1	27	1	0	0	1	0.798	0.105	0.781	FALSE	NA
9185	REPS2	RALBP1 associated Eps domain containing 2	119	0.5	0	0	1	1.032	0.175	0.781	FALSE	NA
10482	NXF1	nuclear RNA export factor 1	86	0	0.5	0	1	0.94	0.148	0.78	FALSE	NA
3014	H2AFX	H2A histone family member X	358	0	0	0	0	1.533	0.31	0.78	FALSE	NA
966	CD59	CD59 molecule (CD59 blood group)	246	0	0	0.5	1	1.28	0.246	0.78	FALSE	NA
1175	AP2S1	adaptor related protein complex 2 subunit sigma 1	211	0	0	0.5	1	1.231	0.233	0.779	FALSE	NA
2209	FCGR1A	Fc fragment of IgG receptor Ia	145	0	0	0.5	1	1.203	0.225	0.779	FALSE	NA
8345	HIST1H2BH	histone cluster 1 H2B family member h	393	0	0	0	0	1.475	0.297	0.778	FALSE	NA
9739	SETD1A	SET domain containing 1A, histone lysine methyltransferase	61	0	0	0.5	1	0.911	0.14	0.778	FALSE	NA
26088	GGA1	golgi associated, gamma adaptin ear containing, ARF binding protein 1	22	0	0.5	0	1	0.777	0.1	0.777	FALSE	NA
55629	PNRC2	proline rich nuclear receptor coactivator 2	112	0	0	1	1	0.953	0.153	0.777	FALSE	NA
64333	ARHGAP9	Rho GTPase activating protein 9	19	0.5	0	0.5	2	0.727	0.086	0.775	FALSE	NA
915	CD3D	CD3d molecule	188	0	0	0.5	1	1.228	0.234	0.775	FALSE	NA
65980	BRD9	bromodomain containing 9	3	0	0.5	0	1	0.417	0.014	0.774	FALSE	NA
8703	B4GALT3	beta-1,4-galactosyltransferase 3	42	0	1	0	1	0.933	0.148	0.774	FALSE	NA
11228	RASSF8	Ras association domain family member 8	3	0	1	0	1	0.43	0.016	0.773	FALSE	NA
477	ATP1A2	ATPase Na+/K+ transporting subunit alpha 2	28	0	0.5	0	1	0.812	0.112	0.772	FALSE	NA
551	AVP	arginine vasopressin	370	0	0.5	0	1	1.3	0.255	0.771	FALSE	NA
10765	KDM5B	lysine demethylase 5B	4	1	0.5	0.5	3	0.453	0.02	0.77	FALSE	NA
3015	H2AFZ	H2A histone family member Z	322	0	0	0	0	1.369	0.274	0.77	FALSE	NA
3678	ITGA5	integrin subunit alpha 5	54	0.5	0	0	1	0.879	0.133	0.77	FALSE	NA
56853	CELF4	CUGBP Elav-like family member 4	1	1	0	0	1	0.435	0.017	0.77	FALSE	NA
3622	ING2	inhibitor of growth family member 2	51	0	0	0.5	1	0.878	0.133	0.769	FALSE	NA
2729	GCLC	glutamate-cysteine ligase catalytic subunit	26	0	1	0	1	0.765	0.099	0.768	FALSE	NA
253782	CERS6	ceramide synthase 6	5	0.5	0.5	0.5	3	0.503	0.03	0.766	FALSE	NA
8338	HIST2H2AC	histone cluster 2 H2A family member c	369	0	0	0	0	1.464	0.3	0.766	FALSE	NA
2495	FTH1	ferritin heavy chain 1	98	0	0.5	0	1	1.027	0.18	0.765	FALSE	NA
5348	FXYD1	FXYD domain containing ion transport regulator 1	23	0	0	0.5	1	0.772	0.102	0.765	FALSE	NA
688	KLF5	Kruppel like factor 5	6	0	0.5	1	2	0.495	0.029	0.762	FALSE	NA
8974	P4HA2	prolyl 4-hydroxylase subunit alpha 2	55	1	0	0	1	0.911	0.146	0.761	FALSE	NA
23624	CBLC	Cbl proto-oncogene C	18	0	0.5	0	1	0.703	0.083	0.76	FALSE	NA
3817	KLK2	kallikrein related peptidase 2	32	0	1	0	1	0.786	0.108	0.76	FALSE	NA
7353	UFD1	ubiquitin recognition factor in ER associated degradation 1	37	0.5	0	0	1	0.855	0.129	0.76	FALSE	NA
1717	DHCR7	7-dehydrocholesterol reductase	20	1	0	0	1	0.746	0.096	0.759	FALSE	NA
26009	ZZZ3	zinc finger ZZ-type containing 3	11	0.5	0	0.5	2	0.539	0.039	0.759	FALSE	NA
5053	PAH	phenylalanine hydroxylase	25	1	0	0	1	0.766	0.102	0.759	FALSE	NA
102724334	LOC102724334	histone H2B type F-S-like	358	0	0	0	0	1.416	0.292	0.757	FALSE	NA
25896	INTS7	integrator complex subunit 7	75	0	0.5	0	1	0.906	0.146	0.757	FALSE	NA
83706	FERMT3	fermitin family member 3	81	0	0.5	0.5	2	0.97	0.166	0.757	FALSE	NA
23211	ZC3H4	zinc finger CCCH-type containing 4	4	1	0	1	2	0.466	0.024	0.755	FALSE	NA
950	SCARB2	scavenger receptor class B member 2	119	0.5	0	0	1	1.037	0.187	0.755	FALSE	NA
26168	SENP3	SUMO specific peptidase 3	153	0	0.5	0	1	1.056	0.193	0.754	FALSE	NA
30846	EHD2	EH domain containing 2	17	0.5	0	0	1	0.628	0.063	0.754	FALSE	NA
9026	HIP1R	huntingtin interacting protein 1 related	157	0	0	0.5	1	1.127	0.214	0.754	FALSE	NA
122809	SOCS4	suppressor of cytokine signaling 4	7	0	0.5	0.5	2	0.526	0.037	0.753	FALSE	NA
23250	ATP11A	ATPase phospholipid transporting 11A	112	0	0.5	0	1	1.011	0.18	0.753	FALSE	NA
9466	IL27RA	interleukin 27 receptor subunit alpha	14	0	0	1	1	0.634	0.065	0.753	FALSE	NA
10498	CARM1	coactivator associated arginine methyltransferase 1	118	0	0	0.5	1	1.097	0.206	0.752	FALSE	NA
11099	PTPN21	protein tyrosine phosphatase non-receptor type 21	5	0	0.5	0	1	0.542	0.041	0.752	FALSE	NA
8340	HIST1H2BL	histone cluster 1 H2B family member l	392	0	0	0	0	1.474	0.309	0.752	FALSE	NA
10370	CITED2	Cbp/p300 interacting transactivator with Glu/Asp rich carboxy-terminal domain 2	33	0	0.5	0	1	0.783	0.11	0.751	FALSE	NA
116984	ARAP2	ArfGAP with RhoGAP domain, ankyrin repeat and PH domain 2	28	0	0	1	1	0.751	0.1	0.751	FALSE	NA
3425	IDUA	iduronidase alpha-L-	10	0	0.5	0	1	0.61	0.059	0.75	FALSE	NA
1639	DCTN1	dynactin subunit 1	173	0	0	0.5	1	1.199	0.237	0.749	FALSE	NA
5195	PEX14	peroxisomal biogenesis factor 14	61	0	0.5	0.5	2	0.948	0.162	0.749	FALSE	NA
388	RHOB	ras homolog family member B	181	0	0	0	0	1.267	0.257	0.748	FALSE	NA
6921	ELOC	elongin C	435	0	0	0.5	1	1.282	0.261	0.748	FALSE	NA
9856	KIAA0319	KIAA0319	118	0.5	0	0	1	1.031	0.188	0.748	FALSE	NA
30834	ZNRD1	zinc ribbon domain containing 1	101	0	0.5	0	1	0.957	0.166	0.747	FALSE	NA
83737	ITCH	itchy E3 ubiquitin protein ligase	338	0	0	0.5	1	1.187	0.235	0.746	FALSE	NA
1633	DCK	deoxycytidine kinase	55	0	0	0.5	1	0.98	0.174	0.745	FALSE	NA
150274	HSCB	HscB mitochondrial iron-sulfur cluster cochaperone	35	0	0	1	1	0.839	0.13	0.744	FALSE	NA
23654	PLXNB2	plexin B2	12	0.5	0	0	1	0.627	0.065	0.744	FALSE	NA
4637	MYL6	myosin light chain 6	52	0.5	0	0	1	0.906	0.151	0.744	FALSE	NA
5027	P2RX7	purinergic receptor P2X 7	7	0	0.5	0.5	2	0.634	0.067	0.744	FALSE	NA
55437	STRADB	STE20 related adaptor beta	20	0	0.5	0	1	0.695	0.085	0.744	FALSE	NA
9146	HGS	hepatocyte growth factor-regulated tyrosine kinase substrate	157	0.5	0	0	1	1.155	0.227	0.744	FALSE	NA
23648	SSBP3	single stranded DNA binding protein 3	11	0	0.5	0.5	2	0.622	0.064	0.743	FALSE	NA
1783	DYNC1LI2	dynein cytoplasmic 1 light intermediate chain 2	238	0	0	0.5	1	1.201	0.241	0.742	FALSE	NA
5696	PSMB8	proteasome subunit beta 8	242	0	0	0.5	1	1.199	0.241	0.741	FALSE	NA
9725	TMEM63A	transmembrane protein 63A	112	0	0.5	0	1	1.011	0.185	0.741	FALSE	NA
5783	PTPN13	protein tyrosine phosphatase non-receptor type 13	23	0.5	0	0	1	0.691	0.085	0.74	FALSE	NA
6923	ELOB	elongin B	427	0	0	0.5	1	1.261	0.259	0.74	FALSE	NA
701	BUB1B	BUB1 mitotic checkpoint serine/threonine kinase B	287	0	0	0.5	1	1.242	0.254	0.739	FALSE	NA
3172	HNF4A	hepatocyte nuclear factor 4 alpha	4	0	0.5	0	1	0.48	0.029	0.738	FALSE	NA
5243	ABCB1	ATP binding cassette subfamily B member 1	6	0	0	1	1	0.575	0.052	0.738	FALSE	NA
57111	RAB25	RAB25, member RAS oncogene family	66	0	0.5	0	1	0.886	0.147	0.738	FALSE	NA
1124	CHN2	chimerin 2	19	0.5	0	0.5	2	0.727	0.097	0.737	FALSE	NA
1655	DDX5	DEAD-box helicase 5	208	0	0	0.5	1	1.107	0.216	0.737	FALSE	NA
4317	MMP8	matrix metallopeptidase 8	90	0.5	0	0	1	0.987	0.179	0.737	FALSE	NA
6310	ATXN1	ataxin 1	3	0	0	0	0	0.638	0.07	0.737	FALSE	NA
8349	HIST2H2BE	histone cluster 2 H2B family member e	403	0	0	0	0	1.472	0.316	0.737	FALSE	NA
10533	ATG7	autophagy related 7	326	0	0	0.5	1	1.208	0.246	0.736	FALSE	NA
253260	RICTOR	RPTOR independent companion of MTOR complex 2	17	0	0	0.5	1	0.668	0.079	0.736	FALSE	NA
967	CD63	CD63 molecule	57	0.5	0	0	1	0.857	0.139	0.735	FALSE	NA
23429	RYBP	RING1 and YY1 binding protein	28	0	0	0.5	1	0.721	0.096	0.734	FALSE	NA
26054	SENP6	SUMO specific peptidase 6	4	0	0	1	1	0.504	0.035	0.734	FALSE	NA
2889	RAPGEF1	Rap guanine nucleotide exchange factor 1	36	0	0	0.5	1	0.791	0.118	0.734	FALSE	NA
29079	MED4	mediator complex subunit 4	66	0	0	0.5	1	0.88	0.147	0.733	FALSE	NA
182	JAG1	jagged canonical Notch ligand 1	24	0	0.5	0	1	0.734	0.101	0.731	FALSE	NA
22821	RASA3	RAS p21 protein activator 3	15	0	0.5	0	1	0.606	0.062	0.731	FALSE	NA
324	APC	APC regulator of WNT signaling pathway	129	0	0	0.5	1	1.072	0.208	0.731	FALSE	NA
6810	STX4	syntaxin 4	62	0	0	0.5	1	0.94	0.167	0.731	FALSE	NA
857	CAV1	caveolin 1	62	0.5	0	0	1	0.912	0.158	0.731	FALSE	NA
23414	ZFPM2	zinc finger protein, FOG family member 2	7	0	0.5	0	1	0.502	0.035	0.73	FALSE	NA
3831	KLC1	kinesin light chain 1	124	0.5	0	0	1	1.016	0.191	0.73	FALSE	NA
344787	ZNF860	zinc finger protein 860	1	0	0.5	0.5	2	0.937	0.167	0.729	FALSE	NA
9685	CLINT1	clathrin interactor 1	47	0	0	1	1	0.809	0.126	0.728	FALSE	NA
80059	LRRTM4	leucine rich repeat transmembrane neuronal 4	3	0.5	0	0	1	0.459	0.026	0.727	FALSE	NA
9249	DHRS3	dehydrogenase/reductase 3	15	0	1	1	2	0.662	0.08	0.727	FALSE	NA
5725	PTBP1	polypyrimidine tract binding protein 1	212	0	0	0.5	1	1.094	0.217	0.726	FALSE	NA
23529	CLCF1	cardiotrophin like cytokine factor 1	7	0	0.5	0	1	0.546	0.047	0.725	FALSE	NA
2775	GNAO1	G protein subunit alpha o1	120	0	0.5	0	1	1.038	0.2	0.725	FALSE	NA
196527	ANO6	anoctamin 6	115	0	0.5	0	1	1.042	0.202	0.724	FALSE	NA
345	APOC3	apolipoprotein C3	54	0.5	0	0	1	0.876	0.15	0.722	FALSE	NA
55845	BRK1	BRICK1 subunit of SCAR/WAVE actin nucleating complex	52	0	0	0.5	1	0.836	0.137	0.722	FALSE	NA
8334	HIST1H2AC	histone cluster 1 H2A family member c	388	0	0	0	0	1.459	0.32	0.722	FALSE	NA
2316	FLNA	filamin A	41	0.5	0	0	1	0.833	0.136	0.721	FALSE	NA
51110	LACTB2	lactamase beta 2	1	0.5	0	0.5	2	0.401	0.016	0.721	FALSE	NA
9184	BUB3	BUB3 mitotic checkpoint protein	187	0	0	0.5	1	1.104	0.222	0.721	FALSE	NA
23405	DICER1	dicer 1, ribonuclease III	33	0.5	0	0	1	0.733	0.104	0.72	FALSE	NA
5218	CDK14	cyclin dependent kinase 14	19	0	0	1	1	0.624	0.07	0.72	FALSE	NA
54931	TRMT10C	tRNA methyltransferase 10C, mitochondrial RNase P subunit	25	0	0.5	0	1	0.657	0.08	0.72	FALSE	NA
8301	PICALM	phosphatidylinositol binding clathrin assembly protein	162	0	0	0.5	1	1.111	0.225	0.72	FALSE	NA
10319	LAMC3	laminin subunit gamma 3	44	0.5	0	0	1	0.808	0.129	0.719	FALSE	NA
4199	ME1	malic enzyme 1	45	0.5	0	0	1	0.849	0.142	0.719	FALSE	NA
5336	PLCG2	phospholipase C gamma 2	124	0	0	0	0	1.076	0.215	0.719	FALSE	NA
6434	TRA2B	transformer 2 beta homolog	174	0	0	0.5	1	1.061	0.21	0.719	FALSE	NA
9879	DDX46	DEAD-box helicase 46	184	0	0	0.5	1	1.039	0.203	0.719	FALSE	NA
2321	FLT1	fms related tyrosine kinase 1	28	0	0.5	0	1	0.746	0.109	0.718	FALSE	NA
341359	SYT10	synaptotagmin 10	5	0	0.5	0	1	0.513	0.04	0.718	FALSE	NA
54778	RNF111	ring finger protein 111	292	0	0	0.5	1	1.115	0.227	0.718	FALSE	NA
6694	SPP2	secreted phosphoprotein 2	123	0.5	0	0	1	1.053	0.208	0.718	FALSE	NA
8970	HIST1H2BJ	histone cluster 1 H2B family member j	426	0	0	0	0	1.494	0.331	0.718	FALSE	NA
1173	AP2M1	adaptor related protein complex 2 subunit mu 1	223	0	0	0.5	1	1.24	0.264	0.717	FALSE	NA
23163	GGA3	golgi associated, gamma adaptin ear containing, ARF binding protein 3	27	0.5	0	0	1	0.748	0.11	0.717	FALSE	NA
283149	BCL9L	BCL9 like	45	0	0	0.5	1	0.769	0.117	0.717	FALSE	NA
50486	G0S2	G0/G1 switch 2	15	0	0.5	0	1	0.608	0.066	0.717	FALSE	NA
57403	RAB22A	RAB22A, member RAS oncogene family	66	0	0	1	1	0.858	0.146	0.717	FALSE	NA
85236	HIST1H2BK	histone cluster 1 H2B family member k	424	0	0	0	0	1.497	0.332	0.717	FALSE	NA
55879	GABRQ	gamma-aminobutyric acid type A receptor theta subunit	13	0	0	0	0	0.613	0.068	0.715	FALSE	NA
5091	PC	pyruvate carboxylase	53	0	0.5	0	1	0.926	0.17	0.713	FALSE	NA
90121	TSR2	TSR2 ribosome maturation factor	75	0.5	0	0.5	2	0.847	0.144	0.713	FALSE	NA
6187	RPS2	ribosomal protein S2	328	0.5	0	0	1	1.248	0.269	0.712	FALSE	NA
117177	RAB3IP	RAB3A interacting protein	123	0	0	0.5	1	1.039	0.207	0.71	FALSE	NA
79811	SLTM	SAFB like transcription modulator	5	0	0.5	0	1	0.438	0.024	0.71	FALSE	NA
2319	FLOT2	flotillin 2	11	0	0.5	0	1	0.566	0.056	0.709	FALSE	NA
54893	MTMR10	myotubularin related protein 10	1	0.5	0	0.5	2	0.483	0.034	0.709	FALSE	NA
5687	PSMA6	proteasome subunit alpha 6	217	0	0	0.5	1	1.128	0.235	0.709	FALSE	NA
5729	PTGDR	prostaglandin D2 receptor	138	0	0	1	1	1.107	0.229	0.709	FALSE	NA
388552	BLOC1S3	biogenesis of lysosomal organelles complex 1 subunit 3	51	0	0.5	0	1	0.814	0.135	0.708	FALSE	NA
4850	CNOT4	CCR4-NOT transcription complex subunit 4	28	0.5	0	0.5	2	0.72	0.104	0.708	FALSE	NA
7322	UBE2D2	ubiquitin conjugating enzyme E2 D2	382	0	0	0.5	1	1.252	0.272	0.708	FALSE	NA
134957	STXBP5	syntaxin binding protein 5	7	1	0	0	1	0.49	0.036	0.707	FALSE	NA
1742	DLG4	discs large MAGUK scaffold protein 4	89	0	0	0	0	1.095	0.226	0.707	FALSE	NA
23096	IQSEC2	IQ motif and Sec7 domain 2	5	1	0	0	1	0.459	0.029	0.706	FALSE	NA
7764	ZNF217	zinc finger protein 217	76	0	0	0.5	1	0.902	0.165	0.706	FALSE	NA
10423	CDIPT	CDP-diacylglycerol--inositol 3-phosphatidyltransferase	43	0.5	0	0	1	0.977	0.19	0.705	FALSE	NA
26289	AK5	adenylate kinase 5	32	0.5	0	0.5	2	0.765	0.12	0.705	FALSE	NA
2624	GATA2	GATA binding protein 2	24	0	0	0.5	1	0.701	0.099	0.704	FALSE	NA
115509	ZNF689	zinc finger protein 689	2	0	1	0	1	0.674	0.091	0.701	FALSE	NA
8341	HIST1H2BN	histone cluster 1 H2B family member n	400	0	0	0	0	1.487	0.338	0.7	FALSE	NA
6175	RPLP0	ribosomal protein lateral stalk subunit P0	244	0.5	0	0	1	1.131	0.241	0.699	FALSE	NA
150372	NFAM1	NFAT activating protein with ITAM motif 1	54	0.5	0	0	1	0.817	0.14	0.697	FALSE	NA
2261	FGFR3	fibroblast growth factor receptor 3	46	0.5	0	0	1	0.822	0.142	0.697	FALSE	NA
25839	COG4	component of oligomeric golgi complex 4	114	0	0	0.5	1	1.008	0.204	0.696	FALSE	NA
57510	XPO5	exportin 5	14	0.5	0	0	1	0.587	0.065	0.696	FALSE	NA
8837	CFLAR	CASP8 and FADD like apoptosis regulator	19	0	1	0.5	2	0.622	0.076	0.696	FALSE	NA
9079	LDB2	LIM domain binding 2	5	0	0.5	0	1	0.47	0.033	0.696	FALSE	NA
22856	CHSY1	chondroitin sulfate synthase 1	11	0.5	1	0	2	0.562	0.058	0.695	FALSE	NA
26224	FBXL3	F-box and leucine rich repeat protein 3	318	0	0	0.5	1	1.117	0.239	0.695	FALSE	NA
54734	RAB39A	RAB39A, member RAS oncogene family	75	0.5	0	0	1	0.921	0.176	0.695	FALSE	NA
3190	HNRNPK	heterogeneous nuclear ribonucleoprotein K	208	0	0	0.5	1	1.095	0.232	0.694	FALSE	NA
718	C3	complement C3	444	0.5	0	0	1	1.371	0.312	0.694	FALSE	NA
9918	NCAPD2	non-SMC condensin I complex subunit D2	54	0.5	0	0	1	0.812	0.14	0.694	FALSE	NA
474382	H2AFB1	H2A histone family member B1	328	0	0	0	0	1.344	0.305	0.693	FALSE	NA
54145	H2BFS	H2B histone family member S	358	0	0	0	0	1.416	0.324	0.693	FALSE	NA
8575	PRKRA	protein activator of interferon induced protein kinase EIF2AK2	42	0	0.5	0	1	0.835	0.148	0.693	FALSE	NA
3181	HNRNPA2B1	heterogeneous nuclear ribonucleoprotein A2/B1	198	0	0	0.5	1	1.05	0.219	0.692	FALSE	NA
57794	SUGP1	SURP and G-patch domain containing 1	204	0	0	0.5	1	1.104	0.236	0.692	FALSE	NA
4085	MAD2L1	mitotic arrest deficient 2 like 1	266	0	0	0.5	1	1.195	0.264	0.691	FALSE	NA
10402	ST3GAL6	ST3 beta-galactoside alpha-2,3-sialyltransferase 6	28	0.5	0	0.5	2	0.747	0.119	0.69	FALSE	NA
3572	IL6ST	interleukin 6 signal transducer	43	0	0	0.5	1	0.858	0.157	0.69	FALSE	NA
51388	NIP7	nucleolar pre-rRNA processing protein NIP7	182	0	0	1	1	1.056	0.222	0.69	FALSE	NA
65117	RSRC2	arginine and serine rich coiled-coil 2	1	0	0.5	0.5	2	0.411	0.021	0.69	FALSE	NA
79058	ASPSCR1	ASPSCR1 tether for SLC2A4, UBX domain containing	28	0.5	0	0	1	0.734	0.115	0.69	FALSE	NA
8692	HYAL2	hyaluronidase 2	9	0	1	0	1	0.541	0.053	0.69	FALSE	NA
23066	CAND2	cullin associated and neddylation dissociated 2 (putative)	4	0.5	0	0	1	0.43	0.025	0.689	FALSE	NA
26468	LHX6	LIM homeobox 6	5	0.5	0.5	0	2	0.474	0.035	0.689	FALSE	NA
3684	ITGAM	integrin subunit alpha M	183	0	0	0.5	1	1.165	0.256	0.689	FALSE	NA
26999	CYFIP2	cytoplasmic FMR1 interacting protein 2	61	0	0	0.5	1	0.897	0.171	0.688	FALSE	NA
5706	PSMC6	proteasome 26S subunit, ATPase 6	206	0	0	0.5	1	1.11	0.24	0.688	FALSE	NA
11176	BAZ2A	bromodomain adjacent to zinc finger domain 2A	55	0.5	0	0	1	0.854	0.157	0.687	FALSE	NA
317772	HIST2H2AB	histone cluster 2 H2A family member b	122	0	0	0.5	1	1.025	0.214	0.687	FALSE	NA
5583	PRKCH	protein kinase C eta	39	0	0	1	1	0.775	0.13	0.687	FALSE	NA
6789	STK4	serine/threonine kinase 4	22	0	0	0.5	1	0.687	0.1	0.687	FALSE	NA
22916	NCBP2	nuclear cap binding protein subunit 2	463	0	0	0.5	1	1.386	0.32	0.686	FALSE	NA
7456	WIPF1	WAS/WASL interacting protein family member 1	41	0	0	0.5	1	0.78	0.133	0.684	FALSE	NA
2521	FUS	FUS RNA binding protein	187	0	0	0.5	1	1.045	0.222	0.683	FALSE	NA
4212	MEIS2	Meis homeobox 2	13	1	0	0	1	0.665	0.094	0.683	FALSE	NA
7335	UBE2V1	ubiquitin conjugating enzyme E2 V1	308	0	0	0.5	1	1.134	0.25	0.683	FALSE	NA
2963	GTF2F2	general transcription factor IIF subunit 2	322	0	0	0.5	1	1.244	0.283	0.682	FALSE	NA
3071	NCKAP1L	NCK associated protein 1 like	52	0	0	0.5	1	0.836	0.153	0.682	FALSE	NA
493	ATP2B4	ATPase plasma membrane Ca2+ transporting 4	8	0.5	0	0.5	2	0.538	0.054	0.682	FALSE	NA
6829	SUPT5H	SPT5 homolog, DSIF elongation factor subunit	125	0	0.5	0	1	1.016	0.213	0.682	FALSE	NA
81704	DOCK8	dedicator of cytokinesis 8	7	1	0	0.5	2	0.714	0.111	0.682	FALSE	NA
9246	UBE2L6	ubiquitin conjugating enzyme E2 L6	302	0	0	0.5	1	1.166	0.26	0.682	FALSE	NA
196528	ARID2	AT-rich interaction domain 2	30	0	0	0.5	1	0.704	0.108	0.681	FALSE	NA
5704	PSMC4	proteasome 26S subunit, ATPase 4	246	0	0	0.5	1	1.17	0.262	0.681	FALSE	NA
59271	EVA1C	eva-1 homolog C	1	0.5	0.5	0	2	0.415	0.023	0.68	FALSE	NA
6428	SRSF3	serine and arginine rich splicing factor 3	236	0	0	0.5	1	1.107	0.243	0.68	FALSE	NA
23523	CABIN1	calcineurin binding protein 1	40	0	0	0.5	1	0.836	0.154	0.679	FALSE	NA
6556	SLC11A1	solute carrier family 11 member 1	71	0	0.5	0	1	0.856	0.161	0.679	FALSE	NA
8535	CBX4	chromobox 4	127	0	0	0.5	1	1.021	0.216	0.679	FALSE	NA
4617	MYF5	myogenic factor 5	14	0	0	0	0	0.596	0.073	0.678	FALSE	NA
55844	PPP2R2D	protein phosphatase 2 regulatory subunit Bdelta	40	0.5	0	0	1	0.795	0.14	0.678	FALSE	NA
3175	ONECUT1	one cut homeobox 1	6	0	1	0	1	0.548	0.058	0.677	FALSE	NA
682	BSG	basigin (Ok blood group)	29	0	0	0	0	0.93	0.187	0.677	FALSE	NA
302	ANXA2	annexin A2	105	0	0	0.5	1	1.013	0.215	0.676	FALSE	NA
5695	PSMB7	proteasome subunit beta 7	203	0	0	0.5	1	1.117	0.248	0.676	FALSE	NA
4594	MMUT	methylmalonyl-CoA mutase	15	0	0.5	0.5	2	0.632	0.086	0.673	FALSE	NA
5693	PSMB5	proteasome subunit beta 5	202	0	0	0.5	1	1.102	0.245	0.673	FALSE	NA
79654	HECTD3	HECT domain E3 ubiquitin protein ligase 3	256	0	0	0.5	1	0.993	0.21	0.673	FALSE	NA
820	CAMP	cathelicidin antimicrobial peptide	89	0.5	0	0	1	0.939	0.193	0.671	FALSE	NA
8899	PRPF4B	pre-mRNA processing factor 4B	6	0	0	1	1	0.48	0.04	0.671	FALSE	NA
3796	KIF2A	kinesin family member 2A	218	0	0	0.5	1	1.126	0.254	0.67	FALSE	NA
5684	PSMA3	proteasome subunit alpha 3	247	0	0	0.5	1	1.162	0.265	0.67	FALSE	NA
10006	ABI1	abl interactor 1	68	0	0	0.5	1	0.875	0.172	0.669	FALSE	NA
23198	PSME4	proteasome activator subunit 4	187	0	0	0.5	1	1.073	0.238	0.669	FALSE	NA
55766	H2AFJ	H2A histone family member J	335	0	0	0	0	1.344	0.318	0.669	FALSE	NA
7157	TP53	tumor protein p53	451	0	0	0	0	1.928	0.45	0.669	FALSE	NA
8087	FXR1	FMR1 autosomal homolog 1	64	0	0	0.5	1	0.861	0.167	0.669	FALSE	NA
829	CAPZA1	capping actin protein of muscle Z-line subunit alpha 1	164	0	0	0.5	1	1.102	0.247	0.669	FALSE	NA
1075	CTSC	cathepsin C	157	0	0	0.5	1	1.045	0.23	0.667	FALSE	NA
55666	NPLOC4	NPL4 homolog, ubiquitin recognition factor	30	0.5	0	0	1	0.77	0.136	0.667	FALSE	NA
56261	GPCPD1	glycerophosphocholine phosphodiesterase 1	13	0	0	0.5	1	0.73	0.122	0.667	FALSE	NA
8417	STX7	syntaxin 7	33	0	0	1	1	0.739	0.125	0.667	FALSE	NA
1388	ATF6B	activating transcription factor 6 beta	13	0	0.5	0.5	2	0.583	0.072	0.666	FALSE	NA
7979	SEM1	SEM1 26S proteasome complex subunit	198	0	0	0.5	1	1.1	0.248	0.666	FALSE	NA
10594	PRPF8	pre-mRNA processing factor 8	221	0	0	0.5	1	1.086	0.244	0.665	FALSE	NA
11168	PSIP1	PC4 and SFRS1 interacting protein 1	4	0	0	1	1	0.453	0.034	0.665	FALSE	NA
3187	HNRNPH1	heterogeneous nuclear ribonucleoprotein H1	205	0	0	0.5	1	1.066	0.238	0.665	FALSE	NA
4017	LOXL2	lysyl oxidase like 2	12	0	1	0	1	0.573	0.069	0.665	FALSE	NA
5880	RAC2	Rac family small GTPase 2	216	0	0	0	0	1.325	0.315	0.665	FALSE	NA
6767	ST13	ST13 Hsp70 interacting protein	17	0.5	0	1	2	0.606	0.08	0.665	FALSE	NA
2241	FER	FER tyrosine kinase	18	0	0	0.5	1	0.625	0.087	0.663	FALSE	NA
23376	UFL1	UFM1 specific ligase 1	258	0	0	0.5	1	1.008	0.22	0.663	FALSE	NA
55031	USP47	ubiquitin specific peptidase 47	28	0	0	1	1	0.625	0.087	0.663	FALSE	NA
6667	SP1	Sp1 transcription factor	173	0	0	0.5	1	1.173	0.272	0.663	FALSE	NA
10817	FRS3	fibroblast growth factor receptor substrate 3	39	0	0.5	0	1	0.778	0.141	0.662	FALSE	NA
29116	MYLIP	myosin regulatory light chain interacting protein	258	0	0	0.5	1	1.001	0.218	0.662	FALSE	NA
9410	SNRNP40	small nuclear ribonucleoprotein U5 subunit 40	219	0	0	0.5	1	1.065	0.239	0.662	FALSE	NA
4660	PPP1R12B	protein phosphatase 1 regulatory subunit 12B	29	0	0	0.5	1	0.71	0.117	0.661	FALSE	NA
1213	CLTC	clathrin heavy chain	189	0	0	0.5	1	1.122	0.258	0.66	FALSE	NA
155038	GIMAP8	GTPase, IMAP family member 8	6	0	0.5	0.5	2	0.634	0.091	0.66	FALSE	NA
5236	PGM1	phosphoglucomutase 1	96	0	0	1	1	1.058	0.238	0.66	FALSE	NA
8546	AP3B1	adaptor related protein complex 3 subunit beta 1	117	0	0	0.5	1	1.01	0.222	0.66	FALSE	NA
22937	SCAP	SREBF chaperone	11	0	0.5	0	1	0.52	0.054	0.659	FALSE	NA
51465	UBE2J1	ubiquitin conjugating enzyme E2 J1	259	0	0	0.5	1	1.005	0.221	0.659	FALSE	NA
58512	DLGAP3	DLG associated protein 3	22	0	0	0	0	0.656	0.099	0.659	FALSE	NA
88	ACTN2	actinin alpha 2	154	0.5	0	0	1	1.155	0.269	0.659	FALSE	NA
9046	DOK2	docking protein 2	30	0	0.5	0	1	0.722	0.122	0.659	FALSE	NA
55636	CHD7	chromodomain helicase DNA binding protein 7	3	1	0.5	0	2	0.377	0.018	0.658	FALSE	NA
9491	PSMF1	proteasome inhibitor subunit 1	199	0	0	0.5	1	1.101	0.253	0.657	FALSE	NA
11051	NUDT21	nudix hydrolase 21	200	0	0	0.5	1	1.025	0.229	0.656	FALSE	NA
170302	ARX	aristaless related homeobox	3	1	0	0	1	0.613	0.085	0.656	FALSE	NA
3141	HLCS	holocarboxylase synthetase	8	0	0.5	0	1	0.524	0.056	0.656	FALSE	NA
4005	LMO2	LIM domain only 2	17	0	0	0.5	1	0.621	0.088	0.656	FALSE	NA
5566	PRKACA	protein kinase cAMP-activated catalytic subunit alpha	336	0	0	0	0	1.482	0.361	0.656	FALSE	NA
6477	SIAH1	siah E3 ubiquitin protein ligase 1	273	0	0	0.5	1	1.065	0.242	0.656	FALSE	NA
1741	DLG3	discs large MAGUK scaffold protein 3	45	0	0	0	0	0.856	0.172	0.655	FALSE	NA
2002	ELK1	ETS transcription factor ELK1	19	0.5	0	0	1	0.645	0.097	0.654	FALSE	NA
2801	GOLGA2	golgin A2	124	0	0	0.5	1	0.976	0.214	0.654	FALSE	NA
5361	PLXNA1	plexin A1	33	0	0	0.5	1	0.752	0.135	0.654	FALSE	NA
55739	NAXD	NAD(P)HX dehydratase	5	0.5	1	0	2	0.453	0.036	0.654	FALSE	NA
79035	NABP2	nucleic acid binding protein 2	76	0.5	0	0	1	0.86	0.174	0.653	FALSE	NA
9972	NUP153	nucleoporin 153	156	0	0	0.5	1	0.999	0.222	0.653	FALSE	NA
3683	ITGAL	integrin subunit alpha L	129	0	0	0.5	1	1.016	0.228	0.652	FALSE	NA
63893	UBE2O	ubiquitin conjugating enzyme E2 O	258	0	0	0.5	1	1.031	0.233	0.652	FALSE	NA
9440	MED17	mediator complex subunit 17	72	0	0	0.5	1	0.864	0.176	0.652	FALSE	NA
3482	IGF2R	insulin like growth factor 2 receptor	171	0	0	0.5	1	1.096	0.255	0.651	FALSE	NA
586	BCAT1	branched chain amino acid transaminase 1	12	0	1	0	1	0.582	0.076	0.651	FALSE	NA
7187	TRAF3	TNF receptor associated factor 3	105	0	0.5	0	1	0.984	0.218	0.651	FALSE	NA
6426	SRSF1	serine and arginine rich splicing factor 1	245	0	0	0.5	1	1.118	0.262	0.65	FALSE	NA
83992	CTTNBP2	cortactin binding protein 2	25	1	0	0	1	0.687	0.113	0.65	FALSE	NA
4791	NFKB2	nuclear factor kappa B subunit 2	101	0.5	0	0	1	0.968	0.214	0.648	FALSE	NA
5931	RBBP7	RB binding protein 7, chromatin remodeling factor	306	0	0	0	0	1.271	0.309	0.648	FALSE	NA
5978	REST	RE1 silencing transcription factor	64	0.5	0	0	1	0.85	0.173	0.648	FALSE	NA
255488	RNF144B	ring finger protein 144B	256	0	0	0.5	1	0.993	0.223	0.647	FALSE	NA
56894	AGPAT3	1-acylglycerol-3-phosphate O-acyltransferase 3	25	0	0.5	0.5	2	0.725	0.128	0.647	FALSE	NA
10291	SF3A1	splicing factor 3a subunit 1	193	0	0	0.5	1	1.027	0.235	0.646	FALSE	NA
10959	TMED2	transmembrane p24 trafficking protein 2	185	0	0	0.5	1	1.085	0.254	0.646	FALSE	NA
8175	SF3A2	splicing factor 3a subunit 2	230	0	0	0.5	1	1.172	0.281	0.646	FALSE	NA
79961	DENND2D	DENN domain containing 2D	6	0	0.5	0.5	2	0.454	0.038	0.645	FALSE	NA
8174	MADCAM1	mucosal vascular addressin cell adhesion molecule 1	4	0	1	0	1	0.453	0.038	0.644	FALSE	NA
8468	FKBP6	FKBP prolyl isomerase 6	62	0.5	0	0	1	0.865	0.18	0.644	FALSE	NA
93100	NAPRT	nicotinate phosphoribosyltransferase	103	0.5	0	0	1	0.982	0.221	0.644	FALSE	NA
9749	PHACTR2	phosphatase and actin regulator 2	3	0	1	0.5	2	0.402	0.025	0.644	FALSE	NA
10562	OLFM4	olfactomedin 4	85	0.5	0	0	1	0.928	0.203	0.643	FALSE	NA
51256	TBC1D7	TBC1 domain family member 7	17	0	0	0.5	1	0.601	0.085	0.643	FALSE	NA
8178	ELL	elongation factor for RNA polymerase II	136	0	0.5	0	1	0.998	0.227	0.643	FALSE	NA
26270	FBXO6	F-box protein 6	309	0	0	0.5	1	1.066	0.25	0.642	FALSE	NA
23136	EPB41L3	erythrocyte membrane protein band 4.1 like 3	13	0	0	0	0	0.579	0.078	0.641	FALSE	NA
5133	PDCD1	programmed cell death 1	19	0.5	0	0	1	0.618	0.092	0.641	FALSE	NA
10694	CCT8	chaperonin containing TCP1 subunit 8	253	0	0	0.5	1	1.314	0.326	0.64	FALSE	NA
389	RHOC	ras homolog family member C	187	0	0	0	0	1.255	0.309	0.64	FALSE	NA
83666	PARP9	poly(ADP-ribose) polymerase family member 9	6	0	0.5	1	2	0.45	0.038	0.64	FALSE	NA
3660	IRF2	interferon regulatory factor 2	125	0	0	0.5	1	1.016	0.235	0.639	FALSE	NA
84527	ZNF559	zinc finger protein 559	1	0.5	0	0.5	2	0.881	0.188	0.639	FALSE	NA
10417	SPON2	spondin 2	39	0	0	1	1	0.774	0.15	0.638	FALSE	NA
3665	IRF7	interferon regulatory factor 7	160	0	0	0.5	1	1.123	0.27	0.638	FALSE	NA
51729	WBP11	WW domain binding protein 11	178	0	0	0.5	1	0.982	0.224	0.638	FALSE	NA
170960	ZNF721	zinc finger protein 721	1	0	0.5	0.5	2	0.937	0.209	0.637	FALSE	NA
27252	KLHL20	kelch like family member 20	296	0	0	0.5	1	1.033	0.242	0.637	FALSE	NA
9716	AQR	aquarius intron-binding spliceosomal factor	240	0	0	0.5	1	1.114	0.268	0.637	FALSE	NA
11010	GLIPR1	GLI pathogenesis related 1	69	0	0	0.5	1	0.841	0.175	0.636	FALSE	NA
10010	TANK	TRAF family member associated NFKB activator	43	0	0	1	1	0.814	0.166	0.635	FALSE	NA
2560	GABRB1	gamma-aminobutyric acid type A receptor beta1 subunit	15	0	0	0	0	0.612	0.092	0.635	FALSE	NA
3184	HNRNPD	heterogeneous nuclear ribonucleoprotein D	193	0	0	0.5	1	1.042	0.246	0.635	FALSE	NA
8668	EIF3I	eukaryotic translation initiation factor 3 subunit I	150	0	0.5	0	1	0.971	0.222	0.635	FALSE	NA
9439	MED23	mediator complex subunit 23	62	0	0	0.5	1	0.822	0.169	0.635	FALSE	NA
10645	CAMKK2	calcium/calmodulin dependent protein kinase kinase 2	18	0.5	0	0	1	0.609	0.091	0.634	FALSE	NA
6049	RNF6	ring finger protein 6	256	0	0	0.5	1	0.993	0.23	0.634	FALSE	NA
24144	TFIP11	tuftelin interacting protein 11	163	0	0	0.5	1	0.951	0.216	0.633	FALSE	NA
5603	MAPK13	mitogen-activated protein kinase 13	73	0	0	0.5	1	0.894	0.196	0.633	FALSE	NA
124975	GGT6	gamma-glutamyltransferase 6	20	0	1	0	1	0.657	0.109	0.632	FALSE	NA
64409	GALNT17	polypeptide N-acetylgalactosaminyltransferase 17	16	0.5	0.5	0	2	0.601	0.089	0.632	FALSE	NA
84725	PLEKHA8	pleckstrin homology domain containing A8	1	0.5	0	0	1	0.438	0.036	0.632	FALSE	NA
863	CBFA2T3	CBFA2/RUNX1 translocation partner 3	6	0	0.5	0	1	0.469	0.045	0.632	FALSE	NA
7343	UBTF	upstream binding transcription factor	69	0	0.5	0	1	0.83	0.174	0.631	FALSE	NA
3679	ITGA7	integrin subunit alpha 7	18	0.5	0	0	1	0.614	0.094	0.63	FALSE	NA
5495	PPM1B	protein phosphatase, Mg2+/Mn2+ dependent 1B	28	0	0	1	1	0.66	0.111	0.63	FALSE	NA
275	AMT	aminomethyltransferase	29	1	0	0	1	0.734	0.139	0.629	FALSE	NA
5045	FURIN	furin, paired basic amino acid cleaving enzyme	37	0	0.5	0	1	0.774	0.154	0.629	FALSE	NA
6431	SRSF6	serine and arginine rich splicing factor 6	233	0	0	0.5	1	1.059	0.255	0.628	FALSE	NA
10956	OS9	OS9 endoplasmic reticulum lectin	38	0.5	0	0	1	0.787	0.16	0.627	FALSE	NA
114907	FBXO32	F-box protein 32	300	0	0	0.5	1	1.048	0.252	0.627	FALSE	NA
3066	HDAC2	histone deacetylase 2	209	0	0	0	0	1.226	0.308	0.627	FALSE	NA
10949	HNRNPA0	heterogeneous nuclear ribonucleoprotein A0	185	0	0	0.5	1	0.987	0.232	0.626	FALSE	NA
9953	HS3ST3B1	heparan sulfate-glucosamine 3-sulfotransferase 3B1	13	0	0.5	0.5	2	0.539	0.069	0.626	FALSE	NA
51585	PCF11	PCF11 cleavage and polyadenylation factor subunit	245	0	0	0.5	1	1.099	0.27	0.625	FALSE	NA
6938	TCF12	transcription factor 12	36	0	0	0	0	0.774	0.156	0.625	FALSE	NA
55559	HAUS7	HAUS augmin like complex subunit 7	114	0	0	0.5	1	0.892	0.2	0.623	FALSE	NA
55568	GALNT10	polypeptide N-acetylgalactosaminyltransferase 10	16	0.5	0.5	0	2	0.601	0.092	0.623	FALSE	NA
6455	SH3GL1	SH3 domain containing GRB2 like 1, endophilin A2	134	0	0	0.5	1	0.975	0.23	0.622	FALSE	NA
5444	PON1	paraoxonase 1	27	1	0	0	1	0.677	0.121	0.621	FALSE	NA
5826	ABCD4	ATP binding cassette subfamily D member 4	18	0	0	0.5	1	0.639	0.107	0.621	FALSE	NA
60685	ZFAND3	zinc finger AN1-type containing 3	2	0	0.5	0.5	2	0.549	0.074	0.621	FALSE	NA
118	ADD1	adducin 1	9	0.5	0	0.5	2	0.582	0.086	0.62	FALSE	NA
4001	LMNB1	lamin B1	92	0	0	0.5	1	0.924	0.213	0.62	FALSE	NA
50614	GALNT9	polypeptide N-acetylgalactosaminyltransferase 9	16	0.5	0.5	0	2	0.601	0.093	0.62	FALSE	NA
118429	ANTXR2	ANTXR cell adhesion molecule 2	2	0	0.5	0.5	2	0.45	0.042	0.619	FALSE	NA
6839	SUV39H1	suppressor of variegation 3-9 homolog 1	51	0.5	0	0	1	0.772	0.158	0.619	FALSE	NA
9371	KIF3B	kinesin family member 3B	149	0	0.5	0	1	1.016	0.246	0.619	FALSE	NA
10672	GNA13	G protein subunit alpha 13	96	0	0	0.5	1	0.917	0.212	0.618	FALSE	NA
8925	HERC1	HECT and RLD domain containing E3 ubiquitin protein ligase family member 1	257	0	0	0.5	1	0.994	0.239	0.618	FALSE	NA
55142	HAUS2	HAUS augmin like complex subunit 2	115	0	0	0.5	1	0.905	0.208	0.617	FALSE	NA
8636	SSNA1	SS nuclear autoantigen 1	114	0	0	0.5	1	0.892	0.203	0.617	FALSE	NA
89122	TRIM4	tripartite motif containing 4	256	0	0	0.5	1	0.993	0.239	0.617	FALSE	NA
1139	CHRNA7	cholinergic receptor nicotinic alpha 7 subunit	13	1	0	0	1	0.598	0.093	0.616	FALSE	NA
23304	UBR2	ubiquitin protein ligase E3 component n-recognin 2	256	0	0	0.5	1	0.993	0.24	0.616	FALSE	NA
9656	MDC1	mediator of DNA damage checkpoint 1	125	0	0	0.5	1	1.081	0.269	0.616	FALSE	NA
4656	MYOG	myogenin	15	0	0	0	0	0.615	0.1	0.615	FALSE	NA
50808	AK3	adenylate kinase 3	69	0	0	0.5	1	0.944	0.223	0.615	FALSE	NA
53615	MBD3	methyl-CpG binding domain protein 3	123	0	0	0.5	1	0.987	0.238	0.615	FALSE	NA
348235	SKA2	spindle and kinetochore associated complex subunit 2	106	0	0	0.5	1	0.911	0.212	0.614	FALSE	NA
3512	JCHAIN	joining chain of multimeric IgA and IgM	5	0	1	0	1	0.421	0.035	0.614	FALSE	NA
26003	GORASP2	golgi reassembly stacking protein 2	10	0	0.5	0	1	0.516	0.065	0.613	FALSE	NA
60	ACTB	actin beta	259	0	0	0	0	1.306	0.339	0.613	FALSE	NA
6143	RPL19	ribosomal protein L19	241	0.5	0	0	1	1.091	0.274	0.613	FALSE	NA
80306	MED28	mediator complex subunit 28	65	0	0	0.5	1	0.813	0.176	0.613	FALSE	NA
8645	KCNK5	potassium two pore domain channel subfamily K member 5	8	0	0	0	0	0.513	0.064	0.613	FALSE	NA
8661	EIF3A	eukaryotic translation initiation factor 3 subunit A	144	0	0	1	1	1.003	0.245	0.613	FALSE	NA
10477	UBE2E3	ubiquitin conjugating enzyme E2 E3	261	0	0	0.5	1	1.019	0.251	0.612	FALSE	NA
23014	FBXO21	F-box protein 21	296	0	0	0.5	1	1.031	0.255	0.612	FALSE	NA
30844	EHD4	EH domain containing 4	10	0	0	1	1	0.55	0.077	0.612	FALSE	NA
9815	GIT2	GIT ArfGAP 2	43	0	0	0.5	1	0.754	0.154	0.612	FALSE	NA
22907	DHX30	DExH-box helicase 30	2	1	0	0	1	0.34	0.016	0.611	FALSE	NA
2674	GFRA1	GDNF family receptor alpha 1	57	0	0	0.5	1	0.845	0.189	0.611	FALSE	NA
9039	UBA3	ubiquitin like modifier activating enzyme 3	315	0	0	0.5	1	1.071	0.269	0.611	FALSE	NA
255967	PAN3	poly(A) specific ribonuclease subunit PAN3	10	0	0	1	1	0.505	0.062	0.61	FALSE	NA
2690	GHR	growth hormone receptor	31	0.5	0	0	1	0.714	0.14	0.61	FALSE	NA
326624	RAB37	RAB37, member RAS oncogene family	189	0	0	0.5	1	1.113	0.283	0.61	FALSE	NA
55339	WDR33	WD repeat domain 33	224	0	0	0.5	1	1.048	0.262	0.61	FALSE	NA
5791	PTPRE	protein tyrosine phosphatase receptor type E	8	0	0	1	1	0.487	0.056	0.61	FALSE	NA
9037	SEMA5A	semaphorin 5A	38	1	0	0	1	0.777	0.164	0.61	FALSE	NA
8085	KMT2D	lysine methyltransferase 2D	125	0	0	0	0	0.957	0.231	0.609	FALSE	NA
10489	LRRC41	leucine rich repeat containing 41	296	0	0	0.5	1	1.031	0.257	0.608	FALSE	NA
1665	DHX15	DEAH-box helicase 15	286	0	0	0.5	1	1.121	0.287	0.608	FALSE	NA
285220	EPHA6	EPH receptor A6	35	0.5	0	0	1	0.72	0.143	0.608	FALSE	NA
6634	SNRPD3	small nuclear ribonucleoprotein D3 polypeptide	281	0	0	0.5	1	1.133	0.291	0.607	FALSE	NA
89890	KBTBD6	kelch repeat and BTB domain containing 6	295	0	0	0.5	1	1.031	0.258	0.607	FALSE	NA
10018	BCL2L11	BCL2 like 11	83	0	0	0.5	1	0.899	0.212	0.606	FALSE	NA
1106	CHD2	chromodomain helicase DNA binding protein 2	1	1	0	0	1	0.382	0.026	0.606	FALSE	NA
3815	KIT	KIT proto-oncogene, receptor tyrosine kinase	63	0	0	0.5	1	0.864	0.199	0.606	FALSE	NA
4735	SEPT2	septin 2	110	0	0	0.5	1	0.964	0.235	0.606	FALSE	NA
5966	REL	REL proto-oncogene, NF-kB subunit	69	0	0.5	0	1	0.79	0.171	0.606	FALSE	NA
64781	CERK	ceramide kinase	23	0.5	0	0.5	2	0.647	0.116	0.606	FALSE	NA
84254	CAMKK1	calcium/calmodulin dependent protein kinase kinase 1	6	0	0.5	0	1	0.45	0.045	0.606	FALSE	NA
9785	DHX38	DEAH-box helicase 38	228	0	0	0.5	1	1.051	0.265	0.606	FALSE	NA
7045	TGFBI	transforming growth factor beta induced	10	0	0	1	1	0.521	0.069	0.605	FALSE	NA
23350	U2SURP	U2 snRNP associated SURP domain containing	180	0	0	0.5	1	0.992	0.246	0.604	FALSE	NA
6714	SRC	SRC proto-oncogene, non-receptor tyrosine kinase	371	0	0	0	0	1.539	0.405	0.604	FALSE	NA
10286	BCAS2	BCAS2 pre-mRNA processing factor	196	0	0	0.5	1	1.004	0.251	0.603	FALSE	NA
26052	DNM3	dynamin 3	139	0	0	0.5	1	0.982	0.243	0.603	FALSE	NA
55802	DCP1A	decapping mRNA 1A	152	0	0	0.5	1	0.979	0.242	0.603	FALSE	NA
8239	USP9X	ubiquitin specific peptidase 9 X-linked	44	0	0	1	1	0.773	0.166	0.603	FALSE	NA
7150	TOP1	DNA topoisomerase I	14	0.5	0	0	1	0.538	0.076	0.602	FALSE	NA
10283	CWC27	CWC27 spliceosome associated protein homolog	175	0	0	0.5	1	0.983	0.245	0.601	FALSE	NA
154881	KCTD7	potassium channel tetramerization domain containing 7	295	0	0	0.5	1	1.031	0.261	0.601	FALSE	NA
993	CDC25A	cell division cycle 25A	112	0.5	0	0	1	0.958	0.236	0.601	FALSE	NA
3799	KIF5B	kinesin family member 5B	135	0	0	0.5	1	0.968	0.24	0.6	FALSE	NA
83938	LRMDA	leucine rich melanocyte differentiation associated	74	0	0.5	0	1	0.777	0.17	0.598	FALSE	NA
9867	PJA2	praja ring finger ubiquitin ligase 2	256	0	0	0.5	1	0.993	0.25	0.598	FALSE	NA
100423062	IGLL5	immunoglobulin lambda like polypeptide 5	100	0	0	0	0	0.941	0.232	0.597	FALSE	NA
2516	NR5A1	nuclear receptor subfamily 5 group A member 1	11	0	0.5	0	1	0.531	0.075	0.597	FALSE	NA
25793	FBXO7	F-box protein 7	306	0	0	0.5	1	1.056	0.272	0.597	FALSE	NA
3188	HNRNPH2	heterogeneous nuclear ribonucleoprotein H2	180	0	0	0.5	1	0.98	0.246	0.597	FALSE	NA
3749	KCNC4	potassium voltage-gated channel subfamily C member 4	4	0	1	0	1	0.462	0.051	0.597	FALSE	NA
64718	UNKL	unk like zinc finger	258	0	0	0.5	1	1.012	0.257	0.597	FALSE	NA
683	BST1	bone marrow stromal cell antigen 1	170	0	0	0.5	1	1.073	0.278	0.597	FALSE	NA
8036	SHOC2	SHOC2 leucine rich repeat scaffold protein	38	0	0.5	0	1	0.727	0.151	0.597	FALSE	NA
8660	IRS2	insulin receptor substrate 2	77	0	0	0.5	1	0.881	0.21	0.597	FALSE	NA
11339	OIP5	Opa interacting protein 5	117	0	0.5	0	1	0.939	0.232	0.596	FALSE	NA
1390	CREM	cAMP responsive element modulator	27	0	0	0.5	1	0.683	0.134	0.596	FALSE	NA
1767	DNAH5	dynein axonemal heavy chain 5	32	0.5	0	0	1	0.665	0.127	0.596	FALSE	NA
4849	CNOT3	CCR4-NOT transcription complex subunit 3	28	1	0	0	1	0.681	0.133	0.596	FALSE	NA
23032	USP33	ubiquitin specific peptidase 33	14	0.5	0	0.5	2	0.656	0.124	0.595	FALSE	NA
6886	TAL1	TAL bHLH transcription factor 1, erythroid differentiation factor	15	0	0	0.5	1	0.558	0.086	0.595	FALSE	NA
162	AP1B1	adaptor related protein complex 1 subunit beta 1	93	0	0	0.5	1	0.881	0.212	0.594	FALSE	NA
4893	NRAS	NRAS proto-oncogene, GTPase	343	0	0	0	0	1.441	0.387	0.594	FALSE	NA
558	AXL	AXL receptor tyrosine kinase	20	0.5	0	0	1	0.614	0.108	0.594	FALSE	NA
3977	LIFR	LIF receptor alpha	16	0	0	0.5	1	0.582	0.096	0.593	FALSE	NA
11033	ADAP1	ArfGAP with dual PH domains 1	2	0	1	0	1	0.353	0.021	0.592	FALSE	NA
383	ARG1	arginase 1	150	0	0	0.5	1	1.036	0.268	0.592	FALSE	NA
51639	SF3B6	splicing factor 3b subunit 6	192	0	0	0.5	1	0.989	0.252	0.592	FALSE	NA
55740	ENAH	ENAH actin regulator	20	0	0.5	0	1	0.663	0.128	0.592	FALSE	NA
6195	RPS6KA1	ribosomal protein S6 kinase A1	35	0	0	0.5	1	0.701	0.143	0.592	FALSE	NA
56006	SMG9	SMG9 nonsense mediated mRNA decay factor	113	0	0.5	0	1	0.883	0.214	0.591	FALSE	NA
7923	HSD17B8	hydroxysteroid 17-beta dehydrogenase 8	25	0	1	0	1	0.714	0.149	0.591	FALSE	NA
467	ATF3	activating transcription factor 3	12	0	0.5	0	1	0.535	0.079	0.59	FALSE	NA
9657	IQCB1	IQ motif containing B1	96	0	0	0.5	1	0.86	0.206	0.59	FALSE	NA
10848	PPP1R13L	protein phosphatase 1 regulatory subunit 13 like	3	0	1	0	1	0.401	0.034	0.589	FALSE	NA
339287	MSL1	MSL complex subunit 1	33	0	0	0.5	1	0.672	0.133	0.589	FALSE	NA
5265	SERPINA1	serpin family A member 1	224	0	0	0.5	1	1.099	0.291	0.589	FALSE	NA
5588	PRKCQ	protein kinase C theta	98	0	0	0.5	1	0.912	0.226	0.589	FALSE	NA
115426	UHRF2	ubiquitin like with PHD and ring finger domains 2	4	0	0	0.5	1	0.449	0.049	0.588	FALSE	NA
23603	CORO1C	coronin 1C	7	0	0	0.5	1	0.487	0.062	0.588	FALSE	NA
51493	RTCB	RNA 2',3'-cyclic phosphate and 5'-OH ligase	8	0	0	0.5	1	0.562	0.09	0.588	FALSE	NA
57703	CWC22	CWC22 spliceosome associated protein homolog	192	0	0	0.5	1	0.992	0.256	0.587	FALSE	NA
10671	DCTN6	dynactin subunit 6	154	0	0	0.5	1	0.994	0.257	0.586	FALSE	NA
79796	ALG9	ALG9 alpha-1,2-mannosyltransferase	3	0	0.5	0	1	0.499	0.067	0.586	FALSE	NA
898	CCNE1	cyclin E1	124	0.5	0	0	1	0.982	0.253	0.586	FALSE	NA
5906	RAP1A	RAP1A, member of RAS oncogene family	241	0	0	0	0	1.242	0.338	0.585	FALSE	NA
1649	DDIT3	DNA damage inducible transcript 3	15	0.5	0	0	1	0.571	0.095	0.584	FALSE	NA
246778	IL27	interleukin 27	13	0	0	0.5	1	0.556	0.089	0.584	FALSE	NA
25949	SYF2	SYF2 pre-mRNA splicing factor	176	0	0	0.5	1	0.974	0.251	0.584	FALSE	NA
80254	CEP63	centrosomal protein 63	114	0	0	0.5	1	0.892	0.222	0.583	FALSE	NA
10762	NUP50	nucleoporin 50	140	0	0	0.5	1	0.925	0.235	0.582	FALSE	NA
50943	FOXP3	forkhead box P3	16	0	0	0	0	0.615	0.113	0.582	FALSE	NA
5993	RFX5	regulatory factor X5	5	0	0.5	0	1	0.413	0.039	0.582	FALSE	NA
11021	RAB35	RAB35, member RAS oncogene family	76	0	0.5	0	1	0.872	0.216	0.58	FALSE	NA
27043	PELP1	proline, glutamate and leucine rich protein 1	172	0	0	0.5	1	0.965	0.251	0.58	FALSE	NA
376267	RAB15	RAB15, member RAS oncogene family	63	0	0.5	0	1	0.792	0.185	0.58	FALSE	NA
5058	PAK1	p21 (RAC1) activated kinase 1	154	0	0	0	0	1.075	0.289	0.58	FALSE	NA
728642	CDK11A	cyclin dependent kinase 11A	76	0	0	0.5	1	0.807	0.191	0.58	FALSE	NA
8467	SMARCA5	SWI/SNF related, matrix associated, actin dependent regulator of chromatin, subfamily a, member 5	108	0	0	0.5	1	0.928	0.237	0.58	FALSE	NA
9044	BTAF1	B-TFIID TATA-box binding protein associated factor 1	6	1	0	0	1	0.472	0.059	0.58	FALSE	NA
1174	AP1S1	adaptor related protein complex 1 subunit sigma 1	119	0	0	0.5	1	0.951	0.246	0.579	FALSE	NA
83640	RAMAC	RNA guanine-7 methyltransferase activating subunit	11	0	0.5	0	1	0.506	0.072	0.578	FALSE	NA
3651	PDX1	pancreatic and duodenal homeobox 1	13	0	0	0.5	1	0.572	0.098	0.577	FALSE	NA
51111	KMT5B	lysine methyltransferase 5B	1	1	0	0.5	2	0.389	0.033	0.577	FALSE	NA
57405	SPC25	SPC25 component of NDC80 kinetochore complex	123	0	0	0.5	1	0.928	0.239	0.577	FALSE	NA
27067	STAU2	staufen double-stranded RNA binding protein 2	5	0	1	0	1	0.409	0.039	0.576	FALSE	NA
57097	PARP11	poly(ADP-ribose) polymerase family member 11	2	0.5	1	0	2	0.392	0.034	0.576	FALSE	NA
692312	PPAN-P2RY11	PPAN-P2RY11 readthrough	63	0	0.5	0	1	0.729	0.162	0.576	FALSE	NA
11113	CIT	citron rho-interacting serine/threonine kinase	18	0.5	0	0	1	0.589	0.106	0.574	FALSE	NA
1909	EDNRA	endothelin receptor type A	182	0	0.5	0	1	0.969	0.256	0.574	FALSE	NA
27246	RNF115	ring finger protein 115	258	0	0	0.5	1	0.995	0.265	0.574	FALSE	NA
55626	AMBRA1	autophagy and beclin 1 regulator 1	21	0	0.5	0	1	0.606	0.113	0.574	FALSE	NA
9456	HOMER1	homer scaffold protein 1	22	0	0	0	0	0.66	0.135	0.574	FALSE	NA
984	CDK11B	cyclin dependent kinase 11B	73	0	0	0.5	1	0.795	0.19	0.574	FALSE	NA
10658	CELF1	CUGBP Elav-like family member 1	4	0	1	0	1	0.373	0.029	0.573	FALSE	NA
3833	KIFC1	kinesin family member C1	106	0.5	0	0	1	0.876	0.222	0.573	FALSE	NA
51735	RAPGEF6	Rap guanine nucleotide exchange factor 6	7	0	0	0.5	1	0.486	0.066	0.573	FALSE	NA
55012	PPP2R3C	protein phosphatase 2 regulatory subunit B''gamma	6	0	1	0	1	0.444	0.051	0.573	FALSE	NA
9070	ASH2L	ASH2 like, histone lysine methyltransferase complex subunit	128	0	0	0	0	0.944	0.247	0.573	FALSE	NA
2997	GYS1	glycogen synthase 1	21	0.5	0	0	1	0.682	0.145	0.572	FALSE	NA
9319	TRIP13	thyroid hormone receptor interactor 13	66	0	0.5	0	1	0.788	0.188	0.572	FALSE	NA
5170	PDPK1	3-phosphoinositide dependent protein kinase 1	110	0	0	0.5	1	0.968	0.257	0.571	FALSE	NA
84289	ING5	inhibitor of growth family member 5	27	0	0	0.5	1	0.68	0.145	0.571	FALSE	NA
10870	HCST	hematopoietic cell signal transducer	15	0	0	1	1	0.621	0.121	0.57	FALSE	NA
50650	ARHGEF3	Rho guanine nucleotide exchange factor 3	19	0	0	1	1	0.609	0.116	0.57	FALSE	NA
5305	PIP4K2A	phosphatidylinositol-5-phosphate 4-kinase type 2 alpha	29	0	0	0.5	1	0.663	0.138	0.57	FALSE	NA
11091	WDR5	WD repeat domain 5	221	0	0	0	0	1.109	0.307	0.569	FALSE	NA
5802	PTPRS	protein tyrosine phosphatase receptor type S	13	0	1	0	1	0.564	0.098	0.568	FALSE	NA
5860	QDPR	quinoid dihydropteridine reductase	12	0	0.5	0.5	2	0.53	0.085	0.568	FALSE	NA
5025	P2RX4	purinergic receptor P2X 4	6	0.5	0	0	1	0.504	0.075	0.567	FALSE	NA
6596	HLTF	helicase like transcription factor	13	0	0.5	0	1	0.604	0.115	0.567	FALSE	NA
5468	PPARG	peroxisome proliferator activated receptor gamma	130	0	0	0	0	1.003	0.273	0.566	FALSE	NA
55119	PRPF38B	pre-mRNA processing factor 38B	9	0	0	0.5	1	0.449	0.055	0.566	FALSE	NA
57418	WDR18	WD repeat domain 18	187	0	0.5	0	1	0.963	0.258	0.566	FALSE	NA
10499	NCOA2	nuclear receptor coactivator 2	144	0	0	0	0	1.05	0.29	0.565	FALSE	NA
149371	EXOC8	exocyst complex component 8	40	0	0	0.5	1	0.739	0.172	0.565	FALSE	NA
1912	PHC2	polyhomeotic homolog 2	123	0	0	0.5	1	0.923	0.244	0.565	FALSE	NA
23246	BOP1	BOP1 ribosomal biogenesis factor	244	0	0.5	0	1	1.068	0.296	0.565	FALSE	NA
10427	SEC24B	SEC24 homolog B, COPII coat complex component	113	0	0	0.5	1	0.915	0.242	0.564	FALSE	NA
7529	YWHAB	tyrosine 3-monooxygenase/tryptophan 5-monooxygenase activation protein beta	174	0	0	0	0	1.111	0.311	0.564	FALSE	NA
961	CD47	CD47 molecule	132	0	0	0.5	1	0.954	0.256	0.564	FALSE	NA
5922	RASA2	RAS p21 protein activator 2	20	0	0	0.5	1	0.575	0.105	0.563	FALSE	NA
84246	MED10	mediator complex subunit 10	74	0	0	0.5	1	0.817	0.205	0.562	FALSE	NA
113246	C12orf57	chromosome 12 open reading frame 57	2	1	0	0	1	0.342	0.023	0.561	FALSE	NA
1740	DLG2	discs large MAGUK scaffold protein 2	36	0	0	0	0	0.731	0.171	0.561	FALSE	NA
23360	FNBP4	formin binding protein 4	2	0.5	0	0	1	0.361	0.028	0.561	FALSE	NA
5568	PRKACG	protein kinase cAMP-activated catalytic subunit gamma	209	0	0	0	0	1.274	0.363	0.561	FALSE	NA
8828	NRP2	neuropilin 2	12	0	0.5	0	1	0.494	0.073	0.561	FALSE	NA
26290	GALNT8	polypeptide N-acetylgalactosaminyltransferase 8	16	1	0	0	1	0.574	0.106	0.56	FALSE	NA
51035	UBXN1	UBX domain protein 1	32	0	0.5	0	1	0.711	0.163	0.56	FALSE	NA
2205	FCER1A	Fc fragment of IgE receptor Ia	40	0	0	0.5	1	0.71	0.163	0.559	FALSE	NA
9061	PAPSS1	3'-phosphoadenosine 5'-phosphosulfate synthase 1	67	0	0	0.5	1	0.848	0.219	0.559	FALSE	NA
92359	CRB3	crumbs cell polarity complex component 3	3	0	0	0	0	0.377	0.033	0.558	FALSE	NA
51562	MBIP	MAP3K12 binding inhibitory protein 1	32	0	0	0.5	1	0.649	0.139	0.557	FALSE	NA
8633	UNC5C	unc-5 netrin receptor C	10	0.5	0	0	1	0.5	0.077	0.557	FALSE	NA
9135	RABEP1	rabaptin, RAB GTPase binding effector protein 1	10	0	0.5	0	1	0.552	0.098	0.557	FALSE	NA
100101267	POM121C	POM121 transmembrane nucleoporin C	138	0	0	0.5	1	0.92	0.249	0.556	FALSE	NA
3575	IL7R	interleukin 7 receptor	133	0	0	0.5	1	0.947	0.259	0.556	FALSE	NA
57592	ZNF687	zinc finger protein 687	6	0	0.5	0	1	0.41	0.044	0.556	FALSE	NA
6928	HNF1B	HNF1 homeobox B	4	0	1	0	1	0.413	0.045	0.556	FALSE	NA
7314	UBB	ubiquitin B	1169	0	0	0	0	2.14	0.55	0.556	FALSE	NA
9412	MED21	mediator complex subunit 21	79	0	0	0.5	1	0.86	0.226	0.556	FALSE	NA
1004	CDH6	cadherin 6	20	0.5	0	0	1	0.579	0.11	0.555	FALSE	NA
11044	TENT4A	terminal nucleotidyltransferase 4A	58	0	0	0.5	1	0.766	0.189	0.555	FALSE	NA
22898	DENND3	DENN domain containing 3	6	0	0.5	0	1	0.412	0.045	0.555	FALSE	NA
7458	EIF4H	eukaryotic translation initiation factor 4H	118	0.5	0	0	1	0.869	0.23	0.555	FALSE	NA
7462	LAT2	linker for activation of T cells family member 2	19	0	0	0.5	1	0.584	0.112	0.555	FALSE	NA
1840	DTX1	deltex E3 ubiquitin ligase 1	20	0	0.5	0	1	0.66	0.145	0.554	FALSE	NA
3146	HMGB1	high mobility group box 1	74	0	0	0.5	1	0.87	0.231	0.554	FALSE	NA
9810	RNF40	ring finger protein 40	29	0	0.5	0	1	0.649	0.14	0.554	FALSE	NA
126432	RINL	Ras and Rab interactor like	7	0	0.5	0	1	0.436	0.054	0.553	FALSE	NA
118788	PIK3AP1	phosphoinositide-3-kinase adaptor protein 1	23	0	0	0.5	1	0.602	0.121	0.552	FALSE	NA
27165	GLS2	glutaminase 2	35	0.5	0	0	1	0.741	0.18	0.552	FALSE	NA
65078	RTN4R	reticulon 4 receptor	8	0.5	0	0	1	0.496	0.077	0.552	FALSE	NA
9443	MED7	mediator complex subunit 7	77	0	0	0.5	1	0.84	0.22	0.552	FALSE	NA
10514	MYBBP1A	MYB binding protein 1a	121	0.5	0	0	1	0.883	0.238	0.551	FALSE	NA
5586	PKN2	protein kinase N2	17	0	0	1	1	0.586	0.115	0.551	FALSE	NA
9265	CYTH3	cytohesin 3	13	0	0.5	0	1	0.563	0.105	0.551	FALSE	NA
10111	RAD50	RAD50 double strand break repair protein	153	0	0	0.5	1	1.055	0.301	0.55	FALSE	NA
11064	CNTRL	centriolin	122	0	0	0.5	1	0.91	0.249	0.55	FALSE	NA
6520	SLC3A2	solute carrier family 3 member 2	10	0	0	0	0	0.583	0.114	0.55	FALSE	NA
1794	DOCK2	dedicator of cytokinesis 2	76	0	0	0.5	1	0.815	0.212	0.549	FALSE	NA
6506	SLC1A2	solute carrier family 1 member 2	6	1	0	0	1	0.46	0.064	0.549	FALSE	NA
79611	ACSS3	acyl-CoA synthetase short chain family member 3	22	0	0.5	0	1	0.639	0.138	0.549	FALSE	NA
9344	TAOK2	TAO kinase 2	5	1	0	0	1	0.413	0.047	0.549	FALSE	NA
129401	NUP35	nucleoporin 35	137	0	0	0.5	1	0.919	0.253	0.548	FALSE	NA
2206	MS4A2	membrane spanning 4-domains A2	40	0	0	0.5	1	0.71	0.169	0.548	FALSE	NA
3663	IRF5	interferon regulatory factor 5	117	0	0	0.5	1	0.922	0.254	0.548	FALSE	NA
4609	MYC	MYC proto-oncogene, bHLH transcription factor	147	0	0	0	0	1.03	0.294	0.548	FALSE	NA
6328	SCN3A	sodium voltage-gated channel alpha subunit 3	23	0	0	0.5	1	0.626	0.133	0.548	FALSE	NA
9414	TJP2	tight junction protein 2	7	0.5	0	0.5	2	0.433	0.054	0.548	FALSE	NA
55749	CCAR1	cell division cycle and apoptosis regulator 1	183	0	0	0.5	1	0.979	0.276	0.547	FALSE	NA
10905	MAN1A2	mannosidase alpha class 1A member 2	26	0.5	0	0	1	0.593	0.12	0.546	FALSE	NA
4329	ALDH6A1	aldehyde dehydrogenase 6 family member A1	31	0	0.5	0	1	0.726	0.177	0.546	FALSE	NA
7416	VDAC1	voltage dependent anion channel 1	75	0.5	0	0	1	0.946	0.265	0.546	FALSE	NA
916	CD3E	CD3e molecule	74	0	0	0.5	1	0.831	0.22	0.546	FALSE	NA
1509	CTSD	cathepsin D	111	0	0	0.5	1	0.893	0.245	0.545	FALSE	NA
3717	JAK2	Janus kinase 2	230	0	0	0	0	1.262	0.37	0.545	FALSE	NA
3725	JUN	Jun proto-oncogene, AP-1 transcription factor subunit	280	0	0	0	0	1.329	0.389	0.545	FALSE	NA
953	ENTPD1	ectonucleoside triphosphate diphosphohydrolase 1	48	0	0	1	1	0.763	0.193	0.545	FALSE	NA
10675	CSPG5	chondroitin sulfate proteoglycan 5	42	0.5	0	0	1	0.761	0.193	0.544	FALSE	NA
11325	DDX42	DEAD-box helicase 42	184	0	0	0.5	1	0.97	0.275	0.544	FALSE	NA
4087	SMAD2	SMAD family member 2	135	0	0	0	0	1.052	0.304	0.544	FALSE	NA
5329	PLAUR	plasminogen activator, urokinase receptor	135	0	0	0.5	1	0.991	0.283	0.544	FALSE	NA
10891	PPARGC1A	PPARG coactivator 1 alpha	137	0	0	0	0	1.031	0.297	0.543	FALSE	NA
2060	EPS15	epidermal growth factor receptor pathway substrate 15	136	0	0	0.5	1	0.952	0.269	0.543	FALSE	NA
85021	REPS1	RALBP1 associated Eps domain containing 1	123	0	0	0.5	1	0.873	0.239	0.543	FALSE	NA
10802	SEC24A	SEC24 homolog A, COPII coat complex component	120	0	0	0.5	1	0.945	0.267	0.542	FALSE	NA
22926	ATF6	activating transcription factor 6	14	0	0	0.5	1	0.53	0.095	0.542	FALSE	NA
168537	GIMAP7	GTPase, IMAP family member 7	5	0	0	1	1	0.577	0.116	0.54	FALSE	NA
2566	GABRG2	gamma-aminobutyric acid type A receptor gamma2 subunit	14	0	0	0	0	0.553	0.106	0.539	FALSE	NA
84678	KDM2B	lysine demethylase 2B	41	0	1	0	1	0.661	0.153	0.539	FALSE	NA
23214	XPO6	exportin 6	9	0	0.5	0	1	0.488	0.079	0.538	FALSE	NA
4097	MAFG	MAF bZIP transcription factor G	10	0.5	0.5	0	2	0.493	0.081	0.538	FALSE	NA
10693	CCT6B	chaperonin containing TCP1 subunit 6B	88	0	0.5	0	1	0.851	0.234	0.537	FALSE	NA
11169	WDHD1	WD repeat and HMG-box DNA binding protein 1	61	0	0.5	0	1	0.764	0.198	0.537	FALSE	NA
657	BMPR1A	bone morphogenetic protein receptor type 1A	47	0	0.5	0	1	0.754	0.194	0.537	FALSE	NA
58155	PTBP2	polypyrimidine tract binding protein 2	20	0	0.5	1	2	0.548	0.105	0.536	FALSE	NA
6132	RPL8	ribosomal protein L8	275	0	0	0.5	1	1.051	0.309	0.536	FALSE	NA
2034	EPAS1	endothelial PAS domain protein 1	121	0	0	0.5	1	0.91	0.259	0.534	FALSE	NA
4683	NBN	nibrin	154	0	0	0.5	1	1.052	0.311	0.534	FALSE	NA
51816	ADA2	adenosine deaminase 2	89	0	0	0.5	1	0.815	0.221	0.534	FALSE	NA
27185	DISC1	DISC1 scaffold protein	1	1	0.5	0	2	0.363	0.034	0.533	FALSE	NA
3265	HRAS	HRas proto-oncogene, GTPase	343	0	0	0	0	1.453	0.43	0.533	FALSE	NA
57459	GATAD2B	GATA zinc finger domain containing 2B	97	0	0	0.5	1	0.855	0.238	0.533	FALSE	NA
51655	RASD1	ras related dexamethasone induced 1	5	0	0.5	0.5	2	0.406	0.049	0.532	FALSE	NA
7409	VAV1	vav guanine nucleotide exchange factor 1	145	0	0	0	0	1.021	0.301	0.532	FALSE	NA
10082	GPC6	glypican 6	58	0.5	0	0	1	0.806	0.219	0.531	FALSE	NA
1612	DAPK1	death associated protein kinase 1	11	0	0	1	1	0.517	0.094	0.531	FALSE	NA
25837	RAB26	RAB26, member RAS oncogene family	63	0.5	0	0	1	0.745	0.194	0.531	FALSE	NA
6500	SKP1	S-phase kinase associated protein 1	449	0	0	0	0	1.187	0.357	0.531	FALSE	NA
7203	CCT3	chaperonin containing TCP1 subunit 3	132	0	0	0.5	1	0.96	0.28	0.531	FALSE	NA
4927	NUP88	nucleoporin 88	141	0	0	0.5	1	0.924	0.267	0.53	FALSE	NA
9002	F2RL3	F2R like thrombin or trypsin receptor 3	164	0	0.5	0	1	0.878	0.249	0.53	FALSE	NA
7536	SF1	splicing factor 1	148	0	0	0.5	1	0.871	0.247	0.529	FALSE	NA
8445	DYRK2	dual specificity tyrosine phosphorylation regulated kinase 2	9	0	0	1	1	0.543	0.106	0.529	FALSE	NA
973	CD79A	CD79a molecule	46	0	0	0	0	0.722	0.185	0.529	FALSE	NA
23647	ARFIP2	ADP ribosylation factor interacting protein 2	9	0	0.5	0	1	0.535	0.103	0.528	FALSE	NA
55624	POMGNT1	protein O-linked mannose N-acetylglucosaminyltransferase 1 (beta 1,2-)	8	1	0	0	1	0.512	0.093	0.528	FALSE	NA
7481	WNT11	Wnt family member 11	64	0.5	0	0	1	0.781	0.211	0.528	FALSE	NA
23658	LSM5	LSM5 homolog, U6 small nuclear RNA and mRNA degradation associated	198	0	0	0.5	1	0.98	0.29	0.527	FALSE	NA
28996	HIPK2	homeodomain interacting protein kinase 2	18	0	0	0.5	1	0.575	0.121	0.527	FALSE	NA
8202	NCOA3	nuclear receptor coactivator 3	186	0	0	0	0	1.039	0.311	0.527	FALSE	NA
83940	TATDN1	TatD DNase domain containing 1	8	0	0.5	0.5	2	0.454	0.069	0.527	FALSE	NA
10048	RANBP9	RAN binding protein 9	15	0	0	0.5	1	0.558	0.114	0.526	FALSE	NA
2547	XRCC6	X-ray repair cross complementing 6	96	0	0	0.5	1	0.861	0.245	0.526	FALSE	NA
3674	ITGA2B	integrin subunit alpha 2b	143	0	0	0	0	0.966	0.285	0.526	FALSE	NA
51203	NUSAP1	nucleolar and spindle associated protein 1	104	0	0.5	0	1	0.844	0.238	0.526	FALSE	NA
85437	ZCRB1	zinc finger CCHC-type and RNA binding motif containing 1	59	0	0.5	0	1	0.709	0.181	0.526	FALSE	NA
9985	REC8	REC8 meiotic recombination protein	65	0	0	0.5	1	0.764	0.205	0.526	FALSE	NA
2628	GATM	glycine amidinotransferase	38	1	0	0	1	0.745	0.197	0.525	FALSE	NA
466	ATF1	activating transcription factor 1	19	0	0	0.5	1	0.604	0.135	0.525	FALSE	NA
5339	PLEC	plectin	117	0	0.5	0	1	0.865	0.247	0.525	FALSE	NA
54732	TMED9	transmembrane p24 trafficking protein 9	135	0	0	0.5	1	0.893	0.258	0.525	FALSE	NA
7936	NELFE	negative elongation factor complex member E	74	0	0.5	0	1	0.765	0.206	0.525	FALSE	NA
91750	LIN52	lin-52 DREAM MuvB core complex component	27	0	0.5	0	1	0.604	0.135	0.525	FALSE	NA
23208	SYT11	synaptotagmin 11	119	0	0	0.5	1	0.858	0.245	0.524	FALSE	NA
27154	BRPF3	bromodomain and PHD finger containing 3	25	0	0	0.5	1	0.614	0.14	0.524	FALSE	NA
79158	GNPTAB	N-acetylglucosamine-1-phosphate transferase subunits alpha and beta	10	0	0	1	1	0.487	0.084	0.524	FALSE	NA
23030	KDM4B	lysine demethylase 4B	48	0.5	0	0	1	0.732	0.193	0.523	FALSE	NA
25827	FBXL2	F-box and leucine rich repeat protein 2	27	0	0.5	0	1	0.552	0.113	0.523	FALSE	NA
27086	FOXP1	forkhead box P1	1	1	0	0.5	2	0.359	0.035	0.523	FALSE	NA
55320	MIS18BP1	MIS18 binding protein 1	81	0.5	0	0	1	0.8	0.222	0.523	FALSE	NA
5310	PKD1	polycystin 1, transient receptor potential channel interacting	20	0.5	0	0	1	0.542	0.109	0.522	FALSE	NA
57104	PNPLA2	patatin like phospholipase domain containing 2	121	0	0	0.5	1	0.882	0.256	0.522	FALSE	NA
7450	VWF	von Willebrand factor	140	0	0	0.5	1	0.957	0.285	0.522	FALSE	NA
79074	C2orf49	chromosome 2 open reading frame 49	7	0	1	0	1	0.454	0.071	0.522	FALSE	NA
2494	NR5A2	nuclear receptor subfamily 5 group A member 2	42	0	0	0.5	1	0.677	0.17	0.521	FALSE	NA
6331	SCN5A	sodium voltage-gated channel alpha subunit 5	29	0	0	0.5	1	0.624	0.146	0.521	FALSE	NA
80205	CHD9	chromodomain helicase DNA binding protein 9	57	0	0	0.5	1	0.79	0.219	0.521	FALSE	NA
11098	PRSS23	serine protease 23	108	0	0	0.5	1	0.844	0.242	0.52	FALSE	NA
285855	RPL7L1	ribosomal protein L7 like 1	76	0	0	1	1	0.769	0.211	0.52	FALSE	NA
8128	ST8SIA2	ST8 alpha-N-acetyl-neuraminide alpha-2,8-sialyltransferase 2	4	1	0	0	1	0.378	0.042	0.52	FALSE	NA
2742	GLRA2	glycine receptor alpha 2	4	0.5	0	0	1	0.456	0.073	0.519	FALSE	NA
2946	GSTM2	glutathione S-transferase mu 2	5	0	0.5	0.5	2	0.447	0.069	0.519	FALSE	NA
491	ATP2B2	ATPase plasma membrane Ca2+ transporting 2	2	1	0	0	1	0.365	0.038	0.519	FALSE	NA
83667	SESN2	sestrin 2	19	0.5	0	0	1	0.608	0.14	0.519	FALSE	NA
84168	ANTXR1	ANTXR cell adhesion molecule 1	2	0.5	0	0	1	0.401	0.051	0.519	FALSE	NA
100528064	NEDD8-MDP1	NEDD8-MDP1 readthrough	13	0.5	0	0	1	0.481	0.084	0.518	FALSE	NA
5150	PDE7A	phosphodiesterase 7A	5	0.5	0	0.5	2	0.414	0.056	0.518	FALSE	NA
6402	SELL	selectin L	6	0	0	0.5	1	0.441	0.067	0.518	FALSE	NA
5792	PTPRF	protein tyrosine phosphatase receptor type F	21	0.5	0	0	1	0.625	0.149	0.517	FALSE	NA
6871	TADA2A	transcriptional adaptor 2A	35	0	0	0.5	1	0.632	0.152	0.517	FALSE	NA
201254	CENPX	centromere protein X	87	0.5	0	0	1	0.822	0.236	0.516	FALSE	NA
6683	SPAST	spastin	5	1	0	0.5	2	0.372	0.041	0.516	FALSE	NA
395	ARHGAP6	Rho GTPase activating protein 6	27	0.5	0	0	1	0.636	0.155	0.515	FALSE	NA
50807	ASAP1	ArfGAP with SH3 domain, ankyrin repeat and PH domain 1	36	0	0	0.5	1	0.698	0.183	0.515	FALSE	NA
822	CAPG	capping actin protein, gelsolin like	12	0.5	0	0	1	0.549	0.116	0.514	FALSE	NA
2548	GAA	glucosidase alpha, acid	125	0	0	0.5	1	0.884	0.263	0.513	FALSE	NA
84893	FBH1	F-box DNA helicase 1	28	0.5	0	0	1	0.554	0.119	0.513	FALSE	NA
2099	ESR1	estrogen receptor 1	228	0	0	0	0	1.197	0.374	0.511	FALSE	NA
63976	PRDM16	PR/SET domain 16	2	0	1	0	1	0.372	0.042	0.511	FALSE	NA
6776	STAT5A	signal transducer and activator of transcription 5A	131	0	0	0	0	0.994	0.306	0.511	FALSE	NA
79685	SAP30L	SAP30 like	74	0	0	0.5	1	0.784	0.223	0.511	FALSE	NA
10484	SEC23A	Sec23 homolog A, coat complex II component	116	0	0	0.5	1	0.877	0.262	0.51	FALSE	NA
1870	E2F2	E2F transcription factor 2	45	0	0	0.5	1	0.685	0.18	0.51	FALSE	NA
6124	RPL4	ribosomal protein L4	232	0	0	0.5	1	0.96	0.294	0.51	FALSE	NA
6548	SLC9A1	solute carrier family 9 member A1	49	0	0	0	0	0.827	0.242	0.51	FALSE	NA
10134	BCAP31	B cell receptor associated protein 31	8	0	0	1	1	0.436	0.068	0.509	FALSE	NA
51013	EXOSC1	exosome component 1	143	0	0.5	0	1	0.862	0.257	0.509	FALSE	NA
51608	GET4	golgi to ER traffic protein 4	5	0	0.5	0	1	0.397	0.052	0.509	FALSE	NA
51764	GNG13	G protein subunit gamma 13	497	0.5	0	0	1	1.186	0.372	0.509	FALSE	NA
10772	SRSF10	serine and arginine rich splicing factor 10	76	0	0	0.5	1	0.745	0.208	0.508	FALSE	NA
10943	MSL3	MSL complex subunit 3	45	0	0	0.5	1	0.664	0.172	0.508	FALSE	NA
1848	DUSP6	dual specificity phosphatase 6	10	0	0.5	0	1	0.515	0.103	0.508	FALSE	NA
23139	MAST2	microtubule associated serine/threonine kinase 2	1	0.5	0	0	1	0.34	0.032	0.508	FALSE	NA
6139	RPL17	ribosomal protein L17	223	0	0	0.5	1	0.968	0.299	0.508	FALSE	NA
79143	MBOAT7	membrane bound O-acyltransferase domain containing 7	16	1	0	0	1	0.535	0.112	0.508	FALSE	NA
841	CASP8	caspase 8	109	0	0	0.5	1	0.943	0.289	0.508	FALSE	NA
9294	S1PR2	sphingosine-1-phosphate receptor 2	241	0	0.5	0	1	0.932	0.285	0.508	FALSE	NA
30012	TLX3	T cell leukemia homeobox 3	1	0	0	0	0	0.54	0.115	0.507	FALSE	NA
93594	TBC1D31	TBC1 domain family member 31	1	1	0	0	1	0.369	0.042	0.507	FALSE	NA
9404	LPXN	leupaxin	15	0	0.5	0	1	0.509	0.101	0.507	FALSE	NA
9782	MATR3	matrin 3	56	0	0	0.5	1	0.682	0.181	0.507	FALSE	NA
1103	CHAT	choline O-acetyltransferase	6	0	0.5	0	1	0.459	0.079	0.506	FALSE	NA
3267	AGFG1	ArfGAP with FG repeats 1	118	0	0	0.5	1	0.858	0.257	0.506	FALSE	NA
3305	HSPA1L	heat shock protein family A (Hsp70) member 1 like	80	0	0	0.5	1	0.8	0.233	0.506	FALSE	NA
5520	PPP2R2A	protein phosphatase 2 regulatory subunit Balpha	176	0	0	0.5	1	0.97	0.301	0.506	FALSE	NA
10548	TM9SF1	transmembrane 9 superfamily member 1	8	0.5	0	0	1	0.416	0.061	0.505	FALSE	NA
5585	PKN1	protein kinase N1	55	0	0	0.5	1	0.763	0.219	0.504	FALSE	NA
286204	CRB2	crumbs cell polarity complex component 2	4	0	0.5	0	1	0.368	0.043	0.503	FALSE	NA
55167	MSL2	MSL complex subunit 2	29	0	0	0.5	1	0.61	0.15	0.503	FALSE	NA
5037	PEBP1	phosphatidylethanolamine binding protein 1	68	0	0	0.5	1	0.782	0.228	0.502	FALSE	NA
6416	MAP2K4	mitogen-activated protein kinase kinase 4	84	0	0	0.5	1	0.845	0.255	0.502	FALSE	NA
27248	ERLEC1	endoplasmic reticulum lectin 1	26	0	0.5	0	1	0.665	0.177	0.5	FALSE	NA
353376	TICAM2	toll like receptor adaptor molecule 2	43	0	0.5	0	1	0.74	0.211	0.5	FALSE	NA
6950	TCP1	t-complex 1	124	0	0	0.5	1	0.898	0.278	0.5	FALSE	NA
9580	SOX13	SRY-box 13	7	0	0	0	0	0.5	0.1	0.5	FALSE	NA
1495	CTNNA1	catenin alpha 1	131	0	0	0	0	1.01	0.321	0.499	FALSE	NA
1524	CX3CR1	C-X3-C motif chemokine receptor 1	228	0	0	1	1	0.863	0.264	0.499	FALSE	NA
196441	ZFC3H1	zinc finger C3H1-type containing	22	0	0.5	0	1	0.533	0.116	0.499	FALSE	NA
23168	RTF1	RTF1 homolog, Paf1/RNA polymerase II complex component	86	0.5	0	0	1	0.824	0.248	0.499	FALSE	NA
7024	TFCP2	transcription factor CP2	4	0	0	1	1	0.391	0.053	0.499	FALSE	NA
51741	WWOX	WW domain containing oxidoreductase	4	1	0	0	1	0.348	0.037	0.498	FALSE	NA
54951	COMMD8	COMM domain containing 8	184	0	0	0.5	1	0.861	0.264	0.498	FALSE	NA
6217	RPS16	ribosomal protein S16	284	0	0	0.5	1	1.009	0.321	0.498	FALSE	NA
6237	RRAS	RAS related	74	0	0	0	0	0.828	0.25	0.498	FALSE	NA
367	AR	androgen receptor	123	0	0	0	0	0.945	0.298	0.497	FALSE	NA
81027	TUBB1	tubulin beta 1 class VI	41	0	0.5	0	1	0.694	0.192	0.497	FALSE	NA
84516	DCTN5	dynactin subunit 5	147	0	0	0.5	1	0.924	0.29	0.497	FALSE	NA
9148	NEURL1	neuralized E3 ubiquitin protein ligase 1	11	0	0.5	0	1	0.56	0.13	0.496	FALSE	NA
2043	EPHA4	EPH receptor A4	40	0	0	0.5	1	0.656	0.176	0.495	FALSE	NA
26097	CHTOP	chromatin target of PRMT1	106	0	0	0.5	1	0.796	0.239	0.495	FALSE	NA
91748	ELMSAN1	ELM2 and Myb/SANT domain containing 1	1	0	0.5	1	2	0.339	0.035	0.494	FALSE	NA
29904	EEF2K	eukaryotic elongation factor 2 kinase	19	0	0	0.5	1	0.531	0.118	0.493	FALSE	NA
6233	RPS27A	ribosomal protein S27a	1393	0	0	0	0	2.221	0.6	0.493	FALSE	NA
65220	NADK	NAD kinase	11	0	1	0	1	0.488	0.098	0.493	FALSE	NA
93973	ACTR8	actin related protein 8	39	0	0	0.5	1	0.632	0.166	0.493	FALSE	NA
286151	FBXO43	F-box protein 43	16	0	0.5	0	1	0.507	0.107	0.492	FALSE	NA
55317	AP5S1	adaptor related protein complex 5 subunit sigma 1	21	0	0	0.5	1	0.52	0.113	0.492	FALSE	NA
83452	RAB33B	RAB33B, member RAS oncogene family	88	0	0	0.5	1	0.841	0.261	0.491	FALSE	NA
9682	KDM4A	lysine demethylase 4A	51	0.5	0	0	1	0.713	0.205	0.491	FALSE	NA
144100	PLEKHA7	pleckstrin homology domain containing A7	5	0	0.5	0	1	0.411	0.064	0.49	FALSE	NA
23221	RHOBTB2	Rho related BTB domain containing 2	142	0	0	0	0	0.982	0.317	0.49	FALSE	NA
254048	UBN2	ubinuclein 2	3	1	0	0.5	2	0.327	0.032	0.49	FALSE	NA
5325	PLAGL1	PLAG1 like zinc finger 1	1	0	0.5	0.5	2	0.449	0.081	0.49	FALSE	NA
6202	RPS8	ribosomal protein S8	291	0	0	0.5	1	1.023	0.332	0.49	FALSE	NA
9891	NUAK1	NUAK family kinase 1	2	1	0	0	1	0.384	0.053	0.49	FALSE	NA
140885	SIRPA	signal regulatory protein alpha	79	0	0	0.5	1	0.782	0.237	0.489	FALSE	NA
6201	RPS7	ribosomal protein S7	317	0	0	0.5	1	1.035	0.337	0.489	FALSE	NA
3766	KCNJ10	potassium voltage-gated channel subfamily J member 10	17	1	0	0	1	0.538	0.124	0.488	FALSE	NA
51575	ESF1	ESF1 nucleolar pre-rRNA processing protein homolog	129	0	0	1	1	0.832	0.259	0.488	FALSE	NA
54542	RC3H2	ring finger and CCCH-type domains 2	3	0	0	0.5	1	0.333	0.034	0.488	FALSE	NA
10516	FBLN5	fibulin 5	16	0	0.5	0	1	0.535	0.123	0.487	FALSE	NA
11218	DDX20	DEAD-box helicase 20	61	0.5	0	0	1	0.684	0.194	0.487	FALSE	NA
123904	NRN1L	neuritin 1 like	66	0	0.5	0	1	0.727	0.214	0.487	FALSE	NA
3048	HBG2	hemoglobin subunit gamma 2	12	0	0	1	1	0.487	0.1	0.487	FALSE	NA
4781	NFIB	nuclear factor I B	18	1	0	0	1	0.523	0.117	0.487	FALSE	NA
7294	TXK	TXK tyrosine kinase	14	0	0	0.5	1	0.487	0.1	0.487	FALSE	NA
8242	KDM5C	lysine demethylase 5C	3	1	0	0	1	0.326	0.032	0.487	FALSE	NA
11340	EXOSC8	exosome component 8	141	0	0.5	0	1	0.855	0.27	0.486	FALSE	NA
7531	YWHAE	tyrosine 3-monooxygenase/tryptophan 5-monooxygenase activation protein epsilon	217	0	0	0	0	1.086	0.357	0.486	FALSE	NA
91614	DEPDC7	DEP domain containing 7	20	0.5	0	0	1	0.571	0.141	0.486	FALSE	NA
10865	ARID5A	AT-rich interaction domain 5A	1	0	0	0	0	0.455	0.086	0.485	FALSE	NA
1368	CPM	carboxypeptidase M	66	0	0.5	0	1	0.727	0.215	0.485	FALSE	NA
3105	HLA-A	major histocompatibility complex, class I, A	167	0.5	0	0	1	1.013	0.333	0.484	FALSE	NA
391	RHOG	ras homolog family member G	160	0	0	0	0	1.061	0.35	0.484	FALSE	NA
4929	NR4A2	nuclear receptor subfamily 4 group A member 2	6	0.5	0	0.5	2	0.415	0.068	0.484	FALSE	NA
6016	RIT1	Ras like without CAAX 1	10	0	0	0.5	1	0.452	0.085	0.484	FALSE	NA
6119	RPA3	replication protein A3	239	0	0	0.5	1	1.139	0.376	0.484	FALSE	NA
80853	KDM7A	lysine demethylase 7A	78	0	0	0.5	1	0.763	0.232	0.484	FALSE	NA
11035	RIPK3	receptor interacting serine/threonine kinase 3	43	0	0	0.5	1	0.675	0.193	0.483	FALSE	NA
18	ABAT	4-aminobutyrate aminotransferase	36	0	0	0.5	1	0.719	0.213	0.483	FALSE	NA
22877	MLXIP	MLX interacting protein	4	0	1	0	1	0.361	0.046	0.483	FALSE	NA
3054	HCFC1	host cell factor C1	70	0	0	0.5	1	0.809	0.253	0.483	FALSE	NA
3074	HEXB	hexosaminidase subunit beta	100	0	0	0.5	1	0.867	0.277	0.483	FALSE	NA
26286	ARFGAP3	ADP ribosylation factor GTPase activating protein 3	111	0	0	0.5	1	0.838	0.266	0.482	FALSE	NA
51384	WNT16	Wnt family member 16	32	0	0.5	0	1	0.608	0.161	0.482	FALSE	NA
1455	CSNK1G2	casein kinase 1 gamma 2	28	0	0.5	0	1	0.578	0.147	0.481	FALSE	NA
23435	TARDBP	TAR DNA binding protein	46	0	0	0.5	1	0.648	0.181	0.481	FALSE	NA
54583	EGLN1	egl-9 family hypoxia inducible factor 1	73	0	0	0.5	1	0.751	0.229	0.481	FALSE	NA
55326	AGPAT5	1-acylglycerol-3-phosphate O-acyltransferase 5	23	0	1	0	1	0.609	0.162	0.481	FALSE	NA
6687	SPG7	SPG7 matrix AAA peptidase subunit, paraplegin	25	0	0.5	0	1	0.623	0.169	0.481	FALSE	NA
145173	B3GLCT	beta 3-glucosyltransferase	36	0	0.5	0	1	0.628	0.172	0.48	FALSE	NA
4225	MEP1B	meprin A subunit beta	11	0	0.5	0	1	0.494	0.107	0.48	FALSE	NA
5032	P2RY11	purinergic receptor P2Y11	252	0	0.5	0	1	0.927	0.304	0.48	FALSE	NA
50649	ARHGEF4	Rho guanine nucleotide exchange factor 4	22	0	0.5	0	1	0.578	0.148	0.48	FALSE	NA
57597	BAHCC1	BAH domain and coiled-coil containing 1	1	0.5	0.5	0	2	0.324	0.033	0.48	FALSE	NA
7048	TGFBR2	transforming growth factor beta receptor 2	79	0	0	0.5	1	0.792	0.248	0.48	FALSE	NA
8326	FZD9	frizzled class receptor 9	22	0.5	0	0	1	0.559	0.138	0.48	FALSE	NA
26524	LATS2	large tumor suppressor kinase 2	20	0.5	0	0	1	0.567	0.143	0.479	FALSE	NA
146909	KIF18B	kinesin family member 18B	94	0	0.5	0	1	0.767	0.238	0.478	FALSE	NA
2149	F2R	coagulation factor II thrombin receptor	183	0.5	0	0	1	0.872	0.283	0.478	FALSE	NA
4774	NFIA	nuclear factor I A	24	0	0.5	0	1	0.572	0.146	0.478	FALSE	NA
5596	MAPK4	mitogen-activated protein kinase 4	13	0	0.5	0	1	0.501	0.111	0.478	FALSE	NA
56413	LTB4R2	leukotriene B4 receptor 2	157	0	0.5	0	1	0.801	0.253	0.478	FALSE	NA
9261	MAPKAPK2	mitogen-activated protein kinase-activated protein kinase 2	68	0	0	0.5	1	0.781	0.244	0.478	FALSE	NA
22931	RAB18	RAB18, member RAS oncogene family	93	0	0	0.5	1	0.811	0.258	0.477	FALSE	NA
23363	OBSL1	obscurin like 1	14	0.5	0	0	1	0.561	0.141	0.477	FALSE	NA
7402	UTRN	utrophin	45	0	0	0.5	1	0.672	0.195	0.477	FALSE	NA
26119	LDLRAP1	low density lipoprotein receptor adaptor protein 1	120	0	0	0.5	1	0.863	0.281	0.476	FALSE	NA
200576	PIKFYVE	phosphoinositide kinase, FYVE-type zinc finger containing	37	0	0	0	0	0.706	0.212	0.475	FALSE	NA
3687	ITGAX	integrin subunit alpha X	103	0	0	0.5	1	0.843	0.273	0.475	FALSE	NA
4217	MAP3K5	mitogen-activated protein kinase kinase kinase 5	58	0	0	0.5	1	0.783	0.247	0.475	FALSE	NA
6605	SMARCE1	SWI/SNF related, matrix associated, actin dependent regulator of chromatin, subfamily e, member 1	73	0	0	0	0	0.791	0.251	0.475	FALSE	NA
79577	CDC73	cell division cycle 73	98	0	0	0.5	1	0.827	0.267	0.474	FALSE	NA
84321	THOC3	THO complex 3	90	0	0	0.5	1	0.738	0.228	0.474	FALSE	NA
9978	RBX1	ring-box 1	551	0	0	0	0	1.253	0.419	0.474	FALSE	NA
4291	MLF1	myeloid leukemia factor 1	1	0	1	0	1	0.346	0.043	0.473	FALSE	NA
4690	NCK1	NCK adaptor protein 1	160	0	0	0	0	1.037	0.35	0.473	FALSE	NA
6854	SYN2	synapsin II	21	0	0.5	0	1	0.562	0.144	0.473	FALSE	NA
8038	ADAM12	ADAM metallopeptidase domain 12	8	0.5	0	0	1	0.436	0.082	0.473	FALSE	NA
3354	HTR1E	5-hydroxytryptamine receptor 1E	228	0	0.5	0	1	0.813	0.263	0.472	FALSE	NA
23137	SMC5	structural maintenance of chromosomes 5	28	0	0	0.5	1	0.584	0.156	0.471	FALSE	NA
57578	UNC79	unc-79 homolog, NALCN channel complex subunit	2	1	0	0	1	0.462	0.096	0.471	FALSE	NA
7475	WNT6	Wnt family member 6	32	0	0.5	0	1	0.608	0.168	0.471	FALSE	NA
7482	WNT2B	Wnt family member 2B	32	0	0.5	0	1	0.608	0.168	0.471	FALSE	NA
80153	EDC3	enhancer of mRNA decapping 3	14	0	0.5	0.5	2	0.456	0.093	0.471	FALSE	NA
116224	FAM122A	family with sequence similarity 122A	4	0	0.5	1	2	0.424	0.078	0.47	FALSE	NA
4926	NUMA1	nuclear mitotic apparatus protein 1	94	0	0	0.5	1	0.799	0.258	0.47	FALSE	NA
6654	SOS1	SOS Ras/Rac guanine nucleotide exchange factor 1	276	0	0	0	0	1.295	0.434	0.47	FALSE	NA
84515	MCM8	minichromosome maintenance 8 homologous recombination repair factor	51	0	0.5	0	1	0.697	0.212	0.47	FALSE	NA
1936	EEF1D	eukaryotic translation elongation factor 1 delta	61	0	0.5	0	1	0.688	0.208	0.469	FALSE	NA
5786	PTPRA	protein tyrosine phosphatase receptor type A	19	0	0.5	0	1	0.561	0.146	0.469	FALSE	NA
79101	TAF1D	TATA-box binding protein associated factor, RNA polymerase I subunit D	79	0	0	0.5	1	0.747	0.236	0.469	FALSE	NA
11276	SYNRG	synergin gamma	53	0	0	0.5	1	0.67	0.2	0.468	FALSE	NA
51399	TRAPPC4	trafficking protein particle complex 4	73	0	0	0.5	1	0.746	0.236	0.468	FALSE	NA
58504	ARHGAP22	Rho GTPase activating protein 22	19	0	0.5	0	1	0.556	0.144	0.468	FALSE	NA
23091	ZC3H13	zinc finger CCCH-type containing 13	37	0	0	0.5	1	0.617	0.175	0.467	FALSE	NA
28988	DBNL	drebrin like	100	0	0	0	0	0.867	0.289	0.467	FALSE	NA
5208	PFKFB2	6-phosphofructo-2-kinase/fructose-2,6-biphosphatase 2	14	0	0	0.5	1	0.523	0.128	0.467	FALSE	NA
708	C1QBP	complement C1q binding protein	34	0	0	0.5	1	0.606	0.17	0.467	FALSE	NA
7290	HIRA	histone cell cycle regulator	17	0.5	0	0	1	0.527	0.13	0.467	FALSE	NA
84271	POLDIP3	DNA polymerase delta interacting protein 3	86	0	0	0.5	1	0.697	0.214	0.467	FALSE	NA
9111	NMI	N-myc and STAT interactor	26	0	0	0.5	1	0.559	0.146	0.467	FALSE	NA
9919	SEC16A	SEC16 homolog A, endoplasmic reticulum export factor	54	0	0	0.5	1	0.674	0.203	0.467	FALSE	NA
199675	MCEMP1	mast cell expressed membrane protein 1	112	0	0	0.5	1	0.792	0.258	0.466	FALSE	NA
3611	ILK	integrin linked kinase	64	0	0	0.5	1	0.796	0.26	0.466	FALSE	NA
4033	LRMP	lymphoid restricted membrane protein	54	0	0	0.5	1	0.665	0.199	0.466	FALSE	NA
57381	RHOJ	ras homolog family member J	140	0	0	0	0	0.985	0.337	0.466	FALSE	NA
7284	TUFM	Tu translation elongation factor, mitochondrial	130	0	0.5	0.5	2	0.845	0.281	0.466	FALSE	NA
9886	RHOBTB1	Rho related BTB domain containing 1	143	0	0	0	0	0.983	0.336	0.466	FALSE	NA
22848	AAK1	AP2 associated kinase 1	122	0	0	0.5	1	0.866	0.29	0.465	FALSE	NA
537	ATP6AP1	ATPase H+ transporting accessory protein 1	54	0.5	0	0	1	0.739	0.235	0.465	FALSE	NA
6194	RPS6	ribosomal protein S6	326	0	0	0.5	1	1.057	0.363	0.465	FALSE	NA
10942	PRSS21	serine protease 21	66	0	0.5	0	1	0.727	0.23	0.464	FALSE	NA
1629	DBT	dihydrolipoamide branched chain transacylase E2	48	0	0	0.5	1	0.778	0.253	0.464	FALSE	NA
2057	EPOR	erythropoietin receptor	29	0	0	0.5	1	0.587	0.162	0.464	FALSE	NA
29984	RHOD	ras homolog family member D	144	0	0	0	0	1.012	0.348	0.464	FALSE	NA
3061	HCRTR1	hypocretin receptor 1	157	0	0.5	0	1	0.801	0.264	0.464	FALSE	NA
[truncated: 10,740 more rows]

## Sheet: 3
gene_id	symbol	description	GEN	EPI	TRA	d	p	dp	Gilman2011	Li2014	Hormozdiari2015	Parikshak2013	Pinto2014	Other Studies
1778	DYNC1H1	dynein cytoplasmic 1 heavy chain 1	1	1	0.5	3.84797	0.003	9.70797	0	CLUST2, CLUST3	0	0	0	TRUE
2475	MTOR	mechanistic target of rapamycin kinase	1	1	0	3.16944	0.001	9.50831	0	CLUST64	0	0	0	FALSE
55904	KMT2E	lysine methyltransferase 2E	1	1	0.5	2.93285	0.001	8.79854	0	CLUST2	0	M2	0	TRUE
4089	SMAD4	SMAD family member 4	1	0.5	0.5	3.30926	0.003	8.34885	0	CLUST2	ASD_ID_M1_Extended, ASD_without_ID_M1_Extended	M3	0	TRUE
6934	TCF7L2	transcription factor 7 like 2	1	1	0	3.06922	0.002	8.28372	0	CLUST2	0	M15	0	TRUE
6925	TCF4	transcription factor 4	1	1	0	2.73088	0.001	8.19263	0	CLUST2	ASD_ID_M1_Extended, ASD_with_ID_M1_Extended	0	0	TRUE
3198	HOXA1	homeobox A1	1	1	0	2.608	0.001	7.824	0	CLUST8	0	0	0	FALSE
23241	PACS2	phosphofurin acidic cluster sorting protein 2	1	1	0	2.51362	0.001	7.54087	0	0	0	M14	0	FALSE
25942	SIN3A	SIN3 transcription regulator family member A	1	0	1	3.07383	0.004	7.37086	0	CLUST2	ASD_ID_M1_Extended, ASD_without_ID_M1_Extended	M3	0	TRUE
1439	CSF2RB	colony stimulating factor 2 receptor beta common subunit	0	1	1	2.45202	0.001	7.35605	0	CLUST4	0	0	0	FALSE
6601	SMARCC2	SWI/SNF related, matrix associated, actin dependent regulator of chromatin subfamily c member 2	1	0.5	0.5	2.71894	0.002	7.33835	0	CLUST2	ASD_ID_M1_Extended, ASD_with_ID_M1_Extended	M3	0	TRUE
7249	TSC2	TSC complex subunit 2	1	0.5	0	2.36699	0.001	7.10096	0	CLUST4	ASD_without_ID_M1_Extended	M3	0	TRUE
5567	PRKACB	protein kinase cAMP-activated catalytic subunit beta	0.5	1	0	3.13464	0.007	6.75485	0	0	0	M16	0	TRUE
6095	RORA	RAR related orphan receptor A	1	0.5	0.5	2.16572	0.001	6.49715	0	CLUST2	0	M13	0	TRUE
22884	WDR37	WD repeat domain 37	0	0	0.5	2.15666	0.001	6.46997	0	CLUST28	0	0	0	FALSE
2033	EP300	E1A binding protein p300	1	0	0.5	3.34997	0.014	6.21042	0	CLUST2	ASD_ID_M1_Extended, ASD_with_ID_M1_Extended, ASD_without_ID_M1_Extended	M2	0	TRUE
57492	ARID1B	AT-rich interaction domain 1B	1	1	0	2.29627	0.002	6.19757	0	CLUST2	ASD_ID_M1_Extended, ASD_with_ID_M1_Extended	M3	0	TRUE
2185	PTK2B	protein tyrosine kinase 2 beta	0	1	0.5	2.41601	0.003	6.09531	0	CLUST4	0	M13	0	TRUE
58508	KMT2C	lysine methyltransferase 2C	1	0	1	2.69795	0.006	5.99444	0	CLUST2	ASD_ID_M1_Extended, ASD_without_ID_M1_Extended	M2	0	TRUE
8295	TRRAP	transformation/transcription domain associated protein	0.5	1	0.5	2.67974	0.006	5.95398	0	CLUST2	ASD_ID_M1_Extended, ASD_without_ID_M1_Extended	M2	0	TRUE
1499	CTNNB1	catenin beta 1	1	0	0.5	3.25155	0.016	5.83939	0	CLUST2	ASD_ID_M1_Extended, ASD_with_ID_M1_Extended, ASD_without_ID_M1_Extended	0	0	TRUE
773	CACNA1A	calcium voltage-gated channel subunit alpha1 A	1	0.5	0	2.14049	0.002	5.77712	0	CLUST37	0	0	0	FALSE
90506	LRRC46	leucine rich repeat containing 46	0	0	0	2.28143	0.003	5.75576	0	0	0	0	0	FALSE
26523	AGO1	argonaute RISC component 1	1	0.5	0	2.63109	0.007	5.66973	0	CLUST3	ASD_ID_M1_Extended	M3	0	TRUE
23067	SETD1B	SET domain containing 1B, histone lysine methyltransferase	1	0	1	2.23042	0.003	5.62708	0	CLUST2	0	M2	0	TRUE
4208	MEF2C	myocyte enhancer factor 2C	1	0	1	2.52736	0.006	5.61542	0	CLUST2	0	0	0	TRUE
9611	NCOR1	nuclear receptor corepressor 1	1	0	0.5	2.85712	0.011	5.59598	0	CLUST2	ASD_ID_M1_Extended, ASD_with_ID_M1_Extended, ASD_without_ID_M1_Extended	M6	0	TRUE
1523	CUX1	cut like homeobox 1	1	1	0.5	2.19237	0.003	5.53107	0	CLUST2	0	0	0	TRUE
6720	SREBF1	sterol regulatory element binding transcription factor 1	0	1	0.5	1.81136	0.001	5.43407	0	CLUST20	0	0	1	TRUE
6850	SYK	spleen associated tyrosine kinase	0	1	0.5	2.76479	0.011	5.41515	0	CLUST4	0	M18	0	FALSE
5579	PRKCB	protein kinase C beta	1	0	0.5	2.56087	0.008	5.36991	0	CLUST4	ASD_ID_M2_Extended, ASD_with_ID_M2_Extended	M13	0	TRUE
3932	LCK	LCK proto-oncogene, Src family tyrosine kinase	0.5	0.5	0.5	2.72962	0.012	5.2431	0	CLUST4	0	0	0	FALSE
25836	NIPBL	NIPBL cohesin loading factor	1	0	1	2.26301	0.005	5.20725	0	CLUST56	0	M2	0	TRUE
5296	PIK3R2	phosphoinositide-3-kinase regulatory subunit 2	1	0.5	0	2.8499	0.015	5.19795	0	CLUST4	ASD_ID_M1_Extended, ASD_without_ID_M1_Extended	0	0	TRUE
5578	PRKCA	protein kinase C alpha	0.5	0.5	0.5	2.65955	0.012	5.10851	0	0	0	0	0	FALSE
5528	PPP2R5D	protein phosphatase 2 regulatory subunit B'delta	1	0	0.5	2.59098	0.012	4.9768	0	CLUST15	0	0	0	FALSE
8850	KAT2B	lysine acetyltransferase 2B	1	0	0.5	2.74825	0.017	4.86316	0	CLUST2	0	M1	1	TRUE
57634	EP400	E1A binding protein p400	1	0.5	0.5	2.29197	0.008	4.80606	0	CLUST2	ASD_without_ID_M1_Extended	M2	0	TRUE
60412	EXOC4	exocyst complex component 4	0.5	0.5	1	2.13755	0.006	4.74932	0	CLUST13	0	0	0	TRUE
604	BCL6	BCL6 transcription repressor	0	1	0.5	1.97656	0.004	4.73968	0	CLUST2	0	0	0	TRUE
3192	HNRNPU	heterogeneous nuclear ribonucleoprotein U	1	0	1	2.3598	0.01	4.71961	0	CLUST3	0	0	0	FALSE
9759	HDAC4	histone deacetylase 4	1	0.5	0	2.24588	0.008	4.7094	0	CLUST2	0	0	0	TRUE
5080	PAX6	paired box 6	1	0.5	0	2.11163	0.006	4.69173	0	CLUST2	0	M8	0	TRUE
9320	TRIP12	thyroid hormone receptor interactor 12	1	0	1	2.45942	0.013	4.6386	0	CLUST19	ASD_with_ID_M1_Extended	0	1	TRUE
22941	SHANK2	SH3 and multiple ankyrin repeat domains 2	1	0.5	0	1.82667	0.003	4.60846	0	CLUST13	ASD_ID_M2_Extended	M16	1	TRUE
83696	TRAPPC9	trafficking protein particle complex 9	1	0.5	0.5	1.99287	0.005	4.58565	0	CLUST1	0	M9	0	FALSE
3326	HSP90AB1	heat shock protein 90 alpha family class B member 1	0	1	0.5	2.38457	0.012	4.58033	0	CLUST6	0	M16	0	TRUE
2534	FYN	FYN proto-oncogene, Src family tyrosine kinase	0	0.5	1	2.82945	0.025	4.53295	0	CLUST4	ASD_without_ID_M1_Extended	0	0	TRUE
7528	YY1	YY1 transcription factor	1	0	0.5	2.35955	0.012	4.53227	0	CLUST2	ASD_ID_M1_Extended, ASD_with_ID_M1_Extended, ASD_without_ID_M1_Extended	M9	0	TRUE
6261	RYR1	ryanodine receptor 1	0.5	1	0	1.88322	0.004	4.51584	0	CLUST55	0	0	0	FALSE
2290	FOXG1	forkhead box G1	1	1	0	1.50037	0.001	4.50111	0	CLUST10	0	M2	0	TRUE
9939	RBM8A	RNA binding motif protein 8A	0	1	0.5	2.32981	0.012	4.47515	0	CLUST3	0	0	0	FALSE
7428	VHL	von Hippel-Lindau tumor suppressor	0	1	0.5	2.33176	0.013	4.39783	0	CLUST3	0	M6	0	FALSE
2200	FBN1	fibrillin 1	1	0.5	0	2.23339	0.011	4.37433	0	CLUST53	0	M18	0	FALSE
57520	HECW2	HECT, C2 and WW domain containing E3 ubiquitin protein ligase 2	1	0.5	0	2.31773	0.013	4.37137	0	CLUST2	0	0	0	TRUE
375	ARF1	ADP ribosylation factor 1	0	1	0.5	2.49333	0.018	4.35019	0	CLUST14	0	0	0	FALSE
2768	GNA12	G protein subunit alpha 12	0.5	1	0	2.0814	0.009	4.25803	0	CLUST4	0	0	0	FALSE
79019	CENPM	centromere protein M	0	1	0.5	2.23823	0.013	4.22144	0	0	0	M11	0	FALSE
1107	CHD3	chromodomain helicase DNA binding protein 3	1	0	1	2.29785	0.015	4.19106	0	CLUST2	ASD_without_ID_M1_Extended	M2	0	TRUE
23389	MED13L	mediator complex subunit 13 like	1	0.5	0	2.0405	0.009	4.17437	0	CLUST20	0	M2	0	TRUE
5062	PAK2	p21 (RAC1) activated kinase 2	1	0	0.5	2.45695	0.02	4.17429	1	CLUST4	0	0	0	TRUE
4067	LYN	LYN proto-oncogene, Src family tyrosine kinase	0	1	0	2.38798	0.018	4.16638	0	CLUST4	0	M1	0	FALSE
1453	CSNK1D	casein kinase 1 delta	0.5	0.5	0.5	2.48528	0.022	4.11954	0	CLUST2	0	M2	1	TRUE
5885	RAD21	RAD21 cohesin complex component	1	0	0.5	2.39405	0.02	4.06741	0	CLUST3	0	0	0	FALSE
55284	UBE2W	ubiquitin conjugating enzyme E2 W	0	1	0.5	2.19057	0.014	4.06104	0	CLUST11	0	M4	1	TRUE
57521	RPTOR	regulatory associated protein of MTOR complex 1	0	1	0	1.87606	0.007	4.04272	0	CLUST64	0	0	0	FALSE
10788	IQGAP2	IQ motif containing GTPase activating protein 2	0.5	0.5	1	1.45968	0.002	3.93964	0	CLUST4	0	M11	0	FALSE
4650	MYO9B	myosin IXB	1	0.5	0.5	1.75308	0.006	3.89507	0	CLUST32	0	0	0	FALSE
11275	KLHL2	kelch like family member 2	0	1	0.5	2.22789	0.018	3.88707	0	CLUST8	0	M17	0	TRUE
6597	SMARCA4	SWI/SNF related, matrix associated, actin dependent regulator of chromatin, subfamily a, member 4	1	0	0	1.98275	0.011	3.88342	0	CLUST2	0	M2	0	TRUE
9369	NRXN3	neurexin 3	1	0	0	1.8787	0.009	3.84336	0	CLUST13	0	M13	1	TRUE
2556	GABRA3	gamma-aminobutyric acid type A receptor alpha3 subunit	1	0	0	1.58106	0.004	3.79129	0	CLUST69	0	0	0	FALSE
10451	VAV3	vav guanine nucleotide exchange factor 3	0.5	0	1	2.14193	0.017	3.79025	0	CLUST4	0	M15	0	FALSE
27071	DAPP1	dual adaptor of phosphotyrosine and 3-phosphoinositides 1	1	0	0.5	1.75856	0.007	3.78951	0	0	0	0	0	FALSE
1445	CSK	C-terminal Src kinase	0.5	0.5	0	2.11245	0.017	3.73809	0	CLUST4	0	M5	0	FALSE
8912	CACNA1H	calcium voltage-gated channel subunit alpha1 H	1	0.5	0	1.68039	0.006	3.73357	0	CLUST2	0	M5	0	TRUE
54413	NLGN3	neuroligin 3	1	0	0	1.67981	0.006	3.73228	1	CLUST13	0	0	0	TRUE
7325	UBE2E2	ubiquitin conjugating enzyme E2 E2	0	1	0.5	2.1932	0.021	3.6797	0	CLUST11	0	M17	0	TRUE
8452	CUL3	cullin 3	1	0	0.5	2.23726	0.023	3.66524	0	CLUST5	ASD_ID_M1_Extended, ASD_without_ID_M1_Extended	M14	0	TRUE
861	RUNX1	runt related transcription factor 1	0	0.5	0.5	2.25884	0.024	3.65884	0	CLUST2	0	M18	0	TRUE
8720	MBTPS1	membrane bound transcription factor peptidase, site 1	0.5	0.5	0.5	2.06127	0.017	3.64752	0	CLUST6	0	0	0	FALSE
9616	RNF7	ring finger protein 7	0	1	0.5	2.26297	0.025	3.62542	0	CLUST5	0	0	0	FALSE
342371	ATXN1L	ataxin 1 like	0	1	0	1.68046	0.007	3.62122	0	CLUST2	0	0	0	TRUE
23332	CLASP1	cytoplasmic linker associated protein 1	1	0	0.5	2.25445	0.025	3.61176	0	0	0	0	0	FALSE
5868	RAB5A	RAB5A, member RAS oncogene family	0.5	0	1	2.30023	0.027	3.60822	0	CLUST25	0	M17	1	TRUE
9475	ROCK2	Rho associated coiled-coil containing protein kinase 2	0	0.5	1	1.91133	0.013	3.60488	0	CLUST83	0	0	0	FALSE
64398	MPP5	membrane palmitoylated protein 5	0	1	0.5	1.602	0.006	3.55939	0	0	0	M1	0	FALSE
6429	SRSF4	serine and arginine rich splicing factor 4	0.5	0.5	0.5	2.16666	0.023	3.54959	0	CLUST3	0	M3	0	TRUE
57502	NLGN4X	neuroligin 4 X-linked	1	0	0	1.6877	0.008	3.53895	0	CLUST13	0	M17	0	TRUE
1496	CTNNA2	catenin alpha 2	1	0.5	0	1.62097	0.007	3.49302	0	CLUST1	0	0	0	FALSE
4638	MYLK	myosin light chain kinase	0.5	1	0	1.84952	0.013	3.48831	0	CLUST4	0	0	0	FALSE
4644	MYO5A	myosin VA	1	0	1	1.80489	0.012	3.46687	0	CLUST13	0	M16	0	TRUE
23224	SYNE2	spectrin repeat containing nuclear envelope protein 2	0.5	1	0	1.76485	0.011	3.45664	0	CLUST5	0	M3	0	TRUE
22871	NLGN1	neuroligin 1	1	0	0	1.6877	0.009	3.45262	0	CLUST13	0	M5	0	TRUE
8924	HERC2	HECT and RLD domain containing E3 ubiquitin protein ligase 2	1	0	0.5	2.19219	0.027	3.43874	0	CLUST9	0	0	0	FALSE
5914	RARA	retinoic acid receptor alpha	0	1	0	1.98009	0.019	3.40823	0	CLUST2	0	0	0	TRUE
816	CAMK2B	calcium/calmodulin dependent protein kinase II beta	1	0	0	2.11349	0.025	3.38594	0	CLUST13	0	M17	0	TRUE
2562	GABRB3	gamma-aminobutyric acid type A receptor beta3 subunit	1	0.5	0	1.57103	0.007	3.38542	0	0	0	0	0	FALSE
54806	AHI1	Abelson helper integration site 1	1	0	0.5	1.9118	0.017	3.38303	0	CLUST7	0	M1	0	FALSE
5781	PTPN11	protein tyrosine phosphatase non-receptor type 11	1	0	0	2.37901	0.038	3.37871	0	CLUST4	0	0	0	FALSE
7248	TSC1	TSC complex subunit 1	1	0	0	1.7513	0.012	3.36393	0	CLUST5	0	0	0	FALSE
2035	EPB41	erythrocyte membrane protein band 4.1	0.5	0	1	1.45939	0.005	3.3581	0	CLUST3	ASD_with_ID_M1_Extended	0	0	TRUE
5252	PHF1	PHD finger protein 1	0.5	1	0	1.55661	0.007	3.35434	0	CLUST9	0	M12	0	FALSE
95681	CEP41	centrosomal protein 41	1	0	0.5	1.94644	0.019	3.3503	0	0	0	M3	0	TRUE
4306	NR3C2	nuclear receptor subfamily 3 group C member 2	1	0	0.5	1.5524	0.007	3.34527	0	CLUST2	0	M17	0	TRUE
4763	NF1	neurofibromin 1	1	0	0.5	1.84722	0.016	3.31738	0	CLUST2	0	0	0	TRUE
9126	SMC3	structural maintenance of chromosomes 3	1	0	0	2.04609	0.024	3.31423	0	CLUST56	ASD_ID_M1_Extended, ASD_with_ID_M1_Extended	M2	0	TRUE
91584	PLXNA4	plexin A4	1	0	0.5	1.60455	0.009	3.28252	0	0	0	0	0	FALSE
9378	NRXN1	neurexin 1	1	0	0	1.88039	0.018	3.28076	1	0	0	M16	1	TRUE
4854	NOTCH3	notch receptor 3	0.5	0.5	0	1.92991	0.02	3.27886	0	0	0	M8	0	FALSE
9229	DLGAP1	DLG associated protein 1	1	0	0	1.47531	0.006	3.27792	0	CLUST13	ASD_ID_M2_Extended, ASD_with_ID_M2_Extended	M16	0	TRUE
6197	RPS6KA3	ribosomal protein S6 kinase A3	1	0	0.5	1.51455	0.007	3.2637	0	0	ASD_ID_M2_Extended	0	0	TRUE
79718	TBL1XR1	transducin beta like 1 X-linked receptor 1	1	0	0	2.0106	0.024	3.25675	0	CLUST2	ASD_with_ID_M1_Extended	0	0	TRUE
3707	ITPKB	inositol-trisphosphate 3-kinase B	0	0.5	1	1.57187	0.009	3.21566	0	CLUST7	0	M1	0	FALSE
7204	TRIO	trio Rho guanine nucleotide exchange factor	1	0	1	1.93981	0.022	3.21538	0	CLUST4	0	M2	0	TRUE
122553	TRAPPC6B	trafficking protein particle complex 6B	1	0.5	0.5	1.85819	0.019	3.1984	0	CLUST1	0	M16	0	TRUE
9295	SRSF11	serine and arginine rich splicing factor 11	1	0	0.5	2.1395	0.032	3.19824	0	CLUST3	0	0	0	FALSE
4297	KMT2A	lysine methyltransferase 2A	1	0	0	1.92728	0.022	3.19462	0	CLUST2	ASD_without_ID_M1_Extended	M2	0	TRUE
389541	LAMTOR4	late endosomal/lysosomal adaptor, MAPK and MTOR activator 4	0	1	0	1.5566	0.009	3.18443	0	0	0	0	0	FALSE
50944	SHANK1	SH3 and multiple ankyrin repeat domains 1	1	0	0	1.47349	0.007	3.17523	0	0	0	0	0	FALSE
30011	SH3KBP1	SH3 domain containing kinase binding protein 1	0.5	0	1	2.04361	0.028	3.17341	0	CLUST4	0	0	0	FALSE
6256	RXRA	retinoid X receptor alpha	0	0.5	0.5	2.24686	0.039	3.16568	0	CLUST2	0	M1	0	TRUE
10142	AKAP9	A-kinase anchoring protein 9	1	0	0	2.16712	0.035	3.15517	0	CLUST14	0	M2	0	TRUE
8928	FOXH1	forkhead box H1	0	1	0	1.16851	0.002	3.15377	0	CLUST2	0	M17	0	TRUE
2904	GRIN2B	glutamate ionotropic receptor NMDA type subunit 2B	1	0	0	1.80051	0.018	3.14139	0	CLUST13	ASD_ID_M2_Extended, ASD_with_ID_M2_Extended	0	0	TRUE
4004	LMO1	LIM domain only 1	0	1	0.5	1.30771	0.004	3.1358	0	CLUST2	0	0	0	TRUE
22908	SACM1L	SAC1 like phosphatidylinositide phosphatase	0	1	0.5	1.60084	0.011	3.13542	0	CLUST1	0	0	0	FALSE
91687	CENPL	centromere protein L	0	0.5	1	1.95452	0.025	3.13125	0	CLUST7	0	M11	0	FALSE
815	CAMK2A	calcium/calmodulin dependent protein kinase II alpha	1	0	0	1.92273	0.024	3.11442	0	CLUST13	ASD_with_ID_M2_Extended	M13	0	TRUE
26053	AUTS2	activator of transcription and developmental regulator AUTS2	1	1	0	1.15094	0.002	3.10634	0	CLUST19	0	M3	0	TRUE
6595	SMARCA2	SWI/SNF related, matrix associated, actin dependent regulator of chromatin, subfamily a, member 2	1	0	0	1.57924	0.011	3.09311	1	CLUST2	0	0	1	TRUE
7994	KAT6A	lysine acetyltransferase 6A	1	0	0.5	1.63638	0.013	3.08631	0	CLUST2	0	M3	0	TRUE
2567	GABRG3	gamma-aminobutyric acid type A receptor gamma3 subunit	1	0	0	1.28238	0.004	3.07506	0	0	0	0	0	FALSE
3708	ITPR1	inositol 1,4,5-trisphosphate receptor type 1	0.5	0.5	0	1.89677	0.024	3.07237	1	CLUST55	0	M13	0	TRUE
5245	PHB	prohibitin	1	0.5	0.5	1.46478	0.008	3.0715	0	CLUST2	0	M9	0	TRUE
7812	CSDE1	cold shock domain containing E1	0.5	0.5	0.5	1.02376	0.001	3.07129	0	CLUST3	0	M5	0	FALSE
7337	UBE3A	ubiquitin protein ligase E3A	1	0	0	2.07313	0.035	3.01834	0	CLUST68	0	0	1	TRUE
9021	SOCS3	suppressor of cytokine signaling 3	0.5	0	1	2.13763	0.039	3.01178	0	CLUST4	0	0	0	FALSE
2266	FGG	fibrinogen gamma chain	0	1	0	2.11825	0.039	2.98447	0	CLUST6	0	0	0	FALSE
8655	DYNLL1	dynein light chain LC8-type 1	0.5	0.5	0	2.42797	0.06	2.96661	0	CLUST13	0	M9	0	TRUE
22854	NTNG1	netrin G1	1	1	0	1.65164	0.016	2.96614	0	0	0	0	0	FALSE
6009	RHEB	Ras homolog, mTORC1 binding	1	0	0	1.54014	0.012	2.95833	0	CLUST4	0	M4	0	FALSE
207	AKT1	AKT serine/threonine kinase 1	0	0.5	0.5	2.36239	0.056	2.95727	0	CLUST2	ASD_without_ID_M1_Extended	M3	0	TRUE
9612	NCOR2	nuclear receptor corepressor 2	0	0.5	0.5	2.04572	0.036	2.9534	0	CLUST2	0	0	0	TRUE
144165	PRICKLE1	prickle planar cell polarity protein 1	1	0.5	0	1.6145	0.015	2.94471	0	CLUST8	0	0	0	FALSE
53637	S1PR5	sphingosine-1-phosphate receptor 5	0	1	1	1.9514	0.031	2.94395	0	0	0	0	0	FALSE
23112	TNRC6B	trinucleotide repeat containing adaptor 6B	1	0	0	1.85398	0.026	2.93861	0	CLUST3	0	0	0	FALSE
29072	SETD2	SET domain containing 2, histone lysine methyltransferase	1	0	0	1.15808	0.003	2.9217	0	CLUST14	0	M2	0	TRUE
8243	SMC1A	structural maintenance of chromosomes 1A	1	0	0	2.02582	0.037	2.90057	0	CLUST56	0	M3	0	TRUE
2308	FOXO1	forkhead box O1	0	0.5	0.5	1.75377	0.023	2.87316	0	CLUST2	0	M18	0	TRUE
55008	HERC6	HECT and RLD domain containing E3 ubiquitin protein ligase family member 6	0	1	0	1.89999	0.031	2.8664	0	CLUST6	0	M8	0	FALSE
57680	CHD8	chromodomain helicase DNA binding protein 8	1	0	0.5	1.46318	0.011	2.8658	0	CLUST2	ASD_ID_M1_Extended, ASD_with_ID_M1_Extended, ASD_without_ID_M1_Extended	M5	0	TRUE
54620	FBXL19	F-box and leucine rich repeat protein 19	0	1	0	1.94613	0.034	2.85794	0	0	0	M2	0	TRUE
8289	ARID1A	AT-rich interaction domain 1A	0.5	0	0.5	1.64793	0.019	2.83649	0	CLUST2	0	M2	0	TRUE
673	BRAF	B-Raf proto-oncogene, serine/threonine kinase	1	0	0	1.91335	0.033	2.8346	0	CLUST4	0	0	0	FALSE
286	ANK1	ankyrin 1	0	0.5	0.5	1.7397	0.024	2.81794	0	0	0	0	0	FALSE
5928	RBBP4	RB binding protein 4, chromatin remodeling factor	0.5	0	0.5	2.23569	0.055	2.81616	0	CLUST2	0	M3	0	TRUE
10274	STAG1	stromal antigen 1	1	0	0	1.98692	0.039	2.79945	0	CLUST56	ASD_ID_M1_Extended, ASD_with_ID_M1_Extended	M3	0	TRUE
988	CDC5L	cell division cycle 5 like	0	0.5	0	2.9231	0.112	2.77923	0	CLUST3	0	M5	0	FALSE
9557	CHD1L	chromodomain helicase DNA binding protein 1 like	0.5	1	0	1.67463	0.022	2.77583	0	CLUST9	0	M1	1	TRUE
8408	ULK1	unc-51 like autophagy activating kinase 1	0.5	0.5	0	1.59053	0.018	2.77504	0	CLUST31	0	M2	0	TRUE
5253	PHF2	PHD finger protein 2	1	0	0.5	0.924063	0.001	2.77219	1	CLUST1	0	M2	0	TRUE
83593	RASSF5	Ras association domain family member 5	0	1	1	1.46816	0.013	2.76903	0	CLUST5	0	0	0	FALSE
5611	DNAJC3	DnaJ heat shock protein family (Hsp40) member C3	0	0.5	1	2.09533	0.048	2.76323	0	CLUST6	0	0	0	FALSE
7403	KDM6A	lysine demethylase 6A	1	0	0	1.73839	0.026	2.75539	0	CLUST2	0	M3	0	TRUE
652	BMP4	bone morphogenetic protein 4	0	1	0	1.79091	0.029	2.7537	0	CLUST21	0	M18	0	FALSE
26512	INTS6	integrator complex subunit 6	1	0	0.5	1.68033	0.023	2.75284	0	CLUST18	0	0	0	FALSE
1788	DNMT3A	DNA methyltransferase 3 alpha	1	0	0	1.63189	0.021	2.73795	0	CLUST2	0	M3	0	TRUE
6092	ROBO2	roundabout guidance receptor 2	1	0	0	1.39722	0.011	2.7366	0	CLUST2	0	M5	0	TRUE
54812	AFTPH	aftiphilin	0	1	0.5	1.56791	0.018	2.73557	0	CLUST68	0	0	0	FALSE
6427	SRSF2	serine and arginine rich splicing factor 2	0	1	0	1.90451	0.037	2.72687	0	CLUST3	0	0	0	FALSE
146330	FBXL16	F-box and leucine rich repeat protein 16	0	1	0	1.88583	0.036	2.72257	0	CLUST29	0	M13	0	TRUE
5364	PLXNB1	plexin B1	1	0	0	1.34495	0.01	2.6899	0	CLUST4	0	0	0	FALSE
10726	NUDC	nuclear distribution C, dynein complex regulator	0	1	0	1.79769	0.032	2.68728	0	CLUST3	0	M4	0	FALSE
23426	GRIP1	glutamate receptor interacting protein 1	1	0	0	1.34315	0.01	2.68629	0	CLUST2	0	M2	0	TRUE
146057	TTBK2	tau tubulin kinase 2	0	1	0	1.63613	0.023	2.68043	0	CLUST73	0	0	0	FALSE
777	CACNA1E	calcium voltage-gated channel subunit alpha1 E	1	0	0	1.46102	0.015	2.66477	0	0	0	0	0	FALSE
5982	RFC2	replication factor C subunit 2	0.5	0.5	0.5	1.93142	0.042	2.65908	0	CLUST9	0	M14	0	FALSE
51366	UBR5	ubiquitin protein ligase E3 component n-recognin 5	1	0	1	1.2974	0.009	2.65416	0	CLUST9	0	M3	0	TRUE
8379	MAD1L1	mitotic arrest deficient 1 like 1	0	1	0	1.78457	0.033	2.64382	0	CLUST8	0	M14	0	FALSE
774	CACNA1B	calcium voltage-gated channel subunit alpha1 B	0	1	0	1.47216	0.016	2.64382	1	CLUST33	0	0	1	TRUE
3690	ITGB3	integrin subunit beta 3	1	0	0	2.11175	0.056	2.64352	0	CLUST4	0	M2	0	TRUE
55898	UNC45A	unc-45 myosin chaperone A	0	1	0	1.18331	0.006	2.62913	0	0	0	M9	0	FALSE
805	CALM2	calmodulin 2	0	0.5	0	1.76462	0.033	2.61426	0	CLUST4	0	M4	0	FALSE
3628	INPP1	inositol polyphosphate-1-phosphatase	0	1	0	1.13501	0.005	2.6117	0	CLUST13	0	M17	0	TRUE
4952	OCRL	OCRL inositol polyphosphate-5-phosphatase	1	0	0	2.01571	0.051	2.60517	0	0	0	0	0	FALSE
161	AP2A2	adaptor related protein complex 2 subunit alpha 2	0	1	0	1.95876	0.047	2.60105	0	CLUST14	0	0	0	FALSE
1399	CRKL	CRK like proto-oncogene, adaptor protein	0.5	0	0.5	1.78586	0.035	2.6001	1	CLUST4	0	M3	1	TRUE
287	ANK2	ankyrin 2	1	0	0	1.73812	0.032	2.59824	0	0	0	M17	0	TRUE
4602	MYB	MYB proto-oncogene, transcription factor	0.5	0	0.5	1.70583	0.03	2.59778	0	CLUST2	0	0	0	TRUE
161882	ZFPM1	zinc finger protein, FOG family member 1	0	0.5	0.5	1.63786	0.026	2.59606	0	CLUST2	0	0	0	TRUE
56975	FAM20C	FAM20C golgi associated secretory pathway kinase	0	1	0	1.67662	0.029	2.57798	0	CLUST6	0	M2	0	TRUE
23020	SNRNP200	small nuclear ribonucleoprotein U5 subunit 200	0	1	0	1.89764	0.044	2.57424	0	CLUST3	0	M3	0	TRUE
6531	SLC6A3	solute carrier family 6 member 3	1	0	0	1.11873	0.005	2.57422	0	CLUST6	0	0	0	FALSE
527	ATP6V0C	ATPase H+ transporting V0 subunit c	0	1	0.5	1.90615	0.045	2.56718	0	0	0	M16	0	TRUE
23152	CIC	capicua transcriptional repressor	1	0	0	1.3807	0.014	2.55964	0	CLUST58	0	M6	0	FALSE
26046	LTN1	listerin E3 ubiquitin protein ligase 1	0	1	0	1.88595	0.044	2.55839	0	CLUST5	0	0	0	FALSE
8812	CCNK	cyclin K	1	0	0.5	1.74211	0.034	2.55833	0	CLUST8	0	0	0	FALSE
6812	STXBP1	syntaxin binding protein 1	1	0	0	1.37929	0.014	2.55703	0	CLUST23	ASD_ID_M2_Extended, ASD_with_ID_M2_Extended	M16	0	TRUE
23345	SYNE1	spectrin repeat containing nuclear envelope protein 1	1	0	0.5	1.5604	0.023	2.55636	0	0	0	M17	0	TRUE
7468	NSD2	nuclear receptor binding SET domain protein 2	0.5	1	0	1.62286	0.027	2.54568	0	CLUST2	0	M3	0	TRUE
2890	GRIA1	glutamate ionotropic receptor AMPA type subunit 1	1	0	0	1.76286	0.036	2.54504	0	CLUST13	0	0	0	TRUE
261734	NPHP4	nephrocystin 4	0	1	0	1.68498	0.031	2.54203	0	CLUST4	0	0	0	FALSE
775	CACNA1C	calcium voltage-gated channel subunit alpha1 C	1	0	0	1.72775	0.034	2.53723	0	CLUST6	0	M17	0	TRUE
5728	PTEN	phosphatase and tensin homolog	1	0	0	1.89632	0.046	2.53584	0	CLUST73	ASD_with_ID_M1_Extended	0	0	TRUE
776	CACNA1D	calcium voltage-gated channel subunit alpha1 D	1	0	0	1.64785	0.029	2.53374	0	0	0	0	0	FALSE
51196	PLCE1	phospholipase C epsilon 1	0	1	0	1.26385	0.01	2.52771	0	CLUST11	0	M8	0	FALSE
10458	BAIAP2	BAI1 associated protein 2	0.5	0.5	0	1.60472	0.027	2.51723	1	CLUST4	0	M17	0	TRUE
51429	SNX9	sorting nexin 9	0.5	0.5	0	1.78553	0.039	2.51569	0	CLUST14	0	M17	1	TRUE
55023	PHIP	pleckstrin homology domain interacting protein	1	0	0.5	1.13098	0.006	2.51286	0	CLUST5	0	M3	0	TRUE
3778	KCNMA1	potassium calcium-activated channel subfamily M alpha 1	0	1	0	1.28252	0.011	2.51196	0	0	ASD_ID_M2_Extended	0	0	TRUE
4233	MET	MET proto-oncogene, receptor tyrosine kinase	1	0	0	1.75916	0.038	2.49839	0	CLUST4	0	0	0	FALSE
10466	COG5	component of oligomeric golgi complex 5	0	1	0	1.75893	0.038	2.49806	0	0	0	M14	0	FALSE
23191	CYFIP1	cytoplasmic FMR1 interacting protein 1	1	0	0	1.8802	0.047	2.49672	1	CLUST3	0	0	1	TRUE
3785	KCNQ2	potassium voltage-gated channel subfamily Q member 2	1	0	0	1.29582	0.012	2.48904	0	0	0	0	0	FALSE
4924	NUCB1	nucleobindin 1	0	1	0	1.67792	0.033	2.48581	0	0	0	0	0	FALSE
94239	H2AFV	H2A histone family member V	0	0.5	0	1.98483	0.056	2.48463	0	CLUST2	0	M11	0	TRUE
84231	TRAF7	TNF receptor associated factor 7	1	0	0	1.71941	0.036	2.48231	0	CLUST11	0	M14	0	FALSE
6430	SRSF5	serine and arginine rich splicing factor 5	0	1	0	1.89465	0.049	2.48163	0	CLUST3	0	M12	0	FALSE
54509	RHOF	ras homolog family member F, filopodia associated	0.5	0	0.5	1.82589	0.044	2.4769	0	CLUST7	0	0	0	FALSE
6636	SNRPF	small nuclear ribonucleoprotein polypeptide F	0.5	0.5	0	1.97104	0.056	2.46738	0	CLUST3	0	0	0	FALSE
5718	PSMD12	proteasome 26S subunit, non-ATPase 12	1	0	0	1.86885	0.048	2.46456	0	CLUST6	0	M17	0	TRUE
4591	TRIM37	tripartite motif containing 37	0	1	0	1.85275	0.047	2.46027	0	CLUST8	0	M16	0	TRUE
10075	HUWE1	HECT, UBA and WWE domain containing 1, E3 ubiquitin protein ligase	1	0	0	1.773	0.041	2.45954	0	CLUST6	0	M2	0	TRUE
9969	MED13	mediator complex subunit 13	1	0	0	1.49853	0.023	2.455	0	CLUST20	0	M3	0	TRUE
6626	SNRPA	small nuclear ribonucleoprotein polypeptide A	0	1	0	1.75557	0.04	2.45418	0	CLUST3	0	M3	0	TRUE
5923	RASGRF1	Ras protein specific guanine nucleotide releasing factor 1	0	1	0	1.46204	0.021	2.45298	0	0	0	0	0	FALSE
5707	PSMD1	proteasome 26S subunit, non-ATPase 1	0	0.5	0.5	1.96369	0.057	2.44307	0	CLUST6	0	M16	0	TRUE
2902	GRIN1	glutamate ionotropic receptor NMDA type subunit 1	1	0	0	1.63333	0.032	2.44158	0	0	ASD_with_ID_M2_Extended	M17	0	TRUE
54883	CWC25	CWC25 spliceosome associated protein homolog	0	1	0	1.86895	0.05	2.43156	0	CLUST8	0	M2	0	TRUE
5715	PSMD9	proteasome 26S subunit, non-ATPase 9	0	1	0	1.89205	0.052	2.42939	0	CLUST2	0	M9	0	TRUE
29929	ALG6	ALG6 alpha-1,3-glucosyltransferase	1	0.5	0	1.04777	0.005	2.41096	0	0	0	0	0	FALSE
3211	HOXB1	homeobox B1	0	0.5	0.5	1.50318	0.025	2.40819	0	CLUST2	0	0	0	TRUE
6857	SYT1	synaptotagmin 1	1	0	0	1.84736	0.05	2.40347	0	CLUST23	ASD_ID_M2_Extended, ASD_with_ID_M2_Extended	M16	0	TRUE
3786	KCNQ3	potassium voltage-gated channel subfamily Q member 3	1	0	0	1.29582	0.014	2.40229	0	0	0	0	0	FALSE
80184	CEP290	centrosomal protein 290	1	0	0	1.79569	0.046	2.40128	0	0	0	M6	0	FALSE
9961	MVP	major vault protein	0.5	0.5	0.5	1.04331	0.005	2.40068	0	0	0	0	0	FALSE
55869	HDAC8	histone deacetylase 8	1	0	0	1.56012	0.029	2.39884	0	CLUST2	0	0	0	TRUE
3017	HIST1H2BD	histone cluster 1 H2B family member d	0	0.5	0	2.13227	0.076	2.38641	0	CLUST3	0	M3	0	TRUE
4915	NTRK2	neurotrophic receptor tyrosine kinase 2	1	0	0	1.50415	0.026	2.38413	0	CLUST4	0	0	0	FALSE
2811	GP1BA	glycoprotein Ib platelet subunit alpha	0	0.5	0.5	1.57474	0.031	2.37572	0	0	0	M12	0	FALSE
2113	ETS1	ETS proto-oncogene 1, transcription factor	0.5	0.5	0	1.35852	0.018	2.37025	0	CLUST2	0	M18	1	TRUE
9690	UBE3C	ubiquitin protein ligase E3C	1	0	0	1.73411	0.043	2.36971	0	CLUST6	0	0	0	FALSE
1387	CREBBP	CREB binding protein	0	0	1	2.30964	0.095	2.36109	0	CLUST2	ASD_ID_M1_Extended, ASD_with_ID_M1_Extended	M2	0	TRUE
3784	KCNQ1	potassium voltage-gated channel subfamily Q member 1	0	1	0	1.42277	0.022	2.35835	0	0	0	0	0	FALSE
3949	LDLR	low density lipoprotein receptor	0.5	0.5	0	1.71166	0.042	2.35654	0	CLUST4	0	0	0	FALSE
3480	IGF1R	insulin like growth factor 1 receptor	0	0.5	0.5	1.57577	0.032	2.35555	0	CLUST4	0	M2	0	TRUE
23135	KDM6B	lysine demethylase 6B	1	0	0.5	1.45379	0.024	2.35484	0	CLUST2	0	M2	0	TRUE
22897	CEP164	centrosomal protein 164	0.5	0.5	0	1.70991	0.042	2.35413	0	CLUST9	0	M12	0	FALSE
3912	LAMB1	laminin subunit beta 1	1	0	0	1.84042	0.053	2.34787	0	CLUST53	0	M18	0	FALSE
8831	SYNGAP1	synaptic Ras GTPase activating protein 1	1	0.5	0	1.11958	0.008	2.34765	0	CLUST13	ASD_ID_M2_Extended, ASD_with_ID_M2_Extended	0	1	TRUE
3065	HDAC1	histone deacetylase 1	0.5	0	0	2.23022	0.089	2.34309	0	CLUST2	0	M11	0	TRUE
4052	LTBP1	latent transforming growth factor beta binding protein 1	0.5	0.5	0	1.6192	0.036	2.33763	0	CLUST37	0	M8	0	FALSE
10664	CTCF	CCCTC-binding factor	1	0	0	1.56964	0.033	2.3254	0	CLUST2	ASD_with_ID_M1_Extended	M3	0	TRUE
80204	FBXO11	F-box protein 11	1	0	0	1.75973	0.048	2.32066	0	CLUST5	0	M2	0	TRUE
6599	SMARCC1	SWI/SNF related, matrix associated, actin dependent regulator of chromatin subfamily c member 1	0.5	0	0.5	1.5798	0.034	2.31996	0	CLUST2	ASD_ID_M1_Extended	M3	0	TRUE
1654	DDX3X	DEAD-box helicase 3 X-linked	1	0	1	1.00821	0.005	2.31993	0	CLUST3	0	0	0	FALSE
112399	EGLN3	egl-9 family hypoxia inducible factor 3	0	1	0	1.47864	0.027	2.31944	0	0	0	M11	0	FALSE
22839	DLGAP4	DLG associated protein 4	0	0.5	0.5	1.26905	0.015	2.31463	0	CLUST13	0	0	0	TRUE
23229	ARHGEF9	Cdc42 guanine nucleotide exchange factor 9	1	0	0	1.37881	0.021	2.31333	0	0	0	M16	0	TRUE
2274	FHL2	four and a half LIM domains 2	0.5	0.5	0	1.36028	0.02	2.31108	0	CLUST2	0	M13	0	TRUE
57498	KIDINS220	kinase D interacting substrate 220	0	0.5	1	1.10068	0.008	2.30802	0	CLUST15	0	M5	0	FALSE
3720	JARID2	jumonji and AT-rich interaction domain containing 2	1	0	0.5	1.37319	0.021	2.30391	0	CLUST2	0	0	0	TRUE
51132	RLIM	ring finger protein, LIM domain interacting	1	0	0	1.71941	0.046	2.29927	0	CLUST11	0	0	0	FALSE
5071	PRKN	parkin RBR E3 ubiquitin protein ligase	1	0	0	1.76622	0.05	2.2979	0	CLUST6	0	M16	1	TRUE
9820	CUL7	cullin 7	1	0	0	1.76906	0.051	2.28638	0	CLUST5	0	M3	0	TRUE
2580	GAK	cyclin G associated kinase	0.5	0.5	0	1.84382	0.058	2.28001	0	0	0	M9	0	FALSE
288	ANK3	ankyrin 3	1	0	0	1.73812	0.05	2.26135	0	CLUST4	0	0	0	FALSE
9218	VAPA	VAMP associated protein A	0.5	0	1	1.4115	0.025	2.26131	0	CLUST23	0	0	0	FALSE
5834	PYGB	glycogen phosphorylase B	0	1	0	1.69092	0.046	2.26117	0	0	0	0	0	FALSE
6497	SKI	SKI proto-oncogene	0	1	0	1.53235	0.034	2.25028	0	CLUST2	0	M2	1	TRUE
10243	GPHN	gephyrin	1	1	0	1.28676	0.018	2.24505	0	0	0	0	0	FALSE
10787	NCKAP1	NCK associated protein 1	1	0	0	1.47189	0.03	2.24151	0	CLUST3	ASD_ID_M1_Extended, ASD_without_ID_M1_Extended	M4	0	TRUE
23054	NCOA6	nuclear receptor coactivator 6	0.5	0	0.5	1.75671	0.053	2.24108	0	CLUST2	0	M2	0	TRUE
11070	TMEM115	transmembrane protein 115	0	1	0	1.49879	0.032	2.24047	0	CLUST1	0	0	0	FALSE

## Sheet: 4
cluster	GEN	EPI	TRA	cluster size	GEN_MOD	EPI_MOD	TRA_MOD	GEN_enrich	EPI_enrich	TRA_enrich	annotations
8	47	33	31	61	191	152	118	1.07304	0.946721	1.1456	All 3
3	40	27	25	53	191	152	118	1.05107	0.891509	1.06332	All 3
7	29	18	21	41	191	152	118	0.985059	0.768293	1.15461	TRA/GEN
12	14	13	10	25	191	152	118	0.779895	0.91	0.901695
5	13	16	12	21	191	152	118	0.862129	1.33333	1.28814	EPI/TRA
10	7	8	5	12	191	152	118	0.812391	1.16667	0.939266
9	6	7	3	10	191	152	118	0.835602	1.225	0.676271
1	5	7	3	10	191	152	118	0.696335	1.225	0.676271
11	9	2	2	10	191	152	118	1.2534	0.35	0.450847	GEN
6	4	8	2	9	191	152	118	0.618965	1.55556	0.500942	EPI
2	7	5	0	9	191	152	118	1.08319	0.972222	0	GEN/EPI
4	5	2	0	5	191	152	118	1.39267	0.7	0	GEN

## Sheet: 5
gsid	db_source	name	1	2	3	4	5	6	7	8	9	10	11	12
1269689	bs_reactome	mRNA Splicing	1	1	1	1	1.9236e-12	1	1	1	1	1	1	1
1269690	bs_reactome	mRNA Splicing - Major Pathway	1	1	1	1	1.9236e-12	1	1	1	1	1	1	1
1269688	bs_reactome	Processing of Capped Intron-Containing Pre-mRNA	1	1	1	1	1.74611e-11	1	1	1	1	1	1	1
124832	bs_kegg	Spliceosome	1	1	1	1	1.1715e-10	1	1	1	1	1	1	1
1269685	bs_reactome	RNA Polymerase II Transcription Termination	1	1	1	1	4.83213e-07	1	1	1	1	1	1	1
1269692	bs_reactome	mRNA 3'-end processing	1	1	1	1	1.39237e-05	1	1	1	1	1	1	1
1269694	bs_reactome	Transport of Mature mRNA derived from an Intron-Containing Transcript	1	1	1	1	3.00844e-05	1	1	1	1	1	1	1
1269675	bs_reactome	RNA Polymerase II Transcription	1	1	1	1	3.42529e-05	1	1	1	1	1	1	1
1269693	bs_reactome	Transport of Mature Transcript to Cytoplasm	1	1	1	1	4.72458e-05	1	1	1	1	1	1	1
1269691	bs_reactome	mRNA Splicing - Minor Pathway	1	1	1	1	0.013772	1	1	1	1	1	1	1
1268747	bs_reactome	Insulin processing	1	1	1	1	0.137767	1	1	1	1	1	1	1
1268763	bs_reactome	Neuronal System	1	0.000386452	4.26819e-08	0.000565798	1	1	1	1	1	1	1.04054e-13	1
1268855	bs_reactome	Diseases of signal transduction	0.000154695	1	5.46846e-05	1	1	1	1	1.00211e-05	0.0889706	1	1	1
1269460	bs_reactome	NGF signalling via TRKA from the plasma membrane	1.88252e-05	1	1.61592e-17	1	1	1	1	1	0.00880229	1	1	1
1269443	bs_reactome	Signalling by NGF	4.39477e-05	1	4.94122e-18	1	1	1	1	1	0.0166658	1	1	1
1269617	bs_reactome	Signaling by Type 1 Insulin-like Growth Factor 1 Receptor (IGF1R)	6.28126e-05	1	5.69802e-11	1	1	1	1	1	5.56103e-08	1	1	1
1269618	bs_reactome	IGF1R signaling cascade	6.28126e-05	1	5.69802e-11	1	1	1	1	1	5.56103e-08	1	1	1
1269284	bs_reactome	DAP12 signaling	1.88252e-05	1	1.25421e-15	1	1	1	1	1	0.0853191	1	1	1
1269431	bs_reactome	IRS-mediated signalling	6.28126e-05	1	6.03487e-10	1	1	1	1	1	5.56103e-08	1	1	1
1269429	bs_reactome	Insulin receptor signalling cascade	6.28126e-05	1	6.63824e-10	1	1	1	1	1	5.56103e-08	1	1	1
1269283	bs_reactome	DAP12 interactions	1.88252e-05	1	2.34899e-15	1	1	1	1	1	0.0889706	1	1	1
1269298	bs_reactome	Fc epsilon receptor (FCERI) signaling	1.88252e-05	1	2.90302e-15	1	1	1	1	1	0.089477	1	1	1
1269428	bs_reactome	Signaling by Insulin receptor	8.77076e-05	1	1.47977e-09	1	1	1	1	1	8.55123e-08	1	1	1
1269479	bs_reactome	Downstream signal transduction	1.88252e-05	1	1.37501e-14	1	1	1	1	1	0.0848378	1	1	1
1269478	bs_reactome	Signaling by PDGF	1.88252e-05	1	4.15158e-14	1	1	1	1	1	0.089477	1	1	1
946598	bs_kegg	Thyroid hormone signaling pathway	1	1	5.12009e-06	1	1	1	1	2.3195e-09	4.84909e-05	1	1	1
1269380	bs_reactome	Signaling by EGFR	1.88252e-05	1	3.62315e-13	1	1	1	1	1	0.0885829	1	1	1
1269487	bs_reactome	Signaling by SCF-KIT	1.88252e-05	1	1.33682e-12	1	1	1	1	1	0.081494	1	1	1
1268766	bs_reactome	Transmission across Chemical Synapses	1	6.03521e-05	2.76863e-09	9.91472e-05	1	1	1	1	1	1	1	1
1270312	bs_reactome	NCAM signaling for neurite out-growth	4.94851e-05	0.00360315	3.50805e-08	1	1	1	1	1	1	1	1	1
1270414	bs_reactome	Cellular responses to stress	0.00325425	1	1	1	1	1	1	0.00179379	2.06329e-08	1	1	1
377129	bs_kegg	GABAergic synapse	1	1.3753e-05	0.0235865	3.90194e-06	1	1	1	1	1	1	1	1
537443	bs_kegg	Retrograde endocannabinoid signaling	1	2.09839e-05	0.000444117	0.000441157	1	1	1	1	1	1	1	1
1269183	bs_reactome	Signaling by the B Cell Receptor (BCR)	0.000358965	1	1.01823e-06	1	1	1	1	1	0.0301387	1	1	1
213811	bs_kegg	Glutamatergic synapse	1	0.0013002	4.83122e-06	1	1	1	1	1	1	1	0.0147625	1
583255	bs_kegg	Nicotine addiction	1	0.0057246	0.00342097	5.26873e-05	1	1	1	1	1	1	1	1
1269185	bs_reactome	Downstream signaling events of B Cell Receptor (BCR)	0.00025635	1	0.00273396	1	1	1	1	1	0.0188055	1	1	1
1269594	bs_reactome	Signaling by Wnt	0.00116232	1	0.116054	1	1	1	1	0.000206382	1	1	1	1
552665	bs_kegg	Morphine addiction	1	0.0209335	0.0251905	0.000429302	1	1	1	1	1	1	1	1
PID_IFNG_PATHWAY	CP	PID_IFNG_PATHWAY	1	1	0.000220039	1	1	1	1	0.134944	0.0103709	1	1	1
523	bs_kegg	Prostate cancer	1	1	0.0027403	1	1	1	1	0.022345	0.0388868	1	1	1
PID_AR_PATHWAY	CP	PID_AR_PATHWAY	1	1	0.00860065	1	1	1	1	0.0321498	0.0165034	1	1	1
PID_FOXO_PATHWAY	CP	PID_FOXO_PATHWAY	1	1	0.0506597	1	1	1	1	0.00134078	0.141115	1	1	1
1270423	bs_reactome	HSF1-dependent transactivation	1	1	0.0422383	1	1	1	1	0.105876	0.00837458	1	1	1
1492886	bs_kegg	Apelin signaling pathway	1	0.0460129	0.0112435	1	1	1	1	1	0.0761454	1	1	1
529	bs_kegg	Acute myeloid leukemia	1	1	0.0735066	1	1	1	1	0.0564826	0.0228651	1	1	1
1269056	bs_reactome	Infectious disease	0.0298214	1	0.17962	1	1	1	1	1	1	0.0280012	1	1
PID_ANGIOPOIETIN_RECEPTOR_PATHWAY	CP	PID_ANGIOPOIETIN_RECEPTOR_PATHWAY	1	1	0.0520334	1	1	1	1	0.18065	0.141168	1	1	1
1269193	bs_reactome	Antigen processing: Ubiquitination & Proteasome degradation	0.0163251	1	1	1	1	1	1	1	1	1	1	5.36992e-30
1269192	bs_reactome	Class I MHC mediated antigen processing & presentation	0.026853	1	1	1	1	1	1	1	1	1	1	1.62236e-28
1269483	bs_reactome	VEGFA-VEGFR2 Pathway	9.49702e-05	1	5.40926e-23	1	1	1	1	1	1	1	1	1
1269480	bs_reactome	Signaling by VEGF	0.000104174	1	5.40926e-23	1	1	1	1	1	1	1	1	1
1427849	bs_reactome	Protein-protein interactions at synapses	1	1	0.0351937	1	1	1	1	1	1	1	1.25348e-20	1
1427850	bs_reactome	Interactions of neurexins and neuroligins at synapses	1	1	0.190936	1	1	1	1	1	1	1	2.43956e-21	1
459	bs_kegg	Calcium signaling pathway	1	4.88261e-12	6.49699e-08	1	1	1	1	1	1	1	1	1
1269323	bs_reactome	Interleukin-3, 5 and GM-CSF signaling	4.67137e-05	1	5.33086e-14	1	1	1	1	1	1	1	1	1
1269321	bs_reactome	Interleukin-2 signaling	4.47502e-05	1	5.87343e-13	1	1	1	1	1	1	1	1	1
469	bs_kegg	mTOR signaling pathway	1	1	0.00240396	1	1	1	1	1	1.32711e-14	1	1	1
1269299	bs_reactome	FCERI mediated MAPK activation	4.67137e-05	1	8.56286e-13	1	1	1	1	1	1	1	1	1
1427866	bs_reactome	RET signaling	4.67137e-05	1	8.56286e-13	1	1	1	1	1	1	1	1	1
1269485	bs_reactome	VEGFR2 mediated cell proliferation	4.39477e-05	1	7.48493e-12	1	1	1	1	1	1	1	1	1
PID_MTOR_4PATHWAY	CP	PID_MTOR_4PATHWAY	1	1	0.088742	1	1	1	1	1	5.434e-15	1	1	1
PID_SMAD2_3NUCLEAR_PATHWAY	CP	PID_SMAD2_3NUCLEAR_PATHWAY	1	1	1	1	1	1	1	7.73589e-15	0.173772	1	1	1
698773	bs_kegg	Circadian entrainment	1	3.311e-07	6.05113e-09	1	1	1	1	1	1	1	1	1
1269501	bs_reactome	MAPK family signaling cascades	6.12176e-05	1	3.89181e-11	1	1	1	1	1	1	1	1	1
1269469	bs_reactome	Prolonged ERK activation events	4.39477e-05	1	8.56337e-11	1	1	1	1	1	1	1	1	1
1269464	bs_reactome	Signalling to ERKs	4.47502e-05	1	1.45928e-10	1	1	1	1	1	1	1	1	1
1268786	bs_reactome	Neurotransmitter Receptor Binding And Downstream Transmission In The Postsynaptic Cell	1	1	8.92117e-10	3.04735e-05	1	1	1	1	1	1	1	1
1269471	bs_reactome	ARMS-mediated activation	4.39477e-05	1	9.64244e-10	1	1	1	1	1	1	1	1	1
1269470	bs_reactome	Frs2-mediated activation	4.39477e-05	1	9.79156e-10	1	1	1	1	1	1	1	1	1
1269502	bs_reactome	MAPK1/MAPK3 signaling	4.39477e-05	1	9.95264e-10	1	1	1	1	1	1	1	1	1
1269632	bs_reactome	Signaling by Leptin	4.39477e-05	1	1.06423e-09	1	1	1	1	1	1	1	1	1
1269322	bs_reactome	Interleukin receptor SHC signaling	4.39477e-05	1	1.13819e-09	1	1	1	1	1	1	1	1	1
469185	bs_kegg	Dopaminergic synapse	1	9.22026e-07	5.97796e-08	1	1	1	1	1	1	1	1	1
782000	bs_kegg	Proteoglycans in cancer	1	1	4.36955e-13	1	1	1	1	1	0.137756	1	1	1
456	bs_kegg	MAPK signaling pathway	1	4.47133e-07	1.1245e-06	1	1	1	1	1	0.205555	1	1	1
547607	bs_kegg	Amphetamine addiction	1	0.000314784	4.60211e-10	1	1	1	1	1	1	1	1	1
1319989	bs_kegg	Longevity regulating pathway	1	1	0.0240738	1	1	1	1	1	9.27169e-12	1	1	1
1269592	bs_reactome	Gastrin-CREB signalling pathway via PKC and MAPK	0.00025635	1	8.84031e-10	1	1	1	1	1	1	1	1	1
496	bs_kegg	Long-term potentiation	1	0.0147282	1.61461e-11	1	1	1	1	1	1	1	1	1
1269285	bs_reactome	RAF/MAP kinase cascade	4.39477e-05	1	9.87901e-09	1	1	1	1	1	1	1	1	1
1269468	bs_reactome	Signalling to p38 via RIT and RIN	4.39477e-05	1	1.1602e-08	1	1	1	1	1	1	1	1	1
1269465	bs_reactome	Signalling to RAS	4.39477e-05	1	1.55631e-08	1	1	1	1	1	1	1	1	1
468	bs_kegg	Autophagy - animal	1	1	0.00919413	1	1	1	1	1	9.46277e-11	1	1	1
501	bs_kegg	Insulin signaling pathway	1	1	0.0112435	1	1	1	1	1	1.29487e-10	1	1	1
217716	bs_kegg	Cholinergic synapse	1	2.6373e-05	3.10869e-07	1	1	1	1	1	1	1	1	1
952859	bs_kegg	Oxytocin signaling pathway	1	8.06981e-05	2.13928e-07	1	1	1	1	1	1	1	1	1
1311050	bs_kegg	Phospholipase D signaling pathway	1	1	2.00731e-05	1	1	1	1	1	2.34196e-06	1	1	1
1269826	bs_reactome	Separation of Sister Chromatids	0.00304136	1	1	1	1	1	1.73135e-08	1	1	1	1	1
96530	bs_kegg	Vascular smooth muscle contraction	1	0.00146189	3.83101e-08	1	1	1	1	1	1	1	1	1
497	bs_kegg	Long-term depression	1	0.0123348	4.59887e-09	1	1	1	1	1	1	1	1	1
1017634	bs_kegg	cAMP signaling pathway	1	0.00509482	1.28416e-08	1	1	1	1	1	1	1	1	1
1269825	bs_reactome	Mitotic Anaphase	0.00351941	1	1	1	1	1	2.28204e-08	1	1	1	1	1
1269823	bs_reactome	Mitotic Metaphase and Anaphase	0.00354918	1	1	1	1	1	2.28204e-08	1	1	1	1	1
1272485	bs_kegg	Aldosterone synthesis and secretion	1	1.20576e-05	1.03483e-05	1	1	1	1	1	1	1	1	1
PID_VEGFR1_2_PATHWAY	CP	PID_VEGFR1_2_PATHWAY	1	1	1.07234e-09	1	1	1	1	1	0.155533	1	1	1
BIOCARTA_VDR_PATHWAY	CP:BIOCARTA	BIOCARTA_VDR_PATHWAY	1	1	1	1	1	1	1	1.8365e-09	0.162758	1	1	1
PID_RETINOIC_ACID_PATHWAY	CP	PID_RETINOIC_ACID_PATHWAY	1	1	1	1	1	1	1	6.30038e-09	0.139182	1	1	1
502	bs_kegg	GnRH signaling pathway	1	0.000729961	1.26051e-06	1	1	1	1	1	1	1	1	1
83105	bs_kegg	Pathways in cancer	1	1	8.34081e-07	1	1	1	1	0.00148467	1	1	1	1
1269799	bs_reactome	G2/M Transition	0.00363758	1	1	1	1	1	4.49897e-07	1	1	1	1	1
1269797	bs_reactome	Mitotic G2-G2/M phases	0.00372703	1	1	1	1	1	4.49897e-07	1	1	1	1	1
458	bs_kegg	ErbB signaling pathway	1	1	4.94236e-08	1	1	1	1	1	0.0388868	1	1	1
1269654	bs_reactome	Transcriptional Regulation by TP53	1	1	1	1	1	1	1	0.0112762	1.93012e-07	1	1	1
1269810	bs_reactome	M Phase	0.0159946	1	1	1	1	1	2.44218e-07	1	1	1	1	1
522	bs_kegg	Glioma	1	1	1.43951e-07	1	1	1	1	1	0.0276403	1	1	1
SIG_PIP3_SIGNALING_IN_CARDIAC_MYOCTES	CP	SIG_PIP3_SIGNALING_IN_CARDIAC_MYOCTES	1	1	0.0849793	1	1	1	1	1	1.06709e-07	1	1	1
1059539	bs_kegg	Choline metabolism in cancer	1	1	0.0306309	1	1	1	1	1	3.84744e-07	1	1	1
525336	bs_kegg	Serotonergic synapse	1	2.6373e-05	0.000701789	1	1	1	1	1	1	1	1	1
100064	bs_kegg	Neurotrophin signaling pathway	1	1	4.5791e-07	1	1	1	1	1	0.059486	1	1	1
1269177	bs_reactome	Costimulation by the CD28 family	1	1	5.57181e-07	1	1	1	1	1	0.0619538	1	1	1
PID_TXA2PATHWAY	CP	PID_TXA2PATHWAY	1	1	2.46063e-07	1	1	1	1	1	0.148207	1	1	1
692234	bs_kegg	PI3K-Akt signaling pathway	1	1	0.0121912	1	1	1	1	1	3.17061e-06	1	1	1
BIOCARTA_CARM_ER_PATHWAY	CP:BIOCARTA	BIOCARTA_CARM_ER_PATHWAY	1	1	0.0340432	1	1	1	1	1.48117e-06	1	1	1	1
1270102	bs_reactome	Regulation of insulin secretion	1	1.53629e-06	0.0453626	1	1	1	1	1	1	1	1	1
481	bs_kegg	Adherens junction	1	1	5.1745e-06	1	1	1	1	0.0152677	1	1	1	1
1269178	bs_reactome	CD28 co-stimulation	1	1	6.08681e-06	1	1	1	1	1	0.0154705	1	1	1
1268726	bs_reactome	ER to Golgi Anterograde Transport	1	1	0.154272	1	1	1	6.21264e-07	1	1	1	1	1
PID_CXCR4_PATHWAY	CP	PID_CXCR4_PATHWAY	1	1	4.53029e-06	1	1	1	1	1	0.0380514	1	1	1
PID_ERBB1_DOWNSTREAM_PATHWAY	CP	PID_ERBB1_DOWNSTREAM_PATHWAY	1	1	6.69643e-05	1	1	1	1	1	0.00313048	1	1	1
519	bs_kegg	Renal cell carcinoma	1	1	3.26313e-06	1	1	1	1	0.0717696	1	1	1	1
777534	bs_kegg	Insulin secretion	1	0.0195513	1.24745e-05	1	1	1	1	1	1	1	1	1
PID_RAS_PATHWAY	CP	PID_RAS_PATHWAY	0.0596131	1	4.22877e-06	1	1	1	1	1	1	1	1	1
1269302	bs_reactome	Role of LAT2/NTAL/LAB on calcium mobilization	1	1	3.50617e-05	1	1	1	1	1	0.00837458	1	1	1
1402107	bs_kegg	EGFR tyrosine kinase inhibitor resistance	1	1	8.51721e-06	1	1	1	1	1	0.0359142	1	1	1
471	bs_kegg	Wnt signaling pathway	1	1	1.79062e-05	1	1	1	1	0.0183466	1	1	1	1
PID_MET_PATHWAY	CP	PID_MET_PATHWAY	1	1	0.000212053	1	1	1	1	1	0.00173286	1	1	1
1269507	bs_reactome	Signaling by Rho GTPases	1	1	3.86579e-06	1	1	1	0.0961962	1	1	1	1	1
1270101	bs_reactome	Integration of energy metabolism	1	4.06193e-06	0.100573	1	1	1	1	1	1	1	1	1
522987	bs_kegg	Transcriptional misregulation in cancer	1	1	0.0255803	1	1	1	1	2.08409e-05	1	1	1	1
1269610	bs_reactome	Beta-catenin independent WNT signaling	0.000125968	1	0.00540099	1	1	1	1	1	1	1	1	1
PID_FCER1_PATHWAY	CP	PID_FCER1_PATHWAY	1	1	4.53029e-06	1	1	1	1	1	0.152517	1	1	1
PID_TCR_PATHWAY	CP	PID_TCR_PATHWAY	1	1	5.59425e-06	1	1	1	1	1	0.152517	1	1	1
BIOCARTA_CREB_PATHWAY	CP:BIOCARTA	BIOCARTA_CREB_PATHWAY	1	1	5.59759e-06	1	1	1	1	1	0.162758	1	1	1
1269303	bs_reactome	C-type lectin receptors (CLRs)	0.00200189	1	0.00056516	1	1	1	1	1	1	1	1	1
1269172	bs_reactome	TCR signaling	6.28126e-05	1	0.0194926	1	1	1	1	1	1	1	1	1
983748	bs_kegg	cGMP-PKG signaling pathway	1	0.00317062	0.000420817	1	1	1	1	1	1	1	1	1
695200	bs_kegg	HIF-1 signaling pathway	1	1	3.11645e-05	1	1	1	1	1	0.0450701	1	1	1
1272486	bs_kegg	Insulin resistance	1	1	0.0360762	1	1	1	1	1	3.89648e-05	1	1	1
SIG_PIP3_SIGNALING_IN_B_LYMPHOCYTES	CP	SIG_PIP3_SIGNALING_IN_B_LYMPHOCYTES	1	1	0.000161939	1	1	1	1	1	0.0101114	1	1	1
1268879	bs_reactome	PI3K/AKT Signaling in Cancer	1	1	0.000657155	1	1	1	1	1	0.00335591	1	1	1
1269384	bs_reactome	GAB1 signalosome	1	1	0.000298785	1	1	1	1	1	0.00777104	1	1	1
BIOCARTA_PPARA_PATHWAY	CP:BIOCARTA	BIOCARTA_PPARA_PATHWAY	1	1	0.0110689	1	1	1	1	0.000290572	1	1	1	1
1222951	bs_kegg	Renin secretion	1	0.000295778	0.0111423	1	1	1	1	1	1	1	1	1
BIOCARTA_CARM1_PATHWAY	CP:BIOCARTA	BIOCARTA_CARM1_PATHWAY	1	1	0.170945	1	1	1	1	2.38261e-05	1	1	1	1
1340651	bs_kegg	Longevity regulating pathway - multiple species	1	1	0.00992111	1	1	1	1	1	0.000431329	1	1	1
1269309	bs_reactome	CD209 (DC-SIGN) signaling	1	1	4.23777e-05	1	1	1	1	0.101122	1	1	1	1
461	bs_kegg	Phosphatidylinositol signaling system	1	1	0.000389264	1	1	1	1	1	1	0.0110185	1	1
BIOCARTA_PITX2_PATHWAY	CP:BIOCARTA	BIOCARTA_PITX2_PATHWAY	1	1	0.1803	1	1	1	1	2.70968e-05	1	1	1	1
PID_PTP1B_PATHWAY	CP	PID_PTP1B_PATHWAY	1	1	3.83835e-05	1	1	1	1	1	0.141168	1	1	1
PID_CD8_TCR_PATHWAY	CP	PID_CD8_TCR_PATHWAY	1	1	3.96083e-05	1	1	1	1	1	0.141835	1	1	1
1269599	bs_reactome	TCF dependent signaling in response to WNT	0.00786583	1	1	1	1	1	1	0.00074704	1	1	1	1
504	bs_kegg	Melanogenesis	1	1	3.11645e-05	1	1	1	1	0.191982	1	1	1	1
1457782	bs_reactome	Signaling by RAS mutants	0.00740175	1	0.000976156	1	1	1	1	1	1	1	1	1
1269509	bs_reactome	RHO GTPase Effectors	1	1	0.000533534	1	1	1	0.0156874	1	1	1	1	1
PID_REG_GR_PATHWAY	CP	PID_REG_GR_PATHWAY	1	1	1	1	1	1	1	5.1543e-05	0.173772	1	1	1
1269179	bs_reactome	CD28 dependent PI3K/Akt signaling	1	1	0.00174509	1	1	1	1	1	0.00834498	1	1	1
PID_CDC42_PATHWAY	CP	PID_CDC42_PATHWAY	1	1	0.000126689	1	1	1	1	1	0.155898	1	1	1
1269188	bs_reactome	PIP3 activates AKT signaling	1	1	0.0027666	1	1	1	1	1	0.00777104	1	1	1
PID_RB_1PATHWAY	CP	PID_RB_1PATHWAY	1	1	0.0812387	1	1	1	1	0.000271465	1	1	1	1
1269473	bs_reactome	PI3K/AKT activation	1	1	0.00297584	1	1	1	1	1	0.00777104	1	1	1
PID_AVB3_INTEGRIN_PATHWAY	CP	PID_AVB3_INTEGRIN_PATHWAY	1	1	0.000161939	1	1	1	1	1	0.164823	1	1	1
BIOCARTA_IL7_PATHWAY	CP:BIOCARTA	BIOCARTA_IL7_PATHWAY	1	1	0.00060184	1	1	1	1	0.0453956	1	1	1	1
908257	bs_kegg	Adrenergic signaling in cardiomyocytes	1	0.00231748	0.0123757	1	1	1	1	1	1	1	1	1
ST_INTEGRIN_SIGNALING_PATHWAY	CP	ST_INTEGRIN_SIGNALING_PATHWAY	1	1	0.000220039	1	1	1	1	1	0.173772	1	1	1
ST_DIFFERENTIATION_PATHWAY_IN_PC12_CELLS	CP	ST_DIFFERENTIATION_PATHWAY_IN_PC12_CELLS	1	1	0.00387677	1	1	1	1	1	0.0103709	1	1	1
SIG_CHEMOTAXIS	CP	SIG_CHEMOTAXIS	1	1	0.00029218	1	1	1	1	1	0.140379	1	1	1
373890	bs_kegg	Synaptic vesicle cycle	1	0.000291517	1	1	1	1	1	1	1	0.141951	1	1
PID_HIF1_TFPATHWAY	CP	PID_HIF1_TFPATHWAY	1	1	1	1	1	1	1	0.00027174	0.152517	1	1	1
1269484	bs_reactome	VEGFR2 mediated vascular permeability	1	1	0.00346474	1	1	1	1	1	0.0123741	1	1	1
SIG_BCR_SIGNALING_PATHWAY	CP	SIG_BCR_SIGNALING_PATHWAY	1	1	0.000308733	1	1	1	1	1	0.140379	1	1	1
1269777	bs_reactome	S Phase	0.00149897	1	1	1	1	1	0.0332675	1	1	1	1	1
1427860	bs_reactome	Deubiquitination	0.0007754	1	1	1	1	1	1	0.0697309	1	1	1	1
1457781	bs_reactome	Oncogenic MAPK signaling	0.0159946	1	0.00388576	1	1	1	1	1	1	1	1	1
1339115	bs_reactome	Cardiac conduction	1	0.000386452	0.170919	1	1	1	1	1	1	1	1	1
PID_FGF_PATHWAY	CP	PID_FGF_PATHWAY	1	1	0.000572265	1	1	1	1	1	0.145068	1	1	1
1269100	bs_reactome	The role of Nef in HIV-1 replication and disease pathogenesis	1	1	0.00346474	1	1	1	1	1	1	0.0276786	1	1
1269506	bs_reactome	MAPK6/MAPK4 signaling	0.000564855	1	1	1	1	1	1	0.171419	1	1	1	1
1339117	bs_reactome	Phase 0 - rapid depolarisation	1	0.000703174	0.143541	1	1	1	1	1	1	1	1	1
1269868	bs_reactome	Muscle contraction	1	0.00121312	0.093335	1	1	1	1	1	1	1	1	1
528	bs_kegg	Chronic myeloid leukemia	1	1	0.00132023	1	1	1	1	0.0874219	1	1	1	1
SA_B_CELL_RECEPTOR_COMPLEXES	CP	SA_B_CELL_RECEPTOR_COMPLEXES	1	1	0.000872565	1	1	1	1	1	0.139182	1	1	1
658418	bs_kegg	Viral carcinogenesis	1	1	0.0355738	1	1	1	1	0.00343247	1	1	1	1
1270073	bs_reactome	PI Metabolism	0.0174516	1	1	1	1	1	1	1	1	0.00700944	1	1
PID_ENDOTHELIN_PATHWAY	CP	PID_ENDOTHELIN_PATHWAY	1	1	0.000872565	1	1	1	1	1	0.152517	1	1	1
1269615	bs_reactome	Ca2+ pathway	1	1	0.00203538	1	1	1	1	0.0697309	1	1	1	1
PID_VEGFR1_PATHWAY	CP	PID_VEGFR1_PATHWAY	1	1	0.00103273	1	1	1	1	1	0.139182	1	1	1
PID_BCR_5PATHWAY	CP	PID_BCR_5PATHWAY	1	1	0.000960422	1	1	1	1	1	0.152517	1	1	1
1402111	bs_kegg	Endocrine resistance	1	1	0.00352374	1	1	1	1	1	0.0427243	1	1	1
503	bs_kegg	Progesterone-mediated oocyte maturation	1	1	0.00352374	1	1	1	1	1	0.0427243	1	1	1
921162	bs_kegg	FoxO signaling pathway	1	1	0.00992111	1	1	1	1	0.0152677	1	1	1	1
BIOCARTA_EIF4_PATHWAY	CP:BIOCARTA	BIOCARTA_EIF4_PATHWAY	1	1	0.0191857	1	1	1	1	1	0.00822835	1	1	1
PID_IL8_CXCR1_PATHWAY	CP	PID_IL8_CXCR1_PATHWAY	1	1	0.00120337	1	1	1	1	1	0.139182	1	1	1
PID_REELIN_PATHWAY	CP	PID_REELIN_PATHWAY	1	1	0.00130786	1	1	1	1	1	0.139182	1	1	1
PID_HEDGEHOG_GLI_PATHWAY	CP	PID_HEDGEHOG_GLI_PATHWAY	1	1	1	1	1	1	1	0.00131811	0.140379	1	1	1
585563	bs_kegg	Alcoholism	1	1	0.0044637	1	1	1	1	0.0440642	1	1	1	1
PID_IGF1_PATHWAY	CP	PID_IGF1_PATHWAY	1	1	0.00141672	1	1	1	1	1	0.139182	1	1	1
116129	bs_kegg	Arrhythmogenic right ventricular cardiomyopathy (ARVC)	1	0.0163154	0.0135806	1	1	1	1	1	1	1	1	1
BIOCARTA_BAD_PATHWAY	CP:BIOCARTA	BIOCARTA_BAD_PATHWAY	1	1	0.00149402	1	1	1	1	1	0.162758	1	1	1
1269091	bs_reactome	Host Interactions of HIV factors	0.0016258	1	0.156413	1	1	1	1	1	1	1	1	1
BIOCARTA_EDG1_PATHWAY	CP:BIOCARTA	BIOCARTA_EDG1_PATHWAY	1	1	0.00160881	1	1	1	1	1	0.162758	1	1	1
PID_IL8_CXCR2_PATHWAY	CP	PID_IL8_CXCR2_PATHWAY	1	1	0.00193472	1	1	1	1	1	0.139182	1	1	1
SIG_REGULATION_OF_THE_ACTIN_CYTOSKELETON_BY_RHO_GTPASES	CP	SIG_REGULATION_OF_THE_ACTIN_CYTOSKELETON_BY_RHO_GTPASES	1	1	0.00206683	1	1	1	1	1	0.139182	1	1	1
PID_IL2_PI3K_PATHWAY	CP	PID_IL2_PI3K_PATHWAY	1	1	0.0295615	1	1	1	1	1	0.0101114	1	1	1
509	bs_kegg	Alzheimer's disease	1	0.00347085	0.108579	1	1	1	1	1	1	1	1	1
PID_P53_REGULATION_PATHWAY	CP	PID_P53_REGULATION_PATHWAY	1	1	1	1	1	1	1	0.00261557	0.151256	1	1	1
ST_B_CELL_ANTIGEN_RECEPTOR	CP	ST_B_CELL_ANTIGEN_RECEPTOR	1	1	0.00289716	1	1	1	1	1	0.139182	1	1	1
PID_AMB2_NEUTROPHILS_PATHWAY	CP	PID_AMB2_NEUTROPHILS_PATHWAY	1	1	0.00305792	1	1	1	1	1	0.139182	1	1	1
852705	bs_kegg	MicroRNAs in cancer	1	1	0.00701266	1	1	1	1	0.0612598	1	1	1	1
PID_ERBB2_ERBB3_PATHWAY	CP	PID_ERBB2_ERBB3_PATHWAY	1	1	0.0427679	1	1	1	1	1	0.0103709	1	1	1
PID_RXR_VDR_PATHWAY	CP	PID_RXR_VDR_PATHWAY	1	1	1	1	1	1	1	0.00330428	0.139182	1	1	1
PID_MYC_REPRESS_PATHWAY	CP	PID_MYC_REPRESS_PATHWAY	1	1	1	1	1	1	1	0.00318723	0.152517	1	1	1
BIOCARTA_GPCR_PATHWAY	CP:BIOCARTA	BIOCARTA_GPCR_PATHWAY	1	1	0.00338102	1	1	1	1	1	0.190029	1	1	1
462	bs_kegg	Neuroactive ligand-receptor interaction	1	1	0.0928409	0.00734535	1	1	1	1	1	1	1	1
373889	bs_kegg	HTLV-I infection	1	1	0.0731703	1	1	1	1	0.00972377	1	1	1	1
PID_TELOMERASE_PATHWAY	CP	PID_TELOMERASE_PATHWAY	1	1	1	1	1	1	1	0.040357	0.0180736	1	1	1
PID_KIT_PATHWAY	CP	PID_KIT_PATHWAY	1	1	0.00580959	1	1	1	1	1	0.141168	1	1	1
1144996	bs_kegg	Glucagon signaling pathway	1	1	0.00446285	1	1	1	1	0.19324	1	1	1	1
1435182	bs_kegg	Breast cancer	1	1	0.0123757	1	1	1	1	1	0.0794185	1	1	1
463	bs_kegg	Cell cycle	1	1	1	1	1	1	0.0168334	0.0612598	1	1	1	1
BIOCARTA_MEF2D_PATHWAY	CP:BIOCARTA	BIOCARTA_MEF2D_PATHWAY	1	1	0.0171101	1	1	1	1	0.064623	1	1	1	1
1026136	bs_kegg	Signaling pathways regulating pluripotency of stem cells	1	1	0.0690498	1	1	1	1	0.0175867	1	1	1	1
BIOCARTA_TRKA_PATHWAY	CP:BIOCARTA	BIOCARTA_TRKA_PATHWAY	1	1	0.00763995	1	1	1	1	1	0.162758	1	1	1
PID_IL4_2PATHWAY	CP	PID_IL4_2PATHWAY	1	1	0.0812387	1	1	1	1	1	0.0175561	1	1	1
1339121	bs_reactome	Ion homeostasis	1	0.0744636	0.0194265	1	1	1	1	1	1	1	1	1
PID_LYSOPHOSPHOLIPID_PATHWAY	CP	PID_LYSOPHOSPHOLIPID_PATHWAY	1	1	0.0102635	1	1	1	1	1	0.152517	1	1	1
BIOCARTA_PTDINS_PATHWAY	CP:BIOCARTA	BIOCARTA_PTDINS_PATHWAY	1	1	0.228253	1	1	1	1	1	0.162758	0.0441716	1	1
PID_ECADHERIN_KERATINOCYTE_PATHWAY	CP	PID_ECADHERIN_KERATINOCYTE_PATHWAY	1	1	0.0130403	1	1	1	1	1	0.139182	1	1	1
1269275	bs_reactome	LRR FLII-interacting protein 1 (LRRFIP1) activates type I IFN production	1	1	0.190936	1	1	1	1	0.0104972	1	1	1	1
585562	bs_kegg	Epstein-Barr virus infection	1	1	0.0360762	1	1	1	1	0.0612598	1	1	1	1
BIOCARTA_TEL_PATHWAY	CP:BIOCARTA	BIOCARTA_TEL_PATHWAY	1	1	0.0142192	1	1	1	1	1	0.162758	1	1	1
1059538	bs_kegg	Central carbon metabolism in cancer	1	1	0.0959266	1	1	1	1	1	0.0276403	1	1	1
1270075	bs_reactome	Synthesis of PIPs at the Golgi membrane	0.148718	1	1	1	1	1	1	1	1	0.0178921	1	1
1339119	bs_reactome	Phase 2 - plateau phase	1	0.0200049	1	1	1	1	0.137774	1	1	1	1	1
BIOCARTA_CHEMICAL_PATHWAY	CP:BIOCARTA	BIOCARTA_CHEMICAL_PATHWAY	1	1	0.0179368	1	1	1	1	1	0.162758	1	1	1
BIOCARTA_IGF1R_PATHWAY	CP:BIOCARTA	BIOCARTA_IGF1R_PATHWAY	1	1	0.0187592	1	1	1	1	1	0.162758	1	1	1
PID_HDAC_CLASSII_PATHWAY	CP	PID_HDAC_CLASSII_PATHWAY	1	1	0.0295615	1	1	1	1	0.106175	1	1	1	1
PID_S1P_S1P3_PATHWAY	CP	PID_S1P_S1P3_PATHWAY	1	1	0.0243072	1	1	1	1	1	0.139182	1	1	1
524	bs_kegg	Thyroid cancer	1	1	0.0251905	1	1	1	1	0.135194	1	1	1	1
121285	bs_kegg	Dilated cardiomyopathy	1	0.0209335	0.165804	1	1	1	1	1	1	1	1	1
PID_NEPHRIN_NEPH1_PATHWAY	CP	PID_NEPHRIN_NEPH1_PATHWAY	1	1	0.0264882	1	1	1	1	1	0.139182	1	1	1
ST_G_ALPHA_I_PATHWAY	CP	ST_G_ALPHA_I_PATHWAY	1	1	0.0300519	1	1	1	1	1	0.139182	1	1	1
ST_ADRENERGIC	CP	ST_ADRENERGIC	1	1	0.0313286	1	1	1	1	1	0.139182	1	1	1
BIOCARTA_HDAC_PATHWAY	CP:BIOCARTA	BIOCARTA_HDAC_PATHWAY	1	1	0.027055	1	1	1	1	1	0.174167	1	1	1
PID_FAS_PATHWAY	CP	PID_FAS_PATHWAY	1	1	0.034334	1	1	1	1	1	0.139182	1	1	1
PID_ECADHERIN_NASCENT_AJ_PATHWAY	CP	PID_ECADHERIN_NASCENT_AJ_PATHWAY	1	1	0.035203	1	1	1	1	1	0.139182	1	1	1
PID_ER_NONGENOMIC_PATHWAY	CP	PID_ER_NONGENOMIC_PATHWAY	1	1	0.038278	1	1	1	1	1	0.139182	1	1	1
PID_A6B1_A6B4_INTEGRIN_PATHWAY	CP	PID_A6B1_A6B4_INTEGRIN_PATHWAY	1	1	0.0454626	1	1	1	1	1	0.140379	1	1	1
1270053	bs_reactome	Phospholipid metabolism	0.111455	1	1	1	1	1	1	1	1	0.0643882	1	1
BIOCARTA_IL2RB_PATHWAY	CP:BIOCARTA	BIOCARTA_IL2RB_PATHWAY	1	1	0.0385959	1	1	1	1	1	0.199658	1	1	1
488	bs_kegg	Jak-STAT signaling pathway	1	1	0.0898004	1	1	1	1	1	0.0859154	1	1	1
1457780	bs_reactome	Neutrophil degranulation	0.0574731	1	1	1	1	1	0.165688	1	1	1	1	1
BIOCARTA_P53HYPOXIA_PATHWAY	CP:BIOCARTA	BIOCARTA_P53HYPOXIA_PATHWAY	1	1	1	1	1	1	1	0.0725421	0.162758	1	1	1
SA_PTEN_PATHWAY	CP	SA_PTEN_PATHWAY	1	1	0.174652	1	1	1	1	1	0.139182	1	1	1
512	bs_kegg	Huntington's disease	1	1	0.143154	1	1	1	1	0.19324	1	1	1	1
BIOCARTA_LONGEVITY_PATHWAY	CP:BIOCARTA	BIOCARTA_LONGEVITY_PATHWAY	1	1	0.1803	1	1	1	1	1	0.162758	1	1	1
BIOCARTA_ACH_PATHWAY	CP:BIOCARTA	BIOCARTA_ACH_PATHWAY	1	1	0.184355	1	1	1	1	1	0.162758	1	1	1
BIOCARTA_ERK5_PATHWAY	CP:BIOCARTA	BIOCARTA_ERK5_PATHWAY	1	1	0.198718	1	1	1	1	1	0.162758	1	1	1
1270433	bs_reactome	Chromatin organization	1	1	1	1	1	1	1	1.26972e-27	1	1	1	1
466	bs_kegg	Ubiquitin mediated proteolysis	1	1	1	1	1	1	1	1	1	1	1	2.08766e-19
1339139	bs_reactome	Activation of HOX genes during differentiation	1	1	1	1	1	1	1	3.62453e-16	1	1	1	1
PID_HDAC_CLASSI_PATHWAY	CP	PID_HDAC_CLASSI_PATHWAY	1	1	1	1	1	1	1	7.50295e-16	1	1	1	1
1269434	bs_reactome	PKB-mediated events	1	1	1	1	1	1	1	1	1.79475e-13	1	1	1
1269436	bs_reactome	mTOR signalling	1	1	1	1	1	1	1	1	1.79475e-13	1	1	1
989139	bs_kegg	AMPK signaling pathway	1	1	1	1	1	1	1	1	4.28394e-13	1	1	1
478	bs_kegg	Focal adhesion	1	1	4.36955e-13	1	1	1	1	1	1	1	1	1
1270432	bs_reactome	Macroautophagy	1	1	1	1	1	1	1	1	4.60349e-12	1	1	1
1269439	bs_reactome	Energy dependent regulation of mTOR by LKB1-AMPK	1	1	1	1	1	1	1	1	4.7921e-12	1	1	1
1269432	bs_reactome	PI3K Cascade	1	1	1	1	1	1	1	1	1.00625e-11	1	1	1
1269655	bs_reactome	TP53 Regulates Metabolic Genes	1	1	1	1	1	1	1	1	1.30154e-11	1	1	1
1268847	bs_reactome	Anchoring of the basal body to the plasma membrane	1	1	1	1	1	1	1.49061e-11	1	1	1	1	1
1269530	bs_reactome	Signaling by NOTCH	1	1	1	1	1	1	1	7.62219e-11	1	1	1	1
1427858	bs_reactome	Clathrin-mediated endocytosis	1	1	1	1	1	1	1	1	1	1.00454e-10	1	1
500	bs_kegg	Regulation of actin cytoskeleton	1	1	2.24459e-10	1	1	1	1	1	1	1	1	1
1270029	bs_reactome	Regulation of lipid metabolism by Peroxisome proliferator-activated receptor alpha (PPARalpha)	1	1	1	1	1	1	1	2.36577e-10	1	1	1	1
1268798	bs_reactome	Activation of NMDA receptor upon glutamate binding and postsynaptic events	1	1	2.92099e-10	1	1	1	1	1	1	1	1	1
1269537	bs_reactome	NOTCH1 Intracellular Domain Regulates Transcription	1	1	1	1	1	1	1	2.99848e-10	1	1	1	1
1269350	bs_reactome	Platelet activation, signaling and aggregation	1	1	3.42925e-10	1	1	1	1	1	1	1	1	1
476	bs_kegg	Axon guidance	1	1	3.7328e-10	1	1	1	1	1	1	1	1	1
1269821	bs_reactome	Resolution of Sister Chromatid Cohesion	1	1	1	1	1	1	5.02848e-10	1	1	1	1	1
1269820	bs_reactome	Mitotic Prometaphase	1	1	1	1	1	1	7.19459e-10	1	1	1	1	1
PID_PDGFRB_PATHWAY	CP	PID_PDGFRB_PATHWAY	1	1	9.90352e-10	1	1	1	1	1	1	1	1	1
1269829	bs_reactome	Mitotic Telophase/Cytokinesis	1	1	1	1	1	1	1.34242e-09	1	1	1	1	1
1268883	bs_reactome	Signaling by NOTCH1 in Cancer	1	1	1	1	1	1	1	1.52913e-09	1	1	1	1
1269357	bs_reactome	GPVI-mediated activation cascade	1	1	1.97556e-09	1	1	1	1	1	1	1	1	1
868086	bs_kegg	Rap1 signaling pathway	1	1	2.28461e-09	1	1	1	1	1	1	1	1	1
1268846	bs_reactome	Cilium Assembly	1	1	1	1	1	1	4.21281e-09	1	1	1	1	1
868085	bs_kegg	Ras signaling pathway	1	1	4.59887e-09	1	1	1	1	1	1	1	1	1
1268814	bs_reactome	GABA A receptor activation	1	1	1	4.70731e-09	1	1	1	1	1	1	1	1
1268800	bs_reactome	Post NMDA receptor activation events	1	1	5.37118e-09	1	1	1	1	1	1	1	1	1
490	bs_kegg	Natural killer cell mediated cytotoxicity	1	1	5.37535e-09	1	1	1	1	1	1	1	1	1
1269279	bs_reactome	Fcgamma receptor (FCGR) dependent phagocytosis	1	1	6.40434e-09	1	1	1	1	1	1	1	1	1
PID_AR_TF_PATHWAY	CP	PID_AR_TF_PATHWAY	1	1	1	1	1	1	1	8.04327e-09	1	1	1	1
1269873	bs_reactome	RORA activates gene expression	1	1	1	1	1	1	1	9.1449e-09	1	1	1	1
PID_CMYB_PATHWAY	CP	PID_CMYB_PATHWAY	1	1	1	1	1	1	1	9.97077e-09	1	1	1	1
1269535	bs_reactome	Signaling by NOTCH1	1	1	1	1	1	1	1	1.12206e-08	1	1	1	1
506	bs_kegg	Type II diabetes mellitus	1	1.12851e-08	1	1	1	1	1	1	1	1	1	1
1269808	bs_reactome	Loss of proteins required for interphase microtubule organization from the centrosome	1	1	1	1	1	1	1.38417e-08	1	1	1	1	1
1383018	bs_reactome	AURKA Activation by TPX2	1	1	1	1	1	1	1.66079e-08	1	1	1	1	1
1269734	bs_reactome	Epigenetic regulation of gene expression	1	1	1	1	1	1	1	1.95003e-08	1	1	1	1
1269830	bs_reactome	Cohesin Loading onto Chromatin	1	1	1	1	1	1	1.96191e-08	1	1	1	1	1
1269805	bs_reactome	Centrosome maturation	1	1	1	1	1	1	2.28204e-08	1	1	1	1	1
494	bs_kegg	Leukocyte transendothelial migration	1	1	2.41961e-08	1	1	1	1	1	1	1	1	1
1269375	bs_reactome	PECAM1 interactions	1	1	2.80495e-08	1	1	1	1	1	1	1	1	1
1269803	bs_reactome	Regulation of PLK1 Activity at G2/M Transition	1	1	1	1	1	1	3.96864e-08	1	1	1	1	1
1270030	bs_reactome	PPARA activates gene expression	1	1	1	1	1	1	1	4.1219e-08	1	1	1	1
1270345	bs_reactome	Transcriptional regulation of white adipocyte differentiation	1	1	1	1	1	1	1	4.1219e-08	1	1	1	1
952858	bs_kegg	Platelet activation	1	1	4.13917e-08	1	1	1	1	1	1	1	1	1
1269952	bs_reactome	Ligand-gated ion channel transport	1	1	1	4.91726e-08	1	1	1	1	1	1	1	1
1268801	bs_reactome	CREB phosphorylation through the activation of Ras	1	1	5.61603e-08	1	1	1	1	1	1	1	1	1
PID_HDAC_CLASSIII_PATHWAY	CP	PID_HDAC_CLASSIII_PATHWAY	1	1	1	1	1	1	1	6.44059e-08	1	1	1	1
PID_E2F_PATHWAY	CP	PID_E2F_PATHWAY	1	1	1	1	1	1	1	7.22941e-08	1	1	1	1
PID_HES_HEY_PATHWAY	CP	PID_HES_HEY_PATHWAY	1	1	1	1	1	1	1	7.99168e-08	1	1	1	1
BIOCARTA_BIOPEPTIDES_PATHWAY	CP:BIOCARTA	BIOCARTA_BIOPEPTIDES_PATHWAY	1	1	8.9175e-08	1	1	1	1	1	1	1	1	1
1268794	bs_reactome	Glutamate Binding, Activation of AMPA Receptors and Synaptic Plasticity	1	1	1.03764e-07	1	1	1	1	1	1	1	1	1
1269438	bs_reactome	mTORC1-mediated signalling	1	1	1	1	1	1	1	1	1.87109e-07	1	1	1
1268799	bs_reactome	Unblocking of NMDA receptor, glutamate binding and activation	1	1	1.92285e-07	1	1	1	1	1	1	1	1	1
PID_ALPHA_SYNUCLEIN_PATHWAY	CP	PID_ALPHA_SYNUCLEIN_PATHWAY	1	1	2.46063e-07	1	1	1	1	1	1	1	1	1
1270010	bs_reactome	Fatty acid, triacylglycerol, and ketone body metabolism	1	1	1	1	1	1	1	2.56951e-07	1	1	1	1
1269324	bs_reactome	Regulation of signaling by CBL	1	1	2.59758e-07	1	1	1	1	1	1	1	1	1
1269872	bs_reactome	BMAL1:CLOCK,NPAS2 activates circadian gene expression	1	1	1	1	1	1	1	2.84258e-07	1	1	1	1
1268802	bs_reactome	Ras activation uopn Ca2+ infux through NMDA receptor	1	1	3.44101e-07	1	1	1	1	1	1	1	1	1
1270439	bs_reactome	RMTs methylate histone arginines	1	1	1	1	1	1	1	3.55006e-07	1	1	1	1
BIOCARTA_MTOR_PATHWAY	CP:BIOCARTA	BIOCARTA_MTOR_PATHWAY	1	1	1	1	1	1	1	1	3.65283e-07	1	1	1
154383	bs_kegg	Gastric acid secretion	1	1	3.83604e-07	1	1	1	1	1	1	1	1	1
1339109	bs_reactome	COPI-mediated anterograde transport	1	1	1	1	1	1	4.49897e-07	1	1	1	1	1
1269532	bs_reactome	Pre-NOTCH Transcription and Translation	1	1	1	1	1	1	1	4.90077e-07	1	1	1	1
1268838	bs_reactome	Organelle biogenesis and maintenance	1	1	1	1	1	1	5.32358e-07	1	1	1	1	1
1268725	bs_reactome	Transport to the Golgi and subsequent modification	1	1	0.232259	1	1	1	2.91345e-06	1	1	1	1	1
1268813	bs_reactome	GABA receptor activation	1	1	1	8.03858e-07	1	1	1	1	1	1	1	1
96864	bs_kegg	Chemokine signaling pathway	1	1	8.07024e-07	1	1	1	1	1	1	1	1	1
1269602	bs_reactome	Formation of the beta-catenin:TCF transactivating complex	1	1	1	1	1	1	1	1.05605e-06	1	1	1	1
1270436	bs_reactome	HDACs deacetylate histones	1	1	1	1	1	1	1	1.17983e-06	1	1	1	1
106590	bs_kegg	Fc gamma R-mediated phagocytosis	1	1	1.21157e-06	1	1	1	1	1	1	1	1	1
1269290	bs_reactome	Regulation of RAS by GAPs	1.54437e-06	1	1	1	1	1	1	1	1	1	1	1
948277	bs_kegg	Inflammatory mediator regulation of TRP channels	1	1	1.75657e-06	1	1	1	1	1	1	1	1	1
PID_AJDISS_2PATHWAY	CP	PID_AJDISS_2PATHWAY	1	1	1.96875e-06	1	1	1	1	1	1	1	1	1
PID_PI3KCI_PATHWAY	CP	PID_PI3KCI_PATHWAY	1	1	1.96875e-06	1	1	1	1	1	1	1	1	1
1270325	bs_reactome	Interaction between L1 and Ankyrins	1	1	1	1	1	1	2.60388e-06	1	1	1	1	1
PID_BETA_CATENIN_NUC_PATHWAY	CP	PID_BETA_CATENIN_NUC_PATHWAY	1	1	1	1	1	1	1	2.72093e-06	1	1	1	1
BIOCARTA_NOS1_PATHWAY	CP:BIOCARTA	BIOCARTA_NOS1_PATHWAY	1	1	2.78229e-06	1	1	1	1	1	1	1	1	1
PID_LKB1_PATHWAY	CP	PID_LKB1_PATHWAY	1	1	1	1	1	1	1	1	2.80011e-06	1	1	1
1269793	bs_reactome	Establishment of Sister Chromatid Cohesion	1	1	1	1	1	1	2.9466e-06	1	1	1	1	1
1270330	bs_reactome	EPH-Ephrin signaling	1	1	3.38594e-06	1	1	1	1	1	1	1	1	1
1269871	bs_reactome	Circadian Clock	1	1	1	1	1	1	1	3.40403e-06	1	1	1	1
PID_IL2_1PATHWAY	CP	PID_IL2_1PATHWAY	1	1	3.43244e-06	1	1	1	1	1	1	1	1	1
493	bs_kegg	Fc epsilon RI signaling pathway	1	1	4.14495e-06	1	1	1	1	1	1	1	1	1
PID_AVB3_OPN_PATHWAY	CP	PID_AVB3_OPN_PATHWAY	1	1	4.4677e-06	1	1	1	1	1	1	1	1	1
492	bs_kegg	B cell receptor signaling pathway	1	1	5.04673e-06	1	1	1	1	1	1	1	1	1
1269529	bs_reactome	Downregulation of SMAD2/3:SMAD4 transcriptional activity	1	1	1	1	1	1	1	5.10147e-06	1	1	1	1
1144995	bs_kegg	Sphingolipid signaling pathway	1	1	5.43314e-06	1	1	1	1	1	1	1	1	1
PID_EPHA_FWDPATHWAY	CP	PID_EPHA_FWDPATHWAY	1	1	5.43591e-06	1	1	1	1	1	1	1	1	1
1269531	bs_reactome	Pre-NOTCH Expression and Processing	1	1	1	1	1	1	1	6.24069e-06	1	1	1	1
PID_GMCSF_PATHWAY	CP	PID_GMCSF_PATHWAY	1	1	7.2305e-06	1	1	1	1	1	1	1	1	1
PID_NOTCH_PATHWAY	CP	PID_NOTCH_PATHWAY	1	1	1	1	1	1	1	8.66709e-06	1	1	1	1
1270304	bs_reactome	Semaphorin interactions	1	1	9.31813e-06	1	1	1	1	1	1	1	1	1
1269867	bs_reactome	Meiotic synapsis	1	1	1	1	1	1	1.20232e-05	1	1	1	1	1
1269488	bs_reactome	Regulation of KIT signaling	1	1	1.23026e-05	1	1	1	1	1	1	1	1	1
PID_ERA_GENOMIC_PATHWAY	CP	PID_ERA_GENOMIC_PATHWAY	1	1	1	1	1	1	1	1.287e-05	1	1	1	1
1269653	bs_reactome	YAP1- and WWTR1 (TAZ)-stimulated gene expression	1	1	1	1	1	1	1	1.52106e-05	1	1	1	1
1268796	bs_reactome	Trafficking of GluR2-containing AMPA receptors	1	1	1.54758e-05	1	1	1	1	1	1	1	1	1
1268805	bs_reactome	CREB phosphorylation through the activation of CaMKII	1	1	1.54758e-05	1	1	1	1	1	1	1	1	1
480	bs_kegg	Cell adhesion molecules (CAMs)	1	1	1	1	1	1	1	1	1	1	1.58375e-05	1
473	bs_kegg	Notch signaling pathway	1	1	1	1	1	1	1	1.81457e-05	1	1	1	1
1269612	bs_reactome	Asymmetric localization of PCP proteins	1.88252e-05	1	1	1	1	1	1	1	1	1	1	1
1270418	bs_reactome	Oxygen-dependent proline hydroxylation of Hypoxia-inducible Factor Alpha	1.88252e-05	1	1	1	1	1	1	1	1	1	1	1
1270332	bs_reactome	EPHB-mediated forward signaling	1	1	1.93797e-05	1	1	1	1	1	1	1	1	1
1383083	bs_reactome	Regulation of TP53 Activity through Acetylation	1	1	1	1	1	1	1	2.06645e-05	1	1	1	1
1269184	bs_reactome	Antigen activates B Cell Receptor (BCR) leading to generation of second messengers	1	1	2.41693e-05	1	1	1	1	1	1	1	1	1
BIOCARTA_RARRXR_PATHWAY	CP:BIOCARTA	BIOCARTA_RARRXR_PATHWAY	1	1	1	1	1	1	1	2.70968e-05	1	1	1	1
1270415	bs_reactome	Cellular response to hypoxia	3.03524e-05	1	1	1	1	1	1	1	1	1	1	1
1268767	bs_reactome	Depolarization of the Presynaptic Terminal Triggers the Opening of Calcium Channels	1	3.34738e-05	1	1	1	1	1	1	1	1	1	1
1269579	bs_reactome	G alpha (12/13) signalling events	1	1	4.09749e-05	1	1	1	1	1	1	1	1	1
1269181	bs_reactome	CTLA4 inhibitory signaling	1	1	4.23777e-05	1	1	1	1	1	1	1	1	1
1269176	bs_reactome	Downstream TCR signaling	4.39477e-05	1	1	1	1	1	1	1	1	1	1	1
1269611	bs_reactome	PCP/CE pathway	4.39477e-05	1	1	1	1	1	1	1	1	1	1	1
1339125	bs_reactome	Positive epigenetic regulation of rRNA expression	1	1	1	1	1	1	1	4.96599e-05	1	1	1	1
1268881	bs_reactome	Constitutive Signaling by AKT1 E17K in Cancer	1	1	1	1	1	1	1	1	7.64878e-05	1	1	1
1269101	bs_reactome	Nef and signal transduction	1	1	8.34232e-05	1	1	1	1	1	1	1	1	1
1269735	bs_reactome	PRC2 methylates histones and DNA	1	1	1	1	1	1	1	8.43935e-05	1	1	1	1
PID_EPHRINB_REV_PATHWAY	CP	PID_EPHRINB_REV_PATHWAY	1	1	9.37988e-05	1	1	1	1	1	1	1	1	1
1269950	bs_reactome	Ion channel transport	1	1	1	9.91472e-05	1	1	1	1	1	1	1	1
PID_P38_ALPHA_BETA_PATHWAY	CP	PID_P38_ALPHA_BETA_PATHWAY	1	1	0.000101713	1	1	1	1	1	1	1	1	1
1269519	bs_reactome	RHO GTPases Activate Formins	1	1	1	1	1	1	0.000109884	1	1	1	1	1
1268841	bs_reactome	Transcriptional activation of mitochondrial biogenesis	1	1	1	1	1	1	1	0.000124867	1	1	1	1
1269882	bs_reactome	Golgi Associated Vesicle Biogenesis	1	1	1	1	1	1	1	1	1	0.000125413	1	1
148661	bs_kegg	Bacterial invasion of epithelial cells	1	1	0.000127323	1	1	1	1	1	1	1	1	1
1269527	bs_reactome	Transcriptional activity of SMAD2/SMAD3:SMAD4 heterotrimer	1	1	1	1	1	1	1	0.000134413	1	1	1	1
1269865	bs_reactome	Meiosis	1	1	1	1	1	1	0.000134732	1	1	1	1	1
1268880	bs_reactome	Constitutive Signaling by Aberrant PI3K in Cancer	1	1	0.000153835	1	1	1	1	1	1	1	1	1
1268714	bs_reactome	Asparagine N-linked glycosylation	1	1	1	1	1	1	0.000154985	1	1	1	1	1
1270426	bs_reactome	Cellular Senescence	1	1	1	1	1	1	1	0.000206382	1	1	1	1
1269281	bs_reactome	Regulation of actin dynamics for phagocytic cup formation	1	1	0.000218586	1	1	1	1	1	1	1	1	1
PID_IL5_PATHWAY	CP	PID_IL5_PATHWAY	1	1	0.000221894	1	1	1	1	1	1	1	1	1
PID_TCR_RAS_PATHWAY	CP	PID_TCR_RAS_PATHWAY	1	1	0.000221894	1	1	1	1	1	1	1	1	1
1269880	bs_reactome	trans-Golgi Network Vesicle Budding	1	1	1	1	1	1	1	1	1	0.000228529	1	1
1269199	bs_reactome	Cross-presentation of soluble exogenous antigens (endosomes)	0.000231958	1	1	1	1	1	1	1	1	1	1	1
1269783	bs_reactome	CDK-mediated phosphorylation and removal of Cdc6	0.000231958	1	1	1	1	1	1	1	1	1	1	1
1269791	bs_reactome	Ubiquitin-dependent degradation of Cyclin D	0.000231958	1	1	1	1	1	1	1	1	1	1	1
1270174	bs_reactome	Regulation of ornithine decarboxylase (ODC)	0.000231958	1	1	1	1	1	1	1	1	1	1	1
1270296	bs_reactome	Regulation of activated PAK-2p34 by proteasome mediated degradation	0.000231958	1	1	1	1	1	1	1	1	1	1	1
1269107	bs_reactome	Vpu mediated degradation of CD4	0.000235743	1	1	1	1	1	1	1	1	1	1	1
1269747	bs_reactome	Autodegradation of the E3 ubiquitin ligase COP1	0.000235743	1	1	1	1	1	1	1	1	1	1	1
PID_ECADHERIN_STABILIZATION_PATHWAY	CP	PID_ECADHERIN_STABILIZATION_PATHWAY	1	1	0.000237353	1	1	1	1	1	1	1	1	1
1269750	bs_reactome	p53-Independent G1/S DNA damage checkpoint	0.000239722	1	1	1	1	1	1	1	1	1	1	1
1270295	bs_reactome	Regulation of Apoptosis	0.000239722	1	1	1	1	1	1	1	1	1	1	1
1269098	bs_reactome	Vif-mediated degradation of APOBEC3G	0.000243783	1	1	1	1	1	1	1	1	1	1	1
1269606	bs_reactome	Degradation of AXIN	0.000243783	1	1	1	1	1	1	1	1	1	1	1
1269746	bs_reactome	Stabilization of p53	0.000243783	1	1	1	1	1	1	1	1	1	1	1
1269841	bs_reactome	SCF-beta-TrCP mediated degradation of Emi1	0.000243783	1	1	1	1	1	1	1	1	1	1	1
1457807	bs_reactome	FBXL7 down-regulates AURKA during mitotic entry and in early mitosis	0.000243783	1	1	1	1	1	1	1	1	1	1	1
1270435	bs_reactome	HATs acetylate histones	1	1	1	1	1	1	1	0.000245546	1	1	1	1
PID_THROMBIN_PAR1_PATHWAY	CP	PID_THROMBIN_PAR1_PATHWAY	1	1	0.000251897	1	1	1	1	1	1	1	1	1
1269726	bs_reactome	AUF1 (hnRNP D0) binds and destabilizes mRNA	0.000252707	1	1	1	1	1	1	1	1	1	1	1
1268927	bs_reactome	Hh mutants abrogate ligand secretion	0.00025635	1	1	1	1	1	1	1	1	1	1	1
1268928	bs_reactome	Hh mutants that don't undergo autocatalytic processing are degraded by ERAD	0.00025635	1	1	1	1	1	1	1	1	1	1	1
1269306	bs_reactome	Dectin-1 mediated noncanonical NF-kB signaling	0.00025635	1	1	1	1	1	1	1	1	1	1	1
1269331	bs_reactome	NIK-->noncanonical NF-kB signaling	0.00025635	1	1	1	1	1	1	1	1	1	1	1
1269605	bs_reactome	Degradation of DVL	0.00025635	1	1	1	1	1	1	1	1	1	1	1
1269637	bs_reactome	GLI3 is processed to GLI3R by the proteasome	0.00025635	1	1	1	1	1	1	1	1	1	1	1
1269638	bs_reactome	Degradation of GLI2 by the proteasome	0.00025635	1	1	1	1	1	1	1	1	1	1	1
1269770	bs_reactome	SCF(Skp2)-mediated degradation of p27/p21	0.00025635	1	1	1	1	1	1	1	1	1	1	1
1269836	bs_reactome	CDT1 association with the CDC6:ORC:origin complex	0.00025635	1	1	1	1	1	1	1	1	1	1	1
1383017	bs_reactome	The role of GTSE1 in G2/M progression after G2 checkpoint	0.00025635	1	1	1	1	1	1	1	1	1	1	1
1268934	bs_reactome	Defective CFTR causes cystic fibrosis	0.000261688	1	1	1	1	1	1	1	1	1	1	1
1269639	bs_reactome	Degradation of GLI1 by the proteasome	0.000261688	1	1	1	1	1	1	1	1	1	1	1
1268839	bs_reactome	Mitochondrial biogenesis	1	1	1	1	1	1	1	0.00026229	1	1	1	1
153352	bs_kegg	Salivary secretion	1	1	0.000283418	1	1	1	1	1	1	1	1	1
1269852	bs_reactome	Autodegradation of Cdh1 by Cdh1:APC/C	0.000284047	1	1	1	1	1	1	1	1	1	1	1
1269744	bs_reactome	p53-Dependent G1/S DNA damage checkpoint	0.000293591	1	1	1	1	1	1	1	1	1	1	1
1269300	bs_reactome	FCERI mediated Ca+2 mobilization	1	1	0.000298785	1	1	1	1	1	1	1	1	1
1269180	bs_reactome	CD28 dependent Vav1 pathway	1	1	0.000300759	1	1	1	1	1	1	1	1	1
1269634	bs_reactome	Hedgehog ligand biogenesis	0.000313144	1	1	1	1	1	1	1	1	1	1	1
1269743	bs_reactome	G1/S DNA Damage Checkpoints	0.000313144	1	1	1	1	1	1	1	1	1	1	1
BIOCARTA_PYK2_PATHWAY	CP:BIOCARTA	BIOCARTA_PYK2_PATHWAY	1	1	0.000318506	1	1	1	1	1	1	1	1	1
1269186	bs_reactome	Activation of NF-kappaB in B cells	0.000318956	1	1	1	1	1	1	1	1	1	1	1
1269849	bs_reactome	APC/C:Cdc20 mediated degradation of Securin	0.000318956	1	1	1	1	1	1	1	1	1	1	1
1268933	bs_reactome	ABC transporter disorders	0.000320816	1	1	1	1	1	1	1	1	1	1	1
1269833	bs_reactome	Assembly of the pre-replicative complex	0.000320816	1	1	1	1	1	1	1	1	1	1	1
1427862	bs_reactome	Ub-specific processing proteases	0.000320816	1	1	1	1	1	1	1	1	1	1	1
BIOCARTA_AGPCR_PATHWAY	CP:BIOCARTA	BIOCARTA_AGPCR_PATHWAY	1	1	0.000329102	1	1	1	1	1	1	1	1	1
BIOCARTA_AT1R_PATHWAY	CP:BIOCARTA	BIOCARTA_AT1R_PATHWAY	1	1	0.000329102	1	1	1	1	1	1	1	1	1
BIOCARTA_BCR_PATHWAY	CP:BIOCARTA	BIOCARTA_BCR_PATHWAY	1	1	0.000329102	1	1	1	1	1	1	1	1	1
BIOCARTA_CBL_PATHWAY	CP:BIOCARTA	BIOCARTA_CBL_PATHWAY	1	1	0.000329102	1	1	1	1	1	1	1	1	1
BIOCARTA_FCER1_PATHWAY	CP:BIOCARTA	BIOCARTA_FCER1_PATHWAY	1	1	0.000329102	1	1	1	1	1	1	1	1	1
BIOCARTA_MET_PATHWAY	CP:BIOCARTA	BIOCARTA_MET_PATHWAY	1	1	0.000329102	1	1	1	1	1	1	1	1	1
BIOCARTA_MYOSIN_PATHWAY	CP:BIOCARTA	BIOCARTA_MYOSIN_PATHWAY	1	1	0.000329102	1	1	1	1	1	1	1	1	1
BIOCARTA_PAR1_PATHWAY	CP:BIOCARTA	BIOCARTA_PAR1_PATHWAY	1	1	0.000329102	1	1	1	1	1	1	1	1	1
BIOCARTA_SRCRPTP_PATHWAY	CP:BIOCARTA	BIOCARTA_SRCRPTP_PATHWAY	1	1	0.000329102	1	1	1	1	1	1	1	1	1
1269778	bs_reactome	Cyclin A:Cdk2-associated events at S phase entry	0.000345363	1	1	1	1	1	1	1	1	1	1	1
1269769	bs_reactome	Cyclin E associated events during G1/S transition	0.000351549	1	1	1	1	1	1	1	1	1	1	1
1269781	bs_reactome	Switching of origins to a post-replicative state	0.000351549	1	1	1	1	1	1	1	1	1	1	1
1269846	bs_reactome	Cdc20:Phospho-APC/C mediated degradation of Cyclin A	0.000357841	1	1	1	1	1	1	1	1	1	1	1
1269851	bs_reactome	APC/C:Cdh1 mediated degradation of Cdc20 and other APC/C:Cdh1 targeted proteins in late mitosis/early G1	0.000357841	1	1	1	1	1	1	1	1	1	1	1
1269796	bs_reactome	Removal of licensing factors from origins	0.000360098	1	1	1	1	1	1	1	1	1	1	1
1269845	bs_reactome	APC:Cdc20 mediated degradation of cell cycle proteins prior to satisfation of the cell cycle checkpoint	0.000360098	1	1	1	1	1	1	1	1	1	1	1
BIOCARTA_CELL2CELL_PATHWAY	CP:BIOCARTA	BIOCARTA_CELL2CELL_PATHWAY	1	1	0.000371451	1	1	1	1	1	1	1	1	1
1268932	bs_reactome	Disorders of transmembrane transporters	0.000381524	1	1	1	1	1	1	1	1	1	1	1
1269844	bs_reactome	APC/C:Cdc20 mediated degradation of mitotic proteins	0.000381524	1	1	1	1	1	1	1	1	1	1	1
1270313	bs_reactome	NCAM1 interactions	1	0.000386452	1	1	1	1	1	1	1	1	1	1
1269794	bs_reactome	Regulation of DNA replication	0.0003882	1	1	1	1	1	1	1	1	1	1	1
1269842	bs_reactome	Activation of APC/C and APC/C:Cdc20 mediated degradation of mitotic proteins	0.0003882	1	1	1	1	1	1	1	1	1	1	1
546258	bs_kegg	Cocaine addiction	1	1	0.000389264	1	1	1	1	1	1	1	1	1
1457784	bs_reactome	Signaling by moderate kinase activity BRAF mutants	1	1	0.000401258	1	1	1	1	1	1	1	1	1
521	bs_kegg	Endometrial cancer	1	1	0.000410264	1	1	1	1	1	1	1	1	1
1269839	bs_reactome	Regulation of APC/C activators between G1/S and early anaphase	0.000447176	1	1	1	1	1	1	1	1	1	1	1
1269596	bs_reactome	Degradation of beta-catenin by the destruction complex	0.000476047	1	1	1	1	1	1	1	1	1	1	1
491	bs_kegg	T cell receptor signaling pathway	1	1	0.000478202	1	1	1	1	1	1	1	1	1
1269197	bs_reactome	ER-Phagosome pathway	0.000500664	1	1	1	1	1	1	1	1	1	1	1
1269301	bs_reactome	FCERI mediated NF-kB activation	0.000500664	1	1	1	1	1	1	1	1	1	1	1
1470925	bs_reactome	TBC/RABGAPs	1	1	1	1	1	1	1	1	0.000500967	1	1	1
1269831	bs_reactome	M/G1 Transition	0.0005132	1	1	1	1	1	1	1	1	1	1	1
1269640	bs_reactome	Hedgehog 'on' state	0.00051537	1	1	1	1	1	1	1	1	1	1	1
1269837	bs_reactome	Regulation of mitotic cell cycle	0.00051537	1	1	1	1	1	1	1	1	1	1	1
1270170	bs_reactome	Metabolism of polyamines	0.00051537	1	1	1	1	1	1	1	1	1	1	1
BIOCARTA_EGFR_SMRTE_PATHWAY	CP:BIOCARTA	BIOCARTA_EGFR_SMRTE_PATHWAY	1	1	1	1	1	1	1	0.00051999	1	1	1	1
1269373	bs_reactome	Cell surface interactions at the vascular wall	1	1	0.000533534	1	1	1	1	1	1	1	1	1
516	bs_kegg	Pathogenic Escherichia coli infection	1	1	0.000552279	1	1	1	1	1	1	1	1	1
PID_RAC1_PATHWAY	CP	PID_RAC1_PATHWAY	1	1	0.000558637	1	1	1	1	1	1	1	1	1
ST_WNT_CA2_CYCLIC_GMP_PATHWAY	CP	ST_WNT_CA2_CYCLIC_GMP_PATHWAY	1	1	0.000558637	1	1	1	1	1	1	1	1	1
[truncated: 391 more rows]

## Sheet: 6
gsid	db_source	name	N	wb	bb	bd	wbd	exp	p	p_adj	cluster	genes	nGEN	nEPI	nTRA
[truncated: 1,133 more rows]

[truncated: 8 more sheets: 7, legend 1, legend 2, legend 3, legend 4, legend 5, legend 6, legend 7]
